# Supplementary material for: The Genetic Architecture of Milling Quality in Spring Oat Lines of the Collaborative Oat Research Enterprise
Source: MDPI journal article supplement (doi:10.3390/foods10102479), 2021-10-16

Supplemental Figure S1. The phenotypic distributions of 6 milling quality-related traits averaged across location years.

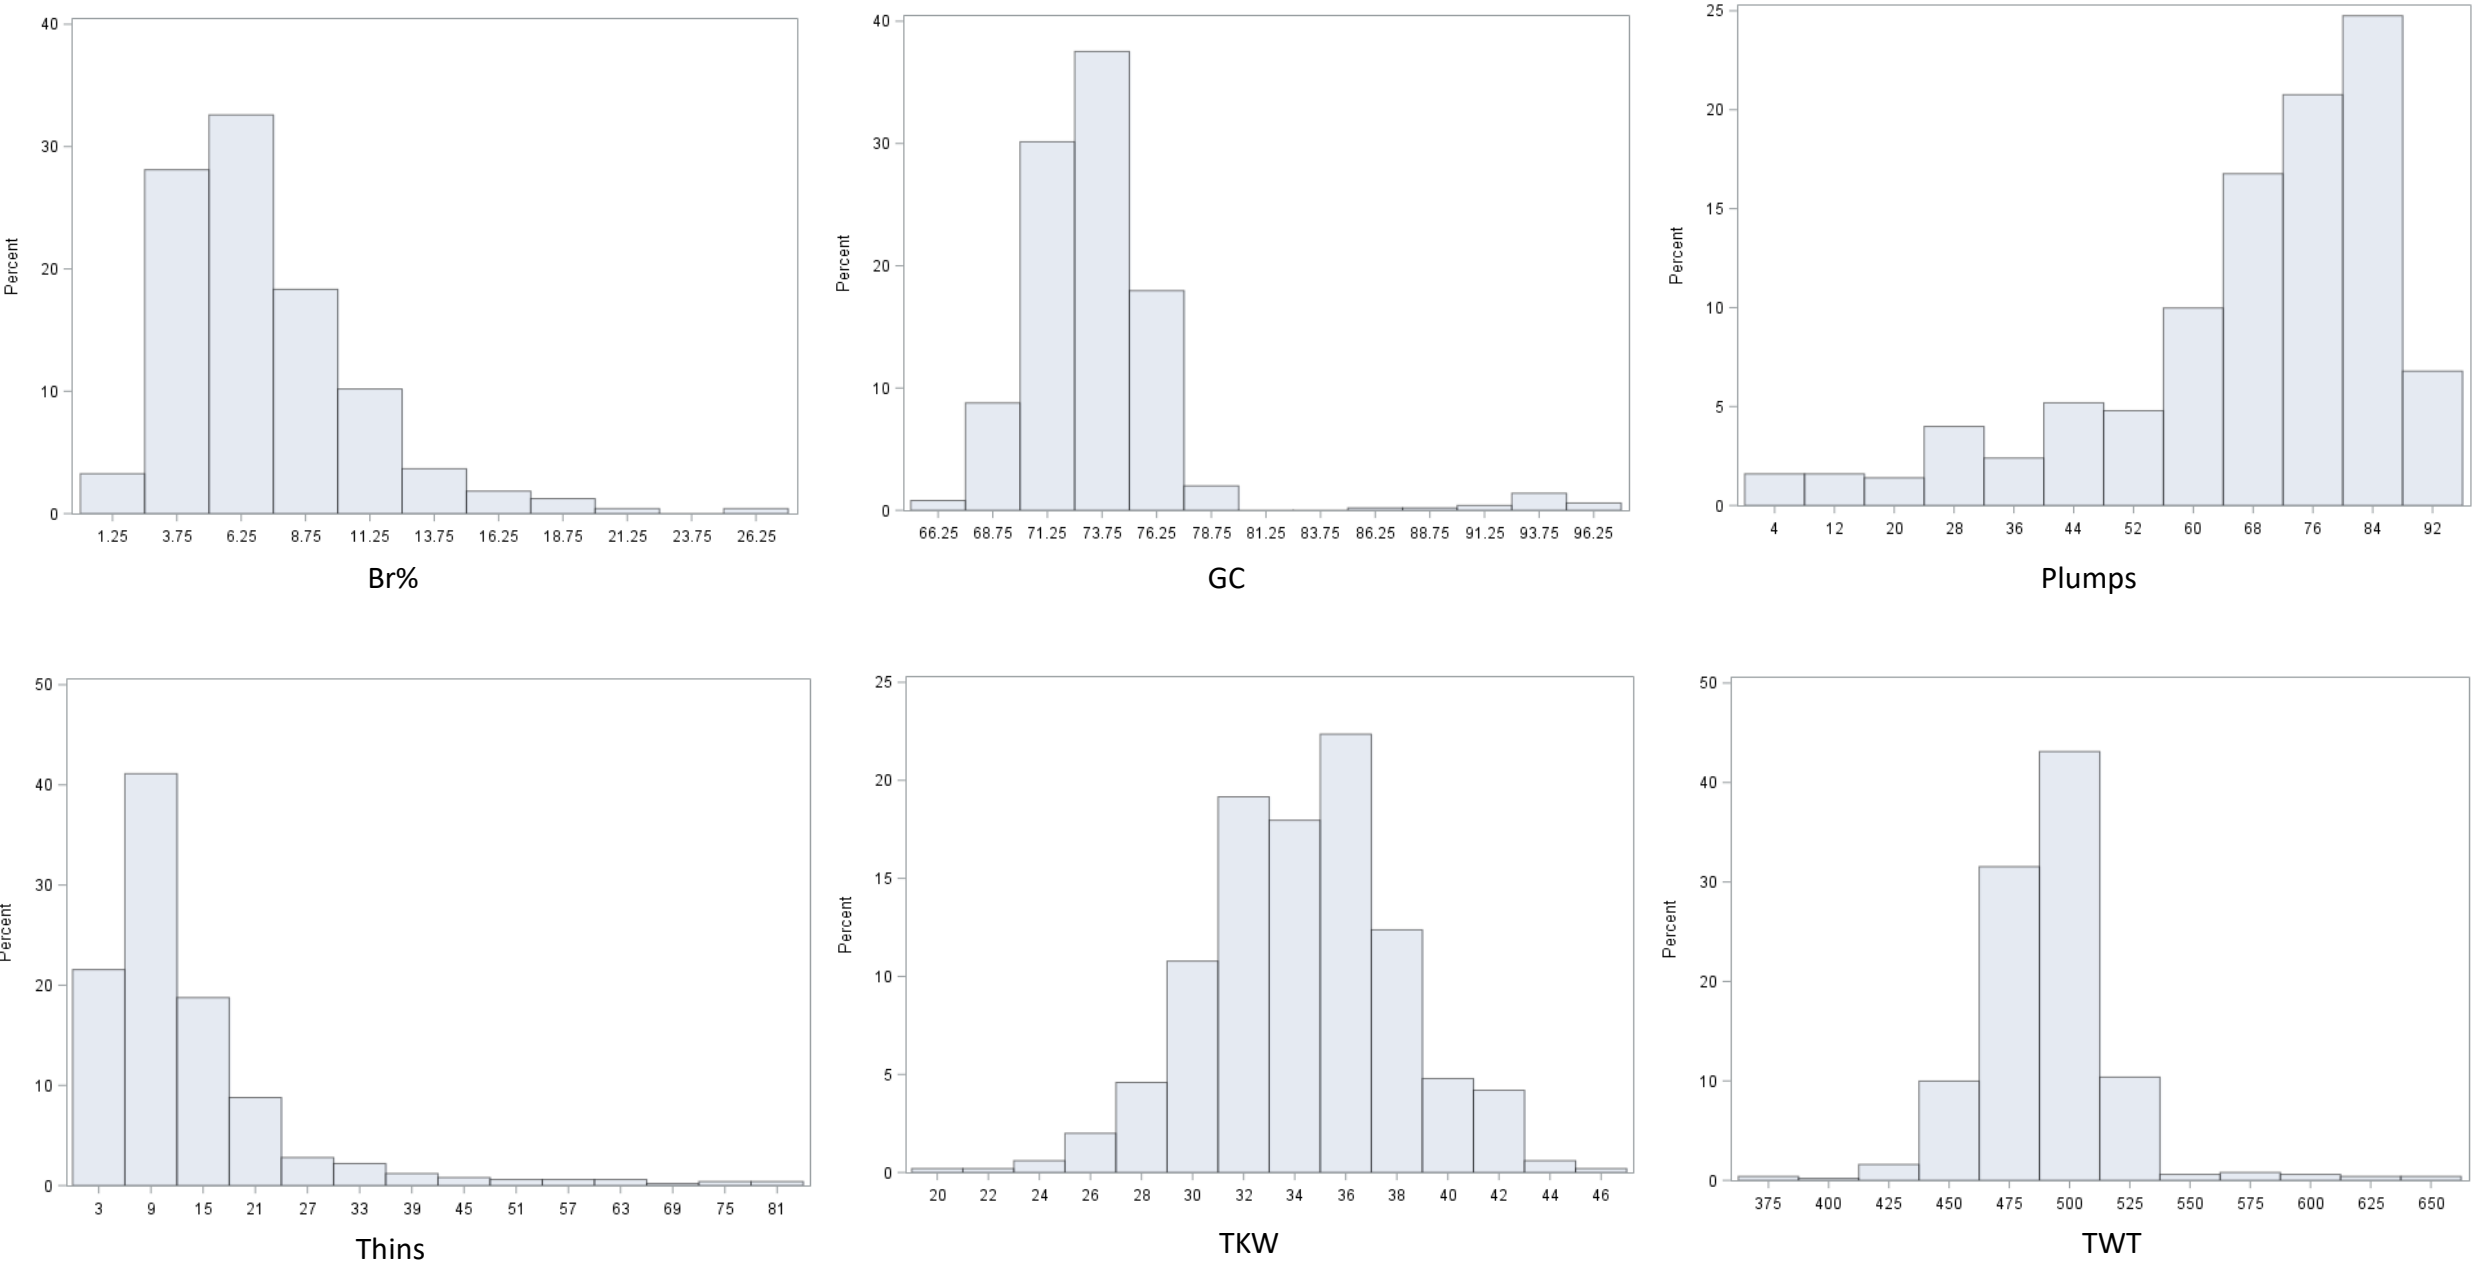

Supplement: s1 [file s1]
