# Supplementary material for: The Genetic Architecture of Milling Quality in Spring Oat Lines of the Collaborative Oat Research Enterprise
Source: Foods. 2021 Oct 16;10(10):2479. doi: 10.3390/foods10102479 (PMC8535619; doi:10.3390/foods10102479)
Supplement: Supplementary file 1 [file foods-10-02479-s001.zip › Supplemental Table S1.xlsx]

## Sheet: p-values
P-values from tests of association between milling quality trait means and variances across location years, trait levels within location year and SNP genotype for SNPs with P≤1.41E-06 in at least one experiment.
QTL	Locus	MAF	LG	Chr	cM	logBG_mn	logBG_Var	Aber17_Logbrok	farg11_Logbrok	laco11_Logbrok	teto10_Logbrok	teto11_Logbrok	GC_mn	GC_Var	farg11_GC	laco11_GC	sask10_GC	sask11_GC	teto10_GC	teto11_GC	Plump_mn	Plump_Var	Aber17_plumps	sask10_Plump	sask11_Plump	teto10_Plump	teto11_Plump	logThin_mn	logThin_Var	Aber10_LogThins	Aber17_Logthins	farg10_LogThin	farg11_LogThin	laco10_LogThin	ott10_LogThin	sask10_LogThin	sask11_LogThin	teto10_LogThin	teto11_LogThin	TKW_mn	TKW_Var	Aber17_TGW	aby10_TGW	laco10_TGW	ott10_tgw	sask10_TGW	sask11_TGW	TWT_mn	TWT_Var
Qbr%.CORE.6A	avgbs2_58834.1.20	0.237525	Mrg05	Chr6A	135.5	1.1511e-07	0.82484	2.8993e-05	3.6185e-05	0.00294	4.0565e-05	0.00123	0.85568	0.89366	0.70851	0.31523	0.23893	0.86607	0.61546	0.02566	0.39279	0.55097	0.56283	0.33107	0.33665	0.26316	0.67006	0.85544	0.54756	0.69218	0.77905	0.47203	0.91787	0.86054	0.39432	0.59927	0.58541	0.63635	0.63853	0.83692	0.44627	0.62652	0.58034	0.73606	0.65541	0.97173	0.88285	0.56519	0.96069
QBr%.CORE.Unk	avgbs2_60654.1.6	0.0399202				2.9179e-07	0.56357	0.00142	0.00319	0.00037566	0.00359	0.06762	0.16196	0.10043	0.19582	0.35674	0.35183	0.23826	0.25594	0.15579	0.78673	0.07725	0.32575	0.50908	0.85015	0.44757	0.60954	0.82656	0.82095	0.50531	0.64001	0.83638	0.30699	0.41356	0.37887	0.56358	0.89331	0.26663	0.6355	0.23965	0.42922	0.31769	0.17777	0.39888	0.52683	0.41826	0.29384	0.36608	0.741
QBr%.Lacom11.4C	avgbs_cluster_14607.1.44	0.133733	Mrg11	Chr4C	52.8	0.00641	0.27953	0.19736	0.21841	6.7253e-07	0.68164	0.05118	0.17098	0.02239	0.2429	3.4496e-05	0.45462	0.10959	0.77098	0.77812	0.00781	0.62229	0.00659	0.08061	0.05197	0.52983	0.0309	0.04315	0.08492	0.50184	0.0697	0.15814	0.06007	0.11093	0.2247	0.20097	0.08216	0.33964	0.20949	0.3911	0.91493	0.15757	0.52229	0.40594	0.85909	0.64684	0.37956	0.23372	0.32088
QBr%.Lacom11.4C	avgbs_cluster_40881.1.25	0.321357				3.0977e-05	0.14585	0.09363	0.02752	8.4035e-07	0.02206	0.00327	0.83749	0.34229	0.82522	0.49819	0.8163	0.56668	0.89918	0.64405	0.85145	0.36887	0.9153	0.89071	0.62958	0.94641	0.80303	0.77009	0.8345	0.76251	0.87889	0.9509	0.83822	0.54186	0.39665	0.96681	0.98596	0.62364	0.91542	0.2306	0.46021	0.45389	0.49027	0.84932	0.14229	0.61851	0.51325	0.40615	0.07388
QGC.Lacom11.3C	avgbs2_40053.2.56	0.0998004	Mrg15	Chr3C	35.1	0.09334	0.71725	0.61373	0.45693	0.0002758	0.4089	0.51058	0.71485	3.9674e-05	0.67538	3.5144e-07	0.68058	0.51753	0.64911	0.45986	0.10387	0.27428	0.08215	0.69178	0.31229	0.82961	0.18472	0.13248	0.42759	0.57337	0.16097	0.0994	0.19725	0.4075	0.75343	0.41217	0.27815	0.94704	0.28013	0.1447	0.79888	0.07592	0.50139	0.08542	0.96446	0.73541	0.44367	0.48444	0.92876
QGC.Lacom11.3C	avgbs_cluster_13860.1.30	0.101796	Mrg15	Chr3C	35.1	0.09162	0.27877	0.57686	0.43072	0.00010084	0.66064	0.48404	0.65239	1.4861e-05	0.41997	2.0572e-07	0.75088	0.41179	0.8639	0.3333	0.12295	0.42236	0.06271	0.76461	0.37261	0.63697	0.28072	0.12876	0.58027	0.59024	0.15456	0.17147	0.2162	0.30327	0.57989	0.23329	0.30521	0.46834	0.43013	0.14314	0.8525	0.04174	0.46377	0.2011	0.39969	0.53781	0.4679	0.88744	0.87918
QGC.Lacom11.3C	avgbs_cluster_37563.1.10	0.101796	Mrg15	Chr3C	35.1	0.11281	0.70368	0.50618	0.4974	0.0003174	0.9139	0.41349	0.59549	4.5329e-05	0.75834	4.1561e-07	0.86002	0.55286	0.7572	0.51733	0.10522	0.39864	0.10541	0.77428	0.36707	0.60186	0.12729	0.16675	0.44677	0.65413	0.21362	0.16553	0.20221	0.33647	0.68135	0.68173	0.37884	0.63637	0.16873	0.15842	0.64875	0.08988	0.61299	0.05928	0.53424	0.88747	0.41699	0.44966	0.90242
QGC.Lacom11.3C	avgbs2_181164.1.33	0.113772	Mrg15	Chr3C	35.1	0.12063	0.80919	0.42827	0.59967	0.00011238	0.95407	0.55792	0.74068	2.05e-05	0.67976	1.6708e-07	0.54218	0.47236	0.83039	0.39758	0.10002	0.69406	0.09616	0.77771	0.32458	0.97855	0.20734	0.1952	0.6057	0.66148	0.16652	0.17325	0.32881	0.43301	0.51445	0.68558	0.38647	0.80811	0.40523	0.13396	0.65708	0.03999	0.52486	0.16513	0.22151	0.64165	0.57228	0.68644	0.98479
QGC.Lacom11.3C	avgbs2_35242.1.27	0.201597				0.1067	0.53266	0.36902	0.66385	0.00022597	0.51235	0.14172	0.37843	4.4175e-05	0.525	4.93e-08	0.56256	0.2076	0.7004	0.67019	0.17901	0.28446	0.0865	0.97646	0.41404	0.69908	0.16764	0.0886	0.53537	0.03894	0.06652	0.11533	0.37552	0.03474	0.22814	0.65926	0.35011	0.51181	0.13069	0.22417	0.42359	0.06867	0.2907	0.28283	0.5519	0.50681	0.66698	0.70684	0.94602
QGC.Lacom11.Unk1	avgbs_cluster_2257.1.19	0.131737	Mrg28	Chr1C	43.8	0.08198	0.88295	0.45102	0.3925	0.00028508	0.5674	0.50097	0.81098	0.00012136	0.74762	6.9957e-07	0.95993	0.49527	0.44166	0.40684	0.10324	0.16342	0.10234	0.39441	0.37839	0.47742	0.08274	0.10397	0.60935	0.59678	0.25819	0.10334	0.1645	0.27226	0.12105	0.31097	0.32223	0.46839	0.10072	0.11035	0.5843	0.05729	0.58016	0.20165	0.78177	0.42286	0.49604	0.87868	0.68293
QGC.Lacom11.Unk1	avgbs2_43392.1.10	0.0199601	Mrg01	Chr1D	7.9	0.09389	0.60413	0.60147	0.47923	0.00020263	0.07021	0.53679	0.53346	7.2816e-05	0.73805	1.7473e-07	0.74253	0.17751	0.44862	0.2662	0.17116	0.65165	0.10973	0.9151	0.49943	0.39762	0.30982	0.22114	0.48047	0.43015	0.19282	0.2026	0.39089	0.42873	0.51129	0.40165	0.34893	0.16168	0.46294	0.20378	0.02518	0.06375	0.65822	0.29632	0.6035	0.9568	0.69177	0.86433	0.78871
QGC.Lacom11.Unk1	avgbs2_177182.1.26	0.0219561	Mrg01	Chr1D	8.9	0.09023	0.78565	0.61137	0.50795	0.0002904	0.0235	0.43502	0.31643	9.8998e-05	0.75851	8.8473e-08	0.50934	0.13675	0.13562	0.11873	0.1075	0.69429	0.11743	0.35432	0.24981	0.92973	0.17757	0.11149	0.61432	0.24414	0.20999	0.14997	0.28165	0.4616	0.15709	0.14823	0.13442	0.86374	0.29554	0.21727	0.08632	0.07149	0.62779	0.23317	0.61532	0.9192	0.63736	0.7093	0.78077
QGC.Lacom11.Unk1	avgbs2_1095.1.48	0.0259481	Mrg01	Chr1D	9.2	0.07984	0.83406	0.44208	0.42658	9.0657e-05	0.29181	0.56228	0.42189	5.5078e-05	0.67629	1.4553e-07	0.24575	0.08834	0.64006	0.6531	0.03316	0.70803	0.03784	0.06427	0.08799	0.81937	0.12325	0.03227	0.1446	0.06862	0.1189	0.05124	0.30011	0.13909	0.12858	0.01864	0.04682	0.86467	0.35408	0.07163	0.25339	0.0442	0.18694	0.18774	0.77878	0.17097	0.18659	0.88705	0.8168
QGC.Lacom11.Unk1	avgbs2_117922.1.6	0.0279441	Mrg01	Chr1D	9.2	0.1075	0.96882	0.37609	0.38072	0.00050647	0.19228	0.6098	0.48583	4.5875e-05	0.70552	3.5173e-07	0.59612	0.192	0.36767	0.4605	0.0937	0.6566	0.0926	0.07013	0.15824	0.6472	0.29842	0.16119	0.25209	0.1575	0.39663	0.3122	0.41041	0.55594	0.23989	0.05761	0.06765	0.39714	0.48985	0.22652	0.40496	0.22901	0.13204	0.36549	0.78486	0.46951	0.40804	0.93234	0.81555
QGC.Lacom11.Unk1	avgbs2_47818.1.7	0.0239521	Mrg01	Chr1D	9.5	0.11816	0.95216	0.54787	0.35895	0.00049651	0.69288	0.59458	0.78479	9.3815e-05	0.81477	2.619e-07	0.54581	0.3619	0.80357	0.48785	0.16761	0.53248	0.14616	0.4083	0.41159	0.46412	0.29806	0.21203	0.44117	0.61223	0.27738	0.1465	0.41718	0.41688	0.16688	0.21854	0.33261	0.39812	0.4243	0.19225	0.09282	0.11707	0.31189	0.25936	0.27798	0.89096	0.64193	0.78756	0.83972
QGC.Lacom11.Unk1	avgbs_407016.1.12	0.0239521	Mrg01	Chr1D	10.2	0.10086	0.49025	0.60274	0.3462	0.00033062	0.91774	0.56004	0.41274	9.4515e-05	0.51151	2.3934e-07	0.37378	0.19339	0.13582	0.37707	0.12485	0.65306	0.13737	0.17133	0.25231	0.8466	0.22975	0.13028	0.31021	0.07584	0.29046	0.24063	0.42285	0.07811	0.93907	0.13924	0.09042	0.9328	0.34936	0.21518	0.55002	0.12053	0.30883	0.18553	0.37219	0.59978	0.41297	0.75379	0.9148
QGC.Lacom11.Unk1	avgbs_245659.1.26	0.121756	Mrg01	Chr1D	76.6	0.07985	0.73429	0.43844	0.58753	0.00025513	0.21664	0.49144	0.65152	0.00012256	0.82436	5.5502e-07	0.34033	0.53701	0.45408	0.13975	0.12679	0.44777	0.1581	0.95522	0.29138	0.06695	0.04001	0.21821	0.01455	0.2626	0.30825	0.12146	0.27455	0.48451	0.54128	0.90905	0.41997	0.04139	0.05777	0.04908	0.28602	0.0556	0.36478	0.03533	0.10322	0.27809	0.45822	0.80776	0.30289
QGC.Lacom11.Unk1	avgbs2_183920.1.38	0.0299401	Mrg13	Chr2C	39.4	0.09993	0.66456	0.66006	0.63726	0.00024869	0.84651	0.61757	0.65031	1.2356e-05	0.24241	3.4219e-08	0.3216	0.29045	0.73626	0.57737	0.06206	0.40763	0.07279	0.821	0.0537	0.97693	0.06514	0.06689	0.61421	0.16032	0.19201	0.07479	0.14907	0.27501	0.18544	0.38704	0.12292	0.96539	0.1607	0.1995	0.23702	0.06175	0.5484	0.2028	0.03536	0.47647	0.59901	0.92656	0.95916
QGC.Lacom11.Unk1	avgbs_cluster_3483.1.29	0.159681	Mrg13	Chr2C	76	0.07495	0.60208	0.56599	0.51701	9.4164e-05	0.35565	0.32285	0.61673	5.7748e-05	0.54512	7.9679e-08	0.20067	0.41005	0.56245	0.57833	0.26157	0.64123	0.18764	0.65916	0.6465	0.31886	0.32513	0.46542	0.6072	0.68641	0.17924	0.30853	0.46254	0.70365	0.45397	0.86334	0.57145	0.2337	0.51623	0.30335	0.42714	0.08124	0.73299	0.32312	0.78176	0.9608	0.79353	0.64415	0.83011
QGC.Lacom11.Unk1	avgbs_cluster_27539.1.10	0.0319361	Mrg08	Chr2D	121.2	0.11615	0.60102	0.07666	0.55685	0.00010724	0.32345	0.50117	0.56991	3.9447e-05	0.36833	3.6713e-08	0.92789	0.32791	0.36771	0.88329	0.02732	0.7898	0.04155	0.13818	0.06251	0.56796	0.12897	0.07564	0.15133	0.75343	0.09207	0.0689	0.08109	0.19229	0.962	0.24557	0.02973	0.83822	0.36576	0.03731	0.74484	0.01206	0.33827	0.22348	0.22751	0.20857	0.17213	0.98559	0.85849
QGC.Lacom11.Unk1	avgbs_cluster_32289.1.19	0.0199601	Mrg08	Chr2D	147.3	0.07961	0.75572	0.27355	0.17142	0.00027099	0.80441	0.31391	0.4749	3.139e-05	0.57394	6.0699e-07	0.75048	0.24569	0.19179	0.63427	0.20534	0.62645	0.10582	0.46539	0.5715	0.62835	0.29377	0.25024	0.43151	0.65967	0.3192	0.24897	0.26844	0.33164	0.98486	0.36016	0.55646	0.8837	0.34647	0.10679	0.4849	0.05894	0.34737	0.34129	0.17855	0.1788	0.44725	0.78244	0.80439
QGC.Lacom11.Unk1	avgbs2_126920.1.14	0.0319361	Mrg23	Chr3A	53.7	0.14566	0.72977	0.66962	0.16343	0.0003477	0.87069	0.55966	0.06455	0.00016105	0.06116	2.8344e-07	0.18545	0.29449	0.90612	0.56339	0.0668	0.43658	0.04653	0.99786	0.10868	0.40782	0.05334	0.14378	0.54015	0.63892	0.13106	0.11653	0.34238	0.35735	0.93944	0.73639	0.134	0.86551	0.10035	0.16441	0.53179	0.09312	0.7053	0.13642	0.71646	0.61588	0.3818	0.00073272	0.80693
QGC.Lacom11.Unk1	avgbs_112528.1.57	0.0439122	Mrg15	Chr3C	49.5	0.09742	0.29912	0.48479	0.60929	0.00020164	0.52707	0.30075	0.49635	4.7021e-05	0.09958	8.1048e-07	0.81455	0.31388	0.50701	0.61388	0.22843	0.20885	0.14564	0.75197	0.29721	0.35969	0.40356	0.37847	0.67513	0.59999	0.47049	0.32888	0.3079	0.62009	0.29204	0.84759	0.46638	0.64065	0.49648	0.17459	0.71218	0.13128	0.5714	0.15991	0.79791	0.80705	0.65349	0.55192	0.88073
QGC.Lacom11.Unk1	avgbs_cluster_11893.1.14	0.0718563	Mrg15	Chr3C	49.5	0.08089	0.26079	0.64869	0.35223	0.00023254	0.35742	0.56763	0.50995	2.8159e-05	0.36369	3.0962e-07	0.78504	0.33331	0.61167	0.56163	0.11923	0.12598	0.04591	0.70381	0.20249	0.41345	0.33577	0.20568	0.29289	0.64052	0.18842	0.13157	0.3483	0.42214	0.46928	0.38402	0.33044	0.79191	0.43936	0.09006	0.7431	0.07647	0.36903	0.35356	0.47736	0.96768	0.45149	0.73419	0.52654
QGC.Lacom11.Unk1	avgbs_cluster_25775.1.43	0.151697	Mrg15	Chr3C	49.5	0.15306	0.90994	0.56942	0.70296	0.0003545	0.53778	0.48966	0.4733	1.1787e-05	0.4292	4.2093e-08	0.35864	0.28011	0.31286	0.65588	0.11775	0.58538	0.08843	0.97207	0.34282	0.7059	0.28177	0.20239	0.58192	0.58991	0.21573	0.16219	0.29721	0.42789	0.6201	0.50848	0.33634	0.14335	0.34945	0.08065	0.16051	0.05518	0.54944	0.1294	0.0708	0.89102	0.72963	0.97425	0.196
QGC.Lacom11.Unk1	avgbs_111461.1.54	0.0838323	Mrg15	Chr3C	50.3	0.09365	0.55059	0.61969	0.41548	0.00012705	0.71552	0.40824	0.31647	7.0107e-06	0.33685	3.7789e-07	0.93097	0.29127	0.38927	0.48959	0.15705	0.43277	0.12983	0.57216	0.42189	0.6541	0.29545	0.16681	0.35787	0.66548	0.28504	0.08216	0.33874	0.41657	0.69512	0.13173	0.24058	0.81165	0.34259	0.17544	0.39736	0.0663	0.54367	0.28249	0.30921	0.53829	0.42475	0.42121	0.31574
QGC.Lacom11.Unk1	avgbs_53792.1.16	0.307385	Mrg20	Chr4A	18.7	0.12887	0.13001	0.48476	0.48464	0.00017716	0.09946	0.56451	0.67169	6.5066e-05	0.04387	4.3512e-07	0.90635	0.43864	0.08442	0.17028	0.0849	0.48824	0.02072	0.35462	0.40907	0.58837	0.23014	0.11707	0.54595	0.63788	0.10058	0.15382	0.22857	0.1811	0.92108	0.37209	0.31803	0.60961	0.41731	0.13358	0.55612	0.00835	0.38149	0.36441	0.73175	0.5444	0.37041	0.9355	0.46186
QGC.Lacom11.Unk1	avgbs2_31297.1.8	0.279441	Mrg20	Chr4A	243.9	0.10255	0.72624	0.62387	0.73576	0.00040501	0.23872	0.12915	0.00115	5.9535e-05	0.79433	5.1723e-07	0.83291	0.00057308	0.74087	0.43231	0.00722	0.02285	0.02882	0.0046	0.05227	0.02526	0.0066	0.00169	0.47027	0.04567	0.00165	0.02349	0.03002	0.00762	0.00081395	0.00409	0.01358	0.01206	0.00592	0.00281	0.57931	0.00077119	0.01227	0.154	0.31128	0.00082322	0.03268	0.26417	0.45953
QGC.Lacom11.Unk1	avgbs_201865.1.64	0.0998004	Mrg20	Chr4A	253.7	0.05522	0.9996	0.62384	0.52642	9.7764e-05	0.22311	0.48343	0.57646	1.5233e-05	0.5373	2.9268e-07	0.90094	0.3757	0.71967	0.65434	0.12361	0.61708	0.11646	0.43997	0.44408	0.39413	0.17811	0.17691	0.49961	0.62269	0.2286	0.12514	0.21901	0.27182	0.95499	0.86333	0.38954	0.29702	0.23169	0.13439	0.70034	0.04678	0.52316	0.16876	0.66912	0.98219	0.48315	0.96919	0.83919
QGC.Lacom11.Unk1	avgbs_cluster_5099.1.14	0.199601	Mrg11	Chr4C	21.4	0.09433	0.97867	0.61543	0.70922	0.00020892	0.64814	0.25382	0.55233	8.6564e-05	0.68476	3.7957e-07	0.84782	0.34812	0.75132	0.60705	0.03724	0.68045	0.03076	0.021	0.22594	0.3135	0.06315	0.13638	0.23772	0.71481	0.08095	0.15697	0.09263	0.37296	0.61715	0.17201	0.3581	0.23077	0.14699	0.18423	0.55299	0.02806	0.79503	0.33709	0.39737	0.15352	0.66491	0.82201	0.6672
QGC.Lacom11.Unk1	avgbs_201564.1.17	0.0419162	Mrg11	Chr4C	21.9	0.10742	0.91221	0.52473	0.659	0.00041445	0.5285	0.36626	0.76578	1.821e-05	0.4435	3.0781e-07	0.76546	0.50077	0.47239	0.54208	0.2064	0.58704	0.13428	0.52937	0.46761	0.61953	0.3692	0.26478	0.63218	0.35052	0.30443	0.24888	0.42714	0.51946	0.29408	0.93519	0.46225	0.86104	0.51118	0.1293	0.40318	0.09042	0.51229	0.28597	0.10381	0.48183	0.52539	0.37674	0.1179
QGC.Lacom11.Unk1	avgbs_220815.1.53	0.0319361	Mrg11	Chr4C	26	0.06601	0.74909	0.42623	0.40567	2.8545e-05	0.58021	0.31634	0.28748	4.4154e-05	0.38554	3.4206e-07	0.76599	0.18708	0.69831	0.40418	0.08608	0.61436	0.07543	0.16609	0.30406	0.52019	0.2862	0.19821	0.11094	0.39201	0.30117	0.22702	0.35101	0.42048	0.53419	0.67968	0.40681	0.72944	0.40604	0.03284	0.56694	0.03528	0.24538	0.18222	0.27096	0.34967	0.17093	0.28918	0.00581
QGC.Lacom11.Unk1	avgbs_cluster_32840.1.16	0.0319361	Mrg11	Chr4C	26	0.09059	0.81749	0.26639	0.60935	0.00035143	0.58013	0.39833	0.62197	3.6163e-05	0.65272	4.4047e-07	0.58595	0.33427	0.61776	0.51904	0.2324	0.77273	0.12353	0.66982	0.40914	0.5947	0.43343	0.24984	0.44501	0.48355	0.3251	0.13561	0.23516	0.26807	0.85903	0.98073	0.28329	0.95007	0.58029	0.22672	0.28508	0.08201	0.65494	0.13805	0.28779	0.76381	0.59921	0.17425	0.76144
QGC.Lacom11.Unk1	avgbs_46776.1.58	0.0339321	Mrg11	Chr4C	26	0.12963	0.90762	0.18772	0.57454	0.00029578	0.8986	0.62273	0.75961	8.3862e-05	0.76071	2.267e-07	0.58864	0.54732	0.92084	0.61314	0.1408	0.6694	0.11721	0.77108	0.43823	0.70685	0.2687	0.16715	0.17844	0.38649	0.26327	0.19129	0.30852	0.46655	0.51516	0.63877	0.36179	0.99353	0.48842	0.11421	0.16195	0.08132	0.52714	0.24412	0.16625	0.99429	0.49741	0.33725	0.03476
QGC.Lacom11.Unk1	avgbs_1406.1.21	0.0399202	Mrg11	Chr4C	26	0.13171	0.94659	0.17328	0.65488	0.00052572	0.53928	0.41557	0.76979	0.00010099	0.76895	2.2234e-07	0.85475	0.4183	0.73049	0.47227	0.19998	0.58952	0.12338	0.85211	0.45146	0.55753	0.28115	0.21681	0.38702	0.51615	0.18049	0.18806	0.26345	0.43867	0.36326	0.76528	0.40075	0.89687	0.40599	0.25423	0.44853	0.11291	0.64947	0.22659	0.66759	0.7235	0.58045	0.20526	0.91357
QGC.Lacom11.Unk1	avgbs_cluster_29596.1.29	0.0399202	Mrg11	Chr4C	26	0.08882	0.83984	0.47104	0.60959	0.00013401	0.24957	0.54737	0.39797	7.979e-06	0.49828	1.8798e-07	0.08587	0.31388	0.7073	0.74226	0.17864	0.60624	0.13212	0.31823	0.46331	0.67402	0.26355	0.26343	0.70959	0.35816	0.33735	0.16248	0.50249	0.51226	0.1425	0.959	0.38581	0.94894	0.3823	0.18769	0.35079	0.07213	0.62847	0.16949	0.32598	0.49508	0.57518	0.4797	0.72461
QGC.Lacom11.Unk1	avgbs_cluster_31604.1.59	0.0978044	Mrg11	Chr4C	26	0.01222	0.82249	0.29709	0.02914	3.2334e-05	0.76966	0.14036	0.61498	2.8699e-06	0.75979	2.347e-07	0.04602	0.29049	0.8928	0.48397	0.11041	0.64109	0.07588	0.08495	0.36477	0.75353	0.31742	0.07032	0.277	0.50888	0.166	0.09869	0.08488	0.15693	0.5078	0.14654	0.29024	0.71547	0.4396	0.06777	0.40145	0.07459	0.47683	0.01816	0.36527	0.02216	0.27294	0.39928	0.89677
QGC.Lacom11.Unk1	avgbs_cluster_37648.1.13	0.0199601	Mrg11	Chr4C	28.6	0.08605	0.96315	0.22425	0.15717	0.00021938	0.84015	0.53071	0.21734	4.8077e-05	0.73391	7.5189e-07	0.87488	0.16782	0.15366	0.37335	0.11007	0.62019	0.16861	0.07536	0.46992	0.72754	0.23994	0.19363	0.05632	0.74222	0.36404	0.1377	0.06929	0.51163	0.81745	0.29073	0.42389	0.76536	0.42955	0.14447	0.63363	0.11325	0.54032	0.2384	0.22629	0.6807	0.66393	0.03072	0.05002
QGC.Lacom11.Unk1	avgbs2_192972.1.14	0.11976	Mrg11	Chr4C	32.2	0.07926	0.94307	0.60285	0.12312	0.00023614	0.9149	0.36437	0.43481	3.5428e-06	0.3963	2.5133e-08	0.01325	0.20447	0.35467	0.69528	0.14555	0.69139	0.10345	0.1778	0.39332	0.39001	0.3461	0.10243	0.28408	0.68162	0.25543	0.04376	0.12315	0.22438	0.91542	0.23718	0.27806	0.45944	0.45846	0.13975	0.40244	0.12363	0.54759	0.03245	0.41229	0.05919	0.33838	0.11116	0.82689
QGC.Lacom11.Unk1	avgbs_cluster_16650.1.16	0.0518962	Mrg11	Chr4C	32.4	0.09653	0.88369	0.13066	0.62814	0.00023465	0.52002	0.46145	0.63012	2.5331e-05	0.72969	3.1061e-07	0.98306	0.20236	0.89008	0.59242	0.16753	0.64947	0.15597	0.51639	0.35294	0.66425	0.34103	0.20476	0.1482	0.62238	0.32827	0.19273	0.3271	0.45932	0.35455	0.97893	0.36123	0.9186	0.52221	0.14135	0.59922	0.09989	0.62259	0.24643	0.67093	0.88521	0.34633	0.17762	0.90849
QGC.Lacom11.Unk1	avgbs_11185.1.44	0.0439122	Mrg11	Chr4C	45.6	0.11047	0.46971	0.35983	0.61514	0.00029743	0.8347	0.40818	0.42651	9.8203e-05	0.71791	2.9164e-07	0.7996	0.22303	0.43538	0.61345	0.07084	0.53696	0.07979	0.98325	0.23413	0.6165	0.12568	0.10818	0.06459	0.5005	0.15506	0.0647	0.17502	0.35436	0.47276	0.81179	0.27254	0.76572	0.29299	0.08828	0.72553	0.03587	0.01512	0.24276	0.50389	0.63648	0.37886	0.99459	0.85059
QGC.Lacom11.Unk1	avgbs2_66688.1.34	0.271457	Mrg11	Chr4C	46.5	0.12593	0.6645	0.3246	0.58318	0.00051171	0.52502	0.38673	0.72544	3.3837e-05	0.52351	3.4181e-07	0.7263	0.32992	0.82662	0.33501	0.07917	0.6252	0.06645	0.53549	0.23869	0.04593	0.17943	0.11354	0.2792	0.63051	0.20675	0.21313	0.21553	0.102	0.87454	0.53993	0.24377	0.04415	0.28826	0.0115	0.63735	0.0348	0.22575	0.00302	0.10481	0.14268	0.10218	0.83631	0.89398
QGC.Lacom11.Unk1	avgbs2_105173.1.49	0.0479042	Mrg11	Chr4C	48.8	0.02477	0.62617	0.21786	0.14367	0.00013327	0.92024	0.50348	0.79498	0.00017935	0.1397	1.9507e-07	0.45047	0.52297	0.37835	0.70129	0.07992	0.30484	0.06536	0.38135	0.16075	0.41354	0.176	0.11154	0.27751	0.48877	0.17371	0.13486	0.22365	0.0347	0.91819	0.18586	0.10744	0.43793	0.38198	0.0769	0.64266	0.09242	0.0242	0.06789	0.71302	0.32963	0.18098	0.97971	0.11937
QGC.Lacom11.Unk1	avgbs_cluster_11203.1.24	0.0578842	Mrg11	Chr4C	48.8	0.07298	0.81307	0.28136	0.61611	0.00056519	0.73413	0.64629	0.64675	4.7734e-05	0.60251	2.7711e-07	0.89727	0.38536	0.41401	0.35166	0.08441	0.33267	0.06752	0.16033	0.15758	0.16576	0.18991	0.10914	0.10969	0.68494	0.24726	0.11465	0.13015	0.04195	0.65746	0.05031	0.08046	0.15082	0.28084	0.06199	0.68076	0.05405	0.05093	0.02166	0.52949	0.02545	0.13851	0.91921	0.65952
QGC.Lacom11.Unk1	avgbs2_69470.1.50	0.0578842	Mrg11	Chr4C	48.8	0.04549	0.71376	0.33899	0.32004	0.00017218	0.35306	0.63991	0.68024	8.3724e-05	0.68544	3.2357e-07	0.69631	0.54083	0.91278	0.61757	0.19958	0.12233	0.13579	0.5011	0.31393	0.17676	0.22693	0.17232	0.50922	0.72046	0.34207	0.19242	0.24706	0.08853	0.66876	0.18908	0.06503	0.13254	0.27126	0.0403	0.48143	0.05122	0.10922	0.01813	0.59264	0.07413	0.1832	0.9668	0.79431
QGC.Lacom11.Unk1	avgbs_cluster_31914.1.16	0.0798403	Mrg11	Chr4C	48.8	0.1181	0.95287	0.37896	0.66668	0.0003922	0.98853	0.44269	0.85465	3.0206e-05	0.61309	4.5158e-07	0.87171	0.59819	0.7632	0.58263	0.11315	0.11901	0.12455	0.44491	0.24358	0.12871	0.17092	0.09839	0.63235	0.62056	0.34323	0.10439	0.16545	0.02692	0.83082	0.08397	0.07562	0.13364	0.22749	0.0009437	0.67724	0.01368	0.00035792	0.00287	0.16328	0.00491	0.06078	0.9736	0.79555
QGC.Lacom11.Unk1	avgbs_20039.1.33	0.0858283	Mrg11	Chr4C	48.8	0.10513	0.38283	0.42274	0.63619	0.00028204	0.89863	0.20433	0.86058	3.4665e-05	0.6807	2.9285e-07	0.88343	0.58916	0.63991	0.53364	0.08116	0.20565	0.10736	0.34148	0.13466	0.12585	0.06462	0.06585	0.28275	0.67752	0.37164	0.04408	0.10303	0.0068	0.32551	0.08914	0.01335	0.10035	0.06884	0.04784	0.62909	0.05699	0.00733	0.07456	0.34973	0.13127	0.16971	0.93844	0.86645
QGC.Lacom11.Unk1	avgbs_103461.1.42	0.117764	Mrg11	Chr4C	51.4	0.0486	0.44348	0.54817	0.12684	0.0001194	0.49002	0.63397	0.37295	1.3355e-05	0.29935	5.3885e-07	0.71434	0.20031	0.83022	0.59382	0.11639	0.40229	0.09708	0.68493	0.26268	0.60941	0.17781	0.14876	0.63045	0.54442	0.26837	0.13103	0.18967	0.18421	0.27906	0.56385	0.2751	0.64571	0.51517	0.14106	0.73745	0.08032	0.40534	0.26853	0.74708	0.57575	0.54868	0.67087	0.53995
QGC.Lacom11.Unk1	avgbs_35543.1.21	0.0439122	Mrg11	Chr4C	52.8	0.07264	0.69235	0.47012	0.61673	8.6359e-05	0.83849	0.57838	0.81397	4.9484e-05	0.65805	9.4937e-07	0.8434	0.54155	0.82732	0.53329	0.15081	0.50246	0.12752	0.97572	0.38093	0.44766	0.26456	0.13876	0.02227	0.52725	0.22623	0.09843	0.25195	0.3236	0.70074	0.11394	0.06287	0.20789	0.28421	0.12351	0.67727	0.079	0.02062	0.30335	0.90763	0.37381	0.56754	0.8468	0.33194
QGC.Lacom11.Unk1	avgbs_cluster_13747.1.7	0.0618762	Mrg11	Chr4C	52.8	0.03838	0.95873	0.31771	0.20506	0.0003231	0.58767	0.26048	0.71653	9.0963e-05	0.75544	5.9568e-07	0.22482	0.48657	0.94772	0.3478	0.15477	0.37586	0.12217	0.40981	0.38825	0.35374	0.27161	0.19785	0.13491	0.66834	0.26097	0.19901	0.38412	0.37187	0.94742	0.22634	0.32074	0.27573	0.43376	0.16235	0.52717	0.06594	0.42145	0.2753	0.48373	0.08277	0.51704	0.81728	0.61648
QGC.Lacom11.Unk1	avgbs2_53233.1.36	0.0758483	Mrg11	Chr4C	52.8	0.08257	0.61383	0.54597	0.35359	0.00026825	0.29013	0.47919	0.65489	3.0487e-05	0.32013	6.285e-07	0.18003	0.43562	0.39762	0.62392	0.15566	0.41529	0.08815	0.15291	0.33113	0.26749	0.23755	0.20239	0.28358	0.68134	0.31759	0.17282	0.35992	0.08103	0.605	0.15392	0.26174	0.41878	0.44818	0.05231	0.66398	0.04311	0.20134	0.06802	0.68962	0.0834	0.244	0.87786	0.73514
QGC.Lacom11.Unk1	avgbs_cluster_16662.1.11	0.101796	Mrg11	Chr4C	52.8	0.06349	0.82467	0.42024	0.21968	7.0077e-05	0.40324	0.28718	0.48366	1.6501e-05	0.52632	2.2569e-07	0.1037	0.3566	0.34153	0.54323	0.13503	0.68922	0.06457	0.7931	0.46246	0.98591	0.23497	0.18343	0.68009	0.49811	0.19686	0.20612	0.37522	0.35613	0.95438	0.79759	0.39859	0.94509	0.38313	0.16452	0.66341	0.03941	0.64607	0.28307	0.66767	0.48379	0.6177	0.80599	0.86937
QGC.Lacom11.Unk1	avgbs_cluster_35642.1.35	0.101796	Mrg11	Chr4C	52.8	0.0599	0.94693	0.35915	0.16454	0.00030886	0.273	0.32443	0.78208	4.6395e-05	0.54222	9.4134e-07	0.68993	0.54134	0.51675	0.7069	0.14099	0.49722	0.08254	0.34554	0.40196	0.42334	0.26791	0.17365	0.38423	0.64212	0.30881	0.23085	0.35264	0.24035	0.52622	0.42171	0.28551	0.47339	0.28879	0.08885	0.70076	0.04517	0.29374	0.22953	0.77708	0.90629	0.4887	0.82848	0.79642
QGC.Lacom11.Unk1	avgbs2_194578.1.43	0.117764	Mrg11	Chr4C	52.8	0.04358	0.99202	0.53543	0.07085	0.00042439	0.42033	0.27773	0.68284	7.9887e-05	0.63443	4.7571e-07	0.49207	0.42791	0.16768	0.71589	0.10737	0.6916	0.05322	0.98098	0.38117	0.6426	0.25307	0.17915	0.63748	0.63154	0.23241	0.15799	0.3163	0.47072	0.7355	0.85712	0.38228	0.63515	0.44124	0.16827	0.6324	0.08284	0.59991	0.14961	0.48176	0.82219	0.558	0.99903	0.64693
QGC.Lacom11.Unk1	avgbs_cluster_14895.1.22	0.133733	Mrg11	Chr4C	52.8	0.01598	0.87488	0.49005	0.02701	0.00022965	0.15956	0.0917	0.63559	2.5315e-05	0.58425	1.8501e-07	0.24605	0.32638	0.48203	0.58758	0.18316	0.67241	0.16717	0.79941	0.42832	0.892	0.36864	0.18163	0.40535	0.63035	0.1705	0.17536	0.26468	0.41468	0.83292	0.36583	0.30421	0.81869	0.53467	0.16768	0.63734	0.10155	0.5509	0.29071	0.87025	0.42145	0.61726	0.96783	0.91134
QGC.Lacom11.Unk1	avgbs2_118430.1.33	0.147705	Mrg11	Chr4C	52.8	0.22575	0.5525	0.55378	0.3225	0.00322	0.85364	0.78161	0.26735	0.00572	0.11748	7.819e-07	0.07688	0.40986	0.46477	0.49999	0.6202	0.75355	0.23602	0.43404	0.62726	0.78614	0.84299	0.57059	0.32692	0.44415	0.46389	0.30731	0.56418	0.37108	0.63603	0.63427	0.55592	0.7131	0.8195	0.50323	0.64142	0.22022	0.82501	0.26232	0.80232	0.75234	0.63786	0.96177	0.49188
QGC.Lacom11.Unk1	avgbs_cluster_11877.1.63	0.149701	Mrg11	Chr4C	52.8	0.14269	0.8209	0.73266	0.233	0.00046567	0.71888	0.67011	0.86578	0.00011427	0.76777	9.452e-07	0.70773	0.61765	0.68254	0.60593	0.15834	0.65207	0.11171	0.71178	0.48971	0.47387	0.31939	0.20506	0.49615	0.61559	0.30911	0.19053	0.37381	0.40586	0.69357	0.92996	0.42256	0.55064	0.48988	0.24554	0.52514	0.07568	0.58766	0.41363	0.83372	0.8946	0.83111	0.9843	0.71517
QGC.Lacom11.Unk1	avgbs_cluster_34963.1.31	0.149701	Mrg11	Chr4C	52.8	0.05743	0.98593	0.5054	0.09156	0.00013497	0.4472	0.59225	0.87676	3.9177e-05	0.50819	5.7498e-08	0.41211	0.51603	0.53991	0.52294	0.08519	0.74619	0.03811	0.54419	0.32011	0.9092	0.18409	0.09988	0.12699	0.58115	0.14803	0.08068	0.20992	0.24315	0.57367	0.38134	0.28905	0.81836	0.34879	0.2206	0.85301	0.11235	0.47123	0.34057	0.69818	0.65818	0.62073	0.83587	0.80251
QGC.Lacom11.Unk1	avgbs2_85064.1.29	0.151697	Mrg11	Chr4C	52.8	0.03913	0.95131	0.58341	0.08577	0.00018412	0.66019	0.28324	0.66385	6.7509e-05	0.66085	9.0539e-07	0.80703	0.45517	0.53486	0.51046	0.12292	0.66522	0.11311	0.55749	0.37507	0.49904	0.24926	0.18614	0.62202	0.66698	0.25991	0.18483	0.40465	0.4313	0.4274	0.84047	0.34257	0.43603	0.39047	0.17354	0.59137	0.08606	0.56571	0.19095	0.91866	0.59436	0.52685	0.97086	0.89013
QGC.Lacom11.Unk1	avgbs_99243.1.39	0.161677	Mrg11	Chr4C	52.8	0.0595	0.95087	0.57977	0.07815	0.00028774	0.45068	0.26832	0.68238	5.5111e-05	0.65648	2.004e-07	0.30367	0.43508	0.44185	0.58653	0.18775	0.64642	0.07079	0.5351	0.53023	0.93956	0.36306	0.23754	0.48383	0.53677	0.20201	0.22272	0.41701	0.57326	0.55811	0.53803	0.4616	0.87008	0.47582	0.24782	0.66734	0.10807	0.69529	0.33472	0.92845	0.38369	0.72905	0.96567	0.83052
QGC.Lacom11.Unk1	avgbs_cluster_35690.1.37	0.139721	Mrg11	Chr4C	52.9	0.02557	0.97405	0.55238	0.03587	0.00016099	0.4625	0.25798	0.73483	3.1023e-05	0.50575	3.4327e-07	0.8902	0.31308	0.85865	0.5939	0.04139	0.78216	0.01495	0.75913	0.19508	0.57301	0.07921	0.0634	0.19306	0.61586	0.06522	0.08246	0.19484	0.18955	0.63313	0.35995	0.0941	0.30827	0.22974	0.12569	0.6112	0.06986	0.25307	0.16829	0.64793	0.88423	0.45679	0.90907	0.34069
QGC.Lacom11.Unk1	avgbs2_51788.1.27	0.0379242	Mrg11	Chr4C	54	0.00931	0.96183	0.13728	0.53668	2.0185e-05	0.01152	0.21799	0.06765	5.8378e-05	0.03203	1.635e-07	0.1392	0.0779	0.07571	0.47035	0.13746	0.38447	0.0677	0.38397	0.46047	0.22978	0.20227	0.17786	0.2872	0.28186	0.16587	0.18447	0.32821	0.41414	0.93688	0.09608	0.38969	0.08476	0.25174	0.14128	0.37884	0.07378	0.18588	0.31553	0.53819	0.35772	0.48251	0.47377	0.90128
QGC.Lacom11.Unk1	avgbs2_195201.1.41	0.0459082	Mrg11	Chr4C	54	0.05037	0.08728	0.42427	0.16748	7.2628e-05	0.74321	0.40904	0.40741	5.3474e-06	0.46754	9.9415e-08	0.02866	0.22754	0.46196	0.76812	0.15431	0.51601	0.04418	0.59574	0.31267	0.98265	0.29796	0.11644	0.37261	0.56824	0.14752	0.14899	0.06553	0.27662	0.01619	0.6349	0.24069	0.75488	0.38114	0.20605	0.44193	0.08402	0.64588	0.27944	0.93006	0.57578	0.64143	0.53161	0.76985
QGC.Lacom11.Unk1	avgbs2_162928.1.52	0.0878244	Mrg11	Chr4C	54	0.03694	0.71716	0.5072	0.43649	0.00014732	0.16	0.17969	0.58041	1.9217e-05	0.4699	2.9357e-07	0.77763	0.35373	0.49896	0.54493	0.09504	0.66984	0.12484	0.48138	0.43152	0.09912	0.24164	0.10529	0.70286	0.61863	0.27273	0.28687	0.25391	0.33464	0.65342	0.97301	0.35791	0.17755	0.46216	0.12372	0.62898	0.09431	0.66904	0.25822	0.65656	0.78642	0.44932	0.84036	0.22247
QGC.Lacom11.Unk1	avgbs_86218.1.19	0.141717	Mrg11	Chr4C	54	0.03483	0.88633	0.35174	0.26926	0.00010267	0.29926	0.46895	0.58489	4.1294e-05	0.72057	3.0469e-07	0.5548	0.44748	0.84335	0.56491	0.1493	0.56421	0.13053	0.51905	0.42013	0.78969	0.2175	0.1761	0.68175	0.54433	0.37795	0.17759	0.17241	0.49694	0.66249	0.40976	0.42484	0.7383	0.34567	0.18861	0.29114	0.07099	0.59846	0.23987	0.61432	0.68821	0.53641	0.70871	0.78979
QGC.Lacom11.Unk1	avgbs_cluster_34961.1.64	0.0678643	Mrg11	Chr4C	68.6	0.0061	0.72143	0.1262	0.39533	1.5835e-05	0.52551	0.54859	0.04262	6.1401e-05	0.01745	3.7119e-08	0.32703	0.06425	0.09665	0.25575	0.19492	0.3062	0.15413	0.61547	0.50251	0.77713	0.14746	0.32435	0.42589	0.10207	0.3432	0.21818	0.21292	0.13414	0.44377	0.35451	0.25768	0.43893	0.29661	0.06267	0.3833	0.09694	0.07187	0.14454	0.36367	0.76159	0.22807	0.12077	0.54892
QGC.Lacom11.Unk1	avgbs_62437.1.46	0.121756	Mrg11	Chr4C	68.6	0.04536	0.96242	0.57038	0.33157	0.00019068	0.25949	0.25268	0.55428	7.8857e-05	0.69312	5.7896e-07	0.95692	0.41394	0.84029	0.59704	0.15642	0.65265	0.16423	0.94229	0.45432	0.37929	0.35453	0.2022	0.67087	0.67969	0.43788	0.23384	0.2143	0.40061	0.78838	0.73542	0.44343	0.50196	0.56028	0.17108	0.52806	0.09157	0.65681	0.31306	0.33716	0.8578	0.71962	0.8426	0.66225
QGC.Lacom11.Unk1	avgbs_cluster_3321.1.50	0.195609	Mrg11	Chr4C	69.3	0.0678	0.94792	0.4102	0.23153	0.00012607	0.67779	0.41263	0.78939	3.2772e-05	0.75022	7.8533e-07	0.80898	0.53518	0.711	0.50109	0.05756	0.07211	0.119	0.18194	0.37037	0.16177	0.03693	0.05672	0.38294	0.59758	0.12122	0.22232	0.21775	0.19124	0.7411	0.09154	0.13065	0.08609	0.06136	0.03016	0.37722	0.03968	0.03371	0.08215	0.18368	0.30637	0.37005	0.99824	0.91737
QGC.Lacom11.Unk1	avgbs_cluster_35092.1.7	0.189621	Mrg21	Chr4D	158.4	0.09671	0.85929	0.58322	0.70475	0.00013735	0.56375	0.18615	0.67478	1.7954e-05	0.67774	1.6192e-07	0.61957	0.30722	0.80753	0.62974	0.04463	0.53802	0.02269	0.38321	0.16384	0.07549	0.05207	0.17001	0.46812	0.58779	0.16668	0.112	0.42257	0.23291	0.94808	0.65281	0.28745	0.02512	0.0587	0.08149	0.62764	0.04112	0.2279	0.31147	0.14813	0.54979	0.22457	0.9084	0.89194
QGC.Lacom11.Unk1	avgbs_cluster_54094.2.31	0.159681	Mrg21	Chr4D	172	0.03712	0.93124	0.17095	0.36137	9.4265e-05	0.06924	0.46234	0.24892	5.2934e-06	0.56572	4.2857e-07	0.09281	0.23446	0.10056	0.71687	0.08045	0.64971	0.07138	0.58477	0.2085	0.53951	0.19751	0.11949	0.41167	0.34361	0.22516	0.12119	0.13081	0.13394	0.05774	0.66819	0.17952	0.81799	0.42502	0.04455	0.65209	0.02717	0.22451	0.05318	0.13739	0.60625	0.36784	0.86537	0.67171
QGC.Lacom11.Unk1	avgbs2_82089.1.51	0.145709	Mrg21	Chr4D	173	0.01138	0.91063	0.05886	0.15681	0.00055082	0.02528	0.06623	0.56856	9.9335e-06	0.77498	3.3027e-07	0.19353	0.37738	0.77713	0.47889	0.27972	0.36523	0.31133	0.3029	0.61391	0.20591	0.44746	0.50545	0.58643	0.58975	0.42867	0.30184	0.45725	0.62268	0.01951	0.97703	0.65964	0.40332	0.51061	0.44556	0.49205	0.18299	0.66704	0.39382	0.42417	0.93888	0.91889	0.95962	0.24569
QGC.Lacom11.Unk1	avgbs2_196512.1.14	0.205589	Mrg21	Chr4D	174.1	0.09687	0.65517	0.33623	0.45707	0.00043428	0.72063	0.55129	0.68496	0.00025253	0.67495	4.0814e-07	0.49378	0.47023	0.4985	0.3011	0.21165	0.4386	0.02449	0.71654	0.43865	0.44837	0.31624	0.30135	0.6458	0.27185	0.17913	0.24713	0.33067	0.36002	0.20158	0.62028	0.40806	0.19998	0.41716	0.16118	0.58123	0.04314	0.59788	0.05455	0.93182	0.96205	0.42794	0.73285	0.83969
QGC.Lacom11.Unk1	avgbs2_173511.1.8	0.133733	Mrg21	Chr4D	174.7	0.07733	0.90287	0.59393	0.53104	0.00024016	0.42708	0.52094	0.20024	6.0022e-06	0.52787	8.4639e-07	0.0732	0.15222	0.36694	0.24777	0.16847	0.46065	0.08981	0.67663	0.41866	0.75618	0.29922	0.21912	0.6778	0.16954	0.25517	0.22788	0.17783	0.36681	0.30592	0.91511	0.29962	0.57847	0.41719	0.17251	0.61282	0.09414	0.6515	0.28196	0.11672	0.76316	0.601	0.45266	0.94554
QGC.Lacom11.Unk1	avgbs_cluster_6386.1.26	0.129741	Mrg21	Chr4D	175.3	0.01943	0.57645	0.02183	0.0585	0.00022047	0.13751	0.51623	0.39457	2.0607e-05	0.0625	1.246e-07	0.64223	0.42875	0.74355	0.14331	0.10651	0.48386	0.03825	0.79107	0.15165	0.65463	0.11173	0.10718	0.41297	0.10139	0.20624	0.09794	0.2305	0.19897	0.06995	0.41829	0.10834	0.91238	0.18497	0.09067	0.51397	0.0794	0.21698	0.14339	0.93383	0.31493	0.12237	0.25992	0.86295
QGC.Lacom11.Unk1	avgbs_27211.1.8	0.195609	Mrg21	Chr4D	181.1	0.0415	0.96113	0.61283	0.61124	2.0676e-05	0.27985	0.09891	0.82228	1.5929e-05	0.41654	7.8265e-07	0.73526	0.45243	0.75392	0.44897	0.02848	0.62163	0.05121	0.11248	0.24499	0.04994	0.07864	0.05984	0.35814	0.58935	0.07698	0.09027	0.17505	0.22859	0.07036	0.69578	0.18366	0.04015	0.25022	0.02053	0.62753	0.01139	0.2785	0.19714	0.26886	0.50328	0.3159	0.7003	0.68729
QGC.Lacom11.Unk1	avgbs_72419.1.56	0.239521	Mrg21	Chr4D	181.1	0.04874	0.77226	0.16202	0.54162	0.00015701	0.29358	0.33993	0.32835	1.4024e-05	0.58194	9.4848e-07	0.14409	0.20303	0.7075	0.63353	0.06254	0.59242	0.06007	0.06518	0.25747	0.20813	0.20079	0.05971	0.66188	0.68052	0.13289	0.05514	0.03325	0.28111	0.54699	0.12396	0.17343	0.212	0.34177	0.09719	0.05814	0.02836	0.44868	0.06728	0.3515	0.59333	0.55151	0.66193	0.82394
QGC.Lacom11.Unk1	avgbs2_59348.1.60	0.259481	Mrg21	Chr4D	181.1	0.06315	0.99373	0.3239	0.56633	0.00011078	0.19712	0.37981	0.50271	7.4134e-06	0.31096	4.5076e-08	0.63374	0.25477	0.98737	0.36571	0.07583	0.52105	0.02152	0.94654	0.18876	0.12697	0.15082	0.1152	0.53007	0.62135	0.05062	0.13379	0.16681	0.12785	0.84739	0.96196	0.23244	0.24972	0.33218	0.05647	0.94461	0.03116	0.28053	0.03834	0.9556	0.92123	0.23877	0.79711	0.9237
QGC.Lacom11.Unk1	avgbs_21101.1.38	0.329341	Mrg21	Chr4D	181.1	0.0835	0.94012	0.55267	0.65963	0.00022352	0.4077	0.44686	0.50845	9.1791e-05	0.42582	2.935e-07	0.02905	0.33984	0.38977	0.59884	0.23129	0.635	0.13068	0.73822	0.50038	0.96686	0.36767	0.28002	0.65551	0.57602	0.30724	0.17794	0.36294	0.30764	0.64674	0.77335	0.43918	0.92823	0.44927	0.21304	0.30643	0.09111	0.65828	0.17297	0.81679	0.55859	0.53023	0.79872	0.57579
QGC.Lacom11.Unk1	avgbs_cluster_8535.1.25	0.147705	Mrg21	Chr4D	197.1	0.07697	0.29028	0.44957	0.58109	0.00015929	0.04309	0.38116	0.48146	2.7846e-05	0.53448	3.8616e-08	0.1982	0.20777	0.55938	0.58299	0.05104	0.68599	0.0726	0.10817	0.16189	0.78127	0.18839	0.0616	0.59124	0.51166	0.25172	0.10899	0.09139	0.0792	0.75402	0.00521	0.19971	0.52735	0.31747	0.10872	0.29879	0.04667	0.60843	0.22214	0.68336	0.11676	0.25613	0.98026	0.94345
QGC.Lacom11.Unk1	avgbs2_45754.1.25	0.171657	Mrg21	Chr4D	197.1	0.07688	0.23943	0.37246	0.56904	0.00012346	0.0296	0.35798	0.00052385	3.1496e-05	0.55155	2.1499e-08	0.51363	0.00015102	0.49001	0.23054	0.00205	0.75099	0.00907	0.00105	0.01672	0.05516	0.04751	0.00202	0.61651	0.38528	0.1021	0.02565	0.01242	0.00115	0.54774	3.3077e-05	0.01311	0.0392	0.06381	0.01514	0.09603	0.00452	0.47932	0.1115	0.82809	0.00202	0.02119	0.11253	0.7945
QGC.Lacom11.Unk1	avgbs2_9745.1.47	0.125749	Mrg21	Chr4D	198.4	0.00957	0.62362	0.46886	0.23471	4.9969e-05	0.0021	0.43291	0.06707	1.8356e-05	0.24218	2.127e-08	0.09879	0.08427	0.19333	0.76595	0.12153	0.24684	0.0865	0.49019	0.31719	0.65552	0.2355	0.09649	0.44898	0.39759	0.18994	0.08321	0.165	0.11678	0.32917	0.21095	0.18822	0.8326	0.34594	0.1118	0.08826	0.01502	0.12863	0.20019	0.23549	0.23255	0.36367	0.00541	0.42067
QGC.Lacom11.Unk1	avgbs_cluster_6219.1.34	0.189621	Mrg21	Chr4D	199.1	0.12122	0.57358	0.48313	0.63125	0.00030537	0.14331	0.39828	0.00024634	4.987e-05	0.64076	2.593e-07	0.51232	9.9797e-05	0.33058	0.48245	0.00223	0.43715	0.00607	0.00316	0.0232	0.01723	0.02662	0.00198	0.65167	0.19666	0.04153	0.0235	0.02653	0.00080123	0.76436	5.617e-05	0.02072	0.01255	0.03664	0.00984	0.02883	0.0019	0.20418	0.12703	0.63852	0.00152	0.01943	0.05125	0.75207
QGC.Lacom11.Unk1	avgbs2_9745.1.62	0.103792	Mrg21	Chr4D	199.4	0.01347	0.42091	0.31424	0.29831	0.00011436	0.00457	0.62159	0.13442	3.5417e-05	0.34649	2.0677e-08	0.18293	0.13291	0.16057	0.7684	0.13061	0.48212	0.09561	0.92845	0.30447	0.47369	0.23364	0.14016	0.57656	0.14227	0.20711	0.11687	0.27537	0.16113	0.56368	0.47201	0.27491	0.565	0.39402	0.1875	0.04158	0.03425	0.29247	0.34975	0.09181	0.74723	0.57373	0.01461	0.72456
QGC.Lacom11.Unk1	avgbs_cluster_13993.1.34	0.0499002	Mrg24	Chr5A	41.8	0.05619	0.23733	0.64896	0.41508	0.00014503	0.578	0.50486	0.5165	1.4884e-05	0.26279	6.4938e-07	0.10181	0.22147	0.52055	0.26749	0.00030865	0.09124	0.00077963	0.00054659	0.00010817	0.09124	0.00492	0.00873	0.18948	0.36043	0.02455	0.0036	0.00638	0.08025	8.7481e-05	0.03753	0.00214	0.22772	0.12782	0.04319	0.1048	0.01568	0.03867	0.23914	0.57097	0.13291	0.07349	0.88085	0.95068
QGC.Lacom11.Unk1	avgbs2_186303.1.12	0.0419162	Mrg03	Chr5C	40.3	0.14477	0.95308	0.65712	0.53558	0.00059204	0.56449	0.53256	0.44084	0.00017239	0.65662	1.9652e-07	0.55776	0.41	0.2354	0.29042	0.31816	0.42254	0.29655	0.94006	0.44012	0.56525	0.22568	0.20423	0.33869	0.46127	0.46306	0.18229	0.39027	0.25204	0.95017	0.30271	0.29392	0.34921	0.16042	0.40596	0.12053	0.06609	0.14979	0.36949	0.40265	0.64825	0.76338	0.73698	0.46636
QGC.Lacom11.Unk1	avgbs_cluster_11118.1.29	0.251497	Mrg03	Chr5C	73.1	0.17632	0.47394	0.76798	0.4172	0.00040283	0.94697	0.63061	0.75484	0.00014705	0.55214	9.116e-07	0.58587	0.45264	0.69476	0.23155	0.17976	0.74812	0.13721	0.68795	0.37364	0.26083	0.25112	0.17146	0.67055	0.60809	0.33338	0.11268	0.14521	0.33404	0.89365	0.96543	0.35339	0.23999	0.3408	0.12957	0.80138	0.0556	0.36933	0.21305	0.66659	0.51193	0.43956	0.86479	0.84562
QGC.Lacom11.Unk1	avgbs_46839.1.60	0.0738523	Mrg03	Chr5C	129.2	0.00047968	0.85812	0.03116	0.007	5.9646e-05	0.13529	0.59576	0.44859	2.8998e-05	0.5518	4.1641e-08	0.76489	0.31162	0.8179	0.22023	0.0197	0.83167	0.00952	0.123	0.02696	0.24082	0.08051	0.04951	0.06633	0.76575	0.00631	0.03409	0.05568	0.49409	0.06834	0.52298	0.0317	0.11652	0.04964	0.00312	0.16792	0.00403	0.50017	0.10225	0.00448	0.04323	0.00739	0.94951	0.03699
QGC.Lacom11.Unk1	avgbs_cluster_50784.1.28	0.173653	Mrg06	Chr5D	51.3	0.10594	0.85889	0.40215	0.6246	0.00030901	0.73997	0.5075	0.00112	7.8444e-05	0.54039	4.9598e-07	0.32086	0.00316	0.38776	0.54334	0.00794	0.2342	0.12644	0.03767	0.06084	0.89107	0.02821	0.16553	0.28698	0.08939	0.30564	0.14417	0.23952	0.97848	0.94306	0.16923	0.11072	0.96448	0.15359	0.31796	0.50839	0.08684	0.80734	0.68878	0.348	0.26813	0.26164	0.14442	0.62549
QGC.Lacom11.Unk1	avgbs2_124085.1.19	0.175649	Mrg06	Chr5D	55.6	0.0797	0.9331	0.23412	0.53735	0.0004041	0.45301	0.5627	0.58593	4.2226e-05	0.5686	3.7781e-08	0.90295	0.34043	0.64337	0.62668	0.23797	0.76021	0.13882	0.82278	0.41851	0.8888	0.38466	0.34006	0.15241	0.70242	0.26213	0.20641	0.42626	0.37099	0.40761	0.44661	0.52301	0.75162	0.50571	0.19335	0.58298	0.0935	0.62413	0.21124	0.62978	0.90171	0.63309	0.94636	0.61051
QGC.Lacom11.Unk1	avgbs2_99800.1.20	0.165669	Mrg06	Chr5D	59.6	0.14018	0.49132	0.6377	0.45428	0.00038592	0.7048	0.61949	0.60236	2.5474e-05	0.2811	5.5536e-07	0.96085	0.41026	0.49853	0.51197	0.2568	0.38774	0.15696	0.73467	0.56068	0.98421	0.36631	0.28677	0.20081	0.58718	0.33095	0.14739	0.28083	0.57232	0.59754	0.66197	0.37636	0.92045	0.41283	0.08378	0.6726	0.13305	0.41943	0.13652	0.6878	0.25647	0.1865	0.48444	0.83084
QGC.Lacom11.Unk1	avgbs_cluster_47663.1.58	0.257485	Mrg06	Chr5D	61.9	0.07822	0.07085	0.62182	0.63403	0.00026854	0.30213	0.31653	0.5776	2.182e-05	0.67969	2.6733e-07	0.44681	0.27359	0.71908	0.41261	0.18106	0.15493	0.13177	0.56274	0.40992	0.41766	0.22862	0.13309	0.09005	0.48119	0.2806	0.08428	0.23634	0.42859	0.9387	0.05286	0.40366	0.68141	0.3728	0.07377	0.55167	0.12275	0.21194	0.15672	0.53565	0.08073	0.34402	0.97468	0.38868
QGC.Lacom11.Unk1	avgbs2_151330.1.8	0.371257	Mrg06	Chr5D	61.9	0.06759	0.09278	0.55907	0.53647	0.00010468	0.38136	0.38728	0.78816	3.0691e-05	0.63962	5.6392e-07	0.6067	0.60943	0.78183	0.57555	0.1807	0.23662	0.14373	0.6634	0.45417	0.51861	0.23314	0.20444	0.01424	0.62191	0.32818	0.09489	0.35483	0.35639	0.93901	0.06447	0.41683	0.71063	0.42905	0.11662	0.61999	0.08437	0.14403	0.18286	0.51983	0.1183	0.42283	0.92534	0.21139
QGC.Lacom11.Unk1	avgbs_cluster_17564.1.10	0.0259481	Mrg06	Chr5D	103	0.10271	0.94498	0.57099	0.66222	0.00019526	0.72181	0.42883	0.09408	4.4951e-06	0.38663	1.0537e-08	0.07752	0.02477	0.81404	0.42568	0.10665	0.1047	0.05914	0.66348	0.35941	0.55257	0.11287	0.11693	0.41649	0.25309	0.0583	0.12278	0.10074	0.21496	0.43351	0.49775	0.31649	0.38672	0.2319	0.06546	0.15647	0.06568	0.57046	0.17235	0.02437	0.53212	0.41751	0.0183	0.24765
QGC.Lacom11.Unk1	avgbs_cluster_21598.1.32	0.0499002	Mrg06	Chr5D	113.7	0.08931	0.38224	0.65268	0.6687	0.00015316	0.47002	0.50158	0.03417	6.1922e-05	0.79749	9.543e-08	0.51252	0.09454	0.97777	0.54634	0.01953	0.6215	0.0909	0.04033	0.14638	0.07307	0.13627	0.04316	0.24766	0.41317	0.32198	0.04045	0.12257	0.22638	0.94898	0.13847	0.07218	0.06869	0.14685	0.29302	0.81798	0.03388	0.94236	0.30253	0.90887	0.3381	0.40425	0.0021	0.97771
QGC.Lacom11.Unk1	avgbs2_186095.1.36	0.339321	Mrg05	Chr6A	89.4	0.05476	0.99048	0.54457	0.05259	0.00034098	0.05063	0.07249	0.39507	0.00013114	0.34563	4.6097e-07	0.85371	0.27224	0.87678	0.16783	0.09518	0.57814	0.09067	0.55012	0.4163	0.714	0.1485	0.17962	0.12699	0.25532	0.24686	0.12755	0.29548	0.23175	0.42056	0.89857	0.43589	0.88626	0.23773	0.11932	0.45113	0.08635	0.13102	0.09979	0.78865	0.36331	0.4358	0.61449	0.88057
QGC.Lacom11.Unk1	avgbs2_195343.1.21	0.331337	Mrg05	Chr6A	98.7	0.10983	0.77286	0.61679	0.18548	0.00021638	0.42884	0.60984	0.83932	6.4314e-05	0.0481	2.8475e-07	0.60863	0.55107	0.49912	0.6529	0.11625	0.67588	0.12085	0.30733	0.37343	0.81795	0.27301	0.16757	0.26643	0.70202	0.32906	0.16194	0.16202	0.51115	0.9551	0.48033	0.33046	0.78774	0.49389	0.11794	0.20269	0.09515	0.04476	0.13169	0.44999	0.5367	0.59307	0.91659	0.97897
QGC.Lacom11.Unk1	avgbs_119774.1.39	0.265469	Mrg05	Chr6A	103.9	0.03102	0.45582	0.59031	0.08092	3.2251e-05	0.99219	0.41572	0.41879	6.8277e-05	0.03536	1.6511e-07	0.08257	0.46429	0.31006	0.32921	0.00862	0.67333	0.02451	0.02973	0.09987	0.02362	0.0542	0.01373	0.63535	0.56467	0.09846	0.0377	0.01864	0.03707	0.84395	0.04962	0.08257	0.03837	0.2106	0.0677	0.31425	0.00974	0.34585	0.18185	0.23557	0.20417	0.13926	0.14382	0.64473
QGC.Lacom11.Unk1	avgbs2_105306.2.32	0.177645	Mrg05	Chr6A	109.5	0.07405	0.83845	0.41968	0.61989	6.4193e-05	0.49228	0.52846	0.43802	0.0001575	0.14371	1.8738e-07	0.94333	0.43104	0.90808	0.41164	0.12921	0.52026	0.10503	0.71977	0.33091	0.21802	0.25181	0.10285	0.55224	0.68244	0.15994	0.18562	0.24696	0.16613	0.87842	0.76453	0.20397	0.17905	0.40439	0.19666	0.03663	0.09352	0.32148	0.20107	0.56501	0.83657	0.46946	0.73177	0.92144
QGC.Lacom11.Unk1	avgbs2_105306.2.15	0.189621	Mrg05	Chr6A	109.5	0.08896	0.99766	0.53236	0.66427	8.6442e-05	0.43998	0.53274	0.80627	0.00014033	0.22591	2.4826e-07	0.55893	0.52867	0.84183	0.59179	0.12476	0.49063	0.10713	0.62454	0.35809	0.2026	0.22748	0.11721	0.60728	0.68065	0.17716	0.18449	0.2431	0.3308	0.81122	0.91906	0.28386	0.1795	0.40015	0.19678	0.05669	0.08614	0.26553	0.18816	0.41681	0.80955	0.47901	0.8395	0.94786
QGC.Lacom11.Unk1	avgbs_25349.1.49	0.229541	Mrg05	Chr6A	111.3	0.05542	0.35794	0.25555	0.1614	0.00012003	0.14912	0.52858	0.52823	1.3958e-05	0.27223	3.3507e-07	0.11017	0.22583	0.04355	0.235	0.13683	0.75566	0.06611	0.82988	0.36267	0.65479	0.2206	0.20442	0.5783	0.59192	0.22575	0.1894	0.27892	0.42026	0.70278	0.50891	0.31476	0.74761	0.28445	0.15425	0.44875	0.04226	0.34302	0.27473	0.77843	0.54448	0.56601	0.93535	0.41289
QGC.Lacom11.Unk1	avgbs2_87435.1.63	0.115768	Mrg05	Chr6A	112.4	0.00889	0.95414	0.04974	0.00956	0.00017792	0.05771	0.49226	0.70987	7.4553e-05	0.75058	1.6633e-07	0.71354	0.42777	0.11053	0.39917	0.23584	0.51328	0.07397	0.8907	0.43906	0.76907	0.22572	0.21053	0.37882	0.5777	0.08267	0.16662	0.11876	0.49775	0.72407	0.72193	0.3692	0.5262	0.20096	0.18559	0.24131	0.04559	0.58971	0.24893	0.16428	0.47334	0.40139	0.79054	0.82552
QGC.Lacom11.Unk1	avgbs_58065.1.55	0.239521	Mrg05	Chr6A	114.7	0.09855	0.91906	0.69467	0.00224	0.00017511	0.07881	0.61208	0.56617	3.7736e-05	0.5584	1.5555e-07	0.40294	0.20114	0.10637	0.66839	0.10763	0.64228	0.06939	0.32594	0.293	0.58426	0.10906	0.12503	0.37222	0.39011	0.12353	0.10346	0.19367	0.30808	0.98535	0.80813	0.23021	0.76801	0.0898	0.12186	0.86774	0.03462	0.44215	0.17024	0.41722	0.24483	0.58986	0.89882	0.77196
QGC.Lacom11.Unk1	avgbs_cluster_39174.1.31	0.311377	Mrg05	Chr6A	114.7	0.04336	0.77462	0.49373	0.00144	0.00023703	0.10691	0.41364	0.50347	2.6692e-05	0.69743	2.9313e-07	0.70903	0.27982	0.48476	0.17454	0.13469	0.63434	0.07412	0.6402	0.39124	0.96653	0.08971	0.11356	0.19962	0.38776	0.15633	0.14573	0.25508	0.27071	0.88738	0.52908	0.27389	0.75053	0.01367	0.17945	0.59037	0.08654	0.65508	0.18618	0.90757	0.7255	0.64239	0.41006	0.82616
QGC.Lacom11.Unk1	avgbs_cluster_12403.1.26	0.361277	Mrg17	Chr6C	56.5	0.05333	0.89315	0.30811	0.22391	0.0001928	0.8095	0.19782	0.27022	4.7475e-05	0.29441	1.659e-07	0.91834	0.18921	0.25398	0.73127	0.09613	0.46462	0.08848	0.3727	0.2297	0.41497	0.22095	0.22771	0.50328	0.57889	0.38203	0.13574	0.34124	0.52674	0.78348	0.31501	0.33104	0.50536	0.35564	0.11665	0.64747	0.04782	0.57939	0.24109	0.15351	0.69339	0.45497	0.63582	0.6851
QGC.Lacom11.Unk1	avgbs_862.1.59	0.0658683	Mrg17	Chr6C	86.6	0.10655	0.65001	0.02252	0.2164	0.00647	0.85184	0.99771	0.04819	0.00204	0.04857	1.2189e-08	0.01955	0.08299	0.22072	0.2596	0.95746	0.71663	0.89199	0.43783	0.86847	0.70309	0.8533	0.98548	0.59703	0.4908	0.81118	0.62329	0.84211	0.60061	0.9466	0.70117	0.9547	0.51528	0.92127	0.67603	0.84097	0.32026	0.60718	0.45921	0.63119	0.57126	0.74832	0.53643	0.68244
QGC.Lacom11.Unk1	avgbs2_149369.1.27	0.0798403	Mrg09	Chr7C	73.5	0.07196	0.78279	0.30886	0.56861	0.0004488	0.19443	0.55207	0.89711	5.2976e-05	0.67618	7.3811e-07	0.54274	0.67176	0.94933	0.31155	0.18324	0.72078	0.14252	0.86744	0.50411	0.63831	0.35087	0.16651	0.61616	0.65939	0.31713	0.1186	0.1853	0.4573	0.9234	0.44553	0.45	0.32626	0.40569	0.18208	0.6825	0.13038	0.57748	0.12544	0.58676	0.7133	0.62172	0.89943	0.58754
QGC.Lacom11.Unk1	avgbs2_198053.1.22	0.0419162	Mrg09	Chr7C	75.9	0.09035	0.82442	0.34176	0.37605	8.7656e-05	0.27635	0.33408	0.75153	5.5228e-05	0.54791	1.0179e-07	0.26635	0.50815	0.77284	0.62482	0.04274	0.37234	0.05614	0.08799	0.17871	0.08031	0.06664	0.08336	0.46005	0.64768	0.18698	0.15261	0.08176	0.42184	0.40874	0.0179	0.0824	0.36005	0.06738	0.18624	0.56544	0.07759	0.53797	0.07389	0.0058	0.12376	0.1924	0.41188	0.84304
QGC.Lacom11.Unk1	avgbs_4990.1.22	0.0479042	Mrg09	Chr7C	75.9	0.09904	0.98571	0.60197	0.60482	0.00019234	0.46889	0.43018	0.72497	9.3825e-05	0.61783	6.3259e-07	0.27692	0.54207	0.92311	0.58401	0.18808	0.41642	0.12585	0.49441	0.43572	0.24048	0.27623	0.15711	0.5385	0.61989	0.31473	0.20392	0.14375	0.25066	0.47353	0.24309	0.21371	0.36807	0.2651	0.29184	0.58891	0.12974	0.76748	0.21141	0.16481	0.38329	0.65822	0.95186	0.84573
QGC.Lacom11.Unk1	avgbs_11823.1.6	0.0718563	Mrg09	Chr7C	78.3	0.10158	0.69624	0.62879	0.59305	0.00035891	0.10421	0.51767	0.39643	7.6006e-05	0.78927	3.91e-07	0.39795	0.28652	0.73698	0.47372	0.12605	0.28743	0.14653	0.21484	0.26994	0.00307	0.10108	0.0623	0.53917	0.12664	0.27853	0.13292	0.1583	0.24876	0.87333	0.04627	0.10542	0.01325	0.06169	0.19954	0.50766	0.0993	0.60783	0.10821	0.85057	0.22124	0.57436	0.96863	0.43342
QGC.Lacom11.Unk1	avgbs_cluster_1652.1.62	0.0958084	Mrg09	Chr7C	78.3	0.10532	0.43176	0.57204	0.58187	0.00022957	0.8784	0.5491	0.74052	8.9805e-05	0.6871	5.6249e-07	0.88921	0.48918	0.5725	0.59493	0.09522	0.33146	0.09977	0.08094	0.05196	0.67182	0.39228	0.18246	0.68968	0.52879	0.40855	0.08938	0.06601	0.29661	0.25901	0.08749	0.10358	0.8007	0.5434	0.03205	0.5582	0.0527	0.01082	0.0394	0.34849	0.0977	0.08195	0.88241	0.55042
QGC.Lacom11.Unk1	avgbs2_103643.1.60	0.309381	Mrg09	Chr7C	79.2	0.08309	0.9903	0.2129	0.58773	0.00022287	0.29677	0.50539	0.25974	1.0669e-05	0.05139	2.919e-07	0.05714	0.25211	0.36914	0.26624	0.19894	0.30918	0.11353	0.99152	0.38933	0.66363	0.30977	0.27602	0.08974	0.71457	0.36622	0.16661	0.28254	0.43359	0.32891	0.60589	0.47758	0.4945	0.54088	0.10725	0.40347	0.04103	0.11245	0.09367	0.88531	0.19519	0.30854	0.60838	0.68264
QGC.Lacom11.Unk1	avgbs_64048.1.14	0.0658683	Mrg09	Chr7C	80.2	0.05974	0.65711	0.45758	0.47038	0.00014094	0.50134	0.524	0.60831	6.9082e-05	0.60629	3.453e-07	0.91196	0.30566	0.80304	0.67055	0.13363	0.13494	0.09347	0.49708	0.05481	0.42105	0.40011	0.07685	0.23328	0.04143	0.22586	0.1167	0.04702	0.15767	0.14478	0.2417	0.06293	0.46564	0.58889	0.05643	0.56086	0.00683	0.09763	0.08373	0.95515	0.394	0.13158	0.79658	0.35235
QGC.Lacom11.Unk1	avgbs_cluster_17328.1.27	0.0499002	Mrg09	Chr7C	82.3	0.09312	0.6502	0.59458	0.60418	9.5784e-05	0.64962	0.43136	0.49512	5.3524e-05	0.55186	1.2065e-07	0.86244	0.23347	0.30408	0.68243	0.03821	0.13533	0.02522	0.30793	0.038	0.20659	0.1648	0.0711	0.27696	0.28876	0.13112	0.09865	0.08547	0.08152	0.02787	0.43843	0.08901	0.26087	0.34877	0.03572	0.7696	0.00438	0.18981	0.1663	0.22169	0.32767	0.09841	0.44718	0.27146
QGC.Lacom11.Unk1	avgbs2_51441.1.15	0.0618762	Mrg09	Chr7C	82.3	0.0655	0.86867	0.54164	0.42911	0.00013091	0.60756	0.52957	0.68502	3.1179e-05	0.46926	3.3639e-08	0.40883	0.38021	0.91057	0.27646	0.09496	0.46728	0.08225	0.74469	0.16843	0.72494	0.21373	0.16182	0.16796	0.23649	0.13245	0.23852	0.08539	0.35258	0.63864	0.77472	0.23889	0.57054	0.37669	0.03517	0.52499	0.01299	0.04573	0.09767	0.62377	0.63436	0.18255	0.85363	0.939
QGC.Lacom11.Unk1	avgbs_cluster_33838.1.51	0.0678643	Mrg09	Chr7C	82.3	0.10217	0.58684	0.65377	0.41895	0.00017697	0.79521	0.51224	0.73293	5.554e-05	0.61182	2.197e-07	0.95324	0.48767	0.42815	0.4595	0.13323	0.20191	0.0772	0.65939	0.20349	0.46356	0.31279	0.15552	0.12617	0.17085	0.24441	0.21044	0.11812	0.3614	0.07536	0.65518	0.27807	0.37536	0.47929	0.04233	0.64915	0.00507	0.23205	0.19214	0.16862	0.28573	0.11512	0.74161	0.73403
QGC.Lacom11.Unk1	avgbs2_48180.1.52	0.0858283	Mrg09	Chr7C	82.3	0.11222	0.39555	0.64592	0.54662	0.00017434	0.7446	0.48134	0.59965	0.00010322	0.68785	3.4106e-07	0.5471	0.40899	0.56818	0.64149	0.15383	0.35446	0.12289	0.34686	0.10387	0.45558	0.37088	0.17437	0.33055	0.18586	0.36318	0.19101	0.03794	0.36415	0.30858	0.36886	0.17915	0.35451	0.52948	0.10196	0.60098	0.03556	0.07116	0.21763	0.55284	0.39451	0.24672	0.39669	0.37234
QGC.Lacom11.Unk1	avgbs_87689.1.8	0.0558882	Mrg09	Chr7C	85.4	0.12428	0.97159	0.68098	0.57731	0.000287	0.57468	0.42997	0.55841	2.6517e-05	0.49226	4.108e-07	0.45681	0.34657	0.16527	0.11224	0.07244	0.08158	0.05877	0.96817	0.21877	0.3166	0.155	0.13879	0.03388	0.36937	0.1921	0.11849	0.22019	0.20287	0.97624	0.60204	0.30839	0.23306	0.36746	0.11947	0.82053	0.04809	0.34233	0.14254	0.83469	0.93126	0.47873	0.93582	0.87341
QGC.Lacom11.Unk1	avgbs_224017.1.37	0.105788	Mrg09	Chr7C	86.1	0.07763	0.84072	0.51775	0.64661	0.00034605	0.54459	0.61008	0.25493	3.0574e-05	0.23119	2.4596e-07	0.18286	0.20449	0.1577	0.48153	0.09681	0.67441	0.07395	0.21575	0.39286	0.35195	0.30271	0.15093	0.05606	0.64577	0.30397	0.0497	0.36168	0.50621	0.1274	0.6117	0.28647	0.31807	0.50575	0.09692	0.44435	0.13063	0.20935	0.23692	0.71473	0.22393	0.40696	0.1874	0.26193
QGC.Lacom11.Unk1	avgbs_4829.1.6	0.305389	Mrg09	Chr7C	86.7	0.0791	0.48734	0.30829	0.52352	0.00020764	0.71434	0.26787	0.66599	1.7667e-05	0.48671	8.1081e-08	0.08056	0.40272	0.89139	0.45516	0.1989	0.37515	0.1105	0.72795	0.47829	0.2047	0.21278	0.30867	0.02111	0.19576	0.27832	0.09882	0.19585	0.5052	0.14121	0.60204	0.53017	0.02287	0.3475	0.25311	0.64416	0.07392	0.72061	0.29372	0.9132	0.91231	0.44536	0.96625	0.92481
QGC.Lacom11.Unk1	avgbs_8444.1.29	0.229541	Mrg09	Chr7C	98.1	0.18619	0.65633	0.21346	0.83284	0.00134	0.66934	0.82194	0.24318	0.02259	0.11184	6.6267e-07	0.28345	0.2043	0.18316	0.80068	0.72266	0.56825	0.16298	0.61485	0.95004	0.54757	0.93787	0.48418	0.15212	0.63836	0.24959	0.55177	0.76439	0.42789	0.88026	0.48876	0.59728	0.47813	0.81439	0.5645	0.15572	0.81255	0.90061	0.28	0.73411	0.61233	0.31378	0.50875	0.99885
QGC.Lacom11.Unk1	avgbs2_108417.1.29	0.197605	Mrg02	Chr7D	27.3	0.10057	0.09142	0.43364	0.55314	0.00041846	0.32219	0.52269	0.25359	5.2202e-05	0.6075	3.3472e-08	0.22477	0.15724	0.84859	0.23364	0.18701	0.58158	0.20368	0.22148	0.42833	0.21461	0.32317	0.15176	0.28165	0.66293	0.38779	0.10374	0.32744	0.13839	0.31756	0.12985	0.30322	0.14002	0.4548	0.23081	0.61285	0.12799	0.36507	0.44342	0.15813	0.73331	0.69823	0.86426	0.8694
QGC.Lacom11.Unk1	avgbs_45720.1.19	0.00598802				0.0102	0.93081	0.23135	0.05649	6.8114e-05	0.09827	0.1677	0.20409	8.2097e-06	0.44158	2.6989e-07	0.17327	0.18607	0.2731	0.45526	0.0016	0.31958	0.00556	0.00072218	0.00432	0.00504	0.00578	0.00618	0.06032	0.71532	0.0175	0.00395	0.01462	0.01782	0.16753	0.01978	0.01103	0.01064	0.02249	0.00166	0.29159	0.00351	0.11657	0.00867	0.53326	0.00232	0.00057582	0.86833	0.63021
QGC.Lacom11.Unk1	avgbs_310214.1.16	0.011976				0.09419	0.81763	0.51663	0.50337	0.00033905	0.5151	0.47506	0.59263	1.8818e-05	0.00504	1.5511e-07	0.38696	0.38656	0.12921	0.34311	0.10811	0.2476	0.00741	0.88455	0.41328	0.03231	0.19995	0.09182	0.59942	0.42571	0.06096	0.16121	0.0425	0.16675	0.54824	0.71909	0.35718	0.09142	0.41044	0.1916	0.60493	0.08591	0.69633	0.2263	0.4952	0.74127	0.63451	0.77341	0.61298
QGC.Lacom11.Unk1	avgbs_311523.1.60	0.011976				0.06842	0.61517	0.51156	0.38374	0.000349	0.07201	0.61179	0.72049	6.8096e-06	0.00344	2.1806e-07	0.44112	0.48557	0.14175	0.53634	0.05036	0.36809	0.00579	0.1981	0.34216	0.00768	0.15046	0.03675	0.60772	0.27957	0.05036	0.18442	0.02173	0.14125	0.14483	0.21391	0.19401	0.0269	0.30573	0.15182	0.63484	0.10724	0.33096	0.35059	0.53672	0.29704	0.76136	0.64794	0.76597
QGC.Lacom11.Unk1	avgbs_56491.1.43	0.011976				0.04494	0.49445	0.31177	0.57325	8.5734e-05	0.64974	0.37219	0.51685	8.4453e-05	0.49454	5.8334e-07	0.2808	0.18322	0.28242	0.46385	0.04786	0.40582	0.04826	0.10293	0.13444	0.51831	0.14188	0.08168	0.19309	0.38708	0.20713	0.0705	0.19649	0.24493	0.51968	0.05906	0.17769	0.66817	0.30745	0.03483	0.132	0.04666	0.11243	0.18474	0.3688	0.24514	0.08288	0.88738	0.81663
QGC.Lacom11.Unk1	avgbs_cluster_50171.1.43	0.011976				0.11022	0.91993	0.76965	0.11189	0.00069909	0.83745	0.50213	0.57257	9.8297e-05	0.05467	6.4967e-07	0.44774	0.18588	0.82393	0.23259	0.0394	0.30334	0.00035296	0.31958	0.08409	0.0075	0.16997	0.04801	0.62026	0.18472	0.00955	0.11909	0.00695	0.06106	0.09419	0.34119	0.28224	0.03709	0.58731	0.23259	0.57461	0.07857	0.60749	0.27478	0.63285	0.57756	0.70759	0.88325	0.56752
QGC.Lacom11.Unk1	avgbs_cluster_7807.1.57	0.011976				0.09629	0.0035	0.71594	0.6137	0.00036893	0.00227	0.55834	0.81961	1.6092e-05	0.172	2.8948e-07	0.61362	0.59755	0.02331	0.44296	0.06006	0.70171	0.03968	0.79667	0.1857	0.06346	0.16123	0.06825	0.56761	0.4897	0.20272	0.11061	0.12129	0.25404	0.79708	0.54105	0.18747	0.07297	0.37357	0.12189	0.79452	0.07129	0.11417	0.25766	0.76444	0.29735	0.55236	0.58579	0.84053
QGC.Lacom11.Unk1	avgbs2_114397.1.38	0.011976				0.09785	0.74614	0.54714	0.54068	0.00038895	0.42463	0.52401	0.72212	1.8753e-05	0.01186	2.2955e-07	0.2799	0.49465	0.18202	0.42949	0.09306	0.22278	0.00695	0.82303	0.40563	0.04293	0.17798	0.07225	0.67549	0.39151	0.05584	0.19739	0.04306	0.13269	0.44188	0.71277	0.37774	0.09642	0.38649	0.15684	0.62983	0.10099	0.63166	0.1899	0.57235	0.67118	0.67648	0.91709	0.63737
QGC.Lacom11.Unk1	avgbs_cluster_17920.1.33	0.0139721				0.02004	0.93949	0.52443	0.24935	3.3009e-05	0.62352	0.46357	0.47077	8.8097e-06	0.11493	1.6831e-07	0.53724	0.15745	0.23719	0.44573	0.02631	0.1455	0.01852	0.19346	0.06988	0.04124	0.07705	0.03711	0.60785	0.3647	0.04329	0.08197	0.026	0.0775	0.21932	0.29019	0.09116	0.12438	0.32775	0.08927	0.82656	0.03875	0.41302	0.25336	0.69023	0.27683	0.2383	0.45287	0.83901
QGC.Lacom11.Unk1	avgbs_cluster_37643.1.37	0.0139721				0.06352	0.81188	0.53615	0.40723	0.00028508	0.13738	0.52329	0.51096	1.6991e-05	0.04087	1.7464e-07	0.30266	0.24718	0.64231	0.7509	0.20459	0.7266	0.0352	0.81197	0.44945	0.05317	0.33071	0.21423	0.64924	0.25709	0.23454	0.26121	0.04566	0.19573	0.20459	0.47257	0.45792	0.05813	0.52955	0.2126	0.77274	0.09455	0.61867	0.24031	0.98996	0.49661	0.54293	0.45012	0.67128
QGC.Lacom11.Unk1	avgbs2_30790.1.19	0.0139721				0.07901	0.80607	0.5773	0.25743	0.00032975	0.38939	0.45328	0.79028	4.3142e-05	0.01138	1.9721e-07	0.30526	0.55063	0.42282	0.47929	0.02249	0.34046	0.00074556	0.33439	0.2152	0.00202	0.07952	0.01824	0.57473	0.23077	0.01907	0.14076	0.00487	0.07554	0.15352	0.216	0.24144	0.01159	0.31603	0.11618	0.57183	0.06893	0.60428	0.2041	0.49188	0.39673	0.70853	0.94551	0.6261
QGC.Lacom11.Unk1	avgbs2_97985.1.6	0.0159681				0.03919	0.13433	0.37803	0.0383	5.9736e-05	0.80716	0.51637	0.92416	0.00094525	0.02183	7.1958e-07	0.80846	0.79444	0.70212	0.63488	0.03806	0.61935	0.0298	0.12196	0.12629	0.3982	0.19413	0.02331	0.17833	0.55887	0.08219	0.05063	0.05488	0.14279	0.12562	0.04509	0.05806	0.1667	0.33458	0.09279	0.75051	0.02784	0.5891	0.16204	0.78331	0.01706	0.22042	0.641	0.96823
QGC.Lacom11.Unk1	avgbs_67273.1.46	0.0179641				0.12333	0.87223	0.39337	0.40674	0.00027887	0.64792	0.24484	0.24096	6.2515e-06	0.24322	1.1155e-07	0.1137	0.36182	0.64433	0.4379	0.98812	0.74609	0.30709	0.46078	0.79877	0.77333	0.94271	0.85366	0.94039	0.36831	0.42584	0.81959	0.49002	0.97958	0.22808	0.82257	0.58154	0.87761	0.59074	0.22408	0.6179	0.30558	0.20473	0.30846	0.86423	0.79159	0.4048	0.03799	0.57474
QGC.Lacom11.Unk1	avgbs_2787.1.31	0.0219561				0.18594	0.91928	0.03994	0.68578	0.00058194	0.87902	0.62878	0.58603	4.8725e-05	0.42916	8.6463e-07	0.79687	0.40116	0.83377	0.5991	0.04293	0.53823	0.05954	0.21664	0.13055	0.92325	0.13404	0.0671	0.06277	0.48142	0.31774	0.05514	0.09502	0.24763	0.99239	0.47657	0.1392	0.80665	0.31834	0.02516	0.3017	0.04458	0.18223	0.07953	0.1591	0.32621	0.10826	0.68711	0.00196
QGC.Lacom11.Unk1	avgbs_37345.1.46	0.0219561				0.08558	0.24954	0.52052	0.24367	0.00018396	0.74592	0.44353	0.19344	2.0574e-06	0.4503	6.1312e-08	0.8833	0.13394	0.9004	0.04377	0.19259	0.67083	0.10134	0.62851	0.56643	0.49046	0.33092	0.26659	0.15039	0.73382	0.20711	0.16788	0.36489	0.32479	0.83083	0.86002	0.37885	0.82288	0.54743	0.15708	0.61448	0.05644	0.50048	0.35242	0.84403	0.84576	0.40929	0.93073	0.7461
QGC.Lacom11.Unk1	avgbs_cluster_13329.1.40	0.0219561				0.06057	0.85847	0.40949	0.5931	3.7832e-05	0.76186	0.53016	0.77287	3.9625e-05	0.1917	3.9845e-07	0.76418	0.58609	0.62395	0.31205	0.0466	0.59221	0.05047	0.14693	0.16729	0.14005	0.21137	0.17218	0.53395	0.41315	0.27577	0.15469	0.21588	0.48391	0.55883	0.12877	0.18431	0.57546	0.48122	0.11797	0.04916	0.05272	0.47894	0.17904	0.8806	0.88329	0.50843	0.95418	0.90643
QGC.Lacom11.Unk1	avgbs2_107940.1.32	0.0219561				0.12924	0.86767	0.69884	0.30889	0.00044244	0.76838	0.48401	0.36823	0.00017306	0.36182	3.7194e-07	0.51684	0.07325	0.6124	0.47952	0.08011	0.68195	0.14184	0.04501	0.16625	0.72697	0.17358	0.13706	0.11356	0.11736	0.40721	0.18885	0.46528	0.36779	0.06501	0.03269	0.21328	0.99991	0.38055	0.1036	0.13189	0.08551	0.2934	0.17827	0.45619	0.31785	0.29959	0.88201	0.77454
QGC.Lacom11.Unk1	avgbs_cluster_21298.1.29	0.0239521				0.05359	0.82193	0.09264	0.60926	0.0002589	0.21596	0.39282	0.55043	2.4926e-05	0.35647	5.8505e-07	0.11704	0.48918	0.17489	0.79022	0.1323	0.50071	0.13724	0.54819	0.16466	0.18583	0.09333	0.15789	0.53898	0.61921	0.35952	0.08969	0.23338	0.38347	0.61634	0.50661	0.23305	0.23859	0.03671	0.0943	0.59343	0.04799	0.67402	0.14396	0.31375	0.72494	0.14107	0.85571	0.88087
QGC.Lacom11.Unk1	avgbs_cluster_31587.1.17	0.0239521				0.10393	0.63408	0.69309	0.21847	0.00039154	0.71978	0.24186	0.59534	2.6409e-05	0.59713	1.2911e-07	0.0947	0.30583	0.01217	0.51718	0.21737	0.28923	0.01739	0.53021	0.28366	0.13072	0.30731	0.27595	0.46253	0.62474	0.11373	0.19986	0.38111	0.60763	0.76072	0.89885	0.13895	0.38493	0.471	0.27239	0.36032	0.0931	0.61897	0.46352	0.38942	0.9082	0.39859	0.9091	0.86278
QGC.Lacom11.Unk1	avgbs2_111827.1.8	0.0239521				0.09815	0.38577	0.4887	0.56016	0.00024071	0.38273	0.43691	0.63016	0.00012585	0.75849	3.6387e-07	0.57037	0.29823	0.39503	0.53815	0.03973	0.72944	0.08312	0.10126	0.14501	0.92705	0.10072	0.06475	0.66198	0.08998	0.29231	0.10482	0.29164	0.17663	0.40775	0.1191	0.04225	0.87786	0.26576	0.13448	0.7653	0.08883	0.1273	0.19647	0.8999	0.43369	0.23651	0.92663	0.89929
QGC.Lacom11.Unk1	avgbs_110151.1.37	0.0279441				0.07382	0.1538	0.39423	0.4377	0.00016472	0.48224	0.31621	0.40466	3.6817e-05	0.30594	9.1444e-08	0.89533	0.25666	0.91795	0.54373	0.06203	0.51986	0.05029	0.56623	0.19756	0.59725	0.15961	0.16089	0.2108	0.51042	0.20575	0.13787	0.21701	0.33678	0.84888	0.45022	0.14622	0.45033	0.21733	0.1705	0.24174	0.09533	0.24346	0.21882	0.17116	0.44591	0.431	0.92871	0.17373
QGC.Lacom11.Unk1	avgbs_218742.1.62	0.0279441				0.03767	0.96605	0.13817	0.15875	0.00020825	0.12227	0.58256	0.70238	3.2357e-05	0.64152	3.4975e-07	0.77708	0.4671	0.97334	0.57891	0.24414	0.4319	0.19323	0.82469	0.49243	0.02567	0.27407	0.26874	0.10268	0.37893	0.41607	0.21921	0.25421	0.4042	0.13287	0.87727	0.44273	0.03471	0.43425	0.06754	0.40055	0.16472	0.06126	0.21953	0.05722	0.62297	0.52687	0.9855	0.59037
QGC.Lacom11.Unk1	avgbs_80901.1.30	0.0279441				0.07563	0.4249	0.53679	0.4086	0.00013788	0.87982	0.44832	0.27687	4.3846e-06	0.52267	1.9076e-07	0.22134	0.19642	0.31404	0.77231	0.11234	0.60865	0.03438	0.93488	0.25745	0.67969	0.2166	0.13708	0.50998	0.3549	0.17393	0.18197	0.0844	0.32054	0.07028	0.99403	0.22832	0.51075	0.36183	0.12133	0.2953	0.03361	0.36603	0.27879	0.39654	0.8196	0.56028	0.44505	0.31546
QGC.Lacom11.Unk1	avgbs_cluster_38005.1.25	0.0279441				0.02277	0.94223	0.13999	0.54022	7.5751e-05	0.1505	0.17247	0.343	4.8827e-05	0.21487	6.6384e-08	0.22433	0.23746	0.12718	0.4066	0.14033	0.65068	0.11383	0.5724	0.32222	0.93834	0.18529	0.24944	0.62086	0.67239	0.365	0.22899	0.33461	0.45004	0.59269	0.89221	0.22209	0.70315	0.27595	0.20743	0.37417	0.12294	0.74921	0.3325	0.03999	0.3496	0.45174	0.99084	0.92151
QGC.Lacom11.Unk1	avgbs_cluster_29596.1.22	0.0319361				0.08843	0.93833	0.37093	0.67578	0.00016418	0.42164	0.58416	0.46815	1.361e-05	0.55328	2.0031e-07	0.14009	0.32663	0.72034	0.66106	0.15966	0.56772	0.11509	0.38539	0.42576	0.86659	0.32866	0.26189	0.68245	0.63965	0.34011	0.18086	0.50551	0.47894	0.1785	0.73912	0.39504	0.92484	0.50602	0.214	0.47883	0.07644	0.68184	0.29298	0.38322	0.6494	0.5893	0.83199	0.28746
QGC.Lacom11.Unk1	avgbs_cluster_37103.1.9	0.0319361				0.10941	0.90989	0.66664	0.52701	0.00020697	0.82669	0.07733	0.68025	1.6943e-05	0.76286	3.7408e-07	0.20237	0.38088	0.83663	0.45542	0.11647	0.52682	0.04151	0.674	0.35545	0.88048	0.13404	0.14252	0.30208	0.2912	0.13793	0.13701	0.28922	0.45405	0.97432	0.51499	0.38099	0.95091	0.27921	0.30357	0.07907	0.08936	0.39535	0.41309	0.30213	0.26055	0.57062	0.51323	0.90705
QGC.Lacom11.Unk1	avgbs_27311.1.15	0.0339321				0.08373	0.54332	0.29752	0.13621	0.00030171	0.79	0.44236	0.50322	6.1109e-05	0.1322	1.1045e-07	0.3349	0.27927	0.19618	0.72214	0.17547	0.4724	0.09778	0.80909	0.37258	0.81771	0.38315	0.19401	0.64309	0.41723	0.34951	0.25143	0.28487	0.42232	0.77409	0.80903	0.36103	0.96706	0.52951	0.17856	0.41033	0.10268	0.65352	0.24765	0.6312	0.97549	0.55999	0.86835	0.26787
QGC.Lacom11.Unk1	avgbs_cluster_13286.1.32	0.0339321				0.1	0.5957	0.71408	0.31365	0.00030234	0.77038	0.35067	0.45185	2.2609e-05	0.62212	2.4901e-07	0.05244	0.28633	0.67676	0.07082	0.12187	0.56917	0.02919	0.89729	0.38959	0.59056	0.11131	0.10588	0.6026	0.34699	0.16913	0.0437	0.02966	0.44513	0.67712	0.28825	0.36774	0.77975	0.09937	0.14166	0.65706	0.06211	0.45239	0.21393	0.54267	0.61165	0.50673	0.37533	0.84463
QGC.Lacom11.Unk1	avgbs_cluster_34917.1.21	0.0339321				0.10604	0.11503	0.47738	0.36743	0.00019293	0.8252	0.11999	0.49992	3.2201e-05	0.54026	1.1652e-07	0.70549	0.24739	0.83268	0.70603	0.04766	0.44114	0.05159	0.71156	0.12145	0.75999	0.08564	0.1035	0.261	0.59294	0.15515	0.10572	0.20532	0.26621	0.20677	0.67552	0.06614	0.62829	0.13802	0.0868	0.53224	0.03545	0.08867	0.26414	0.60578	0.5107	0.19592	0.81356	0.38163
QGC.Lacom11.Unk1	avgbs_954.1.51	0.0359281				0.11711	0.52974	0.56513	0.71646	0.00038397	0.40442	0.48319	0.00957	7.1463e-05	0.58325	3.1376e-07	0.32904	0.03041	0.52411	0.65997	0.01642	0.31147	0.04666	0.15549	0.0889	0.84534	0.03866	0.29491	0.62319	0.85647	0.2385	0.03529	0.19378	0.51605	0.34993	0.26153	0.14468	0.89956	0.12119	0.35206	0.24407	0.07417	0.82456	0.81633	0.2127	0.74778	0.34301	0.20742	0.5721
QGC.Lacom11.Unk1	avgbs_117753.1.25	0.0379242				0.09992	0.98458	0.25856	0.57547	0.00027803	0.98161	0.03269	0.05318	3.624e-06	0.07615	3.1199e-08	0.00934	0.03232	0.39736	0.00899	0.17693	0.62738	0.08542	0.97561	0.39052	0.75444	0.2997	0.24331	0.71997	0.59173	0.1721	0.21965	0.35297	0.24216	0.34553	0.77508	0.37824	0.77794	0.25484	0.16584	0.14745	0.05982	0.72895	0.36261	0.40803	0.99247	0.58277	0.39425	0.8749
QGC.Lacom11.Unk1	avgbs_15594.1.48	0.0379242				0.07844	0.90024	0.36403	0.39291	0.00012443	0.77045	0.38678	0.70293	1.8275e-05	0.4464	3.939e-07	0.98139	0.45115	0.77305	0.53351	0.10114	0.57037	0.1067	0.77222	0.32059	0.17442	0.1644	0.16706	0.75578	0.69643	0.27739	0.15798	0.19532	0.40019	0.16184	0.3268	0.32004	0.48193	0.17457	0.2389	0.77867	0.12055	0.72346	0.13819	0.08043	0.68528	0.72625	0.50819	0.36172
QGC.Lacom11.Unk1	avgbs_113014.1.62	0.0399202				0.07462	0.95822	0.41991	0.52709	0.00013459	0.52525	0.6132	0.7669	4.481e-05	0.45121	8.3931e-07	0.59837	0.44153	0.53663	0.62618	0.09831	0.71312	0.07485	0.13329	0.0759	0.10022	0.14969	0.10251	0.13345	0.49748	0.33554	0.06558	0.20848	0.1497	0.21127	0.10209	0.04353	0.26701	0.17696	0.04384	0.21893	0.05176	0.15327	0.14038	0.83492	0.09638	0.01699	0.25513	0.89288
QGC.Lacom11.Unk1	avgbs_cluster_19668.1.30	0.0399202				0.00977	0.94571	0.25334	0.49638	3.3729e-06	0.155	0.44016	0.64731	6.4037e-05	0.33456	7.5736e-08	0.91514	0.43534	0.53915	0.68036	0.01601	0.34598	0.02595	0.01593	0.05875	0.26135	0.02	0.0081	0.11669	0.38007	0.02364	0.02045	0.09432	0.00496	0.01241	0.00020036	0.01199	0.09903	0.00466	0.00714	0.02576	0.00334	0.00020886	0.01522	0.89847	0.00714	0.07035	0.88917	0.8907
QGC.Lacom11.Unk1	avgbs_cluster_24772.1.22	0.0399202				0.04749	0.89963	0.19103	0.57826	0.00021086	0.08224	0.6525	0.7961	4.7609e-05	0.54824	2.2689e-07	0.9854	0.47286	0.71916	0.61862	0.22044	0.53754	0.1882	0.73206	0.34503	0.44614	0.31948	0.30091	0.25572	0.69938	0.30548	0.23519	0.43259	0.55457	0.91756	0.4461	0.30058	0.96403	0.49588	0.15213	0.51752	0.07786	0.37291	0.27226	0.82497	0.53191	0.2558	0.79274	0.88968
QGC.Lacom11.Unk1	avgbs_49250.1.24	0.0419162				0.08754	0.34386	0.46929	0.47755	0.00038977	0.65083	0.50992	0.01088	4.4039e-05	0.53499	7.354e-07	0.37398	0.02128	0.28447	0.43458	0.00553	0.19986	0.11192	0.12038	0.05701	0.83325	0.03694	0.21417	0.00912	0.6256	0.26198	0.08894	0.10761	0.95416	0.53028	0.29307	0.07345	0.85829	0.204	0.18984	0.62235	0.06017	0.162	0.58247	0.57029	0.76904	0.46361	0.20354	0.91235
QGC.Lacom11.Unk1	avgbs_68676.1.63	0.0419162				0.07699	0.62602	0.47884	0.57303	1.9223e-05	0.17994	0.44009	0.26742	6.5621e-06	0.15244	1.0329e-07	0.44267	0.10846	0.78368	0.50337	0.14832	0.716	0.08943	0.38063	0.41004	0.58131	0.27973	0.22309	0.56452	0.44962	0.2975	0.15054	0.20035	0.4449	0.52154	0.48203	0.43284	0.8592	0.40527	0.05239	0.80113	0.0313	0.23506	0.09782	0.2758	0.17436	0.44149	0.81622	0.9856
QGC.Lacom11.Unk1	avgbs2_109705.2.51	0.0419162				0.04983	0.70262	0.20607	0.59894	0.00013964	0.72857	0.44679	0.1944	0.00013148	0.72167	1.3964e-07	0.22187	0.20953	0.78289	0.32689	0.10833	0.65858	0.08367	0.88259	0.4047	0.70582	0.15622	0.17115	0.32376	0.57575	0.14504	0.15267	0.38067	0.40789	0.21692	0.63134	0.3647	0.99765	0.21845	0.20067	0.45402	0.05793	0.64718	0.34586	0.93088	0.77416	0.72005	0.71845	0.69982
QGC.Lacom11.Unk1	avgbs2_90928.1.55	0.0419162				0.02244	0.99765	0.0132	0.61567	8.2806e-05	0.11346	0.42508	0.74437	5.545e-05	0.72384	1.39e-07	0.44401	0.28555	0.47823	0.52577	0.08517	0.43438	0.07488	0.36903	0.26493	0.82025	0.17807	0.14332	0.02154	0.70373	0.23396	0.14012	0.16945	0.42001	0.27818	0.34378	0.21008	0.89923	0.3465	0.12508	0.14026	0.06614	0.21457	0.17213	0.07308	0.11464	0.33663	0.98415	0.58921
QGC.Lacom11.Unk1	avgbs_5404.1.13	0.0439122				0.13774	0.14498	0.7273	0.30843	0.00035895	0.64007	0.22227	0.65551	9.5802e-05	0.56712	1.1515e-07	0.78538	0.43609	0.88101	0.72459	0.09279	0.39994	0.10143	0.74876	0.16366	0.30163	0.21273	0.17491	0.06112	0.30093	0.35498	0.17309	0.2664	0.10957	0.99495	0.23653	0.04286	0.19453	0.29357	0.19462	0.47552	0.0818	0.08129	0.26358	0.33541	0.72005	0.39718	0.99046	0.65528
QGC.Lacom11.Unk1	avgbs_73009.1.33	0.0439122				0.1039	0.96785	0.26942	0.5748	0.00023769	0.39807	0.57819	0.53094	2.3161e-05	0.53531	2.1232e-07	0.64229	0.207	0.74734	0.59186	0.14118	0.7128	0.08217	0.40289	0.31589	0.50173	0.42923	0.2745	0.41382	0.70809	0.23918	0.24424	0.32958	0.56545	0.27144	0.79479	0.36296	0.98039	0.58592	0.11026	0.44575	0.05741	0.65821	0.20216	0.45847	0.75193	0.32019	0.5135	0.46221
QGC.Lacom11.Unk1	avgbs_cluster_32027.1.31	0.0439122				0.0707	0.99669	0.65242	0.13755	0.00025263	0.76574	0.42721	0.49836	0.00017238	0.72069	5.9683e-07	0.52644	0.1246	0.93478	0.77301	0.03884	0.48172	0.01124	0.23084	0.00921	0.41868	0.1438	0.14354	0.4502	0.67823	0.15083	0.09067	0.20027	0.37087	0.27445	0.37859	0.07858	0.47825	0.4404	0.18503	0.30007	0.07426	0.41122	0.16086	0.33936	0.86704	0.37648	0.92584	0.89083
QGC.Lacom11.Unk1	avgbs_89179.1.39	0.0459082				0.08094	0.32908	0.62753	0.28907	0.00011772	0.99028	0.20918	0.52253	1.7726e-06	0.52432	3.0235e-07	0.5567	0.25953	0.056	0.68575	0.09287	0.74313	0.08003	0.94647	0.10088	0.40548	0.20783	0.05259	0.54388	0.03176	0.13452	0.03499	0.11306	0.10405	0.3835	0.91348	0.06257	0.27092	0.35723	0.05855	0.27724	0.02664	0.32728	0.19706	0.1391	0.89598	0.23475	0.77499	0.96736
QGC.Lacom11.Unk1	avgbs_cluster_15566.1.63	0.0459082				0.12102	0.85485	0.3597	0.40769	0.00031183	0.83686	0.21806	0.44548	1.0748e-05	0.27543	2.1347e-07	0.40834	0.29727	0.52304	0.79018	0.06701	0.35057	0.06051	0.32402	0.12407	0.34688	0.06812	0.08742	0.25109	0.66444	0.15407	0.05642	0.09252	0.04537	0.79508	0.41628	0.03354	0.47471	0.12213	0.00984	0.55308	0.00878	0.16077	0.00066564	0.74965	0.10353	0.07857	0.82982	0.90016
QGC.Lacom11.Unk1	avgbs2_108568.1.29	0.0459082				0.11997	0.91515	0.49573	0.67265	0.00042667	0.82427	0.57322	0.61533	0.00010208	0.53045	3.1808e-07	0.66958	0.47493	0.92471	0.48123	0.16881	0.663	0.09333	0.97945	0.40894	0.54379	0.29185	0.24457	0.31869	0.61996	0.31317	0.25402	0.39653	0.49835	0.51369	0.57612	0.30938	0.62627	0.47314	0.34138	0.32476	0.1568	0.80848	0.35046	0.1535	0.63894	0.79411	0.65295	0.92142
QGC.Lacom11.Unk1	avgbs_cluster_40614.1.53	0.0479042				0.12668	0.29303	0.60569	0.25813	6.0125e-05	0.02263	0.45367	0.14904	3.7599e-05	0.37891	5.7186e-07	0.67075	0.1614	0.16532	0.65708	0.1488	0.22342	0.10156	0.52338	0.30761	0.96381	0.3091	0.16918	0.41087	0.52319	0.16235	0.20521	0.25236	0.34015	0.49573	0.98117	0.31487	0.72713	0.3967	0.06226	0.40167	0.0328	0.50493	0.18854	0.02528	0.66027	0.36563	0.42767	0.86117
QGC.Lacom11.Unk1	avgbs_cluster_4437.1.21	0.0479042				0.03014	0.58783	0.19919	0.58751	0.0003037	0.37858	0.13452	0.0405	0.00016323	0.31717	1.5413e-07	0.20053	0.02568	0.36949	0.64492	0.1636	0.5052	0.11407	0.48945	0.18403	0.7515	0.21307	0.20073	0.00522	0.73045	0.36364	0.04417	0.05482	0.45306	0.14809	0.40673	0.35787	0.63865	0.34624	0.15605	0.32391	0.22	0.0267	0.1759	0.92072	0.91738	0.60804	0.03335	0.38682
QGC.Lacom11.Unk1	avgbs2_124382.1.26	0.0499002				0.08927	0.91879	0.63611	0.53174	0.00023606	0.2777	0.48733	0.52748	4.9641e-05	0.42799	3.5384e-07	0.37809	0.24299	0.39779	0.35925	0.09285	0.15799	0.10387	0.26685	0.06962	0.12264	0.13209	0.06321	0.48019	0.55117	0.35939	0.05909	0.14864	0.02341	0.73505	0.06303	0.0248	0.08218	0.16887	0.00691	0.71938	0.07124	0.01029	0.01538	0.30396	0.01619	0.02896	0.91511	0.59553
QGC.Lacom11.Unk1	avgbs2_191544.1.62	0.0499002				0.07408	0.30056	0.48967	0.20796	5.8256e-05	0.47957	0.39553	0.59142	2.3431e-05	0.45537	2.2723e-08	0.35306	0.32361	0.08487	0.53744	0.08039	0.38029	0.03737	0.62602	0.04761	0.85041	0.12885	0.04088	0.52938	0.11621	0.05406	0.01442	0.05155	0.18105	0.41227	0.79116	0.04763	0.98387	0.21232	0.12586	0.16809	0.00972	0.25527	0.33217	0.22708	0.21364	0.10316	0.95432	0.73488
QGC.Lacom11.Unk1	avgbs2_63391.1.61	0.0499002				0.05917	0.89983	0.27122	0.57893	0.00017009	0.17844	0.57929	0.72957	1.5695e-05	0.73494	3.5772e-07	0.69354	0.4512	0.30806	0.19097	0.07178	0.66346	0.02432	0.1584	0.11698	0.51851	0.1885	0.17382	0.58776	0.39932	0.15205	0.27683	0.2711	0.55323	0.30543	0.30122	0.09427	0.77982	0.26496	0.10456	0.14649	0.08437	0.25762	0.25002	0.87252	0.23977	0.20841	0.8184	0.71275
QGC.Lacom11.Unk1	avgbs_cluster_16571.1.6	0.0518962				0.0856	0.95482	0.55233	0.13505	0.00029782	0.65037	0.4486	0.26436	1.4288e-05	0.02118	2.6412e-07	0.16023	0.2529	0.07524	0.50736	0.09665	0.56976	0.11821	0.45265	0.30096	0.11184	0.1064	0.13149	0.45904	0.62223	0.33334	0.1692	0.27445	0.45415	0.31082	0.74637	0.2239	0.38376	0.18378	0.07452	0.63477	0.09322	0.31209	0.16226	0.35495	0.18776	0.22168	0.66125	0.9099
QGC.Lacom11.Unk1	avgbs2_27074.1.17	0.0538922				0.08061	0.84105	0.60808	0.6299	9.0739e-05	0.52438	0.45013	0.26531	1.1196e-05	0.58246	2.6341e-08	0.61749	0.08895	0.21467	0.50123	0.23492	0.69967	0.15821	0.91608	0.41378	0.53051	0.40063	0.25439	0.18696	0.57241	0.31484	0.1589	0.35717	0.39189	0.68054	0.98623	0.30661	0.70848	0.57551	0.20579	0.77475	0.10951	0.40864	0.16154	0.84773	0.40627	0.6037	0.97573	0.75071
QGC.Lacom11.Unk1	avgbs2_42833.1.38	0.0538922				0.11641	0.77488	0.50326	0.62853	0.00040427	0.24015	0.6051	0.50838	6.1263e-05	0.25906	2.9126e-07	0.24681	0.26004	0.26246	0.576	0.09201	0.61686	0.07356	0.14858	0.0854	0.22724	0.12393	0.09909	0.18053	0.50216	0.31885	0.04978	0.26301	0.12664	0.27912	0.07383	0.05696	0.4951	0.15644	0.03651	0.24969	0.08199	0.17222	0.10299	0.8886	0.10343	0.01395	0.13259	0.92449
QGC.Lacom11.Unk1	avgbs_cluster_14543.1.52	0.0578842				0.0633	0.3821	0.36367	0.53707	0.00010469	0.56002	0.39102	0.63363	2.1337e-05	0.67705	7.5672e-07	0.53528	0.31547	0.85268	0.60289	0.04679	0.29256	0.08262	0.09812	0.06423	0.25003	0.04845	0.03725	0.22639	0.53887	0.28833	0.05357	0.09942	0.01454	0.50902	0.02604	0.00817	0.18139	0.04402	0.00193	0.84737	0.02988	0.00213	0.00672	0.12548	0.02244	0.01803	0.99903	0.57898
QGC.Lacom11.Unk1	avgbs2_130595.1.24	0.0578842				0.05309	0.80194	0.0792	0.46984	8.8027e-05	0.23663	0.19013	0.35484	1.9604e-05	0.54951	4.156e-07	0.37761	0.36303	0.08685	0.29881	0.00595	0.02305	0.03079	0.01935	0.02194	0.02243	0.00463	0.03255	0.25033	0.61507	0.06613	0.11654	0.1688	0.114	0.82683	0.16834	0.08468	0.03015	0.00337	0.01612	0.15061	0.0204	0.03081	0.00618	0.57777	0.06154	0.09486	0.94374	0.54368
QGC.Lacom11.Unk1	avgbs_11710.1.38	0.0618762				0.098	0.99619	0.38061	0.55394	6.3694e-05	0.33373	0.59987	0.50429	4.6677e-05	0.30499	4.9757e-07	0.6806	0.27871	0.51744	0.30521	0.05064	0.67608	0.04918	0.89547	0.22026	0.87288	0.11044	0.07194	0.57885	0.47308	0.11669	0.09409	0.18421	0.28934	0.79674	0.26786	0.22173	0.61404	0.22206	0.07653	0.56955	0.05757	0.48558	0.16571	0.95283	0.50952	0.35881	0.59309	0.53631
QGC.Lacom11.Unk1	avgbs_cluster_19142.1.49	0.0618762				0.11742	0.90763	0.60168	0.4182	0.00014313	0.27841	0.42167	0.64806	8.8459e-05	0.33733	3.3128e-07	0.77537	0.30184	0.90822	0.67046	0.0967	0.56145	0.07499	0.58156	0.23438	0.96535	0.18186	0.10179	0.46452	0.53005	0.16082	0.11209	0.21133	0.32901	0.67204	0.63128	0.14777	0.70043	0.29282	0.18331	0.661	0.06159	0.70606	0.22937	0.647	0.95949	0.34834	0.78117	0.82916
QGC.Lacom11.Unk1	avgbs2_155955.1.38	0.0638723				0.08664	0.34703	0.49869	0.61203	0.00013651	0.03468	0.3412	0.47454	0.00010216	0.28261	1.5798e-07	0.57911	0.18694	0.47321	0.41259	0.1194	0.6471	0.08872	0.35081	0.44038	0.70377	0.25912	0.15554	0.52391	0.67769	0.22731	0.10011	0.15495	0.44986	0.99795	0.17112	0.39588	0.97521	0.44571	0.07805	0.68437	0.05628	0.32877	0.04987	0.23888	0.32151	0.49748	0.94378	0.87028
QGC.Lacom11.Unk1	avgbs_22276.1.19	0.0658683				0.07366	0.99294	0.53796	0.45151	0.00022786	0.51868	0.24702	0.75519	2.6326e-05	0.56662	6.5152e-07	0.38839	0.51669	0.73628	0.21649	0.13863	0.53437	0.14655	0.39735	0.25166	0.72608	0.24791	0.18366	0.74179	0.5113	0.32279	0.23159	0.21999	0.35599	0.45658	0.65898	0.1566	0.80282	0.35432	0.09299	0.77876	0.03507	0.25748	0.27952	0.10846	0.85373	0.28447	0.70582	0.80746
QGC.Lacom11.Unk1	avgbs_8736.1.34	0.0658683				0.14569	0.42197	0.69337	0.61107	0.00043206	0.12927	0.65608	0.5898	2.0484e-05	0.31377	1.6483e-07	0.86364	0.34815	0.67232	0.78064	0.20674	0.65572	0.17479	0.37229	0.46769	0.89937	0.30805	0.27433	0.59651	0.74665	0.30115	0.1192	0.25921	0.33139	0.78564	0.45981	0.37673	0.65488	0.41895	0.28149	0.68939	0.08145	0.61299	0.24054	0.74664	0.68821	0.6036	0.94266	0.88953
QGC.Lacom11.Unk1	avgbs_117913.1.61	0.0718563				0.11907	0.72826	0.64765	0.49148	0.00019554	0.36542	0.59106	0.68185	9.383e-05	0.61117	4.6352e-07	0.96903	0.37827	0.78334	0.4012	0.21782	0.64354	0.12956	0.62117	0.46669	0.42351	0.37653	0.31315	0.59319	0.71793	0.31384	0.21253	0.42386	0.44174	0.99772	0.58781	0.42956	0.30895	0.5081	0.25715	0.35813	0.09313	0.66691	0.14578	0.61286	0.78527	0.61618	0.84514	0.78877
QGC.Lacom11.Unk1	avgbs_cluster_12696.1.37	0.0718563				0.1022	0.48071	0.57697	0.64412	0.00021906	0.34514	0.534	0.4674	5.6999e-05	0.72574	3.2243e-07	0.47146	0.31385	0.98296	0.42714	0.17085	0.38239	0.09329	0.6834	0.45107	0.46804	0.31289	0.23387	0.01672	0.6797	0.13875	0.18266	0.4354	0.48488	0.6643	0.91653	0.40824	0.82054	0.4885	0.13272	0.32896	0.05563	0.43139	0.24568	0.0037	0.39187	0.67782	0.94726	0.9469
QGC.Lacom11.Unk1	avgbs_54431.1.29	0.0758483				0.11035	0.50635	0.63172	0.61271	0.00034097	0.10259	0.42446	0.85938	6.1814e-05	0.70789	4.5506e-07	0.88383	0.55536	0.90557	0.25889	0.18557	0.70282	0.11924	0.78673	0.32221	0.94279	0.26426	0.28277	0.66959	0.72415	0.33919	0.22303	0.4175	0.51894	0.53933	0.95251	0.21192	0.46438	0.27535	0.18754	0.54063	0.09653	0.64353	0.1469	0.70276	0.74913	0.43714	0.95466	0.65946
QGC.Lacom11.Unk1	avgbs_cluster_28696.1.45	0.0758483				0.07526	0.76054	0.5763	0.28809	0.00025009	0.51656	0.50625	0.49809	2.6295e-05	0.66306	1.0664e-07	0.66269	0.28688	0.81492	0.7544	0.13908	0.64469	0.05828	0.65509	0.37438	0.59629	0.23481	0.18698	0.41739	0.50362	0.15073	0.17526	0.22962	0.39775	0.97936	0.73046	0.27258	0.61141	0.28964	0.23582	0.64879	0.0867	0.7049	0.23258	0.67366	0.78172	0.56887	0.96941	0.09507
QGC.Lacom11.Unk1	avgbs_cluster_9232.1.30	0.0758483				0.085	0.91514	0.64378	0.46347	0.00021951	0.41417	0.62454	0.57038	3.8606e-05	0.42804	7.4255e-08	0.54123	0.2137	0.34298	0.71058	0.09527	0.38544	0.09733	0.08615	0.21779	0.79568	0.29677	0.16058	0.28654	0.72673	0.28629	0.05994	0.20434	0.14892	0.97182	0.27116	0.20994	0.85443	0.4537	0.04927	0.43121	0.13606	0.02157	0.07764	0.08856	0.18666	0.40679	0.57797	0.82989
QGC.Lacom11.Unk1	avgbs_24735.1.17	0.0798403				0.12101	0.49698	0.66103	0.41949	0.00024009	0.30649	0.56354	0.73417	7.0572e-05	0.72842	5.2731e-07	0.43401	0.4846	0.739	0.46508	0.13276	0.68723	0.09815	0.82833	0.29104	0.62908	0.23938	0.19987	0.59027	0.60024	0.27384	0.1664	0.22777	0.41482	0.63062	0.69541	0.41587	0.62516	0.40463	0.25097	0.62206	0.10478	0.64312	0.14294	0.11997	0.82935	0.42383	0.84171	0.891
QGC.Lacom11.Unk1	avgbs2_127310.1.41	0.0798403				0.08279	0.37608	0.58391	0.566	0.00043677	0.06494	0.45298	0.72565	4.6317e-05	0.58969	5.5925e-07	0.78489	0.50594	0.83596	0.19773	0.27787	0.6916	0.15036	0.83619	0.46316	0.979	0.33067	0.33742	0.65014	0.59674	0.40894	0.22639	0.40288	0.53034	0.91638	0.92825	0.35107	0.47649	0.27258	0.20004	0.3896	0.10975	0.61764	0.14501	0.96971	0.68852	0.51463	0.95907	0.65792
QGC.Lacom11.Unk1	avgbs_43318.1.28	0.0818363				0.05052	0.90113	0.71684	0.23219	0.00024043	0.25089	0.06066	0.76539	2.2691e-05	0.4336	8.6171e-07	0.26036	0.49235	0.78212	0.57706	0.13312	0.35049	0.11254	0.86574	0.28947	0.55332	0.23184	0.12381	0.4698	0.48731	0.30815	0.1169	0.15697	0.42381	0.78115	0.81489	0.13401	0.90521	0.16678	0.14982	0.40281	0.06887	0.56069	0.22145	0.06558	0.97522	0.3127	0.32905	0.26425
QGC.Lacom11.Unk1	avgbs2_87435.1.60	0.0858283				0.0182	0.77266	0.11779	0.01614	0.0002362	0.03602	0.48296	0.60457	7.3304e-05	0.79086	1.7241e-07	0.52765	0.41923	0.04856	0.33181	0.09522	0.58085	0.03514	0.16111	0.22462	0.12779	0.26587	0.08531	0.11158	0.46789	0.06274	0.09849	0.05303	0.17234	0.83149	0.07203	0.1877	0.07699	0.37816	0.18138	0.28293	0.04249	0.54774	0.29764	0.0362	0.11	0.10353	0.85376	0.90366
QGC.Lacom11.Unk1	avgbs2_124382.1.32	0.0918164				0.05243	0.95253	0.63614	0.17048	0.00028275	0.24563	0.2867	0.58103	7.907e-05	0.57175	2.9161e-07	0.4164	0.3572	0.60572	0.54116	0.20824	0.55347	0.08165	0.8619	0.43998	0.91498	0.31917	0.24383	0.63723	0.56296	0.30151	0.1716	0.33562	0.42598	0.83927	0.81563	0.42447	0.7709	0.49752	0.18919	0.69061	0.08913	0.63867	0.25875	0.36303	0.66119	0.67988	0.96955	0.2112
QGC.Lacom11.Unk1	avgbs_107316.1.48	0.0938124				0.1112	0.68145	0.59265	0.55206	0.00022425	0.5075	0.3389	0.60469	2.2494e-05	0.37905	2.5829e-07	0.95071	0.32722	0.72605	0.05021	0.26104	0.63346	0.22315	0.51034	0.59644	0.89559	0.44053	0.39938	0.7065	0.72348	0.51928	0.29876	0.48204	0.48456	0.7368	0.76343	0.44122	0.60489	0.51071	0.25661	0.06819	0.07884	0.74987	0.21939	0.25379	0.60626	0.69283	0.08867	0.90462
QGC.Lacom11.Unk1	avgbs_23870.1.40	0.0938124				0.40903	0.14796	0.79477	0.51062	0.00488	0.29301	0.76362	0.23536	0.00062028	0.03703	3.4118e-07	0.01706	0.25891	0.11323	0.47841	0.55306	0.78761	0.5717	0.60844	0.20179	0.72379	0.54047	0.36673	0.83775	0.18596	0.85583	0.18041	0.34043	0.59377	0.88732	0.69656	0.07399	0.81839	0.69118	0.262	0.23259	0.09871	0.12608	0.34397	0.66898	0.51618	0.26662	0.70433	0.64525
QGC.Lacom11.Unk1	avgbs_108292.1.56	0.0978044				0.11406	0.81057	0.5448	0.53952	0.00022235	0.74607	0.36763	0.57855	2.8585e-05	0.4628	3.4621e-07	0.9608	0.29355	0.73012	0.14753	0.1666	0.6613	0.14912	0.67228	0.42932	0.90209	0.32368	0.24154	0.58416	0.68224	0.31902	0.22792	0.43725	0.48549	0.62699	0.82031	0.22919	0.71113	0.4321	0.19826	0.18125	0.07064	0.66435	0.21652	0.40021	0.87902	0.50364	0.04499	0.92079
QGC.Lacom11.Unk1	avgbs2_93263.2.63	0.0978044				0.12092	0.84446	0.52376	0.38743	0.00028819	0.83779	0.40824	0.8591	2.7636e-05	0.31001	2.5678e-07	0.4237	0.59831	0.29152	0.1002	0.08015	0.63417	0.09414	0.68472	0.26363	0.99273	0.1592	0.16234	0.78252	0.60236	0.25837	0.18342	0.33536	0.3214	0.84269	0.65087	0.28757	0.74131	0.26198	0.16561	0.60179	0.07499	0.472	0.2853	0.90458	0.72815	0.38398	0.59129	0.2102
QGC.Lacom11.Unk1	avgbs_11217.1.41	0.105788				0.02856	0.89674	0.24455	0.13896	0.0001805	0.2319	0.15101	0.53548	5.6058e-05	0.56379	2.7161e-07	0.21811	0.37425	0.39077	0.6472	0.15924	0.77367	0.05758	0.41916	0.3564	0.95177	0.30286	0.21243	0.28853	0.61452	0.23894	0.14625	0.18245	0.12385	0.22833	0.37393	0.48057	0.76586	0.45235	0.19441	0.66488	0.12769	0.64712	0.23814	0.85717	0.56002	0.65146	0.65412	0.78186
QGC.Lacom11.Unk1	avgbs2_105173.1.26	0.105788				0.03962	0.90207	0.51175	0.0767	0.00045611	0.25795	0.111	0.8075	0.000153	0.6	2.6117e-07	0.86957	0.5256	0.88679	0.67818	0.127	0.67982	0.04498	0.76012	0.41074	0.99046	0.29569	0.17535	0.47439	0.57774	0.08991	0.22118	0.32672	0.44037	0.56984	0.79165	0.39081	0.99917	0.51394	0.24197	0.61627	0.08892	0.67522	0.33208	0.99412	0.72759	0.76389	0.98533	0.2179
QGC.Lacom11.Unk1	avgbs2_197842.1.29	0.105788				0.01137	0.90975	0.18541	0.04625	0.00022097	0.14888	0.12996	0.66661	2.2468e-05	0.69362	2.4949e-07	0.10039	0.39975	0.75793	0.76176	0.10513	0.58785	0.03517	0.29317	0.28902	0.90098	0.32523	0.17302	0.13694	0.65597	0.09401	0.16065	0.27127	0.45359	0.47222	0.1059	0.33648	0.67027	0.52806	0.19743	0.5208	0.07481	0.68201	0.38538	0.61578	0.34125	0.57285	0.89054	0.26941
QGC.Lacom11.Unk1	avgbs_110149.1.15	0.10978				0.01046	0.9377	0.30308	0.02917	8.8992e-05	0.2688	0.54892	0.04839	1.1353e-05	0.56759	1.9073e-07	0.47648	0.13274	0.27572	0.68051	0.05789	0.76801	0.10505	0.26972	0.22253	0.70373	0.05796	0.016	0.17148	0.14713	0.06759	0.03037	0.05596	0.04495	0.03836	0.21328	0.06871	0.7071	0.0562	0.00082694	0.92654	0.00816	0.02723	0.21301	0.92709	0.01033	0.0472	0.258	0.69074
QGC.Lacom11.Unk1	avgbs_6336.1.36	0.111776				0.08163	0.85506	0.53176	0.41379	0.00013552	0.42854	0.42805	0.57061	3.4732e-05	0.43757	2.3309e-07	0.5797	0.37045	0.30429	0.73682	0.16008	0.80618	0.12849	0.97572	0.40546	0.91849	0.30323	0.22655	0.63925	0.7127	0.2433	0.20845	0.13548	0.40265	0.8659	0.48614	0.45984	0.82545	0.43013	0.1382	0.63117	0.06603	0.4991	0.15594	0.72421	0.77829	0.50213	0.97414	0.31353
QGC.Lacom11.Unk1	avgbs_cluster_37758.1.25	0.113772				0.05404	0.68684	0.35501	0.58419	0.00022568	0.25318	0.54998	0.18805	9.2998e-05	0.38259	8.4797e-08	0.62872	0.14279	0.58918	0.39839	0.11086	0.4053	0.07766	0.5567	0.37026	0.39222	0.25817	0.07484	0.66653	0.30778	0.16709	0.04803	0.10058	0.28833	0.70969	0.33106	0.37181	0.19074	0.44679	0.07582	0.73633	0.01635	0.49422	0.05275	0.12013	0.32426	0.71938	0.92839	0.39424
QGC.Lacom11.Unk1	avgbs_cluster_40380.1.37	0.113772				0.10759	0.95948	0.6943	0.19086	0.00017469	0.99234	0.44731	0.52891	1.8013e-05	0.65958	3.7958e-07	0.55964	0.31331	0.98817	0.51202	0.00716	0.5783	0.02236	0.06681	0.00912	0.25727	0.05905	0.00618	0.34101	0.1657	0.05017	0.01656	0.05163	0.02407	0.56046	0.22735	0.01519	0.3117	0.20228	0.00605	0.53082	0.03564	0.14658	0.07411	0.37786	0.10489	0.00363	0.9755	0.21226
QGC.Lacom11.Unk1	avgbs_84661.1.19	0.115768				0.04952	0.94536	0.46021	0.08313	0.00017419	0.21152	0.41566	0.76349	2.5925e-05	0.65583	5.1159e-07	0.52035	0.53705	0.59508	0.56059	0.05958	0.71047	0.06104	0.61338	0.22856	0.80778	0.15024	0.16087	0.43199	0.69602	0.22159	0.13355	0.36513	0.34582	0.92089	0.71356	0.25312	0.93406	0.31366	0.1068	0.80861	0.05549	0.46443	0.23345	0.92723	0.71475	0.28774	0.99955	0.58236
QGC.Lacom11.Unk1	avgbs_cluster_6701.1.63	0.115768				0.06497	0.60379	0.45621	0.41107	0.00032136	0.20729	0.31997	0.72147	3.5223e-05	0.60098	9.7812e-07	0.43118	0.58174	0.48163	0.40985	0.1432	0.47107	0.07452	0.90739	0.42587	0.39873	0.24183	0.17962	0.26963	0.47961	0.28075	0.17894	0.16354	0.52819	0.44074	0.82192	0.37008	0.30837	0.38744	0.17948	0.22664	0.0774	0.52661	0.23497	0.4411	0.90102	0.5119	0.95926	0.43671
QGC.Lacom11.Unk1	avgbs2_69470.1.6	0.115768				0.0487	0.97727	0.45166	0.08715	0.0002784	0.31929	0.35117	0.72072	6.4604e-05	0.73168	3.6957e-07	0.53654	0.54117	0.54829	0.52044	0.20652	0.46649	0.07063	0.46334	0.54313	0.82988	0.31397	0.33122	0.34832	0.7409	0.23659	0.31275	0.42522	0.37755	0.42966	0.34383	0.55636	0.58391	0.40261	0.28076	0.34611	0.09546	0.72744	0.37054	0.55708	0.51964	0.72597	0.95843	0.31325
QGC.Lacom11.Unk1	avgbs_114282.1.21	0.117764				0.09305	0.4948	0.57934	0.48342	5.3812e-05	0.28136	0.4292	0.64629	4.5486e-05	0.55862	1.1525e-07	0.3839	0.40754	0.16912	0.52361	0.05106	0.75554	0.03919	0.14134	0.03651	0.40893	0.14943	0.06701	0.39494	0.41089	0.0631	0.05119	0.15495	0.16783	0.95258	0.20974	0.06831	0.62631	0.21222	0.01057	0.29435	0.0149	0.42119	0.1828	0.02266	0.07355	0.00336	0.82969	0.81586
QGC.Lacom11.Unk1	avgbs_cluster_26392.1.20	0.117764				0.04272	0.97128	0.5037	0.09281	0.00030386	0.30369	0.36107	0.67368	5.3593e-05	0.73605	1.9445e-07	0.57652	0.37818	0.58437	0.62943	0.41045	0.6146	0.18079	0.8975	0.66407	0.74107	0.5603	0.44164	0.65297	0.72696	0.40433	0.35457	0.31066	0.59821	0.87114	0.93156	0.62961	0.69529	0.66205	0.18291	0.42918	0.09745	0.60667	0.20191	0.63233	0.63894	0.5602	0.98031	0.82148
QGC.Lacom11.Unk1	avgbs_cluster_5562.1.15	0.117764				0.07833	0.74273	0.71718	0.04032	0.00044905	0.51217	0.28674	0.74926	4.2948e-05	0.64214	7.9074e-07	0.5135	0.47249	0.30071	0.50626	0.14538	0.59809	0.07122	0.81054	0.44778	0.66103	0.22572	0.23156	0.49293	0.44924	0.24666	0.18502	0.24585	0.35859	0.77909	0.96051	0.57218	0.55252	0.45283	0.17684	0.68762	0.05043	0.56605	0.29927	0.73591	0.5468	0.47279	0.95854	0.74234
QGC.Lacom11.Unk1	avgbs_19671.1.12	0.11976				0.02504	0.99769	0.4027	0.1135	7.8271e-05	0.20904	0.27303	0.42597	6.6123e-05	0.45167	3.7525e-07	0.8552	0.32151	0.9952	0.52928	0.154	0.52664	0.0928	0.5856	0.34158	0.84028	0.32133	0.21897	0.55076	0.64539	0.29004	0.20141	0.32689	0.46972	0.31523	0.79787	0.33065	0.61511	0.36773	0.10385	0.61194	0.04259	0.56022	0.19104	0.94188	0.42739	0.26756	0.67448	0.75207
QGC.Lacom11.Unk1	avgbs_cluster_10358.1.40	0.11976				0.05523	0.95075	0.46604	0.11052	0.00039237	0.46133	0.42333	0.71244	1.233e-05	0.5888	4.8652e-07	0.47497	0.44572	0.63997	0.61812	0.16074	0.593	0.07155	0.61665	0.42896	0.92962	0.25369	0.14061	0.33098	0.56166	0.11809	0.08408	0.26903	0.25357	0.80346	0.38163	0.33356	0.82502	0.46473	0.24983	0.39542	0.17229	0.56765	0.21661	0.75518	0.83679	0.72214	0.98369	0.30617
QGC.Lacom11.Unk1	avgbs_cluster_31433.1.24	0.11976				0.05674	0.55688	0.51034	0.04895	0.00014764	0.60693	0.4841	0.64326	1.2902e-05	0.4443	6.1158e-07	0.9311	0.42102	0.87933	0.72685	0.15201	0.5843	0.08721	0.77093	0.45674	0.58019	0.25209	0.22793	0.70828	0.54415	0.28219	0.22492	0.37729	0.39231	0.4619	0.84395	0.28603	0.42221	0.40346	0.2289	0.74405	0.07106	0.59809	0.26139	0.62334	0.89932	0.66154	0.98523	0.8367
QGC.Lacom11.Unk1	avgbs_110332.1.34	0.121756				0.06742	0.78393	0.4436	0.38882	9.9918e-05	0.10218	0.41392	0.51858	7.1489e-06	0.09527	2.9824e-08	0.01182	0.2599	0.89362	0.53174	0.09432	0.07233	0.0648	0.50592	0.26681	0.65979	0.1614	0.15593	0.28706	0.32545	0.2259	0.21686	0.27843	0.19461	0.73138	0.3568	0.22284	0.48875	0.39004	0.15372	0.8061	0.04825	0.60785	0.20567	0.79167	0.19763	0.39049	0.93117	0.45846
QGC.Lacom11.Unk1	avgbs_110684.1.7	0.121756				0.09256	0.99885	0.72119	0.1086	0.00028605	0.5647	0.37564	0.5908	0.00013416	0.43984	6.5789e-07	0.76428	0.42369	0.59685	0.62574	0.1806	0.62013	0.10077	0.89436	0.43792	0.59294	0.28998	0.2147	0.51337	0.58937	0.17348	0.18422	0.36031	0.42713	0.40642	0.7335	0.42237	0.62946	0.43744	0.21557	0.63695	0.03959	0.67891	0.30655	0.87698	0.83351	0.56347	0.9165	0.71566
QGC.Lacom11.Unk1	avgbs_cluster_20727.1.17	0.123752				0.02056	0.9551	0.46528	0.05235	8.6057e-05	0.29846	0.26641	0.5454	8.1813e-05	0.42566	3.295e-07	0.8117	0.36125	0.59296	0.49062	0.19853	0.51547	0.12252	0.80931	0.41414	0.81733	0.29284	0.29495	0.50308	0.64463	0.34551	0.17896	0.30816	0.36081	0.41723	0.67517	0.4714	0.70659	0.42738	0.12637	0.62992	0.07274	0.29495	0.21227	0.96024	0.70437	0.21364	0.91595	0.71924
QGC.Lacom11.Unk1	avgbs_cluster_29357.1.31	0.123752				0.08081	0.83562	0.55958	0.36064	0.00020824	0.64437	0.44895	0.85366	0.00014341	0.61339	8.396e-07	0.90034	0.59348	0.86957	0.50221	0.16989	0.63157	0.05449	0.55391	0.44719	0.47977	0.27906	0.17093	0.29787	0.51339	0.15493	0.20374	0.25667	0.3067	0.60757	0.57897	0.46084	0.48507	0.38012	0.198	0.51433	0.10865	0.28138	0.26091	0.98498	0.73517	0.62327	0.97436	0.43269
QGC.Lacom11.Unk1	avgbs_23704.1.7	0.125749				0.09378	0.97456	0.56385	0.25737	0.00032582	0.52984	0.32663	0.67084	6.4713e-05	0.60359	1.7746e-07	0.31668	0.4167	0.8431	0.65457	0.0868	0.7091	0.02133	0.50655	0.28574	0.4773	0.20458	0.18156	0.47014	0.63217	0.12208	0.16429	0.31107	0.42016	0.23629	0.4112	0.26328	0.32646	0.35575	0.22821	0.6162	0.11806	0.72841	0.24029	0.86431	0.90544	0.54666	0.92806	0.67414
QGC.Lacom11.Unk1	avgbs2_132486.1.53	0.125749				0.14119	0.97857	0.61961	0.12062	0.00057924	0.30311	0.54679	0.78663	0.00020401	0.58897	8.6842e-07	0.85361	0.59047	0.85416	0.69672	0.10847	0.72066	0.04442	0.68281	0.35439	0.66642	0.20359	0.17385	0.65492	0.80564	0.16955	0.18546	0.1673	0.19916	0.76474	0.61328	0.30494	0.55179	0.28756	0.10999	0.61191	0.08564	0.59178	0.09896	0.94975	0.94289	0.34665	0.8709	0.36929
QGC.Lacom11.Unk1	avgbs_24446.1.13	0.129741				0.08137	0.6332	0.66078	0.14486	6.7279e-05	0.5599	0.51038	0.85483	5.6719e-05	0.66217	1.9079e-07	0.46225	0.58933	0.90634	0.6045	0.10903	0.64338	0.07321	0.90049	0.30441	0.88037	0.22833	0.12774	0.44718	0.6178	0.17371	0.10759	0.1799	0.30739	0.71203	0.90779	0.25604	0.70344	0.35758	0.08281	0.51988	0.04489	0.33681	0.17884	0.75075	0.63266	0.38412	0.85186	0.34308
QGC.Lacom11.Unk1	avgbs_cluster_10360.1.39	0.129741				0.06223	0.95063	0.51656	0.28461	0.00028453	0.68111	0.34667	0.61398	0.00012714	0.82681	5.4443e-07	0.8314	0.41043	0.92423	0.48221	0.33292	0.60193	0.12696	0.73407	0.58999	0.58062	0.40834	0.25298	0.49568	0.60972	0.33728	0.21809	0.26061	0.39455	0.41572	0.47581	0.42571	0.3871	0.46017	0.26344	0.66898	0.12306	0.51503	0.23923	0.4505	0.78616	0.56916	0.31249	0.63447
QGC.Lacom11.Unk1	avgbs2_48055.2.14	0.129741				0.03378	0.63691	0.09206	0.04986	0.00024907	0.51565	0.535	0.56851	0.00012217	0.13096	4.6859e-07	0.71913	0.54755	0.55196	0.36697	0.13024	0.55891	0.03207	0.60948	0.10766	0.67322	0.1332	0.08682	0.14385	0.23912	0.18405	0.0391	0.06721	0.30392	0.2332	0.12072	0.08625	0.30936	0.17343	0.03581	0.29349	0.04652	0.09254	0.05476	0.91044	0.10274	0.11782	0.57009	0.81808
QGC.Lacom11.Unk1	avgbs_67436.1.40	0.131737				0.02751	0.76261	0.39403	0.08316	0.00014791	0.6926	0.14821	0.26404	4.0096e-05	0.10884	4.7628e-07	0.57472	0.2616	0.71595	0.28287	0.07136	0.52361	0.07185	0.99539	0.28919	0.84915	0.19855	0.14054	0.33437	0.60884	0.18591	0.18794	0.22365	0.36548	0.23423	0.87264	0.3578	0.98504	0.32971	0.09733	0.67088	0.02752	0.2726	0.27753	0.43367	0.89092	0.66991	0.43042	0.48311
QGC.Lacom11.Unk1	avgbs_cluster_10360.1.9	0.133733				0.0586	0.95087	0.5436	0.12785	0.0002837	0.62485	0.45706	0.77502	0.00012705	0.73789	6.7737e-07	0.88894	0.53853	0.73464	0.46035	0.35687	0.6169	0.16256	0.90393	0.62572	0.66647	0.43331	0.32784	0.62906	0.64055	0.37857	0.29467	0.41333	0.48344	0.91691	0.93728	0.55657	0.57086	0.49089	0.24477	0.65279	0.13356	0.69769	0.20532	0.70579	0.64018	0.59493	0.95303	0.65081
QGC.Lacom11.Unk1	avgbs2_85810.1.10	0.135729				0.03069	0.85609	0.51145	0.03986	0.00033155	0.21589	0.32801	0.89353	5.8048e-06	0.64029	6.1349e-07	0.49335	0.64317	0.53698	0.53129	0.13653	0.61048	0.10767	0.71748	0.48133	0.69225	0.30718	0.1753	0.39405	0.62846	0.23563	0.18453	0.27897	0.49158	0.44173	0.62659	0.40127	0.72381	0.46859	0.1529	0.58304	0.08543	0.64377	0.31085	0.60747	0.60413	0.6112	0.99466	0.93365
QGC.Lacom11.Unk1	avgbs_cluster_6016.1.16	0.141717				0.04517	0.97025	0.27125	0.08704	0.00048663	0.42165	0.45492	0.66401	3.9165e-05	0.40546	8.9247e-07	0.3161	0.49771	0.90995	0.65967	0.1601	0.70431	0.05563	0.58216	0.42567	0.53822	0.29755	0.19059	0.31304	0.57052	0.1658	0.17661	0.34482	0.3432	0.34034	0.32178	0.35219	0.39183	0.42917	0.17113	0.56371	0.06923	0.5394	0.3648	0.71017	0.56773	0.69682	0.9428	0.67593
QGC.Lacom11.Unk1	avgbs_110141.1.19	0.143713				0.05268	0.97184	0.4631	0.11226	0.00022525	0.24637	0.41685	0.76328	2.3082e-05	0.58129	5.9574e-08	0.83719	0.51828	0.84335	0.64729	0.11203	0.64808	0.03551	0.5851	0.40168	0.84463	0.20135	0.15868	0.40299	0.64359	0.12021	0.19364	0.30452	0.32121	0.5653	0.49687	0.28005	0.80627	0.32266	0.14711	0.53833	0.06126	0.49644	0.17445	0.86884	0.66662	0.40952	0.9661	0.51551
QGC.Lacom11.Unk1	avgbs_cluster_17396.1.15	0.143713				0.06901	0.97494	0.54179	0.10496	0.00024666	0.45011	0.6008	0.73443	4.8805e-05	0.67133	5.2836e-07	0.8219	0.48585	0.82437	0.65705	0.11648	0.59642	0.04059	0.57635	0.37111	0.63015	0.30067	0.20092	0.26962	0.7628	0.14121	0.18185	0.41296	0.34801	0.54307	0.47659	0.31039	0.57395	0.46061	0.16529	0.51866	0.0969	0.38594	0.1864	0.83062	0.86518	0.58951	0.98607	0.62984
QGC.Lacom11.Unk1	avgbs_cluster_10806.1.61	0.151697				0.02625	0.686	0.31682	0.06338	0.00018151	0.43687	0.23657	0.69075	5.9625e-05	0.43392	1.3593e-07	0.96634	0.43545	0.74507	0.55265	0.12489	0.77376	0.08833	0.76141	0.36606	0.74987	0.20106	0.15665	0.62628	0.5844	0.23975	0.12474	0.35726	0.36367	0.27046	0.75057	0.35397	0.67713	0.35819	0.15672	0.6655	0.0601	0.57921	0.18353	0.8517	0.69926	0.40089	0.9344	0.51557
QGC.Lacom11.Unk1	avgbs_cluster_2798.1.36	0.151697				0.05895	0.93474	0.58783	0.5345	7.1948e-05	0.27975	0.44433	0.77168	8.557e-05	0.5971	1.5235e-07	0.55907	0.5695	0.20045	0.38116	0.01488	0.69375	0.02659	0.09322	0.02597	0.43589	0.04922	0.01931	0.30821	0.32018	0.03822	0.03186	0.04375	0.0484	0.31583	0.20381	0.04493	0.62542	0.15702	0.01472	0.60518	0.02525	0.21005	0.11846	0.18133	0.16548	0.00457	0.76519	0.5038
QGC.Lacom11.Unk1	avgbs2_121998.1.21	0.153693				0.08281	0.73641	0.59527	0.27351	0.00024951	0.40163	0.50275	0.73062	2.1497e-05	0.77371	4.3078e-08	0.91563	0.33692	0.94832	0.62963	0.10658	0.74318	0.03502	0.91093	0.29793	0.80203	0.23781	0.16802	0.36962	0.68882	0.12134	0.10744	0.252	0.32932	0.94437	0.88155	0.29344	0.73697	0.42768	0.10246	0.74697	0.09383	0.42396	0.14241	0.92388	0.47149	0.40271	0.99673	0.74124
QGC.Lacom11.Unk1	avgbs_14139.1.29	0.159681				0.08651	0.80251	0.73472	0.62152	0.00021627	0.643	0.45984	0.47356	3.8987e-05	0.66099	6.3195e-07	0.74596	0.51473	0.41046	0.52811	0.0839	0.41566	0.0608	0.21772	0.15952	0.30295	0.27366	0.05748	0.36921	0.57357	0.12996	0.11146	0.30946	0.05029	0.39204	0.06293	0.0831	0.29654	0.42779	0.23111	0.5459	0.12299	0.38483	0.3064	0.87302	0.87145	0.52844	0.48901	0.76815
QGC.Lacom11.Unk1	avgbs_7459.1.37	0.161677				0.05858	0.93079	0.45014	0.70731	7.8206e-05	0.81833	0.2442	0.56811	5.2366e-05	0.33507	2.9454e-08	0.27104	0.25686	0.14025	0.78142	0.1898	0.62998	0.12736	0.99245	0.25985	0.40894	0.18425	0.16933	0.56639	0.34795	0.23282	0.10505	0.24782	0.40217	0.64413	0.95351	0.20074	0.79785	0.25819	0.08688	0.74657	0.0417	0.55569	0.36406	0.10828	0.73481	0.30152	0.85337	0.90458
QGC.Lacom11.Unk1	avgbs_89451.1.51	0.177645				0.04602	0.99474	0.41779	0.59496	6.3783e-05	0.47474	0.39588	0.60261	0.00010294	0.65347	3.9541e-07	0.75419	0.35573	0.6122	0.7386	0.082	0.54431	0.0666	0.15299	0.28143	0.69669	0.22215	0.1748	0.17867	0.21521	0.25101	0.10556	0.16875	0.40885	0.98835	0.79689	0.3198	0.68796	0.44876	0.14288	0.44923	0.04777	0.26839	0.19125	0.99994	0.59799	0.69757	0.94923	0.91183
QGC.Lacom11.Unk1	avgbs_cluster_38252.1.33	0.181637				0.1258	0.77651	0.16184	0.66337	0.00018594	0.99354	0.21594	0.78861	1.0261e-05	0.41888	2.5403e-07	0.9014	0.48794	0.62483	0.56882	0.0138	0.74317	0.02405	0.12386	0.05258	0.03564	0.03848	0.056	0.34228	0.24907	0.05903	0.08958	0.13053	0.16379	0.18018	0.78763	0.155	0.06363	0.15061	0.0442	0.53548	0.01342	0.44352	0.25246	0.62537	0.17147	0.1792	0.41877	0.33592
QGC.Lacom11.Unk1	avgbs2_3196.1.21	0.181637				0.09787	0.95579	0.61281	0.28788	0.00033549	0.25482	0.54865	0.52166	0.00022652	0.61057	4.3907e-08	0.52655	0.2423	0.36919	0.29037	0.109	0.36923	0.07211	0.20414	0.34016	0.64034	0.21384	0.13565	0.1634	0.55448	0.23236	0.14901	0.09194	0.25815	0.56891	0.62844	0.34058	0.73095	0.43269	0.23864	0.06964	0.05193	0.63541	0.36803	0.56506	0.49113	0.63304	0.87189	0.88465
QGC.Lacom11.Unk1	avgbs2_53876.1.16	0.189621				0.0131	0.93948	0.06236	0.01704	0.00018098	0.32499	0.44956	0.39	3.2361e-05	0.08327	2.4761e-07	0.22208	0.28024	0.85458	0.64727	0.19524	0.63693	0.11197	0.5584	0.29731	0.96103	0.27626	0.19926	0.55345	0.44086	0.31765	0.1394	0.27253	0.50914	0.52112	0.22418	0.21172	0.98483	0.36559	0.04683	0.33183	0.06906	0.23057	0.21808	0.87139	0.05224	0.04169	0.86472	0.92309
QGC.Lacom11.Unk1	avgbs_123119.1.36	0.191617				0.06055	0.98408	0.57524	0.04677	4.5696e-05	0.12673	0.51346	0.70241	2.6064e-05	0.42463	7.7956e-08	0.4091	0.43235	0.16098	0.67839	0.07117	0.35815	0.05016	0.42233	0.16765	0.74676	0.29248	0.16034	0.47316	0.68846	0.08082	0.13683	0.35077	0.29979	0.35707	0.97705	0.32078	0.75595	0.47587	0.16104	0.56431	0.06859	0.44014	0.31277	0.3843	0.9893	0.44213	0.94214	0.94887
QGC.Lacom11.Unk1	avgbs_cluster_17503.1.62	0.201597				0.11696	0.77111	0.30485	0.40636	0.00036268	0.6019	0.25699	0.68905	8.4214e-05	0.1414	7.23e-07	0.96565	0.52083	0.32227	0.09669	0.26448	0.67771	0.11003	0.64736	0.53139	0.71008	0.36149	0.32486	0.62306	0.76596	0.14079	0.19771	0.30394	0.43532	0.39845	0.75879	0.45575	0.91375	0.41309	0.24078	0.65553	0.08954	0.7534	0.24206	0.49216	0.64087	0.63161	0.83238	0.66424
QGC.Lacom11.Unk1	avgbs_cluster_8381.1.14	0.207585				0.07871	0.45927	0.38709	0.09136	0.00021503	0.95862	0.60767	0.56344	0.00012346	0.15604	7.0698e-08	0.63136	0.39172	0.13483	0.54957	0.25311	0.4787	0.18204	0.38256	0.54106	0.57093	0.43505	0.34956	0.55522	0.37819	0.29772	0.34254	0.44044	0.5224	0.71268	0.9079	0.4934	0.95063	0.54279	0.22292	0.71023	0.13095	0.55264	0.21952	0.5327	0.66085	0.24917	0.74952	0.84861
QGC.Lacom11.Unk1	avgbs2_45124.1.14	0.207585				0.08	0.44387	0.4075	0.0905	0.00022218	0.99067	0.61005	0.53142	0.00011445	0.16532	9.2581e-08	0.66757	0.37847	0.14646	0.56848	0.25331	0.48419	0.18167	0.38311	0.5616	0.54493	0.42575	0.35931	0.51545	0.40905	0.28987	0.34643	0.46353	0.52105	0.79228	0.9904	0.51247	0.96809	0.54371	0.20844	0.72286	0.13257	0.57575	0.18796	0.68412	0.75443	0.26495	0.73154	0.80835
QGC.Lacom11.Unk1	avgbs_42010.1.21	0.213573				0.07576	0.54521	0.36153	0.57103	9.1489e-05	0.68655	0.4503	0.42882	1.4731e-05	0.55342	5.6016e-08	0.38618	0.22474	0.01149	0.58546	0.04897	0.17358	0.09967	0.15949	0.23245	0.31966	0.14494	0.13817	0.28445	0.37472	0.36867	0.17886	0.26428	0.24723	0.3306	0.08389	0.20751	0.43944	0.30411	0.06951	0.64103	0.02832	0.63974	0.15771	0.19813	0.5915	0.43061	0.97934	0.10791
QGC.Lacom11.Unk1	avgbs_cluster_7631.1.48	0.223553				0.08271	0.93219	0.6325	0.04143	0.00033402	0.00989	0.51626	0.78442	8.834e-05	0.55598	8.3674e-07	0.29455	0.53868	0.57512	0.51454	0.12412	0.35649	0.06483	0.22165	0.24513	0.53093	0.32633	0.23061	0.27043	0.61896	0.08083	0.08338	0.26879	0.35642	0.45076	0.81587	0.42365	0.39968	0.44732	0.17195	0.5332	0.08852	0.43876	0.16679	0.4694	0.87033	0.61572	0.96005	0.84662
QGC.Lacom11.Unk1	avgbs2_113168.1.12	0.253493				0.06972	0.94813	0.61183	0.57336	0.00010156	0.13029	0.55233	0.62681	1.4494e-05	0.17479	5.2214e-07	0.94358	0.32908	0.64742	0.52999	0.18859	0.71021	0.16977	0.66754	0.46434	0.65074	0.23194	0.20105	0.44289	0.58362	0.30927	0.17955	0.17457	0.40082	0.64199	0.6683	0.46535	0.59158	0.4086	0.13864	0.58086	0.16295	0.29973	0.2869	0.55733	0.71459	0.53517	0.96837	0.1521
QGC.Lacom11.Unk1	avgbs2_169469.1.27	0.255489				0.11221	0.30868	0.6576	0.47412	7.3975e-05	0.64184	0.53238	0.79564	5.9075e-05	0.50424	2.5666e-07	0.42032	0.52687	0.64991	0.51664	0.05438	0.61192	0.06427	0.66193	0.25798	0.93746	0.09784	0.0747	0.54008	0.48685	0.15179	0.10095	0.22145	0.14379	0.31648	0.55568	0.29594	0.76276	0.17515	0.09061	0.72205	0.04631	0.2887	0.25821	0.41069	0.65903	0.5001	0.93156	0.33074
QGC.Lacom11.Unk1	avgbs_23461.1.37	0.261477				0.07365	0.98039	0.53854	0.42741	7.4924e-05	0.55607	0.29522	0.574	2.2006e-05	0.16908	3.3483e-07	0.1591	0.30441	0.53573	0.63972	0.12053	0.74592	0.09859	0.85768	0.35104	0.24559	0.21796	0.22302	0.48419	0.46108	0.19698	0.16861	0.38727	0.50657	0.55102	0.52375	0.38282	0.2503	0.33981	0.17822	0.7874	0.05256	0.61443	0.29913	0.4429	0.85512	0.53392	0.625	0.90791
QGC.Lacom11.Unk1	avgbs_84300.1.44	0.273453				0.01427	0.10066	0.13627	0.2835	2.7597e-05	0.27757	0.06233	0.03858	0.00331	0.00429	8.4314e-07	0.00145	0.07389	0.24389	0.12126	0.40034	0.62725	0.3339	0.95739	0.42286	0.73068	0.35074	0.67752	0.42819	0.27216	0.1947	0.6275	0.59393	0.72392	0.84778	0.8084	0.69609	0.75928	0.50421	0.62554	0.91365	0.21262	0.92855	0.42325	0.1805	0.92264	0.59396	0.09506	0.59979
QGC.Lacom11.Unk1	avgbs_cluster_34712.1.54	0.277445				0.08962	0.70153	0.69202	0.61169	0.00010844	0.38904	0.48815	0.62343	2.9292e-05	0.37326	2.2229e-07	0.88588	0.27967	0.85653	0.77149	0.12608	0.76633	0.06289	0.66902	0.26082	0.9119	0.2723	0.16634	0.48833	0.54125	0.21725	0.14202	0.26382	0.27427	0.8287	0.98551	0.34269	0.94309	0.3882	0.08528	0.81821	0.07764	0.19888	0.20553	0.91551	0.51656	0.23797	0.95489	0.19705
QGC.Lacom11.Unk1	avgbs_cluster_13006.1.7	0.285429				0.10581	0.69908	0.57972	0.52691	0.00015764	0.50859	0.52784	0.63575	3.8466e-05	0.53813	8.0402e-08	0.81614	0.45291	0.70447	0.74512	0.15394	0.7955	0.14082	0.71952	0.36709	0.65343	0.29013	0.17251	0.55926	0.63555	0.27397	0.14626	0.24665	0.32622	0.75391	0.73562	0.29515	0.47218	0.38972	0.11625	0.54292	0.06165	0.40791	0.17741	0.62707	0.6835	0.45204	0.99329	0.46247
QGC.Lacom11.Unk1	avgbs_79540.1.35	0.291417				0.0828	0.92425	0.35516	0.42167	0.00030697	0.68865	0.34079	0.69314	9.8966e-06	0.87911	5.1527e-07	0.02814	0.4251	0.51509	0.61742	0.05129	0.1125	0.05365	0.41199	0.1515	0.63525	0.1129	0.0592	0.46794	0.3563	0.15064	0.04972	0.13346	0.30115	0.50195	0.65104	0.19226	0.58149	0.23288	0.0408	0.38549	0.02848	0.49803	0.03201	0.37841	0.19141	0.36463	0.53201	0.37834
QGC.Lacom11.Unk1	avgbs_107047.1.18	0.337325				0.11482	0.94364	0.46402	0.63289	0.00041117	0.3719	0.53462	0.66486	6.644e-05	0.24243	3.9446e-07	0.82849	0.36471	0.75264	0.63982	0.16974	0.65044	0.08798	0.55677	0.3943	0.87826	0.31163	0.09845	0.48336	0.17793	0.08615	0.16614	0.15812	0.27031	0.74068	0.28433	0.37911	0.73681	0.31508	0.09702	0.78236	0.00771	0.34876	0.26426	0.92157	0.10593	0.37248	0.94055	0.95462
QGC.Lacom11.Unk1	avgbs_57391.1.26	0.39				0.09378	0.14215	0.68159	0.53328	0.00016402	0.91098	0.06547	0.5393	9.0472e-06	0.43238	3.9343e-08	0.67371	0.27923	0.83698	0.76924	0.18568	0.25286	0.1253	0.86107	0.55159	0.44198	0.15921	0.33416	0.11496	0.64735	0.25792	0.18785	0.3686	0.32059	0.5432	0.20478	0.53649	0.53636	0.33536	0.15291	0.45531	0.04624	0.58776	0.24553	0.53713	0.29132	0.53848	0.88002	0.18559
QGC.Lacom11.Unk2	avgbs_392008.1.17	0.0139721				0.10484	0.6201	0.07336	0.84951	0.00863	0.23027	0.74893	0.1333	1.2905e-06	0.04836	3.052e-08	0.01965	0.00541	0.03827	0.42649	0.36646	0.13147	0.12051	0.29038	0.47945	0.33104	0.5933	0.35328	0.0554	0.4027	0.01909	0.31908	0.88279	0.28026	0.81611	0.11459	0.2245	0.55363	0.77965	0.31419	0.53318	0.45737	0.20425	0.18491	0.84831	0.18144	0.84096	0.00471	0.88063
QGC.Teton11.3A	avgbs_cluster_3791.1.28	0.0558882	Mrg23	Chr3A	104.9	0.06506	0.07689	0.25481	0.56947	0.05029	0.38278	0.1155	4.8392e-05	0.38145	0.77441	0.22661	0.86415	0.00014564	0.81126	0.20189	0.0086	0.02592	0.24783	0.00246	0.03533	7.3269e-07	0.00247	0.00647	0.77098	0.96979	0.04039	0.00526	0.0683	0.0008891	0.94512	0.00427	0.01446	3.1448e-05	0.00262	0.00317	0.08328	0.04716	0.03335	0.07281	0.47811	0.00157	0.00203	0.06041	0.73181
QGC.Teton11.3A	avgbs2_20354.1.28	0.0558882	Mrg23	Chr3A	104.9	0.48794	0.04179	0.53202	0.43796	0.35523	0.33419	0.13947	0.03735	0.37692	0.72622	0.14085	0.63946	0.0198	0.98604	0.09083	0.11338	0.07478	0.34491	0.05473	0.32214	9.1591e-07	0.02774	0.4226	0.27192	0.03291	0.16379	0.32448	0.73176	0.00496	0.98801	0.08814	0.11837	3.0053e-05	0.01905	0.00097172	0.19929	0.04342	0.04601	0.00075628	0.33947	0.00281	0.00234	0.11759	0.31604
QGC.Teton11.Unk	avgbs2_191851.1.24	0.345309	Mrg05	Chr6A	135.5	0.01368	0.00359	0.35417	0.14527	0.01618	0.09416	0.00013291	0.05755	0.60835	3.7815e-05	8.0718e-05	0.00054049	0.09849	1.0283e-05	7.1573e-08	0.12027	0.07402	0.70173	0.27137	0.13381	0.02595	0.01648	0.01414	0.2864	0.65204	0.14245	0.00701	0.01219	0.1074	0.10114	0.04666	0.04115	0.0036	0.00598	0.04285	0.09515	0.31992	0.07261	0.29241	0.03792	0.045	0.03365	0.39454	0.44874
QGC.Teton11.Unk	avgbs_35975.1.10	0.281437	Mrg17	Chr6C	30.3	0.04813	0.9438	0.32193	0.13392	0.34458	0.04575	0.07146	0.03658	0.47209	0.00018102	2.4379e-06	0.00018265	0.01792	0.00072295	3.7394e-07	0.56867	0.81362	0.84891	0.67081	0.47161	0.14802	0.6977	0.51866	0.83668	0.94248	0.96699	0.18276	0.34553	0.56641	0.57841	0.62564	0.34571	0.10671	0.5172	0.54798	0.36556	0.84184	0.03005	0.91786	0.33291	0.27471	0.54079	0.19463	0.51569
QGC.TWT.CORE.Unk	avgbs2_92005.1.47	0.103792				0.73405	0.04588	0.76461	0.28626	0.09048	0.26083	0.95338	1.6654e-13	0.12343	0.68626	0.98609	0.03676	8.9361e-13	0.13556	0.19259	0.00062265	0.11028	0.18602	0.01485	0.05328	0.40194	0.00073657	0.00244	0.47985	0.29544	0.05717	0.22018	0.15719	0.00046249	0.15934	0.03586	0.01742	0.42554	0.00688	0.05984	0.71686	0.01888	0.89821	0.39298	0.12265	0.17927	0.19614	1.9427e-08	0.89859
Qkernel.CORE.4D	avgbs_cluster_22604.1.18	0.0798403				0.56757	0.7552	0.79497	0.34403	0.17016	0.33559	0.6739	6.1656e-13	0.64099	0.42537	0.49664	0.77667	2.1914e-12	0.1838	0.10868	0.00087928	0.392	0.51668	0.00681	0.07626	0.67183	0.00178	0.00562	0.83481	0.34245	0.87163	0.20143	0.29523	0.00176	0.14744	0.03065	0.04962	0.4208	0.01094	0.0458	0.69931	0.02332	0.88131	0.17348	0.05658	0.11009	0.25651	7.4124e-08	0.55477
Qkernel.CORE.4D	avgbs2_23911.1.47	0.0399202	Mrg18	Chr1A	1.1	0.15129	0.22063	0.7896	0.80909	0.02364	0.33258	0.53641	5.5648e-06	0.87857	0.8655	0.06332	0.53096	2.3159e-06	0.34293	0.92463	0.00102	0.44722	0.00046969	0.00015059	0.05787	6.4631e-07	0.00692	0.00645	0.93881	0.45047	0.00046082	0.10305	0.01923	0.00169	0.73692	1.5365e-05	0.00142	2.4318e-06	0.00216	0.00053502	0.6411	0.00222	0.01044	0.00469	0.02832	0.00127	0.01971	0.00382	0.83589
Qkernel.CORE.4D	avgbs_cluster_30065.1.15	0.0199601	Mrg18	Chr1A	4.7	0.0145	0.0877	0.58654	0.30837	0.00919	0.00762	0.58391	2.2321e-06	0.3764	0.26524	0.96931	0.78651	3.3731e-06	0.43186	0.64471	0.0035	0.6417	0.03414	0.00070482	0.02734	4.6337e-05	0.02096	0.08506	0.73505	0.00169	0.06445	0.31124	0.22297	0.05804	0.35599	0.00017913	0.00177	0.00033539	0.01441	0.01032	0.29807	0.05917	0.31983	0.19741	0.07238	0.00315	0.01471	3.0134e-06	0.38547
Qkernel.CORE.4D	avgbs2_165919.1.30	0.0479042	Mrg18	Chr1A	18.1	0.39078	0.28652	0.65633	0.90275	0.04546	0.47647	0.95939	9.2911e-08	0.9618	0.69299	0.32034	0.69663	2.3552e-07	0.16017	0.64673	0.00044684	0.40502	0.00097566	0.00236	0.04263	0.01126	0.00251	0.00347	0.02797	0.85175	0.00114	0.00237	0.05449	0.00162	0.23957	0.00254	0.02796	0.00671	0.00819	0.00049613	0.72508	7.0281e-06	0.00581	0.01612	0.22226	0.01625	0.02573	7.1596e-06	0.00999
Qkernel.CORE.4D	avgbs2_16916.1.11	0.0219561	Mrg18	Chr1A	37.3	0.9662	0.19622	0.95637	0.4949	0.37225	0.95921	0.03243	4.8054e-08	0.55488	0.17632	0.20932	0.06421	6.3392e-07	0.32839	0.21881	0.03776	0.58147	0.03859	0.19635	0.27329	0.00058795	0.02108	0.04215	0.53406	0.64407	0.02917	0.0275	0.16246	0.03625	0.78783	0.26619	0.12228	0.0041	0.01846	0.0007227	0.11863	2.3969e-05	0.02373	0.00823	0.49796	0.00269	0.00423	0.00109	0.60621
Qkernel.CORE.4D	avgbs_87193.1.34	0.0658683	Mrg18	Chr1A	60.1	0.42605	0.55878	0.78992	0.45492	0.27501	0.97849	0.78698	5.8899e-09	0.14068	0.22373	0.32193	0.04114	2.0848e-08	0.72487	0.34653	0.04433	0.58755	0.0331	0.09444	0.33123	0.00020675	0.0212	0.09211	0.62275	0.90064	0.03889	0.0685	0.69402	0.04089	0.97804	0.10484	0.19547	0.00123	0.00909	0.00602	0.01031	0.00011862	0.04406	0.19736	0.65904	0.0032	0.00843	3.2293e-05	0.88114
Qkernel.CORE.4D	avgbs_cluster_44741.1.13	0.213573	Mrg18	Chr1A	69	0.11159	0.74264	0.15199	0.72841	0.06402	0.16419	0.97103	1.8087e-13	0.25323	0.96555	0.43404	0.11527	8.3831e-13	0.34646	0.72266	0.00217	0.37266	0.24197	0.01429	0.11341	0.60981	0.00258	0.00494	0.42729	0.03859	0.38024	0.17671	0.1208	0.00184	0.21118	0.01467	0.0595	0.77605	0.01431	0.02231	0.52835	0.02164	0.55792	0.04449	0.05514	0.04117	0.07773	3.9207e-08	0.12334
Qkernel.CORE.4D	avgbs2_151576.1.12	0.0359281	Mrg28	Chr1C	20.3	0.09029	0.12985	0.66045	0.04719	0.02733	0.67343	0.39114	5.6972e-10	0.35643	0.26326	0.19648	0.6124	2.5039e-09	0.34002	0.92925	9.3493e-05	0.38646	0.00804	0.00048724	0.00228	0.08443	6.7103e-05	0.00965	0.61472	0.50298	0.3321	0.06652	0.04075	0.0011	0.09477	0.04127	0.00747	0.34163	0.00434	0.26406	0.9465	0.19184	0.97232	0.16593	0.24573	0.12926	0.1379	5.7868e-06	0.44831
Qkernel.CORE.4D	avgbs_37910.1.14	0.0578842	Mrg28	Chr1C	43.8	0.76721	0.7632	0.51508	0.59092	0.66107	0.29146	0.25534	1.9923e-07	0.26526	0.81918	0.69718	0.18208	6.5304e-07	0.59094	0.69885	0.01325	0.18538	0.00974	0.02647	0.0668	0.00016978	0.04187	0.05712	0.0071	0.10214	0.02816	0.03495	0.05576	0.10257	0.8206	0.02625	0.02603	0.00056013	0.04772	0.02516	0.62057	0.0432	0.27481	0.34074	0.47112	0.01664	0.00268	0.02678	0.64057
Qkernel.CORE.4D	avgbs2_34623.1.6	0.325349	Mrg28	Chr1C	58.2	0.52532	0.16047	0.30677	0.63063	0.4149	0.7875	0.6166	0.22079	0.31918	0.30468	0.77806	0.18728	0.19128	0.73005	0.67492	0.11674	0.50427	0.56658	0.11061	0.31938	0.29968	0.21361	0.24633	0.84526	0.59244	0.32323	0.29142	0.35293	0.36473	0.90745	0.31095	0.3438	0.34286	0.29551	0.10918	0.58778	0.21716	0.18127	0.02749	0.48149	0.16934	0.70733	0.00101	4.7182e-05
Qkernel.CORE.4D	avgbs2_181079.1.27	0.261477	Mrg28	Chr1C	76	0.11739	0.07827	0.11856	0.0804	0.05371	0.09277	0.23279	4.1091e-09	0.0294	0.93147	0.21468	0.00897	3.7441e-08	0.76339	0.33601	0.01091	0.67978	0.44344	0.14206	0.11697	0.33902	0.00506	0.03803	0.68019	0.96074	0.76902	0.53665	0.25037	0.00441	0.01132	0.26878	0.04574	0.84847	0.01058	0.19984	0.65655	0.05203	0.5534	0.64755	0.11533	0.80449	0.47371	8.8482e-06	0.57083
Qkernel.CORE.4D	avgbs2_111678.1.15	0.219561	Mrg28	Chr1C	89.2	0.62216	0.15485	0.31265	0.6837	0.31448	0.35403	0.45346	1.2929e-09	0.82563	0.13646	0.17637	0.85347	3.7797e-09	0.40172	0.96452	0.00137	0.17038	0.00302	0.00218	0.06846	0.0001234	0.00125	0.00143	0.69274	0.7771	0.00694	0.01905	0.03421	0.0011	0.05792	0.00841	0.01452	0.00265	0.00073365	0.0016	0.00895	0.00048055	0.02839	0.071	0.53198	0.00141	0.00626	0.00013139	0.28471
Qkernel.CORE.4D	avgbs_cluster_32576.1.11	0.0499002	Mrg01	Chr1D	22.5	0.00072189	0.43337	0.1776	0.00523	0.00544	0.00548	0.00283	0.02093	0.62552	4.7762e-05	7.2885e-08	0.00050689	0.00783	7.9671e-06	2.7525e-06	0.09192	0.28429	0.56164	0.26018	0.02683	0.01589	0.069	0.06271	0.68577	0.41473	0.42224	0.08259	0.2314	0.07685	0.09695	0.05432	0.04252	0.01116	0.04513	0.06697	0.2883	0.17752	0.05199	0.15433	0.29273	0.08862	0.00864	0.23089	0.51493
Qkernel.CORE.4D	avgbs2_130063.1.16	0.0179641	Mrg01	Chr1D	57.2	0.29159	0.29551	0.34933	0.76836	0.25657	0.74349	0.58171	8.6678e-05	0.2595	0.90383	0.14904	0.1713	0.00023485	0.73895	0.51603	0.39563	0.93149	0.7154	0.23007	0.47957	0.5076	0.16925	0.07825	0.17932	0.1334	0.406	0.10839	0.06589	0.16458	0.05388	0.12214	0.2176	0.6043	0.07551	0.0034	0.71405	0.13502	0.02042	0.56367	0.55342	0.00466	0.0517	0.01154	0.57211
Qkernel.CORE.4D	avgbs2_102365.1.64	0.367265	Mrg01	Chr1D	57.2	0.26075	0.58572	0.05458	0.31695	0.31121	0.75425	0.32681	1.0593e-07	0.48009	0.34126	0.00196	0.13569	4.8618e-06	0.96336	0.01744	0.08515	0.65961	0.02978	0.02393	0.08118	0.37582	0.2395	0.00101	0.132	0.05992	0.00268	0.01921	0.00448	0.0032	0.14083	0.0012	0.00101	0.26945	0.09447	0.00854	0.14885	0.0063	0.0367	0.3391	0.33246	0.00259	0.00142	0.00477	0.69608
Qkernel.CORE.4D	avgbs_55961.1.31	0.267465	Mrg01	Chr1D	106.6	0.30703	0.91719	0.48184	0.18884	0.57426	0.99977	0.51356	2.2604e-10	0.23082	0.63959	0.37489	0.33872	1.374e-09	0.03886	0.01741	0.00017121	0.37118	0.00137	0.00023125	0.01052	5.576e-06	0.00658	0.00328	0.37071	0.78933	0.01099	0.0084	0.01707	0.01775	0.34597	0.00208	0.00248	0.0001236	0.01739	0.018	0.09002	0.00217	0.69559	0.20007	0.41758	0.00404	0.0019	1.0481e-05	0.71805
Qkernel.CORE.4D	avgbs_cluster_41102.1.44	0.379242	Mrg01	Chr1D	108.4	0.56217	0.55623	0.24584	0.64382	0.99922	0.84949	0.87853	0.59477	0.57769	0.55995	0.92014	0.75771	0.83903	0.83292	0.80664	0.91482	0.93903	0.47681	0.78141	0.88446	0.54262	0.99438	0.98514	0.72868	0.5914	0.52388	0.94683	0.94444	0.88277	0.31556	0.93874	0.63386	0.60299	0.99183	0.23481	0.47355	0.64643	0.07174	0.52888	0.55171	0.78577	0.54275	0.26656	2.9952e-05
Qkernel.CORE.4D	avgbs2_169886.1.63	0.00998004	Mrg01	Chr1D	109	0.16279	0.56737	0.59112	0.15188	0.17467	0.57869	0.74754	2.5489e-06	0.23132	0.84143	0.6314	0.92444	3.5565e-06	0.21219	0.21575	0.12488	0.39439	0.72656	0.01894	0.22486	0.00029947	0.18286	0.57713	0.51464	0.25665	0.84272	0.9643	0.86418	0.4193	0.05948	0.02319	0.49467	0.00077536	0.33037	0.48838	0.75452	0.47746	0.12041	0.81228	0.36483	0.59318	0.84433	3.7383e-06	0.15274
Qkernel.CORE.4D	avgbs2_17190.1.14	0.389222	Mrg01	Chr1D	109	0.54249	0.95709	0.43597	0.31067	0.99049	0.95877	0.86737	0.31833	0.99765	0.07659	0.44011	0.60076	0.55322	0.58682	0.29423	0.87035	0.83914	0.80117	0.87895	0.78021	0.67117	0.97781	0.42557	0.45824	0.71084	0.67046	0.40786	0.50366	0.58137	0.42359	0.89797	0.51136	0.76835	0.95141	0.82411	0.86702	0.71811	0.63502	0.49343	0.95059	0.95847	0.91857	0.01586	0.00074823
Qkernel.CORE.4D	avgbs2_18163.1.23	0.0499002	Mrg01	Chr1D	113.6	0.2103	0.05065	0.10769	0.26296	0.16849	0.74217	0.46232	0.64399	0.91885	0.79385	0.16331	0.96835	0.29589	0.72868	0.48808	0.73956	0.77389	0.65929	0.46259	0.9863	0.41488	0.64774	0.87563	0.01123	0.33776	0.27563	0.67075	0.40237	0.16407	0.97837	0.90665	0.84662	0.64233	0.47113	0.99209	0.27161	0.485	0.42472	0.42784	0.90369	0.77386	0.91774	0.02929	0.0041
Qkernel.CORE.4D	avgbs_22295.1.38	0.371257	Mrg33	Chr2A	44	0.00187	0.00507	0.2473	0.01926	0.00408	0.00783	0.00172	0.00197	0.91725	0.00026572	1.2345e-07	0.00127	0.0012	3.4281e-06	5.035e-07	0.24117	0.08194	0.7083	0.3068	0.16764	0.00129	0.04945	0.03592	0.82281	0.11276	0.29341	0.00697	0.02642	0.0669	0.13705	0.03486	0.09972	0.00061643	0.02096	0.03159	0.29269	0.10496	0.01796	0.10938	0.09378	0.01769	0.09616	0.26261	0.89393
Qkernel.CORE.4D	avgbs_6K_73266.1.11	0.0898204	Mrg33	Chr2A	45.8	0.02572	0.63534	0.17153	0.03078	0.3642	0.10793	0.97365	6.4907e-09	0.71214	0.29302	0.05278	0.6106	4.3735e-08	0.87714	0.39743	0.00052754	0.76936	0.0488	0.04069	0.01785	0.38287	0.00187	0.01296	0.69681	0.70379	0.73276	0.06509	0.43235	0.0029	0.18637	0.19675	0.0441	0.4	0.01407	0.042	0.63057	0.04296	0.82731	0.29079	0.08847	0.1033	0.14177	9.4552e-06	0.93034
Qkernel.CORE.4D	avgbs2_111201.1.45	0.169661	Mrg33	Chr2A	73.4	0.41621	0.71367	0.24757	0.49925	0.88507	0.80141	0.83328	0.78974	0.89088	0.81623	0.45769	0.89918	0.90214	0.45863	0.68098	0.79876	0.08405	0.57135	0.90548	0.99247	0.71355	0.61603	0.88059	0.02621	0.37891	0.39248	0.62178	0.6792	0.18733	0.35595	0.8331	0.80205	0.65233	0.50657	0.91454	0.2967	0.51751	0.46931	0.59701	0.86946	0.90454	0.71268	0.03125	0.00737
Qkernel.CORE.4D	avgbs_111245.1.12	0.0139721	Mrg13	Chr2C	18.2	0.24406	0.74895	0.65047	0.94145	0.69786	0.31149	0.70629	3.151e-07	0.81175	2.2539e-05	0.00048842	0.29679	2.471e-06	0.06551	0.03057	0.02361	0.99979	0.37058	0.00047477	0.00562	0.00462	0.02766	0.0576	0.15589	0.19376	0.90379	0.03007	0.0204	0.43042	0.19638	0.03596	0.02791	0.0158	0.07167	0.0409	0.31393	0.71366	0.42952	0.18524	0.16993	0.03535	0.11025	0.00012123	0.02846
Qkernel.CORE.4D	avgbs_cluster_35932.1.15	0.0319361	Mrg13	Chr2C	35.9	0.98681	0.46166	0.49551	0.99406	0.38358	0.19741	0.23379	1.8785e-09	0.07576	0.51059	0.07266	0.53498	1.1386e-08	0.68679	0.64593	0.00868	0.41271	0.00529	0.05465	0.09391	0.00078402	0.00263	0.03185	0.75526	0.05548	0.01575	0.06124	0.64171	0.02089	0.14261	0.09433	0.08532	0.00914	0.00212	0.00263	0.00511	3.178e-05	0.03743	0.09989	0.27688	0.00243	0.00625	1.1349e-05	0.9014
Qkernel.CORE.4D	avgbs_cluster_31234.1.64	0.0938124	Mrg13	Chr2C	42.1	0.67873	0.82506	0.61138	0.60012	0.3224	0.72451	0.84771	0.73325	0.81889	0.87623	0.17311	0.78657	0.56573	0.67717	0.50676	0.42117	0.46971	0.36067	0.53337	0.50929	0.76692	0.19043	0.6991	0.00811	0.19684	0.28849	0.57853	0.38822	0.32368	0.53368	0.76191	0.59645	0.72867	0.12966	0.84742	0.23752	0.26314	0.27458	0.45319	0.06148	0.53907	0.32242	0.03715	0.0041
Qkernel.CORE.4D	avgbs_6K_109633.1.56	0.0758483	Mrg13	Chr2C	58.5	0.877	0.5697	0.53957	0.562	0.94217	0.36053	0.00282	0.71619	0.86971	0.57947	0.36501	0.58065	0.85435	0.85123	0.65278	0.09402	0.07124	0.17201	0.05914	0.36444	0.13192	0.02502	0.10252	0.02526	0.1384	0.09903	0.08057	0.20591	0.01727	0.10025	0.18867	0.4115	0.22152	0.01864	0.07473	0.0307	0.09296	0.00644	0.25282	0.51881	0.01041	0.12271	0.03734	0.00213
Qkernel.CORE.4D	avgbs_14179.1.20	0.383234	Mrg13	Chr2C	108.5	0.12332	0.86562	0.30165	0.80588	0.51155	0.03246	0.99549	0.96032	0.46456	0.65329	0.12193	0.34237	0.95586	0.87816	0.24884	0.39079	0.9936	0.22918	0.41179	0.60577	0.98947	0.29602	0.5342	0.00093293	0.09294	0.73449	0.30675	0.96614	0.19545	0.17867	0.22023	0.50082	0.83208	0.56037	0.42423	0.15319	0.40739	0.85454	0.70091	0.39335	0.35913	0.51071	0.45943	5.402e-06
Qkernel.CORE.4D	avgbs_39449.1.50	0.0199601	Mrg08	Chr2D	137	0.41614	0.02111	0.34602	0.57839	0.02128	0.79472	0.13875	0.01549	0.62067	0.04675	0.03559	0.78658	0.05798	0.66669	0.25461	0.00958	0.75231	0.03962	0.00214	0.00447	0.01766	0.01197	0.0159	0.28848	0.11647	0.11377	0.0093	0.01314	0.00321	0.70292	0.02715	0.01361	0.02393	0.03297	0.00851	0.07029	0.00464	0.25154	0.00536	0.43836	0.01004	0.00030169	0.11348	8.3904e-05
Qkernel.CORE.4D	avgbs2_114723.1.59	0.159681	Mrg08	Chr2D	153.1	0.62509	0.76951	0.41263	0.66071	0.62509	0.37178	0.83427	0.81476	0.48436	0.69532	0.07414	0.95492	0.86567	0.0351	0.5167	0.64976	0.69737	0.52457	0.73354	0.91892	0.94805	0.59425	0.98832	0.03517	0.41405	0.25603	0.75294	0.42516	0.14591	0.60462	0.99937	0.91812	0.73086	0.43193	0.80884	0.2688	0.41492	0.42226	0.48843	0.36469	0.72602	0.81339	0.04412	0.01312
Qkernel.CORE.4D	avgbs2_159624.1.24	0.011976	Mrg23	Chr3A	38	0.10134	0.44958	0.29116	0.27134	0.05757	0.24731	0.42241	2.6839e-13	0.28897	4.3935e-07	1.1666e-08	0.29599	1.2529e-13	0.45296	2.7694e-05	0.0644	0.67391	0.43285	0.01264	0.06692	0.05762	0.13004	0.19111	0.95317	0.43702	0.77559	0.62363	0.08795	0.38699	0.72271	0.08142	0.12078	0.08309	0.13507	0.15836	0.86976	0.29931	0.99308	0.56535	0.17968	0.17381	0.1867	9.0565e-14	0.33158
Qkernel.CORE.4D	avgbs2_15591.1.26	0.0139721	Mrg23	Chr3A	38.8	0.29173	0.40504	0.2826	0.85315	0.48137	0.99801	0.79418	9.1903e-09	0.0156	0.00016854	1.744e-05	0.25889	1.2202e-09	0.39609	0.00099887	0.05053	0.58326	0.97865	0.01001	0.04606	0.12341	0.02904	0.11799	0.72972	0.20835	0.86005	0.28963	0.05518	0.56038	0.15521	0.06362	0.13057	0.0919	0.06426	0.28195	0.11717	0.5519	0.58082	0.57161	0.036	0.1369	0.55124	7.899e-09	0.38299
Qkernel.CORE.4D	avgbs_11981.1.11	0.0179641	Mrg23	Chr3A	38.9	0.44524	0.54838	0.39937	0.98822	0.76183	0.8589	0.7594	1.1602e-07	0.06977	0.00041037	3.6643e-05	0.52051	1.9502e-08	0.62587	0.00079979	0.16805	0.86688	0.82976	0.05682	0.10836	0.31915	0.08474	0.24021	0.82564	0.20012	0.91181	0.45002	0.11163	0.80652	0.24573	0.17009	0.24056	0.25474	0.08254	0.54039	0.07663	0.65847	0.79908	0.48385	0.09868	0.34853	0.54859	4.752e-08	0.84118
Qkernel.CORE.4D	avgbs2_36272.1.54	0.0139721	Mrg23	Chr3A	39	0.33852	0.41802	0.30018	0.88941	0.44731	0.95073	0.78447	3.5664e-09	0.0111	0.00016175	7.7605e-06	0.19099	4.3146e-10	0.46315	0.00078156	0.10568	0.62929	0.66082	0.03551	0.06408	0.20835	0.06131	0.23429	0.93369	0.19661	0.82097	0.45173	0.08186	0.92379	0.17664	0.18316	0.16289	0.16604	0.08263	0.42285	0.06635	0.84274	0.5017	0.56533	0.03147	0.36361	0.73275	5.5589e-10	0.59193
Qkernel.CORE.4D	avgbs_cluster_569.1.58	0.00998004	Mrg23	Chr3A	39.1	0.09916	0.41317	0.28351	0.75729	0.88301	0.65517	0.93701	4.9278e-07	0.01314	0.58211	0.74277	0.27539	1.0735e-07	0.49906	0.94739	0.06279	0.29616	0.78575	0.01085	0.05449	0.18202	0.04045	0.16251	0.96958	0.23519	0.80443	0.11327	0.06173	0.77842	0.09377	0.07284	0.10142	0.13592	0.0876	0.56525	0.48277	0.40985	0.5155	0.68676	0.21112	0.14817	0.61655	4.9142e-08	0.8398
Qkernel.CORE.4D	avgbs2_38542.1.40	0.0139721	Mrg23	Chr3A	39.6	0.2553	0.4435	0.20213	0.94468	0.83699	0.67629	0.9284	1.6886e-07	0.0193	0.00025145	0.00010619	0.27127	8.1735e-08	0.7492	0.00185	0.12611	0.70461	0.95945	0.02807	0.05607	0.25919	0.21212	0.19052	0.68725	0.10901	0.85496	0.30995	0.031	0.67325	0.13819	0.11547	0.12915	0.1945	0.29335	0.32205	0.14357	0.73853	0.79063	0.36269	0.0947	0.20212	0.37309	7.0963e-08	0.45693
Qkernel.CORE.4D	avgbs2_146561.1.25	0.0139721	Mrg23	Chr3A	40.1	0.35104	0.38672	0.6313	0.85003	0.3111	0.22641	0.85302	5.6467e-13	0.10057	1.0929e-06	9.8016e-09	0.10383	2.4961e-13	0.17684	3.6484e-05	0.0476	0.6201	0.50038	0.00761	0.05799	0.0536	0.09177	0.14733	0.50791	0.48711	0.76651	0.34233	0.07751	0.50111	0.53242	0.04449	0.06632	0.06581	0.12038	0.38045	0.86067	0.97478	0.90722	0.26251	0.32116	0.14412	0.37695	1.9385e-13	0.30551
Qkernel.CORE.4D	avgbs_31026.1.60	0.011976	Mrg23	Chr3A	40.3	0.32985	0.23461	0.32195	0.87118	0.28919	0.08485	0.72108	3.5898e-13	0.25716	4.7681e-07	6.8591e-09	0.48376	1.3198e-13	0.19221	3.4713e-05	0.02295	0.52873	0.29646	0.00682	0.03916	0.02867	0.04028	0.09524	0.96049	0.58545	0.52635	0.39547	0.02506	0.59043	0.42977	0.06153	0.06081	0.04905	0.01729	0.00726	0.30617	0.13377	0.38423	0.10844	0.0047	0.03353	0.03387	9.8008e-14	0.35176
Qkernel.CORE.4D	avgbs_cluster_20071.1.9	0.011976	Mrg23	Chr3A	40.6	0.48582	0.89786	0.63784	0.45678	0.24259	0.29921	0.26196	9.1832e-13	0.24749	9.8079e-07	3.9874e-08	0.35462	3.1996e-13	0.29079	8.6627e-05	0.01623	0.69143	0.29373	0.00275	0.0358	0.01174	0.02727	0.11004	0.9233	0.52431	0.68139	0.59342	0.05703	0.46314	0.5821	0.04087	0.12244	0.04734	0.04565	0.23334	0.8657	0.6414	0.92517	0.55376	0.31562	0.10287	0.26061	1.2265e-13	0.29115
Qkernel.CORE.4D	avgbs_cluster_13500.1.26	0.0139721	Mrg23	Chr3A	40.6	0.50212	0.22733	0.67165	0.89352	0.50403	0.2666	0.83682	1.7223e-13	0.11281	1.5382e-07	1.7754e-08	0.45002	7.2478e-14	0.10679	5.3625e-05	0.05774	0.71377	0.56082	0.00916	0.07916	0.05872	0.11225	0.16023	0.97597	0.50443	0.92574	0.38213	0.05179	0.3331	0.30342	0.05203	0.14201	0.07869	0.12963	0.27336	0.01771	0.99779	0.99035	0.50395	0.02131	0.19391	0.44464	1.5095e-14	0.006
Qkernel.CORE.4D	avgbs_cluster_28649.1.32	0.0139721	Mrg23	Chr3A	44.2	0.47409	0.52033	0.3327	0.79655	0.44686	0.4631	0.82846	5.3192e-13	0.29787	4.8507e-07	3.7626e-08	0.83985	1.2065e-13	0.59222	2.3196e-05	0.0637	0.40913	0.54918	0.00792	0.05917	0.04975	0.16565	0.1723	0.43253	0.30658	0.52956	0.47507	0.09728	0.46639	0.84197	0.05102	0.15502	0.08221	0.16527	0.45158	0.48774	0.70799	0.98514	0.6264	0.25442	0.20754	0.4623	2.4321e-13	0.23845
Qkernel.CORE.4D	avgbs_cluster_23890.1.54	0.011976	Mrg23	Chr3A	53.7	0.03966	0.55191	0.33273	0.29377	0.43638	0.63863	0.88959	3.4482e-07	0.14865	0.75378	0.91071	0.70748	6.3896e-07	0.80554	0.78704	0.03078	0.3052	0.551	0.01184	0.0161	0.04494	0.03886	0.05214	0.98482	0.17833	0.8405	0.11157	0.02027	0.26519	0.19077	0.02653	0.02764	0.04576	0.03104	0.26453	0.67781	0.98313	0.51706	0.33436	0.51546	0.16219	0.18729	8.3323e-07	0.35895
Qkernel.CORE.4D	avgbs_28484.1.50	0.0139721	Mrg23	Chr3A	53.7	0.20362	0.4934	0.3161	0.32349	0.88546	0.78863	0.62216	1.9497e-07	0.01347	0.00035194	0.0046	0.32196	2.6572e-07	0.95951	0.01087	0.20017	0.62341	0.25722	0.07124	0.14017	0.0926	0.15764	0.29161	0.88534	0.26016	0.6466	0.54784	0.07532	0.20293	0.5879	0.05133	0.16592	0.10091	0.06623	0.45169	0.59492	0.93011	0.47117	0.23835	0.39958	0.31342	0.3625	1.1213e-07	0.30518
Qkernel.CORE.4D	avgbs_cluster_25230.1.24	0.0139721	Mrg23	Chr3A	53.7	0.59255	0.88552	0.71807	0.49676	0.58823	0.22764	0.38723	4.8903e-13	0.12319	6.4098e-08	1.4996e-08	0.68373	1.8206e-13	0.71041	4.4018e-05	0.02545	0.58395	0.71186	0.00364	0.03073	0.04707	0.02362	0.07947	0.99783	0.5048	0.75964	0.4492	0.02487	0.43098	0.4328	0.02335	0.07302	0.05334	0.03342	0.429	0.95446	0.64708	0.96187	0.45172	0.61235	0.16577	0.16866	2.496e-13	0.29031
Qkernel.CORE.4D	avgbs2_134807.1.37	0.14	Mrg23	Chr3A	53.7	0.37065	0.55519	0.67341	0.22362	0.40257	0.22575	0.76404	0.00010633	0.00561	0.8612	0.7605	0.16352	0.00038397	0.33026	0.25112	0.15975	0.31344	0.53166	0.16728	0.02443	0.5019	0.1021	0.12898	0.61379	0.21891	0.43843	0.08367	0.08001	0.26708	0.12551	0.37114	0.07261	0.39635	0.24382	0.50698	0.37628	0.3107	0.46464	0.54619	0.3207	0.89854	0.5546	1.2287e-06	0.75417
Qkernel.CORE.4D	avgbs2_16655.1.12	0.0758483	Mrg23	Chr3A	53.8	0.27162	0.3826	0.66509	0.856	0.18986	0.64445	0.33344	0.04443	0.23487	8.302e-07	4.2585e-09	0.53778	0.06969	0.30949	3.2227e-05	0.0767	0.23441	0.24028	0.24027	0.08849	0.02191	0.05221	0.17203	0.59314	0.92052	0.12774	0.13273	0.58446	0.15607	0.81445	0.4879	0.22864	0.06248	0.10984	0.52694	0.18844	0.90505	0.91046	0.30479	0.02744	0.67307	0.80123	0.35775	0.59546
Qkernel.CORE.4D	avgbs_222301	0.00598802	Mrg23	Chr3A	89.9	0.36219	0.39571	0.77802	0.46693	0.66373	0.27504	0.47813	0.43085	0.02582	0.54472	0.79761	0.02285	0.64962	0.20897	0.28799	0.3813	0.83864	0.77327	0.03714	0.54882	0.96182	0.79046	0.60046	0.45935	0.69215	0.8683	0.87672	0.5101	0.40254	0.06329	0.09065	0.3928	0.62502	0.92262	0.84253	0.79641	0.80897	0.11159	0.52165	0.62004	0.53086	0.77432	0.49309	6.0662e-06
Qkernel.CORE.4D	avgbs_cluster_6297.1.36	0.123752	Mrg15	Chr3C	30.5	0.68522	0.56858	0.72495	0.25211	0.78642	0.8115	0.87666	0.00013477	0.54072	0.43137	3.1741e-09	0.4398	0.00163	0.73084	3.2324e-06	1.1718e-05	0.7826	1.1001e-06	9.6604e-05	0.00068838	0.74762	0.00649	3.0695e-06	0.41285	0.04522	7.0404e-06	0.00066989	7.3337e-05	0.00088321	0.0982	0.00031542	0.00011088	0.84936	0.02097	0.00116	0.83001	0.00044042	0.04558	0.09226	0.33943	0.00288	0.01752	0.04923	0.33925
Qkernel.CORE.4D	avgbs_61378.1.10	0.221557	Mrg15	Chr3C	32.7	0.15364	0.60858	0.28782	0.18483	0.3218	0.69927	0.83211	0.14538	0.89863	0.11482	0.28257	0.63309	0.13889	0.63346	0.33641	0.91961	0.62823	0.93148	0.89765	0.8278	0.59449	0.57474	0.85234	0.38416	0.87076	0.79772	0.61062	0.73443	0.7558	0.81534	0.52304	0.8387	0.43837	0.23395	0.88306	0.69846	0.62131	0.53177	0.95119	0.28881	0.8952	0.9526	0.00271	0.00359
Qkernel.CORE.4D	avgbs2_172594.1.44	0.183633	Mrg15	Chr3C	85.8	0.9163	0.70339	0.4121	0.32342	0.77998	0.81065	0.64434	5.4587e-07	0.29848	0.23918	0.34966	0.23911	3.8123e-07	0.62507	0.55314	0.0796	0.85173	0.89722	0.01153	0.18936	0.0143	0.22841	0.10803	0.22982	0.38115	0.3836	0.205	0.19592	0.31789	0.95655	0.04886	0.11565	0.0126	0.30616	0.53385	0.16571	0.23347	0.59017	0.42924	0.97784	0.07684	0.45302	1.3706e-09	0.24847
Qkernel.CORE.4D	avgbs2_34847.1.28	0.0638723	Mrg19	Chr3D	14.2	0.89549	0.20053	0.98129	0.63259	0.87826	0.69973	0.84617	2.2922e-10	0.51035	0.204	0.01594	0.58887	7.6417e-10	0.12829	0.00372	0.03514	0.5771	0.00554	0.1413	0.37526	0.00125	0.02002	0.03695	0.77233	0.13768	0.00473	0.07788	0.16436	0.02137	0.03301	0.13438	0.17272	0.01426	0.01934	0.00603	0.00677	0.00011682	0.05966	0.16747	0.04183	0.00729	0.01186	1.4725e-05	0.80346
Qkernel.CORE.4D	avgbs2_48247.1.24	0.0439122	Mrg19	Chr3D	45.4	0.01524	0.91857	0.31911	0.0221	0.02415	0.69305	0.33196	5.0489e-10	3.6551e-05	0.02668	0.30721	0.17385	8.7286e-10	0.36876	0.68117	0.03407	0.56139	0.04518	0.07749	0.26005	0.00035672	0.02102	0.04375	0.69928	0.89937	0.06504	0.03747	0.05003	0.02308	0.12589	0.12078	0.10001	0.00715	0.01117	0.00203	0.01096	0.00048053	0.02323	0.11105	0.61098	0.00275	0.00592	1.2124e-07	0.87595
Qkernel.CORE.4D	avgbs_204560.1.40	0.11976	Mrg19	Chr3D	64.2	0.89555	0.78776	0.24	0.76913	0.68966	0.58003	0.71661	4.2082e-07	0.81296	0.33377	0.26045	0.58912	2.1971e-06	0.10934	0.00647	4.6611e-06	0.49278	6.6621e-06	2.0889e-05	0.00074817	1.0319e-07	4.8056e-05	0.00053164	0.10319	0.68411	0.0006533	0.00523	0.00544	0.00113	0.12644	0.00105	0.00173	1.0416e-05	0.00056203	0.00183	0.60693	0.02224	0.13765	0.10099	0.42981	0.00182	8.0719e-05	0.01968	0.98605
Qkernel.CORE.4D	avgbs2_84520.1.21	0.46	Mrg19	Chr3D	76.3	0.32996	0.47332	0.594	0.85171	0.27094	0.09093	0.69096	0.82033	0.84773	0.40032	0.97759	0.36794	0.82471	0.42279	0.62972	0.5073	0.46531	0.43933	0.71598	0.58107	0.97128	0.04954	0.30635	0.97558	0.01929	0.32165	0.40499	0.49765	0.17167	0.20202	0.51625	0.54707	0.80308	0.04692	0.76216	0.68253	0.5277	0.85158	0.70841	0.67747	0.8116	0.5676	0.03734	0.00050568
Qkernel.CORE.4D	avgbs2_88385.1.55	0.0598802	Mrg20	Chr4A	18	0.52297	0.29612	0.92508	0.37452	0.27835	0.29403	0.78529	6.1189e-08	0.80322	0.03073	0.34736	0.87074	1.1796e-07	0.26625	0.70218	0.07965	0.57868	0.17305	0.06067	0.21121	0.00742	0.15492	0.64437	0.20593	0.23205	0.68465	0.94103	0.85754	0.94262	0.41443	0.26512	0.56445	0.08822	0.68099	0.94555	0.53884	0.51254	0.41156	0.88039	0.68484	0.93085	0.75333	0.00112	0.43284
Qkernel.CORE.4D	avgbs_7363.1.45	0.361277	Mrg20	Chr4A	18.7	0.56782	0.57592	0.27255	0.44482	0.83715	0.61947	0.61712	0.44791	0.04762	0.92124	0.75998	0.33348	0.61102	0.44123	0.92635	0.30431	0.68571	0.49718	0.24525	0.72511	0.89384	0.308	0.72314	0.00697	0.4744	0.40778	0.18714	0.25766	0.44458	0.90758	0.31972	0.95907	0.9466	0.40905	0.64306	0.37666	0.47855	0.22006	0.85676	0.77216	0.25443	0.55583	0.04546	0.00281
Qkernel.CORE.4D	avgbs2_48222.1.8	0.0179641	Mrg20	Chr4A	19.1	0.76348	0.04536	0.32285	0.99876	0.66973	0.95701	0.50334	1.5695e-05	0.30351	0.53714	0.09617	0.75446	4.7333e-05	0.99238	0.24156	0.06185	0.01403	0.22935	0.07665	0.18388	0.23561	0.13124	0.5931	0.01255	0.25076	0.12085	0.24093	0.54137	0.53866	0.10524	0.24491	0.2009	0.24349	0.4823	0.74563	0.92503	0.29673	0.52508	0.96034	0.23145	0.58878	0.34014	6.5588e-06	0.23806
Qkernel.CORE.4D	avgbs2_122326.1.23	0.111776	Mrg20	Chr4A	122.8	0.20955	0.09752	0.27006	0.18853	0.30187	0.07834	0.22077	5.7046e-07	0.93913	0.73699	0.14556	0.19717	4.637e-06	0.68216	0.52165	0.05493	0.59881	0.06685	0.16652	0.23307	0.00029265	0.02616	0.11703	0.21941	0.51943	0.10564	0.0922	0.5336	0.0188	0.03207	0.36257	0.19111	0.00551	0.01185	0.04965	0.26769	0.00756	0.05963	0.40579	0.5846	0.22371	0.04075	0.00028936	0.90926
Qkernel.CORE.4D	avgbs2_63486.2.11	0.205589	Mrg20	Chr4A	147.3	0.24377	0.8653	0.08117	0.2895	0.47633	0.43012	0.84976	5.3398e-10	0.88051	0.02436	0.2009	0.38168	3.5654e-09	0.45833	0.29623	0.03287	0.30124	0.05102	0.07964	0.22318	0.00050893	0.01896	0.05351	0.25233	0.51914	0.0613	0.04286	0.38608	0.01282	0.89611	0.09083	0.14028	0.00781	0.01604	0.00358	0.01578	0.00041081	0.03438	0.13475	0.46166	0.00272	0.00532	3.3218e-06	0.88004
Qkernel.CORE.4D	avgbs2_87524.1.25	0.011976	Mrg20	Chr4A	176.1	0.69824	0.73188	0.3019	0.98438	0.97541	0.43614	0.39841	0.00044292	0.33794	0.84748	0.05127	0.05774	0.00028826	0.64412	0.70395	0.41664	0.59316	0.64648	0.23403	0.56898	0.00061297	0.29918	0.1919	0.86601	0.44349	0.50052	0.30388	0.5845	0.00971	0.91337	0.16848	0.22336	0.00451	0.28239	0.0914	0.66822	0.07705	0.50174	0.06185	0.52187	0.07216	0.06692	0.00801	0.04909
Qkernel.CORE.4D	avgbs_206354.1.37	0.0139721	Mrg20	Chr4A	184.1	0.80145	0.51366	0.2347	0.98205	0.74881	0.45739	0.46029	0.00067082	0.33642	0.64347	0.19723	0.13426	0.00089556	0.58733	0.68769	0.33441	0.5797	0.39844	0.22144	0.56131	0.0008402	0.326	0.24178	0.91552	0.20722	0.38131	0.10734	0.72596	0.01341	0.87629	0.30789	0.22031	0.00701	0.39379	0.16287	0.20447	0.03803	0.83975	0.14159	0.28207	0.16791	0.08978	0.01184	0.20047
Qkernel.CORE.4D	avgbs_77509.1.57	0.0159681	Mrg20	Chr4A	193.6	0.23365	0.01393	0.05027	0.83953	0.05642	0.93381	0.17258	1.7444e-05	0.07386	0.58637	0.61154	0.27828	2.2016e-05	0.72149	0.39566	0.35403	0.93122	0.69719	0.09559	0.49648	1.9136e-05	0.37282	0.34285	0.19241	0.52198	0.63908	0.42776	0.82165	0.02508	0.98117	0.04934	0.21816	0.00035928	0.3133	0.07459	0.83442	0.04317	0.24106	0.10774	0.50235	0.02451	0.06783	0.00296	0.25804
Qkernel.CORE.4D	avgbs_119897.1.26	0.283433	Mrg20	Chr4A	239.2	0.98666	0.33896	0.49757	0.94532	0.46745	0.77487	0.47911	3.8488e-07	0.96243	0.05938	0.3785	0.30517	1.4523e-06	0.80071	0.07354	0.00357	0.26463	0.00144	0.0456	0.00995	0.00213	0.00713	0.01638	0.30794	0.82184	0.00789	0.04593	0.06767	0.03443	0.75031	0.0624	0.01553	0.00742	0.004	0.00189	0.84207	0.00561	0.18369	0.03841	0.13724	0.02318	0.00033484	0.00766	0.77299
Qkernel.CORE.4D	avgbs2_83942.1.18	0.141717	Mrg20	Chr4A	246.7	0.35046	0.49812	0.35603	0.52071	0.46049	0.26673	0.82162	3.1741e-09	0.5886	0.48532	0.9846	0.75485	4.6227e-10	0.60951	0.84827	0.01316	0.67605	0.95011	0.0004113	0.06179	0.05979	0.04031	0.00502	0.45595	0.09554	0.46444	0.01924	0.01068	0.25893	0.42935	0.0001047	0.05802	0.12735	0.05143	0.0217	0.55994	0.20077	0.09862	0.21168	0.58267	0.00145	0.03355	5.6476e-09	0.43594
Qkernel.CORE.4D	avgbs2_153634.1.23	0.175649	Mrg20	Chr4A	249.4	0.81261	0.07989	0.41546	0.20517	0.84358	0.21518	0.56659	4.9791e-09	0.72108	0.67451	0.53577	0.18516	1.3621e-08	0.03598	0.35848	0.00453	0.40284	0.00523	0.01616	0.06897	0.00087426	0.00282	0.00564	0.18578	0.80504	0.0141	0.00125	0.1776	0.00537	0.40997	0.00545	0.03348	0.01119	0.00296	0.00288	0.01122	8.3116e-05	0.04279	0.14744	0.52372	0.00127	0.00252	6.9221e-05	0.8123
Qkernel.CORE.4D	avgbs2_137716.1.24	0.303393	Mrg20	Chr4A	249.7	0.59021	0.61233	0.22051	0.68276	0.61313	0.05027	0.79262	2.7283e-07	0.46176	0.56134	0.5769	0.68349	4.6792e-07	0.05366	0.06902	0.13162	0.44761	0.69674	0.12227	0.5687	0.69647	0.17491	0.17278	0.57753	0.36613	0.95102	0.66003	0.68604	0.04678	0.2713	0.11269	0.57927	0.58652	0.3279	0.15725	0.3474	0.35878	0.34068	0.45179	0.02178	0.12111	0.53192	0.02812	0.92917
Qkernel.CORE.4D	avgbs2_71214.1.32	0.0419162	Mrg11	Chr4C	21.9	0.94025	0.99581	0.4035	0.90038	0.93253	0.61536	0.32766	9.6776e-10	0.18261	0.19035	0.36662	0.53933	4.4839e-09	0.48664	0.87301	0.02196	0.563	0.04696	0.05281	0.2242	0.00053855	0.01508	0.05528	0.74138	0.62843	0.06167	0.05495	0.81787	0.02183	0.5146	0.09083	0.16155	0.00846	0.01305	0.0018	0.00802	0.0003125	0.04116	0.11335	0.18168	0.00169	0.00299	1.9831e-06	0.13885
Qkernel.CORE.4D	avgbs_107371.1.20	0.0618762	Mrg11	Chr4C	86.9	0.09088	0.39883	0.08326	0.4578	0.03036	0.22757	0.49121	7.137e-10	0.21412	0.88862	0.0579	0.89031	5.1991e-09	0.48633	0.14032	0.03982	0.26254	0.06644	0.06311	0.32883	0.0008163	0.02007	0.06655	0.7312	0.94871	0.06331	0.0508	0.97837	0.03001	0.83511	0.03101	0.15019	0.00698	0.01571	0.00428	0.00914	0.00060855	0.0428	0.16694	0.05154	0.00334	0.00738	7.8575e-06	0.8589
Qkernel.CORE.4D	avgbs2_185147.1.16	0.173653	Mrg21	Chr4D	3.2	0.2234	0.7958	0.47379	0.19308	0.70735	0.08026	0.6016	0.60151	0.72788	0.71797	0.41008	0.44503	0.5519	0.19496	0.44367	0.94057	0.70955	0.74378	0.84041	0.7531	0.60354	0.99302	0.81696	0.20806	0.27718	0.18997	0.36333	0.62055	0.74417	0.40867	0.58399	0.44548	0.86887	0.915	0.4904	0.28757	0.58359	0.53435	0.63075	0.92442	0.37437	0.59286	0.51619	0.73469
Qkernel.CORE.4D	avgbs2_17279.1.41	0.04	Mrg21	Chr4D	27.3	0.9013	0.99247	0.63787	0.50086	0.72061	0.88076	0.79249	0.72631	0.80118	0.95057	0.99471	0.0263	0.91749	0.16027	0.57765	0.82888	0.9114	0.9418	0.95126	0.89076	0.88945	0.31197	0.82167	0.59925	0.88765	0.9086	0.76399	0.68252	0.61525	0.9137	0.72739	0.69845	0.82813	0.37303	0.18747	0.96147	0.40302	0.27611	0.11411	0.77345	0.40051	0.17555	0.4838	2.7265e-06
Qkernel.CORE.4D	avgbs2_17279.2.21	0.0379242	Mrg21	Chr4D	28.3	0.69474	0.69111	0.96519	0.10104	0.19482	0.88056	0.1563	0.05803	0.55847	0.77416	0.07834	0.16214	0.02618	0.63077	0.19059	0.4376	0.8648	0.85429	0.17191	0.55	0.78575	0.46508	0.18296	0.03785	0.59325	0.41624	0.11024	0.04721	0.88302	0.70321	0.05463	0.45408	0.81693	0.44368	0.15219	0.34652	0.24944	0.27309	0.25679	0.7218	0.38432	0.09609	0.00304	1.3124e-05
Qkernel.CORE.4D	avgbs_245003.1.32	0.0279441	Mrg21	Chr4D	122.8	0.09259	0.95482	0.46743	0.11252	0.13471	0.65736	0.43029	0.02618	0.67238	0.01714	0.36524	0.30671	0.0636	0.51637	0.18761	0.43622	0.80243	0.68862	0.77609	0.4522	0.8489	0.95609	0.38385	0.50575	0.6561	0.6299	0.43252	0.37629	0.9147	0.82647	0.93079	0.32248	0.77143	0.91805	0.99051	0.5931	0.90334	0.68485	0.16671	0.57527	0.52857	0.9596	0.00051611	0.00204
Qkernel.CORE.4D	avgbs2_11322.2.29	0.00998004	Mrg21	Chr4D	125.8	0.4817	0.02891	0.58306	0.58294	0.21511	0.99375	0.00013008	1.9744e-19	0.42069	0.47667	0.18957	0.26375	7.9897e-19	0.25846	0.54216	0.00226	0.86908	0.08998	0.00063812	0.02583	5.1072e-06	0.00155	0.00231	0.29995	0.38235	0.09681	0.00154	0.00814	0.00174	0.02141	0.00088769	0.01837	0.00010284	0.00737	0.0001889	0.11374	0.0224	0.00884	0.07869	0.1824	4.227e-05	0.00061728	2.4559e-08	0.13539
Qkernel.CORE.4D	avgbs2_17913.1.57	0.00998004	Mrg21	Chr4D	125.8	0.20525	0.02427	0.50875	0.40399	0.2996	0.91775	0.0002306	2.8796e-19	0.39628	0.93877	0.33663	0.20136	5.8394e-18	0.31665	0.80966	0.00213	0.63217	0.04596	0.00077452	0.02722	7.7118e-07	0.00057463	0.0009842	0.17418	0.2673	0.06892	0.00038196	0.01452	0.00139	0.01772	0.00087856	0.01335	2.7216e-05	0.00391	0.0001561	0.15148	0.02416	0.00387	0.10331	0.20135	2.8609e-05	0.00040087	2.9205e-07	0.2553
Qkernel.CORE.4D	avgbs2_11322.2.42	0.0279441	Mrg21	Chr4D	125.8	0.48288	0.01256	0.23841	0.3535	0.05864	0.2777	0.00763	1.8449e-10	0.50142	0.02809	0.01874	0.05536	1.4074e-09	0.45362	0.06267	0.06163	0.89648	0.24309	0.07876	0.17222	0.00026719	0.04555	0.01126	0.53279	0.12595	0.12571	0.00772	0.01105	0.03588	0.08586	0.032	0.17864	0.00067837	0.04294	0.08224	0.07753	0.1846	0.08962	0.98128	0.33439	0.014	0.02753	0.00522	0.62707
Qkernel.CORE.4D	avgbs_1657.1.47	0.00998004	Mrg21	Chr4D	140.1	0.49426	0.03282	0.61543	0.48596	0.14536	0.99908	0.00016728	1.7369e-19	0.39223	0.50362	0.0844	0.19693	1.2933e-18	0.25576	0.48252	0.00115	0.74943	0.06355	0.00037018	0.01566	5.1443e-06	0.00042395	0.00097988	0.25904	0.37433	0.08011	0.00055355	0.00416	0.00134	0.02251	0.00043278	0.01034	8.1528e-05	0.00376	0.00017531	0.0943	0.01875	0.00699	0.07688	0.203	3.1422e-05	0.00045074	1.4777e-08	0.16315
Qkernel.CORE.4D	avgbs_14023.1.49	0.011976	Mrg21	Chr4D	140.1	0.7947	0.10205	0.85348	0.70862	0.36683	0.83777	0.00019779	7.2137e-19	0.42545	0.74976	0.16563	0.11893	3.0338e-18	0.45142	0.65266	0.001	0.78459	0.10566	0.00060863	0.01836	6.3965e-06	0.00064889	0.0016	0.37808	0.66247	0.15246	0.00143	0.01286	0.00592	0.04858	0.00016463	0.02429	0.00023619	0.00797	5.2151e-05	0.20872	0.02439	0.00559	0.02873	0.45661	5.9769e-05	4.7111e-05	1.8624e-08	0.38128
Qkernel.CORE.4D	avgbs_231070.1.18	0.0139721	Mrg21	Chr4D	140.1	0.54851	0.08329	0.33988	0.43904	0.34408	0.98772	0.0005841	2.51e-19	0.71265	0.61571	0.21075	0.42837	1.2636e-18	0.23635	0.33354	0.00389	0.47988	0.03496	0.00268	0.0053	2.7556e-05	0.00367	0.00605	0.29499	0.25562	0.20355	0.00262	0.01291	0.00958	0.00355	0.00221	0.02272	0.00071305	0.0223	0.00071112	0.1241	0.05811	0.01395	0.18809	0.4233	0.0001426	0.00103	5.4702e-08	0.35747
Qkernel.CORE.4D	avgbs2_154609.1.15	0.0159681	Mrg21	Chr4D	140.1	0.23027	0.51772	0.54489	0.23306	0.0902	0.46066	0.47213	4.0356e-13	0.56688	0.05866	0.24928	0.20219	1.9912e-11	0.06463	0.74126	0.00612	0.00149	0.16182	0.0143	0.03389	0.00075856	0.00010449	0.00418	0.82074	0.58252	0.13798	0.01284	0.06284	0.00251	0.35014	0.00729	0.02516	0.0034	0.0001128	0.00027567	0.01565	0.01774	0.00045938	0.52599	0.30188	7.8179e-05	0.00483	1.2994e-05	0.63428
Qkernel.CORE.4D	avgbs2_178254.1.22	0.0219561	Mrg21	Chr4D	140.1	0.77378	0.04003	0.32543	0.81822	0.42805	0.69888	0.00074673	1.3129e-18	0.36887	0.76333	0.28504	0.43415	8.1684e-18	0.52281	0.43961	0.00503	0.87474	0.19645	0.0005191	0.06306	3.7953e-05	0.00276	0.006	0.43484	0.60836	0.20092	0.0045	0.01717	0.00754	0.03704	0.00088725	0.05436	0.00066843	0.02082	0.00070379	0.25605	0.08117	0.02133	0.17887	0.35399	0.00012724	0.00222	8.9755e-08	0.35973
Qkernel.CORE.4D	avgbs_73019.1.24	0.0139721	Mrg21	Chr4D	142	0.1171	0.067	0.56808	0.20109	0.52512	0.96221	0.00103	7.2824e-17	0.60498	0.66875	0.66407	0.4433	1.7387e-15	0.47355	0.92108	0.01534	0.72285	0.14857	0.00524	0.10822	1.7645e-05	0.00477	0.00661	0.38033	0.41281	0.20809	0.00148	0.0427	0.00538	0.02787	0.00397	0.04924	0.00019644	0.02142	0.00116	0.29966	0.10266	0.01711	0.02879	0.39665	0.00017625	0.00265	1.8658e-06	0.42181
Qkernel.CORE.4D	avgbs2_57118.1.44	0.0159681	Mrg21	Chr4D	142	0.52615	0.03258	0.61609	0.58318	0.32566	0.53125	0.00135	5.2494e-22	0.645	0.97192	0.35161	0.49822	3.7695e-21	0.05654	0.51221	0.0008926	0.77765	0.05645	0.00036863	0.03541	6.2788e-06	0.00020088	0.00051428	0.54552	0.43395	0.06791	0.00055189	0.00317	0.00126	0.04214	0.00086604	0.01349	0.00022974	0.0028	5.7024e-05	0.32548	0.01851	0.0078	0.12465	0.20184	1.757e-05	0.00034006	2.0232e-10	0.3998
Qkernel.CORE.4D	avgbs_107220.1.32	0.00998004	Mrg21	Chr4D	187.6	0.62068	0.24129	0.30629	0.75357	0.10038	NaN	0.34898	2.6081e-17	0.49871	0.60362	0.00676	0.00058972	1.7086e-16	NaN	0.1567	0.00201	0.94248	0.00119	0.00042339	0.00352	5.0846e-05	0.00297	0.00153	0.39625	0.39642	0.00041333	0.02624	0.00638	0.00063834	0.14276	0.00066162	0.0003571	0.00039424	0.00179	0.00052831	0.08402	0.00165	0.05926	0.01128	0.57935	0.00022289	6.5966e-05	2.4991e-10	0.02868
Qkernel.CORE.4D	avgbs_13055.1.9	0.0139721	Mrg21	Chr4D	187.6	0.90445	0.94964	0.79036	0.93193	0.15786	0.33151	0.55766	8.1151e-16	0.8885	0.92181	0.65519	0.87156	2.7257e-14	0.71282	0.7	2.6196e-05	0.68168	0.00841	1.0627e-05	0.00089122	9.4536e-06	1.5465e-05	0.00020884	0.55251	0.46141	0.00667	0.00835	0.02004	0.00364	0.44219	0.00062413	0.00037755	0.00031988	2.9133e-05	0.00088392	0.09196	0.02926	0.05021	0.13828	0.75773	0.0002377	0.00068714	1.1951e-05	0.39608
Qkernel.CORE.4D	avgbs_cluster_11478.1.25	0.0159681	Mrg21	Chr4D	187.6	0.55584	0.86225	0.83927	0.70372	0.19432	0.31961	0.91212	1.1364e-20	0.95092	0.98049	0.03396	0.0089	6.2388e-20	0.19975	0.07496	0.00070008	0.9469	0.00035903	0.0001293	0.00987	7.9666e-07	0.00109	0.00036116	0.61337	0.8341	0.00018176	0.05203	0.00087387	0.00015881	0.11112	0.00024145	0.0003705	1.8042e-05	0.00023837	8.2014e-05	0.22975	0.00237	0.01228	0.00827	0.12283	0.00011521	2.1908e-05	6.4461e-09	0.09281
Qkernel.CORE.4D	avgbs_cluster_20257.1.57	0.0219561	Mrg21	Chr4D	193.1	0.90906	0.63474	0.27369	0.80299	0.76788	0.62629	0.12371	4.1662e-12	0.54897	0.51275	0.90439	0.93042	1.273e-12	0.68139	0.76102	0.00014073	0.77472	0.00042718	8.2976e-06	0.00049657	6.331e-06	0.00023526	0.00011365	0.41149	0.02268	0.00084992	0.01211	0.0001423	0.00016642	0.00457	2.3839e-05	0.00051744	3.4948e-05	0.00067964	0.00010049	0.20018	0.00035443	0.00169	0.0037	0.3638	0.00010607	0.00031928	5.1169e-06	0.14122
Qkernel.CORE.4D	avgbs_125203.1.24	0.011976	Mrg21	Chr4D	195.7	0.2624	0.96031	0.34656	0.88497	0.10406	NaN	0.76133	2.0511e-29	0.42939	0.91025	7.5355e-11	0.00057627	8.1042e-27	NaN	2.3049e-06	1.4168e-11	0.89329	4.9091e-10	1.2364e-11	2.3484e-07	3.4193e-12	1.5607e-08	1.9881e-10	0.60266	0.80853	1.5476e-09	1.2186e-07	2.2804e-07	4.728e-09	0.2288	1.1749e-09	6.9466e-10	3.9966e-09	3.8687e-08	1.0513e-08	0.03471	2.8679e-08	0.00584	0.0005797	0.10841	1.6395e-09	3.3976e-09	4.2828e-13	0.07753
Qkernel.CORE.4D	avgbs_cluster_35476.1.63	0.011976	Mrg21	Chr4D	195.7	0.4995	0.29217	0.37607	0.89563	0.08287	NaN	0.38074	4.2783e-25	0.5944	0.81279	0.01025	0.00119	4.1952e-24	NaN	0.1269	4.7754e-05	0.59921	3.3148e-05	1.1351e-05	0.00072546	2.4812e-08	0.00026769	8.4385e-05	0.8203	0.90659	1.9232e-05	0.00161	0.0003443	4.8535e-05	0.20952	2.1159e-05	3.605e-05	1.6335e-06	0.00013393	8.3582e-06	0.06739	3.9086e-05	0.01752	0.00339	0.33266	2.3104e-06	2.4116e-07	6.4405e-13	0.01836
Qkernel.CORE.4D	avgbs_cluster_25152.1.16	0.0159681	Mrg21	Chr4D	195.7	0.37768	0.98324	0.38649	0.42094	0.15003	NaN	0.9031	2.1007e-24	0.65127	0.19936	1.1521e-07	0.02993	1.1555e-22	NaN	0.00081825	1.9573e-06	0.82457	1.0369e-06	3.1074e-07	4.5751e-05	1.0801e-08	5.8786e-05	3.1421e-06	0.61873	0.92579	5.7857e-07	0.00033474	3.235e-05	4.7937e-06	0.28673	9.835e-07	7.1412e-07	1.1718e-06	2.7566e-05	7.719e-07	0.11876	1.5381e-06	0.00739	0.0055	0.09592	1.684e-07	1.0628e-07	3.1841e-11	0.02796
Qkernel.CORE.4D	avgbs_cluster_35836.1.45	0.0159681	Mrg21	Chr4D	195.7	0.83415	0.40282	0.48035	0.46814	0.11834	0.46996	0.40635	5.6537e-30	0.86264	0.79507	0.0115	0.00255	7.8913e-28	0.49259	0.32709	3.5135e-05	0.87388	0.00090238	6.9749e-06	0.00029693	1.055e-09	0.00019052	4.0429e-05	0.98787	0.88111	0.00023021	0.00304	0.00239	3.3626e-05	0.55468	1.0781e-05	2.6372e-05	5.9598e-07	0.00025289	3.3481e-05	0.11696	0.00016878	0.03238	0.0038	0.85434	3.8504e-06	2.5154e-06	5.989e-14	0.02187
Qkernel.CORE.4D	avgbs2_73169.1.20	0.0159681	Mrg21	Chr4D	195.7	0.32412	0.85702	0.34443	0.84847	0.09417	NaN	0.64358	9.0261e-35	0.44837	0.74799	1.5545e-10	0.00084486	6.9986e-32	NaN	3.2023e-06	2.2034e-09	0.47912	6.4844e-08	4.291e-10	2.1341e-07	7.8725e-12	4.7627e-07	7.0042e-10	0.71506	0.16267	2.1489e-08	3.5133e-06	6.711e-07	1.095e-08	0.34104	1.8624e-09	3.7384e-09	1.192e-08	1.3309e-06	6.9333e-08	0.03403	3.6889e-07	0.00221	0.00035608	0.32789	7.1953e-09	1.397e-08	5.9399e-16	0.00843
Qkernel.CORE.4D	avgbs_cluster_40130.1.54	0.0199601	Mrg21	Chr4D	195.7	0.33771	0.47118	0.82873	0.77627	0.12521	0.81076	0.1901	2.8158e-16	0.77493	0.38816	0.00022579	0.34834	8.5363e-16	0.41337	0.0433	5.1262e-05	0.57553	1.4043e-05	7.5589e-05	0.00040866	2.3178e-06	0.00181	5.6245e-05	0.69719	0.53529	1.9887e-05	0.00315	0.00030159	2.9747e-05	0.76906	5.714e-05	0.00033833	2.4451e-05	0.00334	6.1918e-05	0.037	8.4214e-06	0.03542	0.00024853	0.77352	4.9251e-05	1.1352e-05	1.6134e-08	0.05857
Qkernel.CORE.4D	avgbs_6K_84661.1.59	0.0219561	Mrg21	Chr4D	195.7	0.64885	0.95798	0.25581	0.51896	0.11268	0.81179	0.8886	2.3496e-15	0.10828	0.63732	0.20694	0.01656	8.2326e-14	0.03736	0.53738	0.02918	0.82081	0.19895	0.00072793	0.05573	0.00312	0.09415	0.04794	0.73579	0.89148	0.12041	0.20597	0.11859	0.02259	0.03299	0.00048285	0.00585	0.04292	0.08486	0.02538	0.16173	0.11287	0.04983	0.07251	0.37291	0.0024	0.02179	5.6599e-10	0.19291
Qkernel.CORE.4D	avgbs_93644	0.0259481	Mrg21	Chr4D	195.7	0.73358	0.42121	0.81908	0.7221	0.23111	0.90706	0.40123	4.0831e-17	0.76565	0.19076	0.82989	0.55845	6.6524e-17	0.34954	0.70689	0.00469	0.93146	0.01721	0.00247	0.00658	4.7162e-08	0.01479	0.00473	0.39369	0.93751	0.0054	0.07059	0.01732	8.4682e-05	0.89811	0.00649	0.00273	3.1467e-06	0.03538	0.00375	0.02853	0.00292	0.10292	0.00228	0.38646	0.00116	0.00049225	1.424e-08	0.03331
Qkernel.CORE.4D	avgbs2_125480.1.16	0.0259481	Mrg21	Chr4D	195.7	0.59189	0.55395	0.07463	0.58092	0.10503	0.88867	0.80631	1.3156e-22	0.10145	0.63189	0.00051092	0.01804	2.5087e-20	0.03233	0.01364	3.9238e-06	0.5945	2.4364e-05	2.3759e-06	8.9494e-05	2.1084e-07	0.00010386	1.2967e-05	0.80484	0.83779	1.9985e-05	0.00093937	0.00017002	2.6191e-05	0.71348	5.0991e-06	2.9104e-06	5.076e-05	0.00039325	2.5978e-05	0.32401	0.00034708	0.00648	0.00239	0.34188	8.0881e-06	1.6935e-05	2.4661e-11	0.07479
Qkernel.CORE.4D	avgbs2_173880.1.23	0.0259481	Mrg21	Chr4D	195.7	0.83131	0.28148	0.17978	0.87701	0.14105	0.90556	0.67143	3.571e-22	0.27774	0.88681	0.00040844	0.00167	4.9102e-20	0.03191	0.02974	2.7024e-05	0.86304	0.00014034	1.2269e-05	0.00069054	2.062e-07	0.00050745	8.3707e-05	0.55068	0.95504	8.9986e-05	0.0039	0.00078723	0.00011509	0.7423	2.6861e-05	2.2863e-05	7.3105e-05	0.00118	0.00025523	0.09962	0.00115	0.02909	0.01241	0.67017	4.226e-05	0.00014774	8.0312e-11	0.14103
Qkernel.CORE.4D	avgbs2_3080.1.49	0.0299401	Mrg21	Chr4D	195.7	0.66668	0.07695	0.65549	0.22794	0.32405	0.49347	0.51597	1.074e-14	0.15351	0.20883	0.26332	0.49495	5.3433e-14	0.89748	0.10018	2.1602e-05	0.04262	0.00015269	2.519e-05	0.00041234	8.7157e-11	0.00031749	0.00102	0.2734	0.89574	2.3072e-05	0.05965	0.03536	0.00472	0.79856	0.00056549	1.3858e-05	8.3126e-08	0.00016161	3.7774e-06	0.05978	4.2832e-06	0.00628	0.00072703	0.33067	3.9096e-05	2.9881e-07	4.5805e-09	0.13074
Qkernel.CORE.4D	avgbs_cluster_753.1.49	0.0399202	Mrg21	Chr4D	195.7	0.78511	0.06377	0.27289	0.40957	0.24747	0.77664	0.66583	1.4207e-11	0.89727	0.64556	0.38152	0.49766	4.7299e-11	0.11447	0.2467	0.00083834	0.04971	0.00183	0.00117	0.0091	2.0254e-06	0.00414	0.03158	0.25805	0.3702	0.00063072	0.23869	0.08902	0.03924	0.88246	0.00952	0.0005029	0.00032537	0.00456	0.0001358	0.13853	0.00022571	0.00977	0.00181	0.35773	0.00113	4.1147e-05	1.7005e-07	0.25382
Qkernel.CORE.4D	avgbs_cluster_26106.1.48	0.0499002	Mrg21	Chr4D	195.7	0.2976	0.68154	0.05697	0.46636	0.85475	0.10686	0.41896	7.8879e-10	0.49928	0.69924	0.11634	0.88755	6.934e-09	0.15095	0.83955	0.18065	0.45048	0.2145	0.06058	0.08912	0.00044103	0.44994	0.16375	0.51591	0.36264	0.01991	0.26233	0.38075	0.05689	0.57618	0.13399	0.02029	0.00393	0.34714	0.08908	0.17394	0.03133	0.73414	0.03605	0.45259	0.03993	0.07419	2.3528e-05	0.70997
Qkernel.CORE.4D	avgbs2_167941.1.41	0.0598802	Mrg21	Chr4D	196.9	0.3423	0.62864	0.57642	0.47272	0.11497	0.2452	0.81509	2.0553e-06	0.28757	0.03712	0.09869	0.01189	9.7102e-07	0.4912	0.30326	0.00389	0.73987	0.00136	0.00433	0.03586	0.00024361	0.04365	0.00023519	0.81024	0.08672	0.00536	0.00616	0.0004591	0.00010294	0.3601	0.00108	0.00456	0.0005415	0.01891	0.00059549	0.12253	3.3837e-05	0.02209	0.00212	0.94156	4.6683e-05	0.00408	0.00103	0.03729
Qkernel.CORE.4D	avgbs2_75785.1.16	0.167665	Mrg21	Chr4D	198.4	0.44782	0.87382	0.05876	0.76734	0.56575	0.20016	0.27793	7.5622e-07	0.73345	0.22069	0.29953	0.9959	2.7417e-06	0.72377	0.40879	0.0418	0.27577	0.52345	0.00158	0.09849	0.07597	0.09654	0.01614	0.35878	0.66519	0.41987	0.08863	0.22249	0.00591	0.94386	0.00096001	0.01736	0.04316	0.02501	0.11586	0.16416	0.46744	0.3311	0.92469	0.02243	0.04893	0.23346	0.00086216	0.97724
Qkernel.CORE.4D	avgbs_cluster_33170.1.58	0.149701	Mrg21	Chr4D	198.5	0.23321	0.5422	0.0246	0.65718	0.52183	0.0151	0.99141	1.2917e-07	0.63533	0.11594	0.04784	0.91717	6.0851e-07	0.90445	0.21579	0.00724	0.16239	0.15524	0.00176	0.03029	0.0054	0.02389	0.00251	0.65282	0.97828	0.04984	0.0079	0.02132	0.00061797	0.55001	9.0462e-05	0.00193	0.00234	0.01376	0.0891	0.14751	0.10683	0.67996	0.42371	0.86384	0.03158	0.03285	6.7867e-05	0.42886
Qkernel.CORE.4D	avgbs_cluster_4872.1.17	0.0538922	Mrg21	Chr4D	199.4	0.94221	0.80785	0.70708	0.38756	0.49862	0.70229	0.74859	1.8947e-09	0.66093	0.28831	0.59275	0.86305	6.2323e-10	0.4516	0.57675	0.00106	0.9691	0.05023	0.00104	0.00408	0.00119	0.00126	0.00289	0.60446	0.60089	0.04778	0.00806	0.04767	0.01987	0.16528	0.00646	0.00215	0.00115	0.00061719	0.01638	0.65033	0.01093	0.49929	0.47022	0.27118	0.00974	0.02141	0.0018	0.19441
Qkernel.CORE.4D	avgbs2_175742.1.59	0.0538922	Mrg21	Chr4D	199.4	0.05551	0.68859	0.21509	0.29253	0.0135	0.46926	0.53766	5.7293e-09	0.00455	0.28921	0.00147	0.9337	1.4214e-09	0.10164	0.17323	0.00116	0.45738	0.00144	0.00075479	0.01333	3.9632e-05	0.02516	5.138e-05	0.60725	0.00803	0.00163	0.01287	0.00126	2.0699e-05	0.5684	0.00051344	0.00474	0.00031346	0.02126	0.00090335	0.06452	9.2719e-05	0.02211	0.0124	0.5008	3.0627e-05	0.00389	0.00076191	0.14139
Qkernel.CORE.4D	avgbs_cluster_10845.1.32	0.0938124	Mrg21	Chr4D	199.4	0.37541	0.71332	0.96148	0.29356	0.04871	0.50532	0.5997	7.9807e-08	0.39312	0.08632	0.0709	0.62921	2.0548e-07	0.33733	0.19768	0.01701	0.43689	0.08326	0.02018	0.00601	0.07393	0.05418	0.02318	0.7146	0.94662	0.10095	0.35712	0.13	0.01464	0.66768	0.00131	0.01317	0.02757	0.01138	0.20591	0.80709	0.24518	0.49974	0.90871	0.44485	0.08771	0.03088	0.00010158	0.9116
Qkernel.CORE.4D	avgbs_99539.1.63	0.11976	Mrg21	Chr4D	199.4	0.83871	0.8129	0.51837	0.90408	0.19884	0.59187	0.54154	1.1022e-11	0.93728	0.53976	0.13021	0.35784	1.9915e-11	0.08814	0.04299	0.0001535	0.65344	0.24485	0.00119	0.0046	0.00661	0.00037616	0.00131	0.8363	0.17832	0.29083	0.4581	0.03863	5.377e-05	0.01368	0.00108	0.00864	0.00287	0.00104	0.04272	0.62544	0.1078	0.31263	0.19186	0.06799	0.09499	0.01353	8.8225e-06	0.56994
Qkernel.CORE.4D	avgbs2_80465.1.61	0.0618762	Mrg21	Chr4D	199.6	0.81952	0.58397	0.91389	0.71733	0.4165	0.94399	0.43518	1.2295e-09	0.65879	0.38768	0.62919	0.66918	1.1126e-09	0.59663	0.41434	0.00123	0.74004	0.03557	0.00033335	0.00243	2.5731e-05	0.01001	0.00047436	0.43669	0.0275	0.06413	0.0055	0.00647	0.0003486	0.59306	0.00076794	0.00097371	5.9902e-05	0.00464	0.02526	0.41259	0.00573	0.03018	0.21516	0.25671	0.00593	0.00108	0.00104	0.21175
Qkernel.CORE.4D	avgbs_21256.1.57	0.0698603	Mrg21	Chr4D	199.7	0.96022	0.97579	0.67205	0.68608	0.26088	0.90308	0.87124	2.5777e-08	0.53112	0.99157	0.70576	0.14574	5.9563e-08	0.21716	0.76016	0.00291	0.83701	0.12683	0.00564	0.00655	0.01329	0.00405	0.0013	0.68403	0.0732	0.0944	0.04504	0.09156	0.01265	0.36391	0.00214	0.00398	0.00371	0.0022	0.00852	0.1635	0.00811	0.2824	0.23685	0.75138	0.0059	0.05417	0.00417	0.43931
Qkernel.CORE.4D	avgbs_cluster_26782.1.26	0.101796	Mrg21	Chr4D	200.4	0.33394	0.09141	0.42276	0.44933	0.01307	0.39351	0.49709	5.6164e-08	0.55158	0.51216	0.06209	0.59809	5.1576e-07	0.3909	0.34543	0.00607	0.25574	0.04481	0.00668	0.00821	0.13414	0.08341	0.01381	0.77092	0.98355	0.03254	0.34218	0.0953	0.01746	0.31722	0.00104	0.01338	0.0548	0.03459	0.23119	0.72199	0.33649	0.73821	0.48215	0.98487	0.05288	0.01709	0.00134	0.93157
Qkernel.CORE.4D	avgbs2_95154.1.34	0.267465	Mrg21	Chr4D	201.2	0.43079	0.67163	0.0607	0.7602	0.89322	0.13659	0.36339	1.0181e-06	0.22946	0.45097	0.22694	0.57292	9.7557e-07	0.20968	0.70089	0.16263	0.60046	0.9586	0.10528	0.34303	0.4261	0.10386	0.05824	0.6446	0.90036	0.88235	0.32418	0.0257	0.02168	0.33929	0.01201	0.14893	0.28607	0.02458	0.77693	0.24923	0.5246	0.89533	0.83955	0.63932	0.55727	0.66782	0.00043875	0.89234
Qkernel.CORE.4D	avgbs2_53919.1.16	0.0698603	Mrg21	Chr4D	201.5	0.52502	0.68132	0.78786	0.57273	0.40246	0.88502	0.35493	2.1174e-13	0.85597	0.88115	0.0034	0.74116	9.0237e-13	0.25463	0.11961	0.00024135	0.74269	0.0091	0.00024886	0.00135	2.5602e-05	0.00779	0.00218	0.03466	0.32361	0.00798	0.02363	0.02886	0.00060227	0.21075	0.00032699	0.00036098	0.0003241	0.00667	0.03012	0.15185	0.0037	0.64905	0.13403	0.80698	0.01874	0.00572	4.4539e-07	0.00434
Qkernel.CORE.4D	avgbs2_149259.1.22	0.0179641	Mrg21	Chr4D	204.4	0.68891	0.57429	0.57655	0.82305	0.0096	NaN	0.46638	7.4449e-28	0.07126	0.94077	1.4389e-09	0.00099399	5.8731e-27	NaN	7.8267e-06	3.2556e-06	0.43018	6.036e-06	9.9998e-09	6.8692e-05	2.2848e-09	3.2478e-06	2.021e-07	0.6671	0.23193	1.443e-06	1.0174e-05	1.2441e-06	2.2254e-07	0.12933	3.5314e-08	3.4477e-06	3.9778e-07	2.8961e-06	7.0228e-05	0.08226	0.00087115	0.0072	0.00222	0.244	9.1062e-09	1.1784e-05	7.1365e-14	0.04003
Qkernel.CORE.4D	avgbs_cluster_41176.1.35	0.0918164	Mrg21	Chr4D	204.4	0.17092	0.55259	0.53	0.718	0.09816	0.25531	0.7037	1.0976e-08	0.397	0.45848	0.01028	0.50616	1.496e-08	0.63012	0.04294	0.00161	0.41449	0.02457	0.00114	0.00353	0.00238	0.00161	0.02878	0.41714	0.81388	0.03576	0.11983	0.14943	0.03257	0.6665	0.00158	0.00132	0.00487	0.00314	0.10318	0.94043	0.0664	0.17793	0.48106	0.88597	0.03573	0.02054	0.00024014	0.84532
Qkernel.CORE.4D	avgbs_cluster_43826.1.22	0.0239521	Mrg21	Chr4D	205.3	0.64366	0.47326	0.58926	0.63929	0.83023	0.34347	0.20089	1.2705e-39	0.29555	0.61889	4.3116e-09	0.08138	2.8748e-36	0.93608	3.0256e-06	2.9569e-13	0.33033	3.2348e-08	6.3014e-14	6.856e-09	7.446e-15	1.9651e-11	3.0763e-12	0.91539	0.2068	3.0639e-07	2.8335e-09	9.8182e-08	5.2784e-10	0.21727	6.5204e-12	1.0408e-09	6.1002e-11	1.655e-09	1.0201e-09	0.06899	8.6096e-08	0.00186	0.00056041	0.12527	8.76e-12	4.1124e-09	2.1039e-22	0.11197
Qkernel.CORE.4D	avgbs_cluster_25445.1.6	0.0379242	Mrg21	Chr4D	205.3	0.87898	0.67468	0.94391	0.60698	0.74635	0.75046	0.83143	1.9541e-28	0.57532	0.01348	1.0274e-06	0.05719	1.8065e-25	0.2624	3.2581e-06	2.2407e-10	3.7808e-05	6.7071e-08	2.2178e-12	4.4148e-08	1.2103e-12	2.5594e-07	1.4114e-09	0.01569	0.16161	2.2565e-07	1.5178e-06	9.5216e-07	1.49e-06	0.10392	1.1632e-11	4.0213e-09	1.559e-09	1.7001e-06	6.6859e-07	0.01477	1.8428e-07	0.02146	0.00499	0.24221	4.2496e-08	1.6601e-06	3.7889e-12	0.12742
Qkernel.CORE.4D	avgbs_206169	0.0399202	Mrg21	Chr4D	205.3	0.14044	0.5679	0.33454	0.15454	0.23947	0.16568	0.49365	1.1905e-26	0.95891	0.10376	9.7905e-07	0.01432	4.8822e-24	0.27676	0.00023937	1.0201e-10	0.15015	2.2444e-07	4.4179e-11	1.0236e-07	9.9913e-13	3.9699e-08	3.9346e-10	0.53447	0.22317	7.6636e-08	2.3723e-06	9.4607e-08	4.472e-08	0.05349	4.1874e-10	1.0377e-09	8.5655e-10	4.2669e-07	1.162e-07	0.422	1.8778e-07	0.01616	0.00147	0.07546	3.0852e-07	2.0222e-06	6.8378e-15	0.00066387
Qkernel.CORE.4D	avgbs_85834.1.33	0.0419162	Mrg21	Chr4D	205.3	0.72353	0.50761	0.59712	0.59119	0.8047	0.2925	0.71036	3.7853e-23	0.42259	0.17168	2.6483e-05	0.09062	2.9165e-20	0.88464	0.00098601	1.9209e-11	0.26217	5.2512e-09	6.326e-13	7.335e-09	1.4994e-11	1.0681e-07	1.2537e-10	0.39099	0.03113	5.1449e-08	1.9127e-07	1.021e-07	3.0848e-07	0.00696	2.8974e-11	1.203e-09	1.9039e-08	4.1728e-07	2.1905e-07	0.06882	1.1026e-07	0.00788	0.01382	0.02754	1.7719e-08	7.2579e-07	7.8433e-10	0.02773
Qkernel.CORE.4D	avgbs_74131.1.24	0.0399202	Mrg21	Chr4D	205.4	0.59377	0.8713	0.97017	0.56192	0.7238	0.61771	0.49491	3.7225e-28	0.00091269	0.3486	1.743e-06	0.00289	1.2192e-25	0.75573	7.6249e-05	1.4603e-09	0.18238	3.4319e-06	5.0749e-11	2.594e-07	3.9164e-10	2.9519e-07	3.9146e-08	0.90277	0.2954	2.8317e-06	2.3901e-05	3.1988e-06	4.7241e-06	0.18061	9.4208e-10	7.0065e-08	3.0479e-07	2.123e-06	3.6197e-05	0.02594	5.0263e-05	0.04306	0.03141	0.40453	5.1529e-06	1.6256e-05	6.4521e-14	0.25743
Qkernel.CORE.4D	avgbs2_32200.1.38	0.0818363	Mrg21	Chr4D	205.4	0.20893	0.68454	0.59414	0.79323	0.08026	0.55094	0.67796	3.8759e-16	0.60498	0.2196	0.00274	0.30364	1.3044e-14	0.98093	0.09912	7.3566e-05	0.91798	0.00507	3.2124e-05	0.00031054	9.2828e-05	0.00336	0.0038	0.18581	0.5463	0.00278	0.09737	0.02631	0.01467	0.55526	3.538e-05	0.00020036	0.0028	0.00849	0.00425	0.66148	0.00909	0.61859	0.13336	0.52588	0.00227	0.00095402	4.1712e-09	0.72209
Qkernel.CORE.4D	avgbs_cluster_37295.1.28	0.103792	Mrg21	Chr4D	205.7	0.25751	0.39198	0.54969	0.56827	0.04409	0.63407	0.45242	1.5053e-10	0.72683	0.45469	0.06484	0.1105	1.1439e-09	0.53601	0.05483	0.00059851	0.9525	0.01733	0.00373	0.00371	0.00399	0.00882	0.00488	0.92202	0.88978	0.02142	0.15765	0.15885	0.00738	0.9832	0.0006728	0.01202	0.01693	0.00644	0.05602	0.69719	0.08274	0.67956	0.38687	0.69352	0.0173	0.01174	0.00015841	0.2609
Qkernel.CORE.4D	avgbs_cluster_39821.1.8	0.219561	Mrg21	Chr4D	205.7	0.14463	0.67124	0.00168	0.59835	0.29112	0.00394	0.62958	4.8024e-07	0.14231	0.25673	0.01373	0.90339	1.0569e-05	0.65515	0.00739	0.00020526	0.84148	0.00011844	0.00017238	0.00182	0.022	0.00124	0.00948	0.21471	0.69056	0.00831	0.08159	0.05361	0.01492	0.91522	0.00162	0.00932	0.04848	0.007	0.07283	0.17809	0.16593	0.18735	0.24801	0.63294	0.05145	0.07353	5.7338e-05	0.67082
Qkernel.CORE.4D	avgbs_cluster_64902.1.12	0.277445	Mrg21	Chr4D	205.7	0.5723	0.84044	0.01691	0.31966	0.23528	0.87026	0.94941	7.8139e-07	0.66444	0.6276	0.02593	0.01929	1.0413e-05	0.09949	0.00194	0.05081	0.91303	0.14074	0.02303	0.12746	0.00175	0.08154	0.00694	0.16214	0.89467	0.02267	0.00987	0.0527	0.00401	0.44413	0.00070073	0.0139	0.00124	0.02639	0.25407	0.01829	0.13568	0.32397	0.29844	0.46755	0.08081	0.05687	0.0003275	0.53955
Qkernel.CORE.4D	avgbs2_91467.1.47	0.0698603	Mrg21	Chr4D	207	0.7269	0.84622	0.98564	0.99611	0.58383	0.44138	0.60539	1.2316e-10	0.87339	0.84255	0.95571	0.75965	8.6199e-10	0.7021	0.99526	0.00067154	0.73696	0.00251	0.00093124	0.00125	0.00020827	0.00311	0.00704	0.94767	0.86331	0.00569	0.04262	0.04652	0.05224	0.24755	0.00205	0.00053338	0.00172	0.00856	0.10745	0.05159	0.0057	0.82367	0.92971	0.86816	0.01073	0.0023	2.824e-05	0.78051
Qkernel.CORE.4D	avgbs_cluster_4368.1.32	0.0758483	Mrg21	Chr4D	207.4	0.3029	0.26759	0.26082	0.19786	0.12015	0.37057	0.29135	1.6544e-14	0.50675	0.45534	0.01621	0.00222	1.8965e-12	0.88313	0.74314	0.00057022	0.89091	0.00548	0.0011	0.00069402	1.92e-05	0.00393	0.0067	0.68904	0.02809	0.0058	0.13148	0.06382	0.09397	0.78821	0.00139	0.00096553	0.00052283	0.00957	0.00642	0.34235	0.01993	0.04278	0.13074	0.84333	0.0011	6.2352e-05	5.0843e-06	0.54637
Qkernel.CORE.4D	avgbs_84541.1.20	0.0978044	Mrg21	Chr4D	207.5	0.09812	0.77739	0.96017	0.08635	0.0308	0.1201	0.39763	2.6594e-07	0.28947	0.76366	0.43316	0.79473	3.5445e-07	0.22721	0.85548	0.00173	0.00164	0.00083565	0.06638	0.00557	0.0008845	0.01417	0.01028	0.59569	0.55936	0.00093627	0.36457	0.02104	0.01234	0.36648	0.10192	0.00231	0.0078	0.01349	0.15929	0.41446	0.01809	0.97499	0.26065	0.49328	0.12811	0.01751	0.00349	0.35872
Qkernel.CORE.4D	avgbs2_160606.1.12	0.0339321	Mrg21	Chr4D	210.8	0.85873	0.34298	0.88398	0.55353	0.92752	0.59083	0.66763	8.1418e-27	0.40894	0.04876	0.00235	0.11219	2.5394e-24	0.35531	0.00264	3.4258e-09	9.414e-05	2.0956e-07	1.1055e-10	3.0593e-07	2.3012e-11	4.0127e-07	6.662e-08	0.01829	0.36969	7.3354e-07	7.3958e-06	3.6329e-06	1.1903e-06	0.11279	3.2904e-10	4.9523e-08	1.7046e-08	4.8371e-06	0.00011431	0.00148	1.1688e-05	0.05792	0.03426	0.68579	2.4823e-06	1.622e-05	8.2037e-13	0.42298
Qkernel.CORE.4D	avgbs_cluster_23173.1.13	0.0678643	Mrg21	Chr4D	210.9	0.15105	0.59619	0.75338	0.41738	0.10403	0.51437	0.36564	2.1984e-15	0.61639	0.65262	0.00125	0.42353	3.5604e-14	0.43649	0.04499	2.7102e-05	0.66937	0.00087613	3.5057e-05	0.00016858	1.9936e-05	0.00106	0.00102	0.98832	0.78715	0.00118	0.04258	0.02276	0.00499	0.23554	0.00010991	4.2505e-05	0.00051213	0.00229	0.00608	0.56684	0.00101	0.96198	0.16609	0.59649	0.00608	0.00075454	1.096e-07	0.27407
Qkernel.CORE.4D	avgbs_201051.1.49	0.0598802	Mrg21	Chr4D	211.1	0.37336	0.98059	0.90255	0.79099	0.12102	0.59777	0.40974	1.0666e-11	0.21842	0.50143	0.15528	0.41486	8.2915e-11	0.92498	0.19208	0.00432	0.63261	0.07357	0.00053204	0.01203	0.00088219	0.05097	0.03184	0.86209	0.09552	0.07748	0.04961	0.08296	0.25405	0.77859	0.00161	0.00649	0.01046	0.04934	0.04473	0.39667	0.0384	0.31226	0.27457	0.84015	0.00137	0.00061725	3.0599e-06	0.79445
Qkernel.CORE.4D	avgbs_206169.1.47	0.0479042	Mrg21	Chr4D	211.2	0.09805	0.83192	0.29555	0.3652	0.44477	0.14569	0.59455	1.4428e-25	0.91826	0.14172	5.8608e-06	0.05253	4.9744e-23	0.39323	0.00086728	4.884e-10	0.32497	7.3302e-07	1.9881e-10	4.7396e-07	8.2089e-12	1.6263e-07	2.5543e-09	0.38785	0.3509	3.7032e-07	1.3506e-05	6.1317e-07	2.3786e-07	0.11355	2.1489e-09	6.4414e-09	5.0176e-09	2.155e-06	5.4909e-07	0.49228	1.4064e-06	0.05237	0.00557	0.1192	1.7745e-06	7.0463e-06	2.857e-14	0.00275
Qkernel.CORE.4D	avgbs2_173620.1.11	0.0538922	Mrg21	Chr4D	211.6	0.98981	0.76348	0.81395	0.97875	0.50635	0.44671	0.87143	4.8325e-19	0.00067934	0.0418	0.00165	0.21541	1.3616e-16	0.34072	0.01173	4.0483e-08	0.24383	1.2689e-05	1.3318e-06	1.0141e-06	6.5663e-09	2.9169e-07	3.6374e-07	0.98533	0.03476	3.0029e-05	0.00050895	4.3822e-05	5.0017e-05	0.17213	9.9541e-07	2.5054e-07	9.3499e-07	3.1993e-06	0.00032996	0.11901	0.00047827	0.01374	0.06436	0.9628	0.00048503	0.00010245	1.6458e-07	0.84204
Qkernel.CORE.4D	avgbs_100868.1.10	0.0738523	Mrg21	Chr4D	211.7	0.47578	0.46656	0.99024	0.4657	0.44036	0.72092	0.13363	5.5151e-28	0.75997	0.04091	0.0003658	0.17252	1.9735e-25	0.15959	1.4874e-05	2.3861e-11	0.42484	1.5436e-06	8.0839e-10	2.7864e-08	4.4148e-10	4.7449e-11	2.3628e-09	0.26608	0.84806	1.4847e-06	2.7245e-06	3.1144e-06	6.2638e-08	0.16188	7.1782e-09	1.9904e-09	1.0236e-07	4.686e-10	1.5766e-05	0.01222	1.8823e-05	0.00983	0.02119	0.25319	2.7533e-06	1.5318e-07	4.8987e-11	0.00308
Qkernel.CORE.4D	avgbs_cluster_40185.1.22	0.0319361	Mrg21	Chr4D	211.9	0.18185	0.21149	0.62413	0.3871	0.56271	0.01081	0.02844	1.3541e-46	0.34748	8.5357e-05	9.5888e-10	0.00041591	4.0419e-44	2.3587e-05	3.5396e-06	2.0179e-17	0.4099	1.8675e-06	7.907e-18	1.5932e-11	2.6827e-20	6.1504e-15	5.7757e-15	0.84656	0.2298	7.0208e-07	1.4138e-10	4.6036e-09	4.3625e-12	0.01163	1.31e-12	2.9059e-13	4.4124e-15	1.682e-12	7.7378e-10	0.05329	4.6511e-07	0.0006952	0.00041987	0.03498	4.9e-11	4.4892e-10	3.297e-26	0.04449
Qkernel.CORE.4D	avgbs_cluster_7805.1.9	0.0299401	Mrg21	Chr4D	212.1	0.09703	0.79782	0.04839	0.10107	0.70949	0.0024	0.0764	1.1335e-51	0.21207	1.4147e-07	2.4283e-22	1.8611e-06	1.3271e-49	1.799e-05	2.8677e-14	1.8935e-19	0.54585	1.2224e-08	6.7329e-19	7.7367e-13	2.7039e-20	6.3867e-16	2.4491e-17	0.66524	0.16898	3.0136e-09	2.7511e-11	7.2031e-11	1.579e-13	0.06896	8.0921e-16	2.3887e-15	3.1951e-15	2.7897e-13	8.1236e-12	0.1391	2.9434e-09	7.2366e-05	0.00013216	0.00591	1.3388e-12	2.461e-10	6.2907e-29	0.02757
Qkernel.CORE.4D	avgbs_cluster_14288.1.12	0.0179641	Mrg21	Chr4D	213.8	0.01853	0.3263	0.09587	0.40259	0.05235	0.18522	0.35149	1.4784e-21	0.90757	0.70392	1.9579e-05	0.32562	1.6368e-20	0.65863	0.00532	8.4889e-06	0.78758	0.00076191	2.751e-07	0.00011867	6.7441e-07	0.00105	3.3709e-05	0.15283	0.08973	0.0004469	0.00084682	0.00044503	0.00061408	0.64313	8.1696e-06	1.9634e-05	3.6066e-05	0.00282	0.00049876	0.16164	0.00033887	0.13657	0.02453	0.03558	1.8688e-05	0.00014927	5.2256e-11	0.09636
Qkernel.CORE.4D	avgbs_228615.1.62	0.0718563	Mrg21	Chr4D	215.2	0.1066	0.63143	0.48823	0.63694	0.21463	0.27329	0.30758	5.2568e-14	0.92741	0.93127	0.01165	0.75331	2.7989e-13	0.58425	0.03647	5.6601e-05	0.7347	0.00197	5.3934e-05	0.0001225	3.0234e-05	0.00253	0.00214	0.68525	0.51573	0.00128	0.05436	0.041	0.02584	0.0531	9.5331e-05	4.4767e-05	0.00089621	0.00746	0.00769	0.79586	0.00238	0.85578	0.08649	0.44411	0.00555	0.00056118	3.1951e-06	0.40088
Qkernel.CORE.4D	avgbs_231197.1.25	0.0279441	Mrg24	Chr5A	19.4	0.30481	0.56754	0.09772	0.78403	0.0924	0.82404	0.03794	3.0298e-11	0.80507	0.01894	0.07085	0.83783	1.7008e-10	0.00644	0.06398	0.00093852	0.54215	0.10975	0.00277	0.01243	4.5861e-10	4.3039e-05	0.00296	0.53787	0.43935	0.08666	0.0022	0.12025	0.00713	0.81407	0.00597	0.02247	8.6527e-07	0.00015474	0.0002347	0.13789	0.01233	0.00068229	0.11045	0.26907	0.0003609	0.00488	3.1174e-05	0.58572
Qkernel.CORE.4D	avgbs_cluster_29588.1.10	0.0179641	Mrg24	Chr5A	23.1	0.73401	0.46844	0.33987	0.86907	0.08536	0.0435	0.02074	2.0949e-08	0.4065	0.00553	0.02447	0.8462	7.9378e-08	0.02594	0.07537	0.00822	0.21283	0.43511	0.02633	0.02615	2.0992e-08	0.00049074	0.01871	0.5179	0.88116	0.30176	0.00702	0.10652	0.0698	0.21566	0.02359	0.06016	9.9977e-06	0.00369	0.00122	0.36316	0.13141	0.00237	0.11294	0.15293	0.00822	0.02244	0.00012534	0.64648
Qkernel.CORE.4D	avgbs2_160713.1.21	0.0179641	Mrg24	Chr5A	23.1	0.00145	0.90254	0.21433	0.02442	0.00467	0.16858	0.00119	4.6872e-11	0.53992	0.00571	0.00171	0.33954	4.7398e-10	0.00827	0.01866	3.7096e-05	0.12957	0.06787	0.00016101	0.00028578	2.4045e-08	3.0992e-06	2.2235e-06	0.47899	0.00908	0.00858	1.7569e-05	0.00010766	6.3794e-05	0.3002	0.00027775	0.0001071	1.5234e-05	4.7846e-05	6.0169e-06	0.34858	0.00505	3.2263e-05	0.03989	0.12079	4.7677e-05	0.00066492	0.00044115	0.68858
Qkernel.CORE.4D	avgbs_cluster_43685.1.31	0.0219561	Mrg24	Chr5A	23.1	0.69927	0.49503	0.62605	0.16971	0.02094	0.15215	0.02094	1.9036e-08	0.62466	0.00421	0.04518	0.84721	7.914e-08	0.01534	0.08606	0.00854	0.23195	0.5316	0.0262	0.03746	1.5999e-08	0.0005493	0.0242	0.62973	0.89602	0.30465	0.0115	0.16573	0.08698	0.86514	0.01741	0.07681	9.2141e-06	0.00447	0.00269	0.58564	0.09064	0.00908	0.12699	0.47922	0.00626	0.02836	0.00012541	0.70213
Qkernel.CORE.4D	avgbs_cluster_18879.1.32	0.127745	Mrg24	Chr5A	41	0.15641	0.24071	0.19086	0.4468	0.21617	0.47014	0.37121	1.2075e-08	0.62318	0.37305	0.00927	0.09662	2.2841e-08	0.10508	0.00336	0.0053	0.07339	0.13848	0.04668	0.00733	0.57963	0.00273	0.00258	0.79404	0.04615	0.0462	0.08808	0.01312	0.00211	0.17029	0.01408	0.00177	0.2106	0.0045	0.044	0.19252	0.30393	0.06066	0.05961	0.06549	0.1568	0.11994	6.4446e-06	0.68953
Qkernel.CORE.4D	avgbs2_44683.1.24	0.011976	Mrg24	Chr5A	41.7	0.21561	0.62435	0.84907	0.18503	0.60487	0.38447	0.45319	2.3018e-07	0.59195	0.07752	2.1462e-05	0.08893	1.362e-07	0.20211	0.00457	0.00568	0.31111	0.90643	0.00036382	0.00361	0.01326	0.01889	0.00747	0.80982	0.24085	0.57864	0.01763	0.00076681	0.06542	0.02643	0.00094453	0.00721	0.01191	0.02274	0.163	0.21333	0.40742	0.71405	0.12912	0.97078	0.02295	0.03231	0.00011307	0.00136
Qkernel.CORE.4D	avgbs2_80484.2.57	0.0139721	Mrg24	Chr5A	41.8	0.17413	0.33573	0.94896	0.38075	0.99761	0.46599	0.65131	1.7633e-07	0.0506	0.01094	0.92568	0.20147	6.7914e-08	0.38245	0.96183	0.02019	0.40051	0.98972	0.00135	0.02646	0.02899	0.05909	0.03076	0.45865	0.12173	0.88126	0.0979	0.00417	0.23533	0.05452	0.00793	0.03891	0.03965	0.0738	0.1977	0.31428	0.53845	0.69104	0.19386	0.22035	0.0444	0.07944	3.8337e-05	0.00479
Qkernel.CORE.4D	avgbs_cluster_44670.1.41	0.00998004	Mrg24	Chr5A	41.9	0.06978	0.29597	0.95796	0.19832	0.95771	0.61182	0.6613	2.1874e-07	0.02632	0.00664	0.97967	0.08864	7.4664e-08	0.26568	0.69857	0.03325	0.23242	0.86323	0.00352	0.02546	0.03835	0.07092	0.05441	0.93516	0.47361	0.67646	0.09371	0.00452	0.28451	0.06561	0.00837	0.04258	0.03442	0.06747	0.41177	0.17327	0.71063	0.9378	0.22681	0.73842	0.06716	0.13947	1.267e-05	0.00107
Qkernel.CORE.4D	avgbs2_146624.1.63	0.111776	Mrg03	Chr5C	25	0.04061	0.14825	0.26341	0.29023	0.19485	0.22627	0.50314	1.0117e-08	0.50558	0.63225	0.60286	0.69308	1.6109e-07	0.07371	0.02082	0.0067	0.63383	0.5173	0.02326	0.07478	0.63884	0.00651	0.00081456	0.20405	0.09168	0.11494	0.01801	0.00533	0.00223	0.00869	0.00404	0.01033	0.15342	0.009	0.15887	0.71535	0.09732	0.62108	0.4827	0.53658	0.25532	0.2055	7.6521e-05	0.70691
Qkernel.CORE.4D	avgbs_69754.1.31	0.0279441	Mrg03	Chr5C	63.6	0.03689	0.40302	0.46306	0.04411	0.00985	0.00768	0.09562	2.5598e-05	0.25544	0.01266	0.20521	0.27489	0.00012937	0.64163	0.48001	0.07333	0.00065519	0.09673	0.07269	0.08564	0.06872	0.2079	0.07085	0.20205	0.79302	0.08945	0.42659	0.02403	0.26456	0.60344	0.12139	0.06418	0.08698	0.40299	0.33189	0.02294	0.02246	0.19781	0.77209	0.5527	0.57153	0.35755	7.97e-05	1.6407e-05
Qkernel.CORE.4D	avgbs_cluster_41468.1.60	0.0199601	Mrg03	Chr5C	63.7	0.54763	0.67767	0.24728	0.4763	0.94281	0.30587	0.80041	3.318e-11	0.83146	0.06186	0.00142	0.55647	1.354e-09	0.14873	0.21342	1.1631e-05	0.51615	0.00099797	1.4113e-05	2.6865e-05	2.5267e-05	0.00105	0.00021	0.4058	0.44524	0.00595	0.00043012	7.5594e-05	0.02854	0.02049	0.00087911	8.176e-05	0.000725	0.00587	7.3001e-05	0.91547	0.0019	0.01536	0.09194	0.00671	0.00355	0.00715	1.8222e-08	0.18657
Qkernel.CORE.4D	avgbs_cluster_9272.1.35	0.0179641	Mrg03	Chr5C	63.8	0.11578	0.39695	0.10139	0.64648	0.63479	0.23032	0.71684	7.6968e-06	0.37184	0.01097	0.00046044	0.32994	1.0386e-05	0.01991	0.31698	0.00097555	0.43101	0.00396	0.0004205	0.0066	5.2047e-05	0.02964	0.00486	0.67013	0.62617	0.00331	0.0125	0.00119	0.018	0.19064	0.00687	0.00301	0.0005397	0.04242	0.0001344	0.69043	0.00017507	0.00607	0.01411	0.00512	0.01197	0.0107	2.0276e-05	0.12953
Qkernel.CORE.4D	avgbs_72059.1.58	0.0239521	Mrg03	Chr5C	65	0.57809	0.75989	0.66043	0.94803	0.6076	0.32043	0.41391	5.4322e-07	0.56877	0.06674	0.00052492	0.57693	4.5732e-06	0.16787	0.12625	0.00041247	0.89156	0.00924	0.00044845	0.00283	0.0011	0.0247	0.00624	0.85006	0.89197	0.0124	0.02115	0.00128	0.0746	0.30111	0.01253	0.00147	0.0081	0.08297	0.00159	0.92792	0.00348	0.02075	0.08293	0.03592	0.04975	0.02512	6.8742e-05	0.4291
Qkernel.CORE.4D	avgbs2_100521.1.24	0.0219561	Mrg03	Chr5C	72.7	0.13759	0.94931	0.28299	0.77148	0.26642	0.15611	0.8568	5.5717e-05	0.01709	0.03716	7.0898e-08	0.99083	1.1684e-05	0.85087	2.5802e-06	0.00669	0.78179	0.01155	0.00040751	0.00742	0.62712	0.06629	0.00741	0.32217	0.02677	0.02155	0.0547	0.00034272	0.10233	0.17204	0.01831	0.00411	0.60533	0.12855	0.36983	0.6805	0.10325	0.5853	0.15803	0.20018	0.05382	0.58646	0.00012406	0.79842
Qkernel.CORE.4D	avgbs_84568.1.18	0.185629	Mrg03	Chr5C	77.8	0.17103	0.49742	0.08501	0.79371	0.09832	0.88751	0.47881	0.86019	0.12092	5.0581e-07	2.4621e-08	0.6957	0.62475	0.09248	0.00010356	0.19799	0.25905	0.83836	0.33053	0.49277	0.92589	0.30406	0.76565	0.50769	0.77207	0.75854	0.65342	0.52675	0.5903	0.39672	0.90537	0.88871	0.50226	0.43193	0.42231	0.20489	0.59565	0.92913	0.27437	0.02183	0.76342	0.85787	0.31604	0.69466
Qkernel.CORE.4D	avgbs2_12158.1.22	0.0199601	Mrg03	Chr5C	101.6	0.24725	0.60609	0.402	0.76699	0.77723	0.46236	0.93573	1.3128e-08	0.86169	0.02766	0.00054403	0.62153	1.7106e-07	0.20871	0.06417	0.00011005	0.89633	0.00597	0.00013052	0.00113	0.000569	0.01262	0.00283	0.57675	0.89341	0.00458	0.01641	0.00090991	0.09773	0.17609	0.00563	0.00041848	0.00448	0.05102	0.00037556	0.01615	0.00189	0.02404	0.06214	0.00241	0.04963	0.01958	1.7021e-06	0.21915
Qkernel.CORE.4D	avgbs2_62824.1.22	0.343313	Mrg06	Chr5D	25.2	0.84925	0.97861	0.70425	0.59053	0.51513	0.58612	0.63233	2.9794e-06	0.78581	0.34098	0.75833	0.47239	7.5329e-07	0.88879	0.33099	0.14258	0.1419	0.76827	0.30199	0.40972	0.98718	0.27992	0.04866	0.18795	0.34811	0.21819	0.5175	0.34241	0.13294	0.39488	0.17028	0.14151	0.93269	0.33042	0.3442	0.61594	0.16845	0.8246	0.5	0.08498	0.18036	0.66952	0.00436	0.98799
Qkernel.CORE.4D	avgbs_cluster_12353.1.22	0.345309	Mrg06	Chr5D	25.2	0.84579	0.97912	0.70425	0.59302	0.51354	0.58612	0.63166	2.7065e-06	0.76877	0.33619	0.75059	0.46079	6.8287e-07	0.88879	0.32474	0.14181	0.14471	0.76254	0.2993	0.41754	0.98718	0.27641	0.04887	0.18677	0.35522	0.21363	0.51399	0.33713	0.13508	0.38805	0.16816	0.14618	0.93269	0.32528	0.33407	0.62818	0.16798	0.82398	0.48464	0.08938	0.16938	0.66096	0.00464	0.95753
Qkernel.CORE.4D	avgbs2_136518.1.60	0.181637	Mrg06	Chr5D	38	0.00087705	0.65517	0.21001	0.07661	0.00047193	0.01056	0.00456	0.68466	0.67097	0.13595	0.434	0.35564	0.45072	0.70397	0.19849	0.69635	0.29507	0.91998	0.60994	0.56895	0.24531	0.19927	0.35862	0.85035	0.7952	0.75394	0.23758	0.14489	0.56329	0.30894	0.65682	0.73425	0.19916	0.12602	0.3756	0.2157	0.53184	0.33202	0.96928	0.01513	0.50479	0.80782	0.06995	3.1745e-08
Qkernel.CORE.4D	avgbs_cluster_22121.1.11	0.159681	Mrg06	Chr5D	53.3	0.57743	0.83433	0.59735	0.27898	0.78293	0.47641	0.97979	7.6288e-07	0.55166	0.66414	0.47808	0.65136	3.0097e-06	0.48837	0.19091	0.07617	0.36778	0.1647	0.29376	0.14285	0.00019991	0.04018	0.04284	0.09231	0.08666	0.16218	0.0212	0.39152	0.03123	0.21223	0.33689	0.08883	0.00333	0.04279	0.00056108	0.4061	0.00684	0.02562	0.03415	0.3228	0.00698	0.01941	0.00021037	0.74993
Qkernel.CORE.4D	avgbs_223490.1.34	0.0359281	Mrg06	Chr5D	116	0.46719	0.3084	0.72133	0.04992	0.44455	0.84217	0.83961	5.1281e-07	0.00163	0.42427	0.94065	0.76449	9.8687e-06	0.88115	0.79445	0.04955	0.53816	0.20945	0.28972	0.07986	0.10725	0.03593	0.0706	0.67299	0.82731	0.41571	0.47756	0.38036	0.01749	0.46645	0.5719	0.04427	0.1696	0.09806	0.02373	0.18979	0.09573	0.68516	0.64068	0.00561	0.8001	0.28507	0.00029012	0.30942
Qkernel.CORE.4D	avgbs_204284.1.23	0.0159681	Mrg05	Chr6A	6.1	0.95145	0.27963	0.5782	0.60604	0.45615	0.12918	0.18289	7.85e-14	0.12577	0.7754	0.30452	0.5375	4.7092e-13	0.70272	0.71228	0.00031761	0.40973	0.01292	0.00567	0.0142	0.90748	0.00041061	0.00204	0.46819	0.09975	0.09809	0.28198	0.1989	0.00115	0.12772	0.01602	0.02486	0.49232	0.00464	0.07398	0.2146	0.00634	0.88399	0.4094	0.04002	0.14519	0.26701	4.1568e-08	0.54618
Qkernel.CORE.4D	avgbs2_138042.1.17	0.0299401	Mrg05	Chr6A	56.5	0.01091	0.33816	0.07403	0.58615	0.01347	0.42571	0.09757	2.993e-06	0.15927	0.1597	0.05965	0.0178	7.1802e-08	0.39782	0.04412	0.13662	0.55908	0.42563	0.00795	0.22935	0.00060738	0.02706	0.09953	0.76671	0.69891	0.47047	0.41327	0.01871	0.1094	0.96308	0.00242	0.10636	0.00177	0.02028	0.21844	0.91938	0.93527	0.02856	0.45003	0.22275	0.00917	0.41612	0.00023167	0.73505
Qkernel.CORE.4D	avgbs_cluster_24844.1.53	0.295409	Mrg05	Chr6A	56.5	0.00499	0.72199	0.08134	0.04176	0.07288	0.02589	0.0177	0.89609	0.74855	0.91808	0.27703	0.16508	0.87758	0.64984	0.50265	0.42754	0.09024	0.23673	0.64632	0.45481	0.31081	0.21269	0.13045	0.4331	0.07171	0.31455	0.2863	0.03493	0.42725	0.08989	0.30573	0.46341	0.03675	0.23007	0.38451	0.43318	0.11082	0.55797	0.17715	0.45491	0.23554	0.51965	0.36481	0.00018002
Qkernel.CORE.4D	avgbs2_43974.1.44	0.0279441	Mrg05	Chr6A	57.6	0.09718	0.75157	0.36693	0.45293	0.36516	0.11246	0.79367	0.00068358	0.00018116	4.8968e-08	2.9311e-07	0.02067	0.00268	0.21754	5.5482e-05	0.09692	0.79885	0.69729	0.03677	0.17767	0.02283	0.06362	0.06061	0.32426	0.0827	0.3887	0.2388	0.08504	0.10128	0.16894	0.03193	0.03839	0.02907	0.04247	0.01553	0.059	0.01401	0.03442	0.09654	0.02917	0.0051	0.05145	0.03001	0.57049
Qkernel.CORE.4D	avgbs2_107436.1.17	0.0139721	Mrg05	Chr6A	81.8	0.1526	0.86774	0.22441	0.38363	0.39824	0.8269	0.7671	3.7666e-13	0.14712	3.4778e-07	3.5991e-08	0.24207	1.2299e-13	0.69351	7.5872e-05	0.03183	0.71982	0.59436	0.0041	0.05816	0.03366	0.06729	0.11642	0.92915	0.59828	0.92192	0.51345	0.07373	0.26011	0.19337	0.04751	0.09879	0.05816	0.08065	0.30624	0.79471	0.49692	0.92766	0.43333	0.39167	0.12202	0.3311	3.5985e-14	0.28898
Qkernel.CORE.4D	avgbs2_123907.2.36	0.133733	Mrg05	Chr6A	83.2	0.69218	0.93528	0.61268	0.67819	0.97235	0.87708	0.51223	8.749e-16	0.18002	0.66745	0.36536	0.03954	1.2267e-15	0.6364	0.47276	0.00045195	0.16744	0.0971	0.00212	0.03699	0.00634	0.00097298	0.00175	0.22862	0.32483	0.158	0.02605	0.40323	0.00070818	0.6222	0.00621	0.02031	0.05408	0.00454	0.0065	0.01333	0.00015207	0.19282	0.04084	0.67358	0.00231	0.01547	2.1508e-09	0.55322
Qkernel.CORE.4D	avgbs_cluster_7619.1.13	0.183633	Mrg05	Chr6A	122.7	0.87332	0.33619	0.5575	0.26085	0.06018	0.34844	0.89664	0.94544	0.41373	0.13523	0.2012	0.42953	0.86172	0.46667	0.78749	0.36881	0.8314	0.53884	0.36139	0.70906	0.29407	0.40256	0.82931	0.00372	0.47535	0.25011	0.71491	0.38626	0.15615	0.62647	0.66574	0.68408	0.2728	0.281	0.68525	0.27153	0.4364	0.20651	0.7029	0.91716	0.37669	0.59759	0.07062	0.00376
Qkernel.CORE.4D	avgbs_85583.1.45	0.281437	Mrg17	Chr6C	32.2	0.00079594	0.46985	0.2165	0.02779	0.0006843	0.00798	0.00334	0.76777	0.69904	0.97561	0.36306	0.44629	0.57436	0.88044	0.30724	0.81326	0.74662	0.96247	0.71044	0.56562	0.87236	0.3633	0.47794	0.22175	0.91354	0.76382	0.45142	0.20207	0.94297	0.57602	0.90115	0.93773	0.479	0.23759	0.97312	0.65173	0.57048	0.51912	0.99216	0.69231	0.81146	0.67614	0.08322	3.6669e-08
Qkernel.CORE.4D	avgbs_50888.1.38	0.0818363	Mrg17	Chr6C	49.3	0.70313	0.92398	0.59884	0.22467	0.74359	0.84058	0.91721	1.021e-12	0.42082	0.34534	0.52278	0.55356	2.7803e-12	0.87473	0.72809	0.00158	0.37522	0.52996	0.01052	0.09691	0.67618	0.00157	0.00691	0.80213	0.24115	0.51898	0.34758	0.3145	0.00154	0.20495	0.0434	0.04421	0.55178	0.01005	0.059	0.84207	0.02415	0.61703	0.42276	0.06257	0.23313	0.27967	7.4557e-09	0.31226
Qkernel.CORE.4D	avgbs_84334.1.27	0.173653	Mrg17	Chr6C	51.3	0.79593	0.87111	0.48903	0.8608	0.81094	0.69557	0.01419	1.832e-06	0.03434	0.01384	0.34608	0.38078	3.9098e-06	0.40468	0.79999	0.11821	0.61502	0.38539	0.0894	0.37555	0.69968	0.38908	0.03825	0.48682	0.11762	0.18233	0.46693	0.494	0.00306	0.38024	0.04011	0.12963	0.4199	0.42048	0.306	0.46615	0.38296	0.84264	0.09533	0.23009	0.16839	0.85732	5.92e-05	0.03952
Qkernel.CORE.4D	avgbs_cluster_11224.1.46	0.0279441	Mrg17	Chr6C	69.5	0.00229	0.83058	0.25834	0.08507	0.01188	0.00525	0.00216	0.028	0.61309	0.0001524	2.5977e-08	0.00025417	0.00939	1.9139e-05	1.8335e-06	0.46065	0.25923	0.90756	0.6537	0.32059	0.01334	0.26122	0.22932	0.89162	0.69204	0.68931	0.08987	0.14949	0.36871	0.17559	0.4287	0.21947	0.00811	0.12675	0.3829	0.38217	0.77285	0.09511	0.76145	0.27889	0.44984	0.36188	0.09973	0.50754
Qkernel.CORE.4D	avgbs_cluster_2554.1.20	0.011976	Mrg17	Chr6C	89.4	0.02563	0.2455	0.31157	0.16378	0.1748	0.15834	0.12076	0.00029291	0.07906	6.4911e-07	3.7215e-06	0.41627	8.9829e-05	0.02471	0.00771	0.92569	0.53185	0.14331	0.79502	0.74021	0.06007	0.98756	0.41095	0.05269	0.92728	0.1199	0.04795	0.4566	0.13288	0.13611	0.41089	0.14103	0.08384	0.81801	0.52674	0.79884	0.32743	0.60171	0.0999	0.88903	0.40657	0.78628	3.1143e-07	0.25714
Qkernel.CORE.4D	avgbs_cluster_40739.1.19	0.0199601	Mrg17	Chr6C	89.4	0.76122	0.19678	0.59391	0.36645	0.65807	0.88817	0.77123	0.07206	0.07197	0.03534	0.03768	0.69209	0.05238	0.55208	0.50243	0.46598	0.04719	0.86814	0.4397	0.58694	0.18358	0.92962	0.84044	0.64893	0.96876	0.98816	0.96271	0.74931	0.38987	0.75596	0.57779	0.69086	0.19781	0.91793	0.7239	0.76345	0.96102	0.57568	0.92747	0.59704	0.1938	0.82987	2.1565e-05	0.00040829
Qkernel.CORE.4D	avgbs2_87598.1.37	0.351297	Mrg04	Chr6D	37.9	0.98454	0.59632	0.63626	0.96386	0.28242	0.77559	0.90419	1.1326e-11	0.18911	0.49982	0.53379	0.30634	3.1057e-11	0.23069	0.70479	0.0012	0.20136	0.58257	0.00903	0.06369	0.47179	0.00143	0.00754	0.08009	0.125	0.68295	0.37817	0.35106	0.0034	0.28078	0.03562	0.04581	0.46937	0.00845	0.11983	0.78833	0.02314	0.95675	0.5899	0.1115	0.21322	0.37705	4.4202e-07	0.86931
Qkernel.CORE.4D	avgbs_cluster_1498.1.50	0.38523	Mrg04	Chr6D	37.9	0.00127	0.8275	0.35248	0.01804	0.0037	0.00087565	0.00251	0.03144	0.92838	0.0001386	2.4888e-09	0.00304	0.01344	8.9493e-06	3.3472e-06	0.21664	0.02805	0.83593	0.36774	0.11518	0.02318	0.14007	0.10203	0.73755	0.99023	0.4034	0.02519	0.05762	0.17121	0.51224	0.13921	0.04819	0.01637	0.06889	0.26257	0.11863	0.87276	0.03654	0.60241	0.34917	0.15015	0.1413	0.09542	0.61635
Qkernel.CORE.4D	avgbs2_28921.1.16	0.273453	Mrg12	Chr7A	29.5	0.21201	0.74298	0.63702	0.99128	0.34249	0.1594	0.16776	2.8123e-07	0.31714	0.58719	0.78154	0.54611	2.9407e-07	0.084	0.43276	0.03485	0.97977	0.20648	0.00593	0.05424	0.04293	0.23072	0.06639	0.47516	0.34911	0.24845	0.08476	0.15142	0.2492	0.4428	0.02946	0.05456	0.08231	0.3114	0.59686	0.29487	0.27096	0.70189	0.3639	0.98052	0.14718	0.39389	5.9264e-09	0.51829
Qkernel.CORE.4D	avgbs_cluster_4977.1.16	0.297405	Mrg12	Chr7A	29.5	0.30256	0.86549	0.87392	0.80051	0.30706	0.19575	0.28276	1.7854e-07	0.31445	0.78112	0.72414	0.57744	2.0638e-07	0.07571	0.28617	0.03058	0.85938	0.17249	0.00494	0.05983	0.03973	0.22375	0.06896	0.4879	0.30161	0.17494	0.12068	0.16357	0.24417	0.30516	0.04003	0.06454	0.0906	0.3186	0.62505	0.29447	0.29718	0.57493	0.37512	0.94358	0.1595	0.42237	1.0471e-08	0.52326
Qkernel.CORE.4D	avgbs2_6837.1.39	0.0299401	Mrg12	Chr7A	40.9	0.32259	0.98303	0.12782	0.67954	0.88808	0.46972	0.85189	1.1951e-09	0.58108	0.7858	0.65552	0.94228	2.7397e-09	0.66535	0.40268	0.02513	0.65588	0.06206	0.08566	0.28341	0.0002186	0.01747	0.03291	0.7884	0.95134	0.06135	0.00928	0.18026	0.01953	0.1884	0.04113	0.06422	0.00131	0.01316	0.00391	0.01441	0.0007037	0.06742	0.15069	0.26631	0.00394	0.00737	6.5831e-06	0.75796
Qkernel.CORE.4D	avgbs_213813.1.24	0.0918164	Mrg12	Chr7A	63.5	0.00938	0.53938	0.03576	0.47872	0.23397	0.53743	0.8405	3.9562e-06	0.4904	0.06688	0.03794	0.23292	5.2361e-05	0.13205	0.15676	0.32699	0.68491	0.1939	0.74829	0.57562	0.00042711	0.31129	0.54109	0.47708	0.74585	0.23491	0.40189	0.90574	0.25472	0.05333	0.57666	0.31099	0.00576	0.42713	0.17833	0.14999	0.11633	0.14012	0.68857	0.67507	0.60913	0.06223	9.5553e-05	0.88394
Qkernel.CORE.4D	avgbs2_110114.1.63	0.115768	Mrg12	Chr7A	63.5	0.0011	0.71421	0.34892	0.07331	0.0009437	0.00991	0.00508	0.18339	0.25955	0.21189	0.02616	0.45892	0.17236	0.40836	0.02882	0.8731	0.1169	0.76191	0.71052	0.56779	0.54604	0.41478	0.43823	0.27584	0.84768	0.60649	0.2323	0.18334	0.74682	0.47401	0.42994	0.62693	0.29727	0.23867	0.87873	0.51405	0.37716	0.78617	0.86126	0.45993	0.86202	0.56106	0.01345	5.5201e-08
Qkernel.CORE.4D	avgbs2_197852.1.26	0.0319361	Mrg09	Chr7C	36.4	0.00166	0.36439	0.08795	0.02842	0.01126	0.01399	0.00334	0.01301	0.98704	0.00018771	3.5341e-08	0.00132	0.00457	2.0888e-05	1.6291e-06	0.39499	0.17908	0.94185	0.4607	0.30408	0.01198	0.21183	0.167	0.8973	0.64499	0.65126	0.06529	0.11682	0.19029	0.49554	0.08246	0.15133	0.00544	0.14123	0.35907	0.36711	0.58797	0.02498	0.81292	0.28181	0.42336	0.49765	0.05813	0.72604
Qkernel.CORE.4D	avgbs_cluster_26314.1.27	0.175649	Mrg09	Chr7C	43.4	0.25233	0.74602	0.32391	0.10763	0.27479	0.00688	0.0096	0.27052	0.46878	8.6909e-11	1.6602e-15	0.00096035	0.06007	2.9157e-05	1.6988e-10	0.03372	0.70172	0.2423	0.11295	0.04273	0.00015606	0.06864	0.11574	0.63311	0.77738	0.42652	0.04463	0.16496	0.0745	0.74063	0.34041	0.05843	0.00063755	0.06777	0.13793	0.92473	0.81378	0.35339	0.28369	0.00421	0.74363	0.18329	0.13043	0.67596
Qkernel.CORE.4D	avgbs_20124.1.22	0.105788	Mrg09	Chr7C	44.7	0.48912	0.71533	0.65916	0.71034	0.15386	0.91632	0.27459	4.4856e-09	0.43317	0.43738	0.94522	0.91296	1.6658e-08	0.86152	0.8053	0.02906	0.20897	0.06275	0.05745	0.28192	0.00012592	0.02592	0.03017	0.63812	0.42087	0.04747	0.03469	0.21847	0.01106	0.47227	0.08019	0.09511	0.00252	0.01487	0.00329	0.01636	0.00035378	0.03395	0.04474	0.57002	0.00306	0.01067	1.9705e-05	0.19936
Qkernel.CORE.4D	avgbs_cluster_3246.1.12	0.0459082	Mrg09	Chr7C	47.1	0.90867	0.50015	0.08611	0.45368	0.55267	0.33386	0.28158	0.29076	0.45398	0.41911	0.44512	0.25841	0.4278	0.14944	0.16145	7.7556e-05	0.63691	0.00015804	0.00032939	0.00029086	6.4997e-07	0.0023	0.00041809	0.13386	0.37039	0.00323	0.00016841	0.00119	0.00532	0.04016	0.01046	0.00030545	1.126e-05	0.0068	0.00088068	0.05502	0.03302	0.01372	0.00149	0.13921	0.00113	0.0049	0.55821	0.70305
Qkernel.CORE.4D	avgbs2_93080.1.13	0.215569	Mrg09	Chr7C	49.2	0.00755	0.46658	0.13097	0.09223	0.05776	0.03038	0.0026	0.08245	0.82549	0.00057526	9.3248e-07	0.00568	0.0276	4.2996e-05	1.2946e-05	0.01388	0.08711	0.08996	0.03062	0.01918	0.00376	0.01776	0.01435	0.95053	0.36307	0.14754	0.00666	0.04496	0.20885	0.56195	0.20583	0.02954	0.00265	0.01013	0.03788	0.03624	0.05105	0.01168	0.46575	0.15521	0.05871	0.13124	0.47092	0.46893
Qkernel.CORE.4D	avgbs_cluster_16831.1.12	0.0598802	Mrg09	Chr7C	50.9	0.02513	0.15312	0.2607	0.02979	0.02632	0.01895	0.00209	0.02624	0.85161	0.02438	3.2227e-07	0.00067961	0.02997	1.4083e-05	6.8972e-05	0.31376	0.49996	0.58142	0.51913	0.30434	0.00053447	0.15966	0.26253	0.85683	0.07416	0.42907	0.1741	0.15688	0.14687	0.02615	0.5917	0.13459	0.00091263	0.0797	0.3602	0.84574	0.6551	0.07905	0.4766	0.16249	0.95183	0.41285	0.17199	0.77886
Qkernel.CORE.4D	avgbs_74882.1.18	0.0818363	Mrg09	Chr7C	50.9	0.00535	0.5506	0.10055	0.12382	0.03567	0.00959	0.00193	0.00138	0.94126	5.158e-05	5.2836e-08	0.00101	0.00038498	1.6523e-05	6.7191e-07	0.00468	0.14726	0.01806	0.00597	0.00577	0.00020174	0.00791	0.00801	0.89497	0.84324	0.01583	0.00107	0.02189	0.04813	0.50377	0.0487	0.00549	0.00069183	0.01011	0.00991	0.18069	0.04	0.02015	0.1677	0.13962	0.0018	0.00647	0.01938	0.25523
Qkernel.CORE.4D	avgbs_cluster_20332.1.17	0.183633	Mrg09	Chr7C	50.9	0.00277	0.74873	0.16456	0.05224	0.054	0.02156	0.00144	0.03495	0.84343	8.4697e-05	1.0625e-07	0.00199	0.00852	3.4177e-05	1.3661e-06	0.26741	0.25468	0.66975	0.46488	0.27976	0.01451	0.08992	0.26834	0.96375	0.98923	0.47011	0.0754	0.29242	0.31971	0.98024	0.43953	0.21524	0.01726	0.06304	0.17488	0.15734	0.37777	0.11777	0.50255	0.03113	0.26502	0.34081	0.26372	0.50476
Qkernel.CORE.4D	avgbs_117384.1.38	0.0179641	Mrg09	Chr7C	73.5	0.17016	0.16505	0.03282	0.47292	0.4848	0.3986	0.32223	3.8608e-09	0.61156	0.27707	0.38186	0.68642	7.5866e-09	0.83047	0.58761	0.01933	0.63894	0.02895	0.01825	0.08408	0.0006439	0.02837	0.09215	0.79082	0.88339	0.01659	0.08965	0.50604	0.04571	0.30061	0.10198	0.14634	0.00844	0.02116	0.00499	0.01019	0.00029732	0.04764	0.06271	0.52308	0.00076015	0.00566	2.6773e-05	0.4928
Qkernel.CORE.4D	avgbs_cluster_33555.1.48	0.0858283	Mrg09	Chr7C	82.3	0.08979	0.4518	0.62251	0.55936	0.00015359	0.57221	0.42851	0.79458	6.4119e-05	0.43867	5.6069e-07	0.52941	0.59724	0.66771	0.50592	0.05793	0.41201	0.03909	0.19281	0.08009	0.28148	0.16801	0.09466	0.34351	0.1913	0.229	0.22043	0.07691	0.18285	0.10652	0.47495	0.10455	0.25378	0.36469	0.00209	0.57809	0.00944	0.017	0.04096	0.01018	0.04909	0.0237	0.67984	0.37273
Qkernel.CORE.4D	avgbs_cluster_40502.1.27	0.291417	Mrg09	Chr7C	91.9	0.08245	0.69404	0.61647	0.54113	7.1374e-05	0.90842	0.13384	1.7984e-07	4.6429e-05	0.80952	5.6754e-07	0.31095	1.2876e-06	0.33736	0.55263	0.00090334	0.06688	0.11704	0.01669	0.06599	0.68846	0.00179	0.00295	0.21217	0.02418	0.27962	0.06677	0.13535	0.00411	0.21165	0.02681	0.02214	0.83657	0.01025	0.0291	0.19928	0.00675	0.58366	0.21068	0.05451	0.24316	0.28534	3.289e-06	0.98308
Qkernel.CORE.4D	avgbs2_198198.1.27	0.291417	Mrg09	Chr7C	91.9	0.07458	0.8127	0.57553	0.44602	6.1061e-05	0.89148	0.20902	1.986e-07	4.3995e-05	0.769	1.1456e-06	0.50735	1.7208e-06	0.33742	0.55233	0.00090738	0.05277	0.09095	0.01555	0.0603	0.67766	0.00104	0.00265	0.18527	0.01564	0.23838	0.04452	0.12785	0.00334	0.16102	0.02691	0.01941	0.76705	0.00829	0.03493	0.16114	0.00333	0.61107	0.25539	0.05521	0.25934	0.27763	5.9728e-06	0.91693
Qkernel.CORE.4D	avgbs2_106614.1.61	0.0598802	Mrg02	Chr7D	27.4	0.32659	0.4107	0.38904	0.06944	0.34678	0.73137	0.40336	6.963e-09	0.77622	0.48667	0.2658	0.60195	1.8112e-08	0.45775	0.34385	0.00044768	0.39058	0.00077602	0.0019	0.02067	1.5852e-05	0.0031	0.0132	0.03108	0.17952	0.00949	0.04232	0.01294	0.03124	0.70107	0.01478	0.00639	0.00026069	0.00716	0.00309	0.69149	0.00695	0.09171	0.18829	0.44476	0.00885	0.00084444	0.00752	0.6061
Qkernel.CORE.4D	avgbs2_97000.1.48	0.0758483	Mrg02	Chr7D	27.4	0.98239	0.5671	0.99238	0.30567	0.84891	0.09279	0.69895	3.8065e-09	0.0402	0.49241	0.85479	0.28263	1.6596e-08	0.87003	0.74535	0.06286	0.53164	0.08258	0.14905	0.35577	0.00103	0.03451	0.09811	0.29382	0.78645	0.05116	0.08528	0.45753	0.0291	0.34891	0.14661	0.23023	0.01268	0.02401	0.00338	0.01341	0.0004177	0.01521	0.15726	0.36506	0.00422	0.00628	3.4247e-05	0.17009
Qkernel.CORE.4D	avgbs_105242.1.44	0.011976	Mrg02	Chr7D	67.4	0.19469	0.19308	0.0812	0.56778	0.09189	0.3381	0.30363	0.36933	0.11138	0.19824	0.2548	0.31635	0.46019	0.87124	0.35591	0.59842	0.76106	0.64153	0.73846	0.75444	0.79431	0.47836	0.78094	0.04409	0.44416	0.30994	0.8648	0.52499	0.17247	0.78291	0.89619	0.50959	0.84325	0.29254	0.87591	0.24166	0.36899	0.44912	0.59587	0.41132	0.72818	0.78299	0.02504	0.0176
Qkernel.CORE.4D	avgbs2_123707.1.19	0.0139721	Mrg02	Chr7D	76.7	0.00129	0.73278	0.07582	0.09677	0.00090827	0.00688	0.00502	0.57997	0.82484	0.90821	0.71963	0.48885	0.37302	0.63488	0.19628	0.85982	0.50505	0.94347	0.61139	0.33765	0.50019	0.47113	0.8519	0.7508	0.61171	0.73116	0.55407	0.59828	0.93681	0.36551	0.97588	0.94082	0.15716	0.40141	0.67358	0.6515	0.54212	0.1889	0.61635	0.43786	0.8677	0.59749	0.02937	4.9782e-08
Qkernel.CORE.4D	avgbs2_120215.1.44	0.0139721	Mrg02	Chr7D	85.2	0.82954	0.45252	0.97136	0.7726	0.53607	0.74224	0.9564	4.0087e-07	0.24334	0.99267	0.4236	0.22524	5.9802e-07	0.05178	0.36376	0.03294	0.69293	0.30969	0.08215	0.2059	0.06272	0.01353	0.06813	0.91574	0.31336	0.74601	0.54082	0.15368	0.02925	0.09298	0.17467	0.16561	0.08291	0.01186	0.07836	0.27288	0.13504	0.63997	0.36357	0.01401	0.27419	0.38954	0.00102	0.00039656
Qkernel.CORE.4D	avgbs_71975.1.58	0.0399202	Mrg02	Chr7D	85.2	0.03995	0.41669	0.0366	0.26036	0.25233	0.08744	0.23602	2.8998e-08	0.56999	0.93457	0.4061	0.89248	2.9739e-08	0.81804	0.22219	0.00245	0.19177	0.00161	0.00866	0.05149	1.2945e-05	0.00285	0.0487	0.01508	0.04747	0.01497	0.16026	0.09128	0.04519	0.48495	0.05601	0.05006	0.00019776	0.01192	0.00797	0.51996	0.01986	0.25369	0.14912	0.24333	0.01698	0.00239	0.0675	0.07872
Qkernel.CORE.4D	avgbs_cluster_44131.1.64	0.0518962	Mrg02	Chr7D	87.3	0.40461	0.44731	0.34336	0.84701	0.21887	0.53066	0.63306	1.3318e-10	0.47829	0.73974	0.56377	0.84729	9.6747e-10	0.19192	0.97277	0.00876	0.08076	0.02324	0.04394	0.12817	0.00011738	0.00241	0.01491	0.30366	0.13577	0.031	0.00376	0.19182	0.01813	0.12113	0.09574	0.05646	0.00333	0.00416	0.0021	0.01053	0.000151	0.0354	0.12927	0.51168	0.00193	0.00344	1.4649e-06	0.1611
Qkernel.CORE.4D	avgbs_200722.1.60	0.227545	Mrg02	Chr7D	87.3	0.81942	0.62312	0.72201	0.89934	0.66692	0.7203	0.43147	1.0439e-12	0.84982	0.67012	0.36298	0.53506	2.6457e-12	0.85834	0.70519	0.00277	0.52061	0.70982	0.01158	0.10773	0.65388	0.00248	0.00717	0.75937	0.14771	0.90472	0.31868	0.27764	0.00061169	0.22272	0.02895	0.07119	0.52681	0.01709	0.08021	0.86752	0.01374	0.83585	0.19961	0.06268	0.0549	0.34027	2.9395e-08	0.20262
Qkernel.CORE.4D	avgbs_92859.1.22	0.0638723	Mrg02	Chr7D	110.4	0.58376	0.33757	0.40758	0.20067	0.60514	0.21326	0.62513	0.38823	0.60979	0.9299	0.30451	0.85415	0.21225	0.35271	0.88853	0.55953	0.65152	0.60451	0.78204	0.94185	0.73767	0.29446	0.99904	0.02745	0.30218	0.24601	0.79665	0.4142	0.2235	0.79244	0.9496	0.94552	0.37668	0.32258	0.95043	0.1127	0.31242	0.15485	0.58284	0.35887	0.78301	0.92977	0.00305	0.02992
Qkernel.CORE.4D	avgbs_248034.1.37	0.00998004				0.0781	0.26819	0.67145	0.14338	0.71259	0.82691	0.75523	3.397e-07	0.00957	0.00052239	0.88179	0.04543	1.5531e-07	0.17804	0.62451	0.01594	0.26766	0.84119	0.00081947	0.01195	0.0359	0.06166	0.02858	0.93061	0.30879	0.87859	0.09077	0.00166	0.21109	0.03742	0.00615	0.01889	0.04978	0.07232	0.17867	0.15746	0.80536	0.54663	0.14585	0.81089	0.02983	0.06412	3.9431e-06	0.00184
Qkernel.CORE.4D	avgbs_cluster_23897.1.35	0.00998004				0.10781	0.64149	0.52727	0.11767	0.16607	0.82142	0.67037	9.1193e-07	0.57131	0.89194	0.42828	0.45765	2.6064e-06	0.27715	0.15357	0.1329	0.83219	0.45858	0.02635	0.3819	0.02763	0.15068	0.31979	0.89889	0.30756	0.35011	0.38428	0.42536	0.37741	0.5273	0.0336	0.366	0.01399	0.15474	0.72108	0.76754	0.83808	0.43544	0.80183	0.49539	0.18111	0.24029	1.2769e-05	0.26401
Qkernel.CORE.4D	avgbs_cluster_5459.1.48	0.00998004				0.63208	0.34814	0.74578	0.82528	0.152	0.00558	0.05958	8.4269e-05	0.38483	0.06875	0.0008765	0.01114	7.4044e-05	8.0127e-06	0.00612	0.00043069	0.46979	0.00263	0.00425	0.00237	3.1075e-08	8.2779e-05	0.00056325	0.76461	0.32169	0.00207	0.0006304	0.00133	0.01162	0.21411	0.00926	0.00070522	4.153e-07	7.9522e-05	0.00952	0.12247	0.24427	0.0076	0.41287	0.16883	0.01368	0.00424	0.00019638	0.26516
Qkernel.CORE.4D	avgbs2_50863.1.62	0.00998004				0.24707	0.38413	0.99114	0.76125	0.08166	0.00263	0.04347	0.00015681	0.61271	0.04702	0.0001863	0.02489	8.2288e-05	1.3412e-05	0.00142	0.00432	0.73469	0.02342	0.01883	0.00976	4.2956e-08	0.0004482	0.0059	0.6591	0.22913	0.01993	0.00354	0.00455	0.03805	0.48087	0.01511	0.00484	6.3719e-07	0.00033363	0.09993	0.09121	0.64867	0.02598	0.58208	0.4699	0.07739	0.01198	9.6185e-05	0.146
Qkernel.CORE.4D	avgbs_232079	0.011976				0.45299	0.36335	0.4213	0.76405	0.03282	0.06193	0.00753	3.0869e-09	0.31391	0.00217	0.01682	0.61771	1.2801e-08	0.00697	0.02376	0.00223	0.10403	0.2579	0.00764	0.01305	3.0146e-09	9.7712e-05	0.0072	0.37883	0.61239	0.13573	0.00304	0.07316	0.02256	0.673	0.00729	0.02826	1.6688e-06	0.00085732	0.00097936	0.29142	0.08709	0.00179	0.12341	0.25012	0.00229	0.0106	2.6844e-05	0.43371
Qkernel.CORE.4D	avgbs_245926.1.40	0.011976				0.36809	0.83433	0.4608	0.84212	0.46926	0.30101	0.46245	5.0381e-13	0.22052	1.2409e-06	3.4922e-09	0.78595	4.2411e-13	0.56872	1.188e-05	0.0505	0.67369	0.64301	0.00711	0.05602	0.05179	0.07787	0.13903	0.46995	0.22624	0.75579	0.35159	0.04772	0.40039	0.24714	0.03831	0.09968	0.07501	0.09793	0.49355	0.21083	0.75679	0.97398	0.68529	0.16503	0.19369	0.34791	2.6476e-12	0.19293
Qkernel.CORE.4D	avgbs_62003.1.61	0.011976				0.23221	0.64229	0.65372	0.44138	0.03486	0.27694	0.71379	1.5857e-10	5.9332e-05	0.00198	1.6191e-05	0.70974	1.9519e-10	0.05972	0.4817	0.04025	0.32782	0.04063	0.0343	0.31308	0.00012697	0.02791	0.07628	0.64962	0.79901	0.03479	0.07026	0.94831	0.02401	0.91938	0.00603	0.17267	0.00442	0.01973	0.00332	0.00908	0.00043728	0.03756	0.169	0.0953	0.00047378	0.00346	3.6889e-06	0.17869
Qkernel.CORE.4D	avgbs_81812.1.12	0.011976				0.80832	0.65789	0.95988	0.9807	0.55738	0.28923	0.50634	2.8643e-08	0.09423	0.14698	0.34421	NaN	1.5618e-06	0.07249	0.1053	0.01358	0.2243	0.48661	0.00422	0.00796	0.00989	0.05647	0.04179	0.45424	0.44086	0.17948	0.07097	0.00927	0.25912	0.52767	0.02648	0.00656	0.03125	0.18505	0.16641	0.49015	0.4439	0.37391	0.57071	0.51619	0.10997	0.15808	1.5917e-06	0.11613
Qkernel.CORE.4D	avgbs_cluster_11483.1.14	0.011976				0.0162	0.05545	0.18212	0.05309	0.00721	0.5913	0.96299	0.79072	0.13935	0.04567	0.18464	0.57734	0.80777	0.10827	0.51609	0.15972	0.00817	0.02793	0.82225	0.07157	0.06835	0.08745	0.08	0.47282	0.09399	0.056	0.04211	0.23053	0.12411	0.56792	0.63662	0.03606	0.04014	0.0896	0.02365	0.66322	0.15246	0.31947	0.15354	0.16242	0.38783	0.07338	0.40456	0.05147
Qkernel.CORE.4D	avgbs_cluster_29440.1.36	0.011976				0.00118	0.66146	0.33972	0.0358	0.00055085	0.00813	0.00534	0.65216	0.12676	0.84948	0.54064	0.57989	0.26717	0.12864	0.33915	0.73898	0.73347	0.33024	0.83332	0.54018	0.88749	0.62532	0.8506	0.81828	0.96146	0.71488	0.98194	0.22984	0.96934	0.53433	0.98803	0.96299	0.60279	0.3311	0.96223	0.42753	0.21204	0.86974	0.16133	0.50168	0.70416	0.29301	0.00491	1.2717e-07
Qkernel.CORE.4D	avgbs_cluster_36148.1.7	0.011976				0.00194	0.62495	0.42188	0.10626	0.00126	0.0126	0.00567	0.6453	0.62106	0.84	0.31528	0.41037	0.38042	0.07322	0.2933	0.52512	0.11736	0.94188	0.26478	0.22698	0.16143	0.14674	0.40767	0.98723	0.90061	0.76391	0.40841	0.32589	0.69908	0.50476	0.41739	0.27441	0.30233	0.06835	0.17251	0.59096	0.34362	0.0416	0.95998	0.07125	0.48292	0.29269	0.00154	2.9226e-11
Qkernel.CORE.4D	avgbs_cluster_41015.1.32	0.011976				0.60119	0.08581	0.78244	0.45471	0.58564	0.71791	0.00088512	2.0678e-14	0.5979	0.8586	0.28665	0.40597	7.6298e-14	0.41003	0.90304	0.0045	0.98137	0.05037	0.00063087	0.04189	1.8013e-05	0.00288	0.00168	0.5055	0.40714	0.04981	0.00116	0.02282	0.00037651	0.02025	0.00096235	0.01691	0.00030902	0.01632	0.00058304	0.19115	0.07532	0.0032	0.21349	0.30812	0.00013603	0.00269	8.1893e-05	0.44219
Qkernel.CORE.4D	avgbs_32635.1.21	0.0139721				0.38545	0.95082	0.25109	0.83323	0.31054	NaN	0.71097	9.1609e-25	0.56859	0.98628	1.5065e-09	0.00131	6.0384e-23	NaN	3.7359e-06	2.359e-08	0.27988	2.0983e-06	1.171e-09	6.5952e-07	4.4954e-08	1.2617e-05	1.1166e-08	0.60467	0.32536	4.7468e-07	2.4589e-05	4.5496e-07	1.3665e-07	0.22201	7.692e-09	1.0428e-08	2.2786e-06	3.6704e-05	8.9234e-06	0.29085	0.00016847	0.0235	0.00159	0.50552	1.0889e-06	5.423e-06	2.1527e-12	0.0086
Qkernel.CORE.4D	avgbs_49834.1.29	0.0139721				0.03289	0.37447	0.03877	0.20528	0.39603	0.68891	0.32082	0.01295	0.44659	0.02506	0.00364	0.94863	0.00698	0.45889	0.28834	0.97052	0.3863	0.19005	0.64302	0.76435	0.02476	0.87715	0.89141	0.41578	0.46928	0.68918	0.95941	0.39211	0.21803	0.75145	0.74186	0.73388	0.04565	0.80702	0.74331	0.7494	0.60659	0.77811	0.66691	0.5716	0.25764	0.94503	2.7972e-05	0.40869
Qkernel.CORE.4D	avgbs_cluster_2279.1.25	0.0139721				0.56898	0.25684	0.33359	0.88975	0.12553	NaN	0.36721	4.0818e-29	0.99527	0.72206	0.01214	0.00337	2.2877e-27	NaN	0.22294	2.8657e-06	0.67237	0.00011454	1.4618e-07	2.738e-05	6.6721e-11	2.134e-05	2.3947e-06	0.92088	0.50707	4.1362e-05	0.00029233	0.00028221	2.8724e-06	0.24266	2.3588e-07	1.9755e-06	1.9779e-08	2.8709e-05	3.5253e-06	0.03695	2.8761e-05	0.00544	0.00168	0.499	7.9149e-07	4.9172e-07	4.0952e-14	0.00615
Qkernel.CORE.4D	avgbs_cluster_24885.1.26	0.0139721				0.34848	0.99732	0.38329	0.94829	0.17026	NaN	0.91587	3.7491e-26	0.59988	0.65253	7.1623e-10	0.00294	2.3708e-24	NaN	2.6441e-06	3.5445e-09	0.8521	2.8039e-09	2.2758e-09	9.571e-07	2.0466e-08	4.1484e-07	1.6579e-08	0.66082	0.48236	1.0062e-08	2.1474e-05	2.9833e-07	3.1147e-07	0.14644	2.0005e-08	1.7265e-08	1.0864e-06	7.5008e-07	5.716e-08	0.08415	5.391e-07	0.00218	0.00057448	0.09146	1.979e-08	8.1299e-09	9.6754e-13	0.02781
Qkernel.CORE.4D	avgbs_cluster_37941.1.64	0.0139721				0.36346	0.45025	0.15132	0.908	0.4499	0.38831	0.48947	0.63643	0.00792	6.8783e-07	1.3893e-08	0.44084	0.96093	0.40615	6.4766e-05	0.34545	0.79058	0.03908	0.46002	0.81115	0.38052	0.49163	0.88557	0.49278	0.98942	0.25213	0.88814	0.94514	0.55727	0.65105	0.82781	0.8899	0.52499	0.56315	0.30242	0.19039	0.7956	0.44691	0.13129	0.03099	0.15714	0.41578	0.85035	0.0413
Qkernel.CORE.4D	avgbs_cluster_51941.1.6	0.0139721				0.69538	0.27662	0.59448	0.97738	0.02174	0.49401	0.45114	2.2703e-07	0.16221	0.16939	0.02583	0.22195	2.9626e-07	0.32126	0.0109	0.00158	0.52309	0.01031	0.00111	0.08878	0.00882	0.00484	0.01014	0.17863	0.17799	0.02417	0.00726	0.34923	0.03656	0.08191	0.02544	0.06991	0.05441	0.01711	0.00089063	0.00264	0.00024004	0.00274	0.20071	0.61673	0.00064982	0.00042327	0.00032941	0.00666
Qkernel.CORE.4D	avgbs_cluster_55698.1.60	0.0139721				0.75495	0.59884	0.11225	0.39461	0.53067	0.50189	0.78805	7.7017e-10	0.6229	0.45269	0.77457	0.86652	2.4256e-09	0.05745	0.11233	0.00081669	0.12041	0.00105	0.00386	0.03092	7.1087e-07	0.00627	0.01089	0.02307	0.09673	0.00855	0.03768	0.03581	0.0041	0.81057	0.02051	0.01874	7.0408e-05	0.01447	0.00047737	0.42718	0.00063643	0.02546	0.05077	0.41547	0.00233	0.00043299	0.00176	0.64918
Qkernel.CORE.4D	avgbs2_46636.1.9	0.0139721				0.24419	0.37562	0.12843	0.672	0.14796	NaN	0.57664	2.3605e-05	0.02396	0.66309	0.96603	0.0846	2.8609e-05	NaN	0.15192	0.12236	0.81649	0.40276	0.01866	0.20135	3.3814e-06	0.22408	0.14273	0.38128	0.44554	0.47669	0.21782	0.74544	0.00585	0.99832	0.01203	0.06565	5.8599e-05	0.20889	0.01885	0.51686	0.02468	0.18906	0.04889	0.28739	0.00481	0.02214	0.00075166	0.10605
Qkernel.CORE.4D	avgbs_27922.1.15	0.0159681				0.46386	0.35309	0.86179	0.95204	0.33507	0.1012	0.96335	4.4035e-05	0.00011182	0.00297	0.63661	0.00615	0.00029363	0.89499	0.58561	0.01592	0.11821	0.4592	0.00142	0.19043	0.02102	0.05155	0.00738	0.64585	0.41658	0.29364	0.01711	0.19008	0.00482	0.09257	0.00027419	0.02603	0.04036	0.05981	0.0788	0.16762	0.02183	0.74683	0.51522	0.55598	0.00405	0.0849	0.00409	0.00066244
Qkernel.CORE.4D	avgbs_cluster_13779.1.48	0.0159681				0.31034	0.914	0.36882	0.82577	0.1394	NaN	0.70061	6.5629e-33	0.41262	0.81835	3.5681e-10	0.00081878	5.4307e-30	NaN	7.5342e-06	1.239e-10	0.43777	7.1048e-09	4.3291e-11	3.4762e-08	6.1894e-12	2.5795e-08	1.0721e-10	0.63003	0.13739	5.1002e-09	9.9012e-07	3.1599e-07	4.4561e-09	0.22956	3.4146e-10	7.6412e-10	1.6878e-08	3.3997e-07	1.9944e-08	0.02326	6.1125e-08	0.0013	0.0001887	0.36594	1.2358e-09	2.5905e-09	1.3756e-14	0.00839
Qkernel.CORE.4D	avgbs2_104391.1.41	0.0159681				0.17721	0.56503	0.9373	0.71013	0.56721	0.79178	0.99539	5.6669e-09	0.50003	0.11314	0.26369	0.50078	1.3282e-08	0.74232	0.98243	0.03717	0.00512	0.24302	0.04538	0.15292	8.2347e-07	0.01318	0.05694	0.34213	0.06877	0.15909	0.01507	0.16498	0.03556	0.29238	0.27017	0.10137	4.3454e-05	0.01651	0.00836	0.01488	0.13263	0.14369	0.51002	0.02732	0.01012	0.05769	0.01555	0.21894
Qkernel.CORE.4D	avgbs2_41210.1.43	0.0159681				0.9255	0.93331	0.35674	0.5003	0.69013	0.32208	0.99496	3.8716e-06	0.95285	0.26787	0.87284	0.15495	5.3544e-07	0.23838	0.05303	0.00678	0.33671	0.00046323	0.00717	0.03713	0.00272	0.02927	0.02831	0.12934	0.8578	0.00122	0.72665	0.04754	0.01263	0.53082	0.00464	0.032	0.00645	0.04062	0.00063237	0.45625	0.00015711	0.02236	0.00565	0.37518	0.0123	0.00015004	0.00407	0.27942
Qkernel.CORE.4D	avgbs_106614.1.13	0.0179641				0.44639	0.91073	0.527	0.09988	0.2468	0.91509	0.85537	4.3726e-36	0.63325	0.51725	6.8168e-10	0.00414	7.3101e-34	0.24431	7.1132e-06	1.108e-09	0.59241	2.1041e-06	4.2162e-11	7.5317e-07	3.6976e-12	5.7988e-07	1.3399e-09	0.79382	0.46078	8.4979e-07	7.4567e-06	3.0048e-06	4.1711e-08	0.44902	4.2482e-10	7.8543e-09	5.6714e-09	2.1846e-06	1.4713e-06	0.0901	3.438e-06	0.02669	0.00208	0.62088	2.9126e-08	2.5816e-07	1.1576e-19	0.03007
Qkernel.CORE.4D	avgbs_319125.1.56	0.0179641				0.8136	0.38161	0.53844	0.96974	0.53598	0.80214	0.29443	3.1124e-09	0.89022	0.00057011	0.00287	0.76157	2.831e-09	0.30154	0.09736	0.08372	0.33618	0.10418	0.03011	0.13359	0.16755	0.10026	0.14615	0.83867	0.50694	0.18267	0.11502	0.04276	0.37772	0.95208	0.00944	0.16805	0.24641	0.15084	0.26393	0.85829	0.4272	0.45836	0.29952	0.75826	0.0679	0.1456	1.5241e-08	0.41972
Qkernel.CORE.4D	avgbs_475559.1.21	0.0179641				0.30501	0.2781	0.2288	0.23545	0.64701	0.01112	0.84299	0.00033373	0.80439	0.22549	1.9696e-09	0.08892	0.00265	0.33385	5.8744e-06	1.9654e-05	0.75643	1.0074e-07	3.1262e-05	0.00103	0.16898	0.01708	2.426e-06	0.22346	0.04233	1.6761e-06	0.00054105	1.9984e-05	0.00052386	0.46466	2.848e-05	9.8277e-05	0.22513	0.03176	0.00525	0.48922	0.0002492	0.20109	0.15076	0.30982	0.00069328	0.01961	0.07972	0.84932
Qkernel.CORE.4D	avgbs_cluster_564.1.33	0.0179641				0.5931	0.75107	0.64562	0.65865	0.61537	0.73877	0.78824	0.85387	0.03173	0.14921	0.52076	0.90603	0.91244	0.90562	0.1091	0.44428	0.63324	0.3228	0.25296	0.88234	0.47534	0.40209	0.99537	0.01711	0.4545	0.17402	0.89141	0.58441	0.21211	0.83217	0.71132	0.96224	0.67717	0.4092	0.59213	0.13957	0.05504	0.4008	0.35183	0.65526	0.6811	0.5259	0.02544	0.0061
Qkernel.CORE.4D	avgbs2_197563.2.57	0.0179641				0.12653	0.52554	0.13435	0.128	0.681	0.76365	0.17584	5.4541e-05	0.63065	0.00362	0.0554	0.88727	1.8239e-05	0.29728	0.17948	0.35766	0.81173	0.65112	0.27708	0.22093	0.03997	0.34771	0.30238	0.02691	0.314	0.38209	0.01372	0.22137	0.34882	0.07344	0.22137	0.02542	0.04162	0.35235	0.66598	0.60902	0.94504	0.45437	0.25991	0.77574	0.1403	0.21412	1.2042e-05	0.33464
Qkernel.CORE.4D	avgbs2_24950.1.34	0.0179641				0.00314	0.75225	0.46118	0.0788	0.00381	0.02661	0.0024	0.03739	0.13385	0.00039011	2.1628e-09	0.00155	0.00701	3.5433e-05	2.9945e-06	0.30965	0.28658	0.29084	0.53854	0.19267	0.03947	0.22599	0.1293	0.83148	0.61618	0.33474	0.02329	0.05576	0.19679	0.28515	0.23436	0.17364	0.03101	0.14154	0.0468	0.55779	0.10373	0.02446	0.40001	0.10782	0.18996	0.09577	0.4627	0.97419
Qkernel.CORE.4D	avgbs2_74051.1.7	0.0179641				0.24381	0.77429	0.02844	0.30178	0.55405	0.7424	0.73746	1.0334e-08	0.96638	0.45158	0.1925	0.28985	4.8757e-08	0.70189	0.44077	0.00531	0.54856	0.02571	0.01068	0.06282	0.00111	0.00719	0.03976	0.33236	0.14518	0.05657	0.01019	0.3175	0.01534	0.85169	0.0411	0.09636	0.01391	0.02008	0.00374	0.00773	0.00034708	0.03603	0.17472	0.52329	0.00269	0.00462	3.9136e-05	0.5714
Qkernel.CORE.4D	avgbs_cluster_12662.1.37	0.0199601				0.8399	0.74609	0.63954	0.40408	0.65129	0.67059	0.74697	0.25682	0.67312	0.94461	0.34336	0.93337	0.62253	0.93479	0.83616	0.83957	0.75889	0.48356	0.83062	0.91733	0.10174	0.72772	0.75027	0.01306	0.1761	0.08453	0.33886	0.31801	0.06762	0.06919	0.9704	0.48059	0.16882	0.44324	0.3257	0.25821	0.16911	0.18809	0.26588	0.02501	0.79982	0.94415	0.02601	0.00875
Qkernel.CORE.4D	avgbs_cluster_21294.1.29	0.0199601				0.97917	0.67026	0.88921	0.47215	0.36999	0.06563	0.2878	1.8975e-08	0.42948	0.20625	0.97998	0.94836	4.6735e-08	0.95479	0.40184	0.0064	0.16458	0.00668	0.01208	0.13212	9.5451e-05	0.00204	0.00471	0.00625	0.07444	0.00788	0.00745	0.05377	0.01378	0.03654	0.01056	0.05082	0.00259	0.00060921	0.00012466	0.00967	1.3986e-05	0.01802	0.02526	0.49375	3.3893e-05	3.2113e-05	0.00016331	0.59052
Qkernel.CORE.4D	avgbs_227999.1.64	0.0219561				0.53014	0.36725	0.44742	0.47913	0.66933	0.62096	0.22288	7.7471e-23	0.76255	0.9078	8.6067e-05	0.25084	1.3667e-21	0.32096	0.00818	9.9937e-07	0.90842	0.00023863	2.3065e-08	1.3357e-05	7.8472e-06	0.00020847	4.4012e-07	0.4803	0.17699	0.00025874	8.584e-05	2.7936e-05	9.4928e-06	0.29569	5.1976e-08	1.0025e-07	0.00059981	0.00079958	4.7973e-06	0.03891	1.2589e-05	0.00262	0.00687	0.15275	1.685e-05	2.6895e-06	1.168e-10	0.0196
Qkernel.CORE.4D	avgbs_309215.1.49	0.0219561				0.27665	0.16907	0.21354	0.99793	0.50641	0.23808	0.26896	6.71e-11	0.37603	0.02166	0.22904	0.2504	2.5729e-10	0.83017	0.11874	5.8723e-05	0.62254	0.00012324	0.00020289	0.00409	2.3095e-07	0.00051189	0.00161	0.03314	0.18956	0.00159	0.00719	0.00374	0.00689	0.94816	0.00142	0.00237	2.5277e-05	0.00334	0.00033395	0.6454	0.0016	0.05723	0.05908	0.36067	0.00052484	3.1101e-05	0.00475	0.63854
Qkernel.CORE.4D	avgbs_93562.1.21	0.0219561				0.79996	0.81142	0.87	0.31026	0.57569	0.93535	0.54708	0.01356	0.62767	0.1189	0.26296	0.10555	0.02389	0.54979	0.09954	0.38717	0.9726	0.74911	0.52388	0.43972	0.92436	0.58652	0.90324	0.38806	0.77445	0.8805	0.55246	0.22065	0.81665	0.5329	0.81188	0.60033	0.97736	0.97302	0.36719	0.41542	0.62912	0.13587	0.63783	0.1133	0.40161	0.81938	3.6834e-05	0.00047766
Qkernel.CORE.4D	avgbs_cluster_24885.1.49	0.0219561				0.86437	0.86626	0.10103	0.23394	0.40742	0.02492	0.57691	5.7367e-19	0.41336	0.17446	0.00096337	0.3062	1.4598e-18	0.26424	0.05066	7.5466e-08	0.78709	2.1788e-06	1.2634e-08	2.9631e-06	2.1752e-06	5.6237e-05	7.0075e-07	0.13186	0.35174	1.0502e-05	0.00012201	6.115e-05	4.5488e-06	0.2266	9.8429e-08	5.8274e-07	2.2585e-05	0.00030955	2.029e-06	0.16017	3.3211e-06	0.01556	0.00014165	0.48252	3.7516e-06	5.7642e-07	7.6058e-10	0.16777
Qkernel.CORE.4D	avgbs_cluster_3138.1.19	0.0219561				0.10348	0.06829	0.81696	0.30471	0.9316	0.07219	0.95828	1.5687e-12	0.25652	0.03027	0.1573	0.76494	4.1629e-12	0.65973	0.80156	0.00195	0.22949	0.98447	0.01655	0.12107	0.1638	0.00236	0.00565	0.36089	0.00246	0.67577	0.43016	0.10519	0.00218	0.20683	0.04072	0.04291	0.05741	0.01958	0.09185	0.28012	0.02605	0.8127	0.26827	0.11367	0.20958	0.44373	8.4076e-08	0.95361
Qkernel.CORE.4D	avgbs2_93801.1.6	0.0219561				0.10201	0.57767	0.49866	0.77146	0.25643	0.19909	0.24668	7.011e-05	0.00612	0.00761	9.3992e-08	0.30429	1.5501e-05	0.48288	9.8403e-06	0.00389	0.62332	0.04468	0.00158	0.00749	0.15712	0.02449	0.00177	0.60594	0.01567	0.02835	0.01626	0.0013	0.04547	0.07152	0.01961	0.00228	0.10536	0.03563	0.42043	0.33004	0.15059	0.62221	0.13931	0.97083	0.06341	0.39161	0.00034714	0.72882
Qkernel.CORE.4D	avgbs_46519.1.14	0.0239521				0.54623	0.92115	0.11914	0.85834	0.82467	0.25035	0.58086	7.2117e-08	0.39707	0.47772	0.4187	0.80457	2.4386e-07	0.85658	0.48791	0.00764	0.44993	0.34944	0.04978	0.08126	0.20336	0.00563	0.00793	0.27556	0.17277	0.44137	0.31729	0.24042	0.00055437	0.19447	0.03178	0.0355	0.08717	0.01489	0.13033	0.02902	0.00726	0.47155	0.10218	0.75728	0.15904	0.24349	0.00074158	0.19481
Qkernel.CORE.4D	avgbs_35864.1.56	0.0259481				0.19023	0.39634	0.57822	0.12027	0.2864	0.38107	0.39133	2.4949e-12	0.21699	0.98605	0.30091	0.33282	7.388e-12	0.35036	0.87909	0.00090129	0.39125	0.56425	0.01007	0.0618	0.54489	0.00192	0.00171	0.13763	0.38364	0.33546	0.15297	0.06306	0.00093973	0.06467	0.02896	0.00768	0.46478	0.01857	0.03026	0.45128	0.01227	0.55456	0.36753	0.0835	0.0688	0.13309	8.386e-08	0.48556
Qkernel.CORE.4D	avgbs_76423.1.56	0.0259481				0.97378	0.37446	0.27102	0.68969	0.41108	0.09322	0.38283	1.6668e-24	0.53204	0.09325	0.00936	0.61821	7.1054e-24	0.0509	0.19439	1.7608e-05	0.51737	0.00029208	6.1742e-06	0.00134	6.0499e-08	0.00029321	3.6648e-05	0.62538	0.40719	0.00012646	0.00329	0.00255	8.1326e-06	0.93786	3.1003e-05	0.00031663	3.9853e-06	0.00037347	6.5387e-05	0.00315	8.2595e-06	0.02061	0.00207	0.70921	1.4538e-05	1.4503e-05	6.2304e-15	0.07616
Qkernel.CORE.4D	avgbs_cluster_35534.1.21	0.0259481				0.06454	0.14193	0.36989	0.68076	0.00295	0.38573	0.00791	1.8872e-08	0.69856	0.1467	0.19772	0.75638	7.3174e-08	0.83484	0.83194	0.00078557	0.05793	0.00242	0.00056362	0.02424	3.4826e-06	0.01151	0.00708	0.01904	0.20347	0.01209	0.03501	0.00799	0.00545	0.98434	0.00853	0.01495	9.6434e-05	0.02493	0.00065533	0.08467	0.00521	0.12475	0.03431	0.0627	0.00081874	0.0001144	0.01664	0.33201
Qkernel.CORE.4D	avgbs_cluster_40856.1.28	0.0259481				0.02438	0.04249	0.58676	0.04166	0.02489	0.03773	0.23424	3.6549e-07	7.6398e-07	0.07203	0.45917	0.00483	2.0549e-06	0.02407	0.82196	0.00149	0.81996	0.00577	0.00405	0.02686	1.4882e-06	0.00076934	0.00179	0.31157	0.84788	0.00478	0.00284	0.0049	0.0209	0.68095	0.00756	0.00497	4.0867e-05	0.00176	0.00408	0.639	0.03651	0.00277	0.4322	0.03971	0.02518	0.13413	9.8723e-05	0.05833
Qkernel.CORE.4D	avgbs2_45754.1.56	0.0259481				0.83282	0.73653	0.54624	0.96541	0.19736	0.6469	0.28825	1.9141e-16	0.15352	0.80444	0.00339	0.01055	5.3279e-16	0.67632	0.04372	0.00015521	0.74957	5.8244e-05	9.5824e-05	0.0015	1.938e-05	0.00395	0.00014955	0.73137	0.65004	2.3834e-05	0.01666	0.00244	5.6109e-05	0.62809	0.00045668	0.0003224	0.00016084	0.00439	6.0412e-05	0.13536	4.2567e-05	0.03876	0.00134	0.78212	3.687e-05	5.0156e-05	6.8562e-10	0.15837
Qkernel.CORE.4D	avgbs2_167941.1.18	0.0279441				0.4099	0.50623	0.56111	0.87814	0.13762	0.02937	0.43172	1.1445e-17	0.58312	0.59394	0.00257	0.00296	5.2602e-18	0.49455	0.0985	0.00021531	0.92793	0.000607	0.00017433	0.01533	8.0033e-06	0.00179	8.7599e-05	0.65426	0.12459	0.00040187	0.00911	0.00225	0.000249	0.36634	0.00037377	0.00137	2.4819e-05	0.00097452	0.00020834	0.06432	4.1149e-05	0.00486	0.00732	0.9805	0.00010369	0.00144	1.0586e-13	0.00422
Qkernel.CORE.4D	avgbs_28699.1.57	0.0299401				0.461	0.41891	0.61399	0.16375	0.942	0.32143	0.29555	1.0282e-08	0.86676	0.13776	0.91122	0.59131	5.0182e-08	0.50364	0.69721	0.00395	0.65936	0.00467	0.00069054	0.02666	0.00408	0.01129	0.05228	0.75186	0.63069	0.09811	0.11889	0.08341	0.06709	0.50928	0.00591	0.01582	0.00625	0.01531	0.32914	0.31925	0.2023	0.57423	0.41284	0.81456	0.04993	0.04194	2.7688e-06	0.75205
Qkernel.CORE.4D	avgbs_cluster_29547.1.25	0.0299401				0.64645	0.28612	0.6566	0.54242	0.70493	0.99314	0.44249	0.88636	0.42412	0.82728	0.38593	0.46367	0.879	0.35656	0.87095	0.02682	0.67954	0.04314	0.24627	0.08166	0.30961	0.00541	0.02084	0.01124	0.20525	0.05823	0.0015	0.09655	0.00262	0.08501	0.54404	0.11253	0.45943	0.03788	0.25971	0.25276	0.47087	0.22204	0.08999	0.69864	0.37851	0.79055	0.04718	0.00476
Qkernel.CORE.4D	avgbs_68727.1.18	0.0319361				0.54419	0.60538	0.53664	0.92479	0.36626	0.30291	0.85975	1.282e-13	0.81903	0.73457	0.87401	0.98363	5.4904e-13	0.04748	0.57936	0.00034235	0.48462	0.03864	0.00504	0.01756	0.7052	0.00044675	0.00097834	0.83393	0.09595	0.05224	0.12968	0.02605	0.00081493	0.21627	0.00841	0.02669	0.88155	0.00475	0.03297	0.5955	0.00051574	0.91446	0.42315	0.09663	0.06631	0.11661	5.8317e-08	0.26468
Qkernel.CORE.4D	avgbs_70949.1.45	0.0339321				0.00149	0.51788	0.34222	0.02864	0.00261	0.01414	0.00319	0.00192	0.63759	0.00022031	3.1078e-08	0.00024334	0.00046327	2.7501e-05	4.1164e-07	0.11818	0.13641	0.27275	0.20893	0.04738	0.00136	0.10808	0.02482	0.95409	0.18586	0.09475	0.02033	0.01441	0.04007	0.02985	0.20888	0.00711	0.00194	0.06249	0.02841	0.33846	0.08736	0.03353	0.0412	0.17252	0.03409	0.02318	0.11092	0.92061
Qkernel.CORE.4D	avgbs_cluster_6222.1.60	0.0339321				0.80351	0.01165	0.93931	0.25451	0.46958	0.03356	0.35726	1.7758e-07	0.82565	0.31003	0.51094	0.90808	1.492e-07	0.8602	0.27958	0.05067	0.97879	0.32345	0.01438	0.14536	0.01842	0.30619	0.1457	0.2802	0.6134	0.57552	0.1867	0.20136	0.32292	0.73385	0.05974	0.09704	0.02827	0.31923	0.68246	0.31607	0.26432	0.76742	0.77785	0.84994	0.19243	0.5244	1.8081e-09	0.82063
Qkernel.CORE.4D	avgbs2_134006.1.28	0.0339321				0.83748	0.16432	0.17952	0.47743	0.31456	0.77751	0.44921	1.068e-09	0.95964	0.09474	0.81857	0.73874	5.2796e-09	0.43942	0.43342	0.01168	0.1725	0.02582	0.01933	0.20473	0.00023895	0.009	0.04386	0.08054	0.90275	0.04257	0.06572	0.316	0.02062	0.73329	0.02185	0.11943	0.00576	0.00947	0.00398	0.00446	0.00052723	0.03022	0.15808	0.10484	0.00314	0.00531	9.239e-06	0.05959
Qkernel.CORE.4D	avgbs2_134612.1.26	0.0339321				0.67775	0.02721	0.61543	0.47028	0.55089	0.34662	0.29879	1.4892e-07	0.0345	0.08736	0.18726	0.06048	9.4121e-07	0.32528	0.98856	0.08885	0.59736	0.17434	0.2574	0.54086	0.00715	0.11182	0.13915	0.44091	0.82551	0.03849	0.08542	0.65077	0.09096	0.78518	0.04544	0.49885	0.0179	0.1387	0.02657	0.09088	0.00586	0.06534	0.54114	0.07746	0.08562	0.02425	4.8447e-05	0.42747
Qkernel.CORE.4D	avgbs2_196064.1.38	0.0339321				0.00183	0.744	0.39033	0.06363	0.01959	0.00689	0.00143	0.06504	0.62346	0.00034629	6.4402e-08	0.003	0.03452	5.2059e-05	2.0984e-06	0.04985	0.22544	0.21351	0.20364	0.06852	0.00020528	0.05732	0.026	0.56787	0.97106	0.02267	0.00426	0.06364	0.04887	0.75634	0.294	0.01993	0.00011486	0.02673	0.00899	0.12282	0.09499	0.02505	0.04189	0.08995	0.03986	0.05614	0.52836	0.95141
Qkernel.CORE.4D	avgbs_cluster_40594.1.20	0.0379242				0.1742	0.01002	0.87419	0.38586	0.5371	0.38479	0.7923	0.58882	0.21918	2.0604e-07	1.6088e-08	0.45072	0.65118	0.55383	7.3334e-05	0.38134	0.80677	0.86397	0.39242	0.758	0.24167	0.75736	0.71595	0.13238	0.2472	0.36951	0.76483	0.95866	0.41378	0.95053	0.73801	0.75825	0.32334	0.80506	0.47708	0.17272	0.42373	0.91811	0.19587	0.01453	0.61776	0.46675	0.84086	0.02946
Qkernel.CORE.4D	avgbs2_134612.1.42	0.0379242				0.79038	0.83004	0.17814	0.96353	0.0818	0.47352	0.92254	3.1992e-10	0.43631	0.45076	0.1261	0.94589	2.659e-09	0.44735	0.21103	0.02331	0.04019	0.05261	0.05154	0.23308	0.00024255	0.0123	0.04688	0.72633	0.65061	0.04753	0.0444	0.96403	0.01442	0.3485	0.03729	0.10411	0.00531	0.00451	0.00226	0.01267	0.00047014	0.04016	0.10842	0.32727	0.00228	0.00378	6.6248e-06	0.82576
Qkernel.CORE.4D	avgbs_398565.1.49	0.0399202				0.27447	0.19215	0.74164	0.52724	0.01789	0.99914	0.66347	3.7592e-13	0.79057	0.5502	0.86389	0.36934	9.5164e-13	0.75773	0.57372	0.00010506	0.23736	0.05648	0.00081925	0.02649	0.14584	0.00044415	0.00036574	0.42936	0.31462	0.02203	0.02356	0.16209	0.00165	0.27919	0.0014	0.0078	0.21654	0.00744	0.00888	0.85282	0.00756	0.45915	0.25079	0.06952	0.01665	0.04217	1.0393e-08	0.89659
Qkernel.CORE.4D	avgbs_cluster_9214.1.42	0.0399202				0.50421	0.98329	0.90608	0.80172	0.33526	0.41227	0.28706	9.3579e-11	0.26481	0.83349	0.21052	0.6773	2.0422e-10	0.65026	0.06354	0.00041218	0.44909	0.66148	0.00556	0.04827	0.63538	0.00135	0.00364	0.76661	0.21871	0.73462	0.36907	0.23743	0.00183	0.06916	0.02939	0.02389	0.96389	0.01054	0.05406	0.78662	0.02267	0.5607	0.526	0.05674	0.22052	0.31572	1.6732e-06	0.9021
Qkernel.CORE.4D	avgbs2_99129.1.54	0.0399202				0.00167	0.80294	0.33648	0.05874	0.00629	0.01553	0.00115	0.0085	0.74683	0.00026843	5.0814e-07	0.0025	0.00343	1.4609e-05	3.5047e-06	0.14324	0.29553	0.70073	0.26107	0.15236	0.00228	0.08416	0.08708	0.92619	0.92416	0.34529	0.03995	0.09094	0.22997	0.91359	0.10699	0.05716	0.00306	0.06469	0.11578	0.40313	0.76936	0.05581	0.16865	0.16948	0.19273	0.10261	0.12544	0.78842
Qkernel.CORE.4D	avgbs_314268.1.57	0.0419162				0.8784	0.89223	0.30404	0.77491	0.86613	0.86017	0.78738	6.5884e-08	0.78063	0.76807	0.88691	0.40911	1.0254e-06	0.87158	0.74041	0.00175	0.97403	0.29354	0.00121	0.01055	0.06848	0.00303	0.00235	0.31927	0.30213	0.71117	0.0374	0.07046	0.00915	0.37056	0.00456	0.0044	0.03969	0.00399	0.00851	0.00102	0.00536	0.33738	0.30282	0.01883	0.00011211	0.00121	0.00028478	0.85111
Qkernel.CORE.4D	avgbs2_151581.1.11	0.0419162				0.39972	0.55461	0.86763	0.92682	0.23401	0.31779	0.12562	0.25956	8.5559e-06	1.8121e-06	4.6406e-08	0.00040221	0.26932	0.08832	5.2954e-05	0.58772	0.2483	0.1369	0.26326	0.93188	0.28571	0.55612	0.97076	0.60711	0.97162	0.49898	0.62061	0.53222	0.41133	0.28991	0.39579	0.96842	0.36349	0.4047	0.38952	0.17459	0.34767	0.86467	0.29932	0.01485	0.53906	0.75499	0.45562	0.31988
Qkernel.CORE.4D	avgbs_106281.1.58	0.0479042				0.29998	0.79083	0.32527	0.63522	0.05252	0.69133	0.52039	6.4214e-07	0.64195	0.94181	0.03301	0.4167	1.7087e-05	0.68569	0.18148	0.00253	0.39904	0.00144	0.00198	0.00127	0.0146	0.01369	0.00822	0.06264	0.96525	0.00971	0.06493	0.11795	0.00544	0.18783	0.00097535	0.00076587	0.07444	0.00698	0.01894	0.21726	0.00792	0.77898	0.63955	0.87137	0.00678	0.00132	0.00068543	0.50011
Qkernel.CORE.4D	avgbs_122334.1.47	0.0499002				0.42676	0.36383	0.39164	0.17769	0.94865	0.99077	0.28281	1.1896e-12	0.08575	0.15723	0.6277	0.13228	4.3013e-12	0.25508	0.49956	0.00217	0.29445	0.94216	0.01274	0.10166	0.99415	0.00198	0.01632	0.88844	0.23471	0.77348	0.56697	0.34547	0.00364	0.31634	0.02908	0.06342	0.74523	0.01618	0.13995	0.0578	0.04476	0.92681	0.05875	0.07851	0.33879	0.39377	1.869e-07	0.30724
Qkernel.CORE.4D	avgbs2_117890.1.13	0.0518962				0.000434	0.70287	0.20961	0.00299	0.01029	0.00459	0.0014	0.0056	0.73305	8.0881e-05	2.5661e-09	0.00081094	0.0017	3.8957e-05	1.1593e-06	0.27546	0.22793	0.54139	0.57	0.18698	0.00802	0.14325	0.02935	0.96094	0.055	0.31417	0.02548	0.01332	0.08422	0.14506	0.30977	0.02321	0.00548	0.07543	0.16095	0.29971	0.65445	0.0327	0.52261	0.19057	0.22964	0.21785	0.06467	0.96318
Qkernel.CORE.4D	avgbs2_32145.1.42	0.0518962				0.77023	0.85752	0.43494	0.55283	0.67037	0.18661	0.38113	2.1834e-12	0.9975	0.42784	8.5776e-05	0.41585	2.0332e-11	0.55019	0.00087641	5.1276e-05	0.23874	0.01244	2.7657e-05	0.0003764	0.01183	0.00112	2.4759e-05	0.20003	0.04071	0.01522	0.00057005	0.00147	0.00098451	0.0571	0.00040554	8.7576e-05	0.03759	0.00149	0.01959	0.04982	0.00312	0.3867	0.28848	0.7388	0.00851	0.01811	3.1584e-05	0.32267
Qkernel.CORE.4D	avgbs2_44001.2.26	0.0538922				0.32929	0.5293	0.71634	0.50904	0.9289	0.95679	0.41958	2.5696e-08	0.86127	0.63537	0.93371	0.46307	3.1093e-08	0.12924	0.86852	0.02211	0.72278	0.00934	0.02746	0.19644	7.2321e-05	0.0191	0.04504	0.59694	0.8643	0.01326	0.08117	0.14655	0.01433	0.99694	0.08626	0.06267	0.00053215	0.01683	0.00265	0.00573	0.00036272	0.02339	0.12252	0.63837	0.00101	0.00423	0.00023967	0.67732
Qkernel.CORE.4D	avgbs_109039.1.20	0.0558882				0.22952	0.47755	0.85459	0.98518	0.86051	0.38157	0.05314	3.5085e-10	0.49081	0.24484	0.63334	0.85696	2.0181e-09	0.796	0.30991	0.00013043	0.53607	0.00116	0.00035991	0.01395	2.693e-07	0.00014367	0.0033	0.01442	0.06747	0.01029	0.02037	0.00956	0.00959	0.40067	0.00108	0.01704	2.6517e-05	0.00055139	9.1715e-05	0.7501	0.00727	0.00217	0.02973	0.07271	2.4461e-05	2.2445e-05	0.00548	0.56431
Qkernel.CORE.4D	avgbs_33140.1.41	0.0558882				0.00325	0.86613	0.26492	0.03197	0.02451	0.00578	0.0016	0.02859	0.77061	0.00015518	3.097e-09	0.00070808	0.01882	3.4336e-05	8.7925e-07	0.25997	0.28727	0.85311	0.41935	0.192	0.0088	0.16627	0.15759	0.66001	0.62843	0.46049	0.05204	0.14432	0.32296	0.42736	0.25341	0.13506	0.01106	0.11429	0.39682	0.37352	0.95558	0.13097	0.46383	0.2671	0.34862	0.40331	0.15167	0.66589
Qkernel.CORE.4D	avgbs_cluster_11196.1.10	0.0618762				0.00229	0.37321	0.31774	0.11436	0.00165	0.02103	0.00603	0.66885	0.48867	0.85583	0.67371	0.27497	0.51912	0.46467	0.39821	0.73066	0.72079	0.42953	0.78787	0.495	0.88267	0.3945	0.64682	0.94407	0.64001	0.41291	0.93394	0.53686	0.97854	0.42197	0.96119	0.90321	0.63622	0.24879	0.91662	0.61576	0.38169	0.74768	0.98531	0.34467	0.46797	0.56345	0.01279	3.6309e-08
Qkernel.CORE.4D	avgbs2_87801.1.26	0.0658683				0.08805	0.58864	0.94013	0.31984	0.13919	0.57906	0.28034	8.2873e-14	0.61886	0.97761	0.00714	0.5398	5.3536e-13	0.52256	0.08086	5.154e-07	0.76715	2.0779e-05	1.2755e-06	3.7333e-06	2.0903e-05	7.4952e-05	3.1255e-05	0.53922	0.80606	1.3014e-05	0.00105	0.0005742	0.0008998	0.29792	2.429e-05	1.9366e-06	0.00025468	0.00071963	0.00592	0.37428	0.00040891	0.90638	0.26084	0.74413	0.00171	0.00018837	2.7472e-07	0.23645
Qkernel.CORE.4D	avgbs_cluster_39561.1.9	0.0698603				0.00029346	0.4283	0.12767	0.03257	0.0026	0.01199	0.00045339	1.4054e-07	0.32177	0.05295	0.00055225	0.00073163	4.0715e-07	0.02755	0.00041628	0.01152	0.96258	0.02102	0.02927	0.09659	4.3028e-06	0.00909	0.00779	0.64053	0.82987	0.0067	0.01636	0.15025	0.01355	0.77294	0.04155	0.01362	3.4215e-05	0.00513	0.01955	0.0074	0.00296	0.03895	0.1841	0.62571	0.01121	0.01682	0.00023215	0.46302
Qkernel.CORE.4D	avgbs_cluster_1181.1.58	0.0798403				0.00973	0.35039	0.09537	0.01293	0.07216	0.37546	0.40916	8.2061e-07	0.56773	0.0626	0.68682	0.65335	3.2584e-06	0.8683	0.25256	0.00116	0.47744	0.00080946	0.03583	0.00784	1.6205e-06	0.00247	0.04047	0.09423	0.07877	0.07126	0.01252	0.32989	0.03011	0.66874	0.28945	0.02171	0.00010834	0.00383	0.00353	0.88174	0.0092	0.25003	0.07624	0.25891	0.01809	0.00038165	0.01406	0.49279
Qkernel.CORE.4D	avgbs_60060.1.62	0.0818363				2.6748e-06	0.30762	0.00206	0.05111	2.5449e-05	0.00525	1.8277e-06	0.58878	0.74251	0.82471	0.71289	0.32472	0.47115	0.44431	0.36686	0.88433	0.76743	0.94402	0.82463	0.32224	0.81717	0.6813	0.89853	0.5502	0.58272	0.87427	0.98629	0.49017	0.90267	0.43655	0.54922	0.75374	0.64147	0.44307	0.31109	0.47503	0.70781	0.20909	0.38936	0.18652	0.53381	0.4923	0.00803	1.2438e-08
Qkernel.CORE.4D	avgbs_67838.1.21	0.0918164				0.13623	0.92755	0.07521	0.97432	0.16261	0.47864	0.67476	3.4765e-10	0.07983	0.64996	0.85263	0.30631	2.342e-09	0.70087	0.49487	0.01866	0.64997	0.03653	0.03858	0.1139	7.4833e-05	0.01077	0.02625	0.78019	0.21036	0.03998	0.02706	0.54684	0.01107	0.58858	0.07223	0.06978	0.00203	0.00816	0.00396	0.00063013	0.00072154	0.03694	0.13457	0.2625	0.0022	0.00806	4.4994e-06	0.49878
Qkernel.CORE.4D	avgbs2_48302.1.60	0.10978				0.80412	0.16329	0.27341	0.50699	0.97251	0.38366	0.66261	2.6589e-07	0.14012	0.33734	0.62713	0.38501	2.3311e-07	0.33415	0.95711	0.0142	0.35301	0.0724	0.02845	0.05852	0.15868	0.04889	0.00686	0.68319	0.34404	0.09616	0.02353	0.00647	0.08959	0.10087	0.01699	0.00648	0.35305	0.15043	0.02241	0.47344	0.00332	0.40555	0.04368	0.75496	0.08316	0.09346	1.1611e-05	0.54486
Qkernel.CORE.4D	avgbs2_128162.1.33	0.115768				0.75952	0.66831	0.2921	0.48692	0.38078	0.56955	0.05154	9.8998e-10	0.7856	0.82823	0.91347	0.46845	4.0854e-09	0.24086	0.43542	0.01451	0.38515	0.01717	0.07501	0.15044	0.00019813	0.00229	0.01829	0.56339	0.86699	0.03588	0.00774	0.27256	0.01661	0.49995	0.03879	0.08283	0.00375	0.00085963	0.00212	0.01186	0.00050578	0.05042	0.12087	0.30053	0.00282	0.00382	2.3233e-06	0.37574
Qkernel.CORE.4D	avgbs2_97018.1.34	0.123752				0.39709	0.89709	0.39461	0.20515	0.5722	0.49926	0.93315	0.43003	0.76807	0.11945	0.34846	0.78271	0.59423	0.63183	0.2643	0.65525	0.52607	0.72057	0.56608	0.52027	0.71069	0.9334	0.48634	0.21514	0.68396	0.50718	0.33838	0.63474	0.47867	0.47687	0.83905	0.55592	0.58454	0.98365	0.42578	0.85846	0.73594	0.10753	0.42808	0.61124	0.48173	0.65735	0.01068	0.00226
Qkernel.CORE.4D	avgbs_4630.1.37	0.127745				0.58087	0.32739	0.83988	0.31047	0.44297	0.87	0.90132	8.3018e-10	0.33142	0.27849	0.2916	0.18877	7.6245e-09	0.78476	0.15266	0.02149	0.44609	0.44137	0.05781	0.29742	0.29261	0.02725	0.06653	0.59158	0.50351	0.50745	0.59556	0.53125	0.01432	0.05734	0.22894	0.38822	0.40523	0.11313	0.14051	0.61	0.0549	0.93962	0.06207	0.15223	0.27897	0.84431	2.0528e-05	0.71179
Qkernel.CORE.4D	avgbs_cluster_14339.1.22	0.133733				0.41988	0.86514	0.27389	0.3588	0.39907	0.62891	0.86664	0.42626	0.83984	0.12797	0.57347	0.88256	0.5208	0.73523	0.15683	0.63199	0.77704	0.78435	0.69366	0.35406	0.92251	0.90721	0.4283	0.13637	0.78302	0.53982	0.18048	0.59019	0.58323	0.19829	0.99268	0.32096	0.61077	0.982	0.58778	0.69505	0.57044	0.34836	0.77269	0.80715	0.69947	0.61108	0.01879	0.00248
Qkernel.CORE.4D	avgbs2_28921.1.11	0.151697				0.99485	0.31911	0.80456	0.55903	0.87628	0.19524	0.52094	3.4852e-07	0.14106	0.92425	0.76146	0.84502	3.2702e-07	0.13544	0.27495	0.10172	0.93865	0.69843	0.01252	0.15993	0.05616	0.34723	0.08913	0.45254	0.43949	0.56175	0.11916	0.12702	0.26045	0.91434	0.03449	0.10494	0.08326	0.36552	0.53708	0.27232	0.24556	0.44332	0.40509	0.45157	0.08585	0.51571	5.7527e-09	0.72391
Qkernel.CORE.4D	avgbs_48623.1.57	0.163673				0.93422	0.4112	0.55861	0.98885	0.64581	0.52766	0.58823	2.6268e-08	0.41795	0.64061	0.85717	0.73801	9.471e-09	0.36737	0.73047	0.00052916	0.60906	0.27416	0.00273	0.04812	0.98653	0.00061031	0.00174	0.43025	0.81382	0.09232	0.06207	0.09627	0.00383	0.30471	0.0015	0.05248	0.60809	0.00295	0.00892	0.67755	0.00356	0.78237	0.06007	0.28747	0.00789	0.01108	8.5743e-06	0.71765
Qkernel.CORE.4D	avgbs_cluster_31359.1.50	0.171657				0.30305	0.32745	0.11314	0.46007	0.20815	0.32164	0.30615	2.4733e-08	0.5007	0.83949	0.93933	0.98081	6.1332e-08	0.34189	0.39617	0.00929	0.41266	0.02433	0.01396	0.04735	8.6933e-05	0.00581	0.01778	0.42027	0.64426	0.03397	0.01415	0.40374	0.00927	0.86183	0.0416	0.06703	0.00146	0.01026	0.00377	0.00486	0.00072949	0.02888	0.10266	0.42321	0.00167	0.0055	0.00057794	0.14534
Qkernel.CORE.4D	avgbs_cluster_4977.1.11	0.175649				0.7462	0.22994	0.48417	0.38361	0.74635	0.28069	0.86283	2.2339e-07	0.1801	0.7521	0.65037	0.99243	2.2786e-07	0.12649	0.14056	0.10535	0.97331	0.65786	0.0102	0.19747	0.05211	0.37113	0.09833	0.4327	0.41644	0.4463	0.18912	0.15657	0.24839	0.72002	0.05066	0.12149	0.08807	0.35816	0.6347	0.28384	0.23119	0.65801	0.43677	0.67666	0.1069	0.54325	9.4414e-09	0.70131
Qkernel.CORE.4D	avgbs2_144845.2.33	0.183633				0.00282	0.58555	0.30343	0.10206	0.00124	0.0196	0.00214	0.00938	0.77873	0.02339	0.32731	0.51392	0.00923	0.41555	0.02146	0.03088	0.11464	0.10563	0.12341	0.03725	0.04866	0.02553	0.05614	0.42811	0.08493	0.5123	0.12506	0.17523	0.30789	0.34487	0.31483	0.08025	0.04324	0.03847	0.39874	0.07098	0.0591	0.57074	0.17003	0.15004	0.1071	0.31579	0.00029742	8.7106e-05
Qkernel.CORE.4D	avgbs_cluster_5508.1.29	0.199601				0.41187	0.5758	0.26003	0.35997	0.48985	0.80818	0.26249	1.0124e-07	0.63289	0.52111	0.76897	0.70469	4.0785e-07	0.24855	0.85596	0.01758	0.11676	0.55115	0.10001	0.05977	0.73667	0.00623	0.13848	0.67135	0.47617	0.55891	0.46981	0.79563	0.06737	0.39027	0.35217	0.16421	0.68124	0.01753	0.05501	0.70577	0.04703	0.62044	0.50076	0.1609	0.2691	0.05731	2.4379e-05	0.13255
Qkernel.CORE.4D	avgbs_cluster_11066.1.30	0.201597				0.64011	0.02215	0.83089	0.09525	0.57175	0.91709	0.21635	2.0412e-07	0.12961	0.78236	0.20447	0.04114	2.2294e-06	0.06524	0.20412	0.06951	0.11963	0.08875	0.19863	0.39363	0.0002822	0.0119	0.15346	0.68254	0.04822	0.10624	0.19163	0.80214	0.03325	0.02312	0.3753	0.25891	0.00506	0.00701	0.048	0.34018	0.00415	0.1348	0.25613	0.19572	0.18181	0.07531	0.00019657	0.97052
Qkernel.CORE.4D	avgbs2_57278.1.30	0.201597				0.54193	0.02174	0.74313	0.09247	0.52427	0.9233	0.21522	2.1518e-07	0.17527	0.72029	0.22347	0.04251	2.4366e-06	0.07369	0.19767	0.07418	0.09204	0.08863	0.18697	0.4328	0.00028228	0.01273	0.16279	0.60504	0.05947	0.09448	0.17866	0.80202	0.03317	0.02385	0.35219	0.26194	0.00506	0.00704	0.04889	0.34256	0.00346	0.14133	0.26126	0.22995	0.17427	0.07629	0.0002382	0.9726
Qkernel.CORE.4D	avgbs2_102242.1.39	0.225549				0.19751	0.93972	0.35991	0.01414	0.81778	0.98004	0.7467	0.22312	0.69623	0.13364	0.37388	0.39261	0.53712	0.17506	0.06871	0.93519	0.5013	0.8216	0.84317	0.87704	0.85966	0.84595	0.8154	0.44143	0.84944	0.85182	0.67697	0.61467	0.68036	0.81661	0.60704	0.8244	0.88454	0.93799	0.94629	0.21895	0.97738	0.43967	0.82795	0.49494	0.8586	0.78634	0.00508	0.00142
Qkernel.CORE.4D	avgbs_cluster_3138.1.9	0.243513				0.00368	0.22205	0.10876	0.01272	0.00487	0.33801	0.02148	4.7352e-08	0.13128	0.09582	0.99732	0.30667	1.4525e-07	0.56833	0.3252	0.00271	0.81333	0.16002	0.08315	0.08013	0.11217	0.00196	0.0124	0.85428	0.48402	0.12061	0.1424	0.52918	0.00143	0.15275	0.10302	0.09466	0.02333	0.00545	0.03728	0.44089	0.03407	0.84931	0.33058	0.01529	0.11418	0.18217	1.9178e-05	0.99622
Qkernel.CORE.4D	avgbs_cluster_38127.1.20	0.269461				0.97533	0.56794	0.82975	0.54904	0.59138	0.65828	0.02028	2.8875e-09	0.71067	0.9073	0.87871	0.94728	1.3144e-08	0.56214	0.84656	0.00383	0.02702	0.00742	0.01549	0.06679	0.00040468	0.00039965	0.01036	0.59077	0.21886	0.01267	0.02668	0.1931	0.01963	0.344	0.02722	0.0385	0.00567	0.00053172	0.00211	0.00847	0.00025767	0.0255	0.10232	0.49937	0.00111	0.00291	9.9692e-05	0.13069
Qkernel.CORE.4D	avgbs2_160837.2.29	0.271457				0.43753	0.24593	0.56671	0.78487	0.00604	0.38408	0.80931	0.51715	0.00472	0.47952	3.956e-07	0.4369	0.25433	0.16744	0.17969	0.0291	0.62684	0.01633	0.08742	0.10026	0.38383	0.15789	0.17117	0.57133	0.71344	0.15043	0.35779	0.35186	0.15964	0.6462	0.39603	0.28703	0.52025	0.57206	0.19105	0.95703	0.26994	0.23802	0.16948	0.82951	0.54775	0.4771	0.78317	0.54708
Qkernel.CORE.4D	avgbs_42557.1.34	0.289421				0.13807	0.36432	0.08969	0.63319	0.03874	0.035	0.81288	3.3856e-08	0.93683	0.84703	0.7229	0.73273	7.8796e-08	0.336	0.72831	0.00014049	0.26442	0.00066664	0.0002577	0.00217	1.1758e-06	0.00193	0.0017	0.01356	0.07681	0.00277	0.00506	0.00254	0.01735	0.00465	0.0014	0.00364	2.067e-05	0.00559	0.00385	0.76548	0.00849	0.09766	0.21557	0.34572	0.00555	0.00028462	0.03481	0.70196
Qkernel.CORE.4D	avgbs_cluster_34330.1.39	0.291417				0.00626	0.88079	0.56226	0.07206	0.01529	0.01308	0.00147	0.02706	0.24536	0.00037862	9.2631e-09	0.0012	0.01168	2.9354e-05	3.45e-06	0.3257	0.07809	0.85317	0.54064	0.33436	0.00631	0.20662	0.21277	0.97316	0.59115	0.45286	0.12505	0.24281	0.11415	0.40236	0.35837	0.1364	0.00236	0.11728	0.41381	0.12681	0.95479	0.13718	0.63703	0.04294	0.23389	0.35926	0.34722	0.51941
Qkernel.CORE.4D	avgbs2_142473.1.38	0.291417				0.54162	0.34469	0.45598	0.37796	0.82604	0.56212	0.33357	6.6562e-10	0.80691	0.40679	0.22192	0.67862	5.1733e-09	0.79872	0.96541	0.01838	0.60436	0.04268	0.07748	0.16651	0.00042353	0.00924	0.05198	0.59647	0.90503	0.05476	0.05493	0.41057	0.02354	0.52731	0.08444	0.09877	0.00635	0.01085	0.00289	0.01268	0.00092215	0.0191	0.06829	0.72713	0.00288	0.00486	6.3257e-06	0.19996
Qkernel.CORE.4D	avgbs2_97018.1.24	0.295409				0.62537	0.4282	0.49139	0.23871	0.53263	0.9236	0.90272	0.09429	0.4148	0.08285	0.27105	0.81694	0.24206	0.65431	0.08103	0.9044	0.69112	0.71574	0.93644	0.84046	0.9961	0.84522	0.57248	0.56391	0.80095	0.66922	0.45594	0.7108	0.2596	0.39104	0.9196	0.63715	0.94794	0.86567	0.84412	0.72103	0.85489	0.36107	0.58739	0.63476	0.87322	0.93641	0.01442	0.00168
Qplump.Aberd17.2A	avgbs2_190926.2.35	0.0738523	Mrg33	Chr2A	59.3	0.09402	0.13843	0.28452	0.1876	0.59895	0.33693	0.84126	0.06205	0.16365	0.47967	0.00101	0.49704	0.18587	0.50665	0.0335	0.00037322	0.0002264	4.1054e-08	0.00722	0.00744	0.66884	0.10949	0.00074059	0.68649	0.54818	8.7593e-05	0.0039	0.02009	0.0012	0.69904	0.0119	0.00119	0.49019	0.09049	0.00692	0.07966	0.0001494	0.0494	0.0386	0.22005	0.00725	0.01274	0.02364	0.99788
Qplump.Saska10.7A	avgbs2_181490.2.45	0.0159681	Mrg12	Chr7A	61.4	0.74304	0.91814	0.30614	0.57707	0.54675	0.74927	0.77349	0.00017858	0.70629	0.00017564	0.0005361	0.94916	0.00017941	0.07749	0.0254	3.3268e-06	0.90909	0.04307	1.1636e-07	8.8042e-05	0.00059958	6.9152e-05	0.00255	0.41145	0.47121	0.15384	0.00123	0.01228	0.00389	0.32469	0.00109	0.00274	0.00197	0.00127	0.04822	0.25657	0.2388	0.29155	0.03961	0.09287	0.02366	0.05579	0.00039524	0.96845
Qplump.Saska11.Unk	avgbs_9554.1.15	0.0678643	Mrg24	Chr5A	41.8	0.59444	0.39835	0.26283	0.2811	0.20006	0.8092	0.87451	0.32045	0.06231	0.0458	0.89671	0.2314	0.15572	0.16865	0.23466	1.9687e-05	0.00655	0.0007242	0.00010252	3.4894e-07	0.01428	0.00186	0.00036402	0.02545	0.07031	0.00326	0.00098389	0.00396	0.01498	0.0011	0.00315	8.3056e-05	0.02222	0.04625	0.06428	0.04121	0.01951	0.02258	0.78984	0.58999	0.06247	0.00566	0.26569	0.04584
Qplump.Saska11.Unk	avgbs2_180322.1.44	0.0958084	Mrg24	Chr5A	41.8	0.68578	0.30556	0.51471	0.59882	0.429	0.90734	0.20958	0.33143	0.03786	0.43409	0.68585	0.26427	0.22082	0.36036	0.36098	2.3654e-05	0.04075	0.0022	0.00012567	9.468e-07	0.06153	0.00083853	0.00034142	0.03289	0.06032	0.01435	0.00274	0.00717	0.00708	0.00335	0.00425	0.00035781	0.0561	0.01199	0.07425	0.07199	0.04566	0.02812	0.5505	0.59149	0.0988	0.00174	0.37399	0.07769
Qplump.Saska11.Unk	avgbs_4871	0.0738523	Mrg06	Chr5D	87.2	0.85785	0.09046	0.75214	0.44078	0.12295	0.79681	0.98861	0.34926	0.11951	0.09921	0.72246	0.089	0.28539	0.09509	0.24223	3.5987e-06	0.01372	0.00025737	2.3806e-05	3.0726e-07	0.01047	0.00027624	0.00024481	0.02187	0.08229	0.00217	0.0013	0.00409	0.00902	0.00047814	0.00494	0.00012244	0.00863	0.02208	0.06064	0.02245	0.01582	0.01967	0.8582	0.57995	0.05228	0.00548	0.2599	0.08868
Qthins.Saska10.Unk	avgbs_cluster_20577.1.16	0.129741				0.74339	0.55048	0.24078	0.9409	0.12873	0.85252	0.06943	0.22899	0.0147	0.458	0.58713	0.04172	0.2629	0.3918	0.34518	2.0951e-05	0.23563	9.7894e-06	3.7983e-06	0.00023381	0.00611	0.0001667	2.323e-05	0.03218	0.00444	0.00035732	0.00301	0.00076261	0.00040338	0.00103	6.2493e-07	0.000183	0.00432	0.00029251	3.1541e-05	0.10358	0.00112	0.00076293	0.00656	0.06223	4.2096e-06	0.00111	0.73884	0.49847
QTKW.Abery10.2A	avgbs_cluster_7015.1.27	0.0159681	Mrg33	Chr2A	34	0.62315	0.65926	0.84497	0.26102	0.79962	0.52821	0.63935	5.0527e-06	0.87381	0.45614	0.28985	0.89465	9.8296e-06	0.67357	0.87309	0.00041204	0.96099	0.00298	0.00021864	0.00208	8.738e-06	7.8121e-05	5.4475e-05	0.06844	0.04426	0.00174	0.00021752	0.00023793	0.0006317	0.00029729	0.00031297	0.00032569	6.8171e-05	1.6792e-05	1.3827e-06	0.18481	0.00101	2.9718e-07	0.0197	0.03681	6.7762e-06	0.00045365	0.01078	0.71506
QTWT.CORE.3C	avgbs_cluster_24174.1.59	0.0758483	Mrg15	Chr3C	70.2	0.15893	0.95909	0.03504	0.0746	0.87325	0.84286	0.81698	1.0618e-06	0.80369	0.17028	0.31268	0.39929	4.3542e-07	0.09333	0.31746	0.03805	0.48969	0.50343	0.01032	0.03789	0.01533	0.20612	0.04571	0.1126	0.12386	0.77256	0.07571	0.17436	0.32932	0.38208	0.03085	0.01184	0.02269	0.22969	0.43781	0.07931	0.19402	0.82559	0.70407	0.22776	0.09667	0.36453	6.0567e-08	0.60945
QTWT.CORE.5D	avgbs_67386.1.27	0.0818363	Mrg01	Chr1D	95	0.02819	0.29891	0.09828	0.0185	0.48119	0.12356	0.01577	0.00184	0.90477	0.24243	0.43429	0.42341	0.00138	0.45853	0.01302	0.19246	0.96518	0.95308	0.04833	0.10038	0.0742	0.42443	0.03808	0.13907	0.16629	0.92462	0.02777	0.04006	0.12034	0.5157	0.05984	0.05728	0.10114	0.38137	0.35246	0.06473	0.33785	0.20057	0.31226	0.84636	0.16008	0.37678	1.5548e-05	0.91501
QTWT.CORE.5D	avgbs_405598.1.29	0.0159681	Mrg06	Chr5D	26.4	0.71539	0.60384	0.06824	0.62458	0.5404	0.89986	0.60747	0.04179	0.15199	0.05678	0.03491	0.84424	0.02294	0.33588	0.07234	0.38317	0.30972	0.16749	0.70131	0.50812	0.07086	0.31654	0.75741	0.09797	0.52527	0.50345	0.20368	0.46978	0.37141	0.16476	0.16425	0.87711	0.10493	0.4451	0.5914	0.31853	0.32178	0.10344	0.94201	0.42345	0.49142	0.63387	3.8068e-07	0.07493
QTWT.CORE.5D	avgbs_35308.1.34	0.0139721	Mrg05	Chr6A	123.7	0.36775	0.42509	0.19446	0.31133	0.69321	0.00075803	0.55622	1.2258e-06	0.86461	0.10568	0.90687	0.85654	8.6725e-07	0.60429	0.34004	0.01048	0.66857	0.21785	0.00171	0.02952	1.3835e-06	0.03231	0.00537	0.94939	0.52248	0.25287	0.05553	0.08712	0.00715	0.62906	0.01154	0.00366	7.6892e-05	0.04249	0.01083	0.54267	0.02322	0.03906	0.30364	0.13596	0.00658	0.19545	7.2274e-05	0.32039
QTWT.CORE.5D	avgbs2_197509.1.21	0.0858283	Mrg12	Chr7A	63.5	0.51723	0.75973	0.29726	0.59233	0.90998	0.9643	0.7464	0.09762	0.41725	0.07902	0.0312	0.95693	0.11773	0.1395	0.12809	0.64701	0.53969	0.49466	0.79057	0.96077	0.57157	0.51617	0.9931	0.03377	0.34329	0.27107	0.50963	0.68712	0.13444	0.09249	0.73337	0.90183	0.49342	0.38377	0.50161	0.18209	0.243	0.39866	0.47395	0.60737	0.67355	0.37433	0.00359	0.00385
QTWT.CORE.5D	avgbs2_70401.1.63	0.0239521				0.55401	0.57937	0.73685	0.86405	0.21182	0.14432	0.51959	0.0007456	0.07515	0.58569	0.37226	0.09904	0.00039402	0.60513	0.47427	0.42242	0.77532	0.89133	0.04566	0.40316	0.01055	0.7002	0.1904	0.21323	0.28946	0.98543	0.12304	0.29894	0.26674	0.57289	0.10507	0.17981	0.01864	0.51843	0.68102	0.24123	0.38581	0.65817	0.67712	0.74215	0.19281	0.58283	3.7696e-06	0.86956
QTWT.CORE.6A	avgbs_cluster_6636.1.18	0.0998004	Mrg28	Chr1C	36.8	0.53699	0.02189	0.79362	0.44369	0.95543	0.06331	0.63613	0.8406	0.44325	0.40998	0.85222	0.73621	0.7682	0.10554	0.61833	0.62307	0.22244	0.43001	0.16131	0.74366	0.14803	0.89572	0.09349	0.43377	0.20659	0.17468	0.13261	0.00845	0.04107	0.18167	0.13817	0.37155	0.20412	0.63423	0.04944	0.23965	0.03627	0.40008	0.06315	0.78499	0.01219	0.08185	0.36447	0.00045023
QTWT.CORE.6A	avgbs_206798.1.38	0.0359281	Mrg13	Chr2C	42.1	0.45288	0.53525	0.98579	0.17048	0.68332	0.56135	0.68036	5.9757e-06	0.2462	0.54447	0.32366	0.5326	4.5233e-05	0.5919	0.61323	0.36714	0.31859	0.45198	0.39225	0.74671	0.00082426	0.08959	0.73803	0.77582	0.09483	0.51848	0.57681	0.32667	0.36266	0.33498	0.39787	0.66812	0.00965	0.04673	0.6885	0.24145	0.0788	0.70791	0.5627	0.4633	0.6918	0.83589	0.29853	1.3867e-06
QTWT.CORE.6A	avgbs2_71633.1.22	0.0239521	Mrg08	Chr2D	51.3	0.0039	0.9224	0.13846	1.8012e-05	0.28248	0.93823	0.91822	0.10464	0.50096	0.29163	0.35077	0.60702	0.08266	0.77432	0.23367	0.30075	0.15397	0.10712	0.9235	0.29381	0.79098	0.25583	0.73032	0.10683	0.55005	0.61219	0.1122	0.86497	0.51139	0.35644	0.55519	0.6963	0.96771	0.40446	0.37157	0.70795	0.71746	0.73873	0.54044	0.56133	0.69874	0.29722	0.00526	0.2023
QTWT.CORE.6A	avgbs_cluster_6654.1.13	0.0159681	Mrg23	Chr3A	28.5	0.08066	0.64548	0.27706	0.30826	0.80591	0.57664	0.92924	0.00348	4.4799e-05	0.27238	0.14585	0.04613	0.00325	0.4959	0.97868	0.40892	0.0199	0.6766	0.04239	0.47009	0.47627	0.85227	0.5165	0.89677	0.15393	0.52754	0.64397	0.1345	0.95442	0.23852	0.33975	0.6608	0.33274	0.64851	0.22886	0.56792	0.5704	0.24471	0.69178	0.98331	0.19977	0.44177	6.9234e-06	0.72169
QTWT.CORE.6A	avgbs2_179536.1.51	0.0259481	Mrg23	Chr3A	47.8	0.09275	0.48493	0.51159	0.39771	0.24082	0.64389	0.54185	0.00129	0.00062935	0.0932	0.4622	0.00704	0.00197	0.92668	0.2457	0.0486	0.38475	0.65266	0.0212	0.03157	0.30933	0.05001	0.05198	0.39861	0.05496	0.82231	0.05395	0.0151	0.4549	0.09068	0.05353	0.11788	0.49822	0.03935	0.13174	0.08346	0.38734	0.69011	0.16824	0.23495	0.07696	0.15279	3.2689e-05	0.99401
QTWT.CORE.6A	avgbs_cluster_14920.1.14	0.0259481	Mrg23	Chr3A	48.3	0.22521	0.50698	0.24079	0.65701	0.78327	0.74526	0.80052	3.884e-05	0.06778	0.03238	0.00587	0.56192	9.8516e-06	0.12857	0.24896	0.06276	0.92914	0.30716	0.10456	0.04293	0.15371	0.25269	0.07007	0.60486	0.19697	0.48287	0.13856	0.06212	0.18792	0.11155	0.29206	0.06346	0.18578	0.33473	0.21028	0.17382	0.8608	0.98208	0.73587	0.10388	0.22621	0.13086	6.2154e-06	0.67102
QTWT.CORE.6A	avgbs_119183.1.14	0.0179641	Mrg23	Chr3A	53.7	0.45633	0.10882	0.6707	0.58527	0.85335	0.51744	0.70322	3.0836e-06	0.07483	0.00144	0.00076012	0.37393	7.031e-06	0.19623	0.11669	0.35469	0.86555	0.43763	0.21611	0.34517	0.15723	0.32743	0.60202	0.79567	0.98871	0.73688	0.94522	0.28554	0.25444	0.85043	0.3798	0.22204	0.11305	0.25051	0.86781	0.7124	0.69418	0.96112	0.61696	0.73245	0.65303	0.92791	3.1656e-06	0.68939
QTWT.CORE.6A	avgbs_110516.1.47	0.0159681	Mrg23	Chr3A	53.8	0.32891	0.9057	0.11347	0.45942	0.99387	0.95437	0.72372	2.3062e-05	0.37427	0.00156	0.03294	0.93484	7.3725e-05	0.92698	0.08189	0.23758	0.25623	0.32945	0.31582	0.113	0.17352	0.31144	0.33929	0.33283	0.58911	0.9057	0.52237	0.31363	0.6265	0.36715	0.47944	0.08623	0.22748	0.20454	0.89386	0.00823	0.70626	0.63169	0.99616	0.13238	0.98076	0.7411	3.2222e-06	0.00156
QTWT.CORE.6A	avgbs_7433.1.17	0.0239521	Mrg23	Chr3A	58	0.97773	0.11382	0.70074	0.25624	0.53409	0.99335	0.74188	0.00228	0.02243	0.02042	0.31575	0.55429	0.00165	0.53877	0.17191	0.82335	0.63685	0.13584	0.77322	0.97827	0.82079	0.46076	0.61301	0.64633	0.71149	0.33015	0.44454	0.95493	0.82627	0.17354	0.9555	0.86164	0.93584	0.35915	0.26452	0.76849	0.10769	0.72195	0.44889	0.51719	0.79175	0.62232	3.4686e-06	0.61537
QTWT.CORE.6A	avgbs_22721.1.64	0.0938124	Mrg23	Chr3A	62.9	0.4193	0.74286	0.852	0.41273	0.0039	0.6212	0.65442	0.12412	0.01278	0.85509	0.04322	0.45353	0.09391	0.57892	0.56647	0.0296	0.11528	0.16427	0.03767	0.13666	2.7786e-05	0.0224	0.20895	0.8086	0.35893	0.43875	0.22672	0.44554	0.15238	0.19013	0.10222	0.19712	0.00069244	0.08133	0.29545	0.06394	0.52695	0.40976	0.36451	0.90587	0.00502	0.17076	0.05879	1.7113e-05
QTWT.CORE.6A	avgbs_201810.1.12	0.139721	Mrg15	Chr3C	32.7	0.65101	0.50656	0.85464	0.42914	0.3847	0.53745	0.81852	0.91827	0.1739	0.85376	0.43952	0.18067	0.89399	0.79235	0.05324	0.67241	0.01956	0.13271	0.83413	0.86181	0.2494	0.97559	0.86583	0.17293	0.70962	0.31901	0.89015	0.71947	0.56632	0.67271	0.7383	0.66574	0.23615	0.94263	0.63606	0.0591	0.23722	0.91922	0.21336	0.47305	0.51656	0.56118	0.26098	0.00024143
QTWT.CORE.6A	avgbs2_37120.1.30	0.351297	Mrg20	Chr4A	34.9	0.16226	0.16489	0.22389	0.27956	0.91134	0.13037	0.3088	0.58606	0.67597	0.99655	0.43288	0.5637	0.58235	0.36715	0.42092	0.24845	0.46349	0.73378	0.16763	0.25516	0.08005	0.19585	0.09201	0.13798	0.06184	0.68768	0.06344	0.43676	0.24158	0.58035	0.10642	0.11875	0.07516	0.06742	0.27848	0.14542	0.37017	0.18939	0.31943	0.6666	0.30342	0.28125	0.17147	0.04803
QTWT.CORE.6A	avgbs_cluster_8512.1.54	0.101796	Mrg20	Chr4A	156.7	0.16388	0.46009	0.10617	0.48129	0.53185	0.45586	0.91765	0.97184	0.84708	0.07139	0.35429	0.72436	0.9018	0.45581	0.62937	0.6243	0.292	0.57884	0.69603	0.41604	0.67305	0.51794	0.8608	0.23965	0.45484	0.79855	0.84384	0.88131	0.56834	0.92102	0.49714	0.71263	0.91602	0.85869	0.59364	0.86316	0.33724	0.86987	0.65778	0.5648	0.29704	0.32907	0.04233	2.1552e-05
QTWT.CORE.6A	avgbs2_77285.1.6	0.0139721	Mrg20	Chr4A	252.9	0.87339	0.04655	0.29701	0.61193	0.42644	0.87023	0.00128	0.00011416	0.62438	0.01052	0.05793	0.40744	2.1697e-05	0.32055	0.34527	0.16188	0.67686	0.59771	0.12002	0.27176	0.1461	0.21238	0.38649	0.04411	0.12958	0.12116	0.85024	0.36517	0.18017	0.41363	0.43057	0.20385	0.16961	0.02007	0.20492	0.87926	0.05406	0.49029	0.16018	0.95211	0.09693	0.07083	6.2965e-05	0.54762
QTWT.CORE.6A	avgbs_cluster_38763.1.20	0.139721	Mrg11	Chr4C	52.8	0.67584	0.6198	0.95271	0.50624	0.0817	0.80387	0.46506	0.71603	0.00971	0.80744	0.62247	0.73584	0.96294	0.10626	0.21146	0.25579	0.87747	0.4188	0.83989	0.57541	0.25637	0.25463	0.25541	0.31041	0.76179	0.47738	0.18854	0.42299	0.53879	0.81121	0.7623	0.47329	0.25439	0.1373	0.98982	0.41493	0.93989	0.95899	0.65065	0.88492	0.51239	0.74494	0.57038	0.00084952
QTWT.CORE.6A	avgbs_cluster_19833.1.37	0.399202	Mrg11	Chr4C	52.8	0.63236	0.65529	0.85949	0.94264	0.08905	0.77751	0.7371	0.72668	0.59873	0.73218	0.95322	0.65532	0.87991	0.78062	0.95264	0.33729	0.92213	0.09386	0.30231	0.58221	0.70293	0.25716	0.3449	0.79016	0.53573	0.25235	0.23318	0.23272	0.44916	0.5056	0.22057	0.74055	0.67182	0.20713	0.15883	0.75511	0.0446	0.46996	0.33473	0.66699	0.15176	0.27727	0.08793	0.00099256
QTWT.CORE.6A	avgbs2_90532.1.23	0.127745	Mrg11	Chr4C	60.5	0.58864	0.01336	0.57767	0.96694	0.01442	0.28844	0.08254	0.69524	0.66548	0.53261	0.77549	0.74948	0.56722	0.74374	0.86242	0.60609	0.88383	0.79952	0.59575	0.47461	0.53662	0.44158	0.71717	0.16298	0.18225	0.83764	0.37532	0.7222	0.79997	0.24271	0.51248	0.49088	0.45713	0.4856	0.58825	0.55092	0.89213	0.07694	0.67674	0.50329	0.51814	0.9939	0.33411	0.00757
QTWT.CORE.6A	avgbs_110567.1.56	0.0199601	Mrg21	Chr4D	27.3	0.56135	0.91824	0.86167	0.55186	0.49525	0.4442	0.26441	0.25311	0.3282	0.74586	0.91787	0.20193	0.25669	0.25065	0.58253	0.1686	0.49697	0.20197	0.33949	0.40979	0.22932	0.14983	0.4003	0.35266	0.87571	0.13369	0.50104	0.54361	0.98782	0.95145	0.33857	0.50165	0.2309	0.31127	0.0323	0.31845	0.02021	0.09371	0.19283	0.38281	0.06671	0.01272	0.10423	0.29116
QTWT.CORE.6A	avgbs_cluster_21311.1.23	0.0219561	Mrg21	Chr4D	27.3	0.89316	0.93199	0.42758	0.81819	0.85616	0.54176	0.4208	0.17063	0.07708	0.92057	0.79076	0.05568	0.38421	0.12815	0.79719	0.36866	0.69645	0.40578	0.79188	0.45129	0.55731	0.21268	0.65764	0.80349	0.96412	0.26398	0.52751	0.97387	0.93951	0.94352	0.79493	0.86877	0.64669	0.22771	0.18774	0.10737	0.14147	0.22545	0.42674	0.95691	0.59589	0.02704	0.03803	0.02657
QTWT.CORE.6A	avgbs_244492.1.31	0.0239521	Mrg21	Chr4D	122.8	0.79067	0.64463	0.95345	0.27169	0.24764	0.38423	0.71488	0.00127	0.14434	0.02569	0.02127	0.54576	0.01309	0.04353	0.51538	0.02858	0.63872	0.21547	0.06589	0.0331	0.16552	0.58628	0.19872	0.71984	0.74436	0.09348	0.33889	0.09178	0.79767	0.1596	0.10224	0.0233	0.30711	0.71471	0.0171	0.65406	0.03236	0.52018	0.71969	0.10461	0.60689	0.05501	0.01236	0.13328
QTWT.CORE.6A	avgbs_cluster_33351.1.41	0.0758483	Mrg03	Chr5C	58.3	0.01292	0.16744	0.13069	0.00817	0.32689	0.08463	0.66784	0.94781	0.92129	0.20809	0.36868	0.89257	0.98969	0.8564	0.08942	0.6574	0.73387	0.4939	0.6285	0.7506	0.73351	0.67016	0.90473	0.38318	0.53726	0.78042	0.99386	0.44751	0.83309	0.99387	0.50699	0.92022	0.75477	0.62421	0.82931	0.34103	0.78411	0.53877	0.28411	0.9451	0.92946	0.78713	0.79442	0.00133
QTWT.CORE.6A	avgbs2_83625.1.35	0.0179641	Mrg05	Chr6A	56.5	0.28773	0.45111	0.38324	0.77691	0.69504	0.54721	0.47952	3.7645e-06	0.19091	0.0253	0.00123	0.26942	3.9891e-07	0.5897	0.04202	0.26486	0.30386	0.16108	0.03899	0.36055	0.04262	0.25635	0.23929	0.98774	0.69425	0.58612	0.6804	0.06414	0.57948	0.48925	0.05268	0.22845	0.05157	0.16384	0.12478	0.44466	0.54632	0.38575	0.41475	0.19142	0.04836	0.27248	0.00123	0.2878
QTWT.CORE.6A	avgbs2_160178.1.34	0.0239521	Mrg05	Chr6A	57.3	0.11333	0.42317	0.5897	0.46188	0.52628	0.48426	0.0257	0.00021051	0.36683	0.18759	0.01709	0.17761	1.9891e-05	0.65001	0.35685	0.04104	0.50453	0.25133	0.02651	0.16195	0.0673	0.0328	0.07498	0.85068	0.63734	0.22245	0.13483	0.05088	0.51039	0.24245	0.01505	0.18078	0.07773	0.10166	0.1086	0.96992	0.25261	0.50415	0.24625	0.58515	0.04995	0.10584	0.00267	0.73453
QTWT.CORE.6A	avgbs_248174.1.44	0.0239521	Mrg05	Chr6A	57.4	0.42848	0.29836	0.40412	0.59746	0.90923	0.78616	0.20785	2.4088e-05	0.25813	0.00598	0.00297	0.00772	4.5453e-06	0.02541	0.08626	0.0368	0.00179	0.76034	0.00161	0.06094	0.06503	0.0571	0.11856	0.26427	0.75978	0.83763	0.34733	0.05057	0.53481	0.38307	0.0107	0.12728	0.05897	0.05798	0.05547	0.15564	0.05476	0.28009	0.18361	0.47767	0.01153	0.03092	0.00017053	0.68298
QTWT.CORE.6A	avgbs2_91061.1.8	0.0139721	Mrg05	Chr6A	81.7	0.194	0.13682	0.43263	0.48241	0.79943	0.94361	0.14578	0.00080176	0.17447	0.01745	0.0107	0.42276	0.00058391	0.65839	0.0157	0.29129	0.595	0.71187	0.13665	0.4135	0.94347	0.21476	0.48934	0.56569	0.14757	0.67577	0.98252	0.36703	0.55334	0.36041	0.28774	0.62341	0.74894	0.15382	0.57846	0.27093	0.29452	0.89044	0.18678	0.65319	0.28144	0.56092	5.8629e-07	0.53372
QTWT.CORE.6A	avgbs_309316.1.34	0.011976	Mrg05	Chr6A	81.9	0.43024	0.3861	0.76547	0.64488	0.60266	0.9305	0.2517	1.519e-05	0.48907	0.01047	0.00022982	0.34603	3.2142e-06	0.08009	0.12971	0.0147	0.71168	0.80672	0.00206	0.02961	0.09297	0.04017	0.02727	0.17537	0.06124	0.87825	0.06316	0.03336	0.03616	0.05226	0.03122	0.06747	0.11422	0.04513	0.13377	0.23252	0.34701	0.259	0.07308	0.72213	0.04342	0.11944	2.0933e-09	0.48154
QTWT.CORE.6A	avgbs_cluster_25811.1.12	0.42515	Mrg17	Chr6C	83.9	0.95919	0.67427	0.84658	0.66346	0.31587	0.39714	0.27248	0.76583	0.1311	0.27439	0.69493	0.42665	0.75541	0.26703	0.09256	0.74475	0.38095	0.80869	0.69401	0.62055	0.59042	0.52211	0.43184	0.29469	0.8001	0.83579	0.07816	0.54574	0.82936	0.62762	0.74818	0.88875	0.14491	0.47438	0.98133	0.8612	0.8079	0.95897	0.26994	0.7811	0.73807	0.95697	0.10696	0.00173
QTWT.CORE.6A	avgbs_cluster_22854.1.39	0.239521	Mrg12	Chr7A	63.5	0.32919	0.66187	0.6919	0.03682	0.55598	0.73146	0.42132	0.2489	0.22454	0.02341	0.08921	0.00518	0.49126	0.12021	0.0396	0.43889	0.84121	0.38861	0.36349	0.45516	0.21944	0.52958	0.48155	0.44039	0.3512	0.29107	0.59156	0.25834	0.59628	0.53757	0.75901	0.83642	0.1124	0.44109	0.13703	0.27134	0.24608	0.63588	0.09435	0.86498	0.03037	0.06688	0.05368	2.7643e-05
QTWT.CORE.6A	avgbs_424641.1.39	0.0678643	Mrg09	Chr7C	50.9	0.13332	0.86968	0.77075	0.0378	0.23888	0.95545	0.24935	0.61263	0.96474	0.36326	0.2572	0.42431	0.52957	0.18198	0.44409	0.38619	0.92135	0.07412	0.49235	0.41518	0.36269	0.7404	0.37897	0.74698	0.01713	0.09306	0.53313	0.28641	0.52028	0.13196	0.36862	0.27302	0.63793	0.82871	0.12233	0.33984	0.03837	0.33705	0.01762	0.92105	0.07671	0.08845	0.18604	0.00021481
QTWT.CORE.6A	avgbs_240219	0.011976				0.28121	0.63638	0.34961	0.77475	0.65487	0.12638	0.32919	0.00054745	0.10121	6.5188e-05	6.8157e-05	0.4248	0.00014832	0.93346	0.00673	0.74562	0.39404	0.1756	0.78479	0.89263	0.04379	0.93086	0.66497	0.60452	0.61976	0.43632	0.75772	0.43865	0.13229	0.97132	0.90717	0.88846	0.05397	0.52592	0.64517	0.71696	0.19612	0.54323	0.90539	0.86199	0.98058	0.62895	3.7618e-06	0.21795
QTWT.CORE.6A	avgbs_cluster_50608.1.42	0.0139721				0.18487	0.68026	0.33154	0.46262	0.41251	0.35557	0.30375	0.00396	0.00545	0.78526	0.34248	0.01528	0.00147	0.55607	0.04661	0.07979	0.15666	0.23342	0.00651	0.03157	0.04001	0.21367	0.08273	0.21138	0.22415	0.81927	0.08936	0.05852	0.32697	0.05123	0.00468	0.12794	0.07006	0.13916	0.02423	0.61015	0.04682	0.297	0.13581	0.79045	0.00296	0.02261	0.00544	0.60823
QTWT.CORE.6A	avgbs2_107660.1.59	0.0139721				0.04242	0.70627	0.10387	0.41024	0.7134	0.80704	0.84964	1.2025e-06	0.15457	0.76434	0.19807	0.0638	6.6291e-07	0.85927	0.59327	0.32705	0.38639	0.47884	0.23776	0.09738	0.21888	0.42689	0.20085	0.67017	0.10866	0.79402	0.27079	0.03816	0.62914	0.01677	0.29356	0.12473	0.14028	0.39555	0.86134	0.47397	0.75818	0.8208	0.86097	0.63164	0.55737	0.78292	8.8806e-08	0.30564
QTWT.CORE.6A	avgbs_117827.1.42	0.0179641				0.21897	0.60598	0.14381	0.51434	0.98373	0.7165	0.25147	1.0775e-05	0.03153	6.3706e-05	0.0483	0.40668	1.2813e-05	0.9806	0.06066	0.83505	0.46892	0.1315	0.91936	0.80877	0.10963	0.54979	0.80244	0.26581	0.99877	0.61037	0.55648	0.86831	0.83968	0.73329	0.98965	0.55231	0.10158	0.23507	0.35849	0.91508	0.63147	0.27012	0.84503	0.76186	0.37649	0.48683	5.2579e-06	0.4966
QTWT.CORE.6A	avgbs_cluster_12103.1.31	0.0219561				0.52556	0.03745	0.08514	0.46967	0.56474	0.16814	0.11097	0.00040325	0.53257	0.41012	0.00563	0.77336	6.3117e-05	0.62885	0.07207	0.38752	0.91879	0.99621	0.23749	0.35092	0.13618	0.36234	0.63303	0.44352	0.86548	0.81905	0.62324	0.28342	0.23713	0.51502	0.44045	0.5663	0.08394	0.3812	0.65254	0.86935	0.80526	0.04258	0.19456	0.68915	0.78524	0.20255	9.7836e-07	0.455
QTWT.CORE.6A	avgbs2_197778.1.24	0.0219561				0.01717	0.93178	0.03962	0.07416	0.41392	0.35363	0.15886	0.52068	0.02359	0.53306	0.80902	0.08497	0.56035	0.61073	0.25538	0.36429	0.64307	0.12258	0.78377	0.30783	0.039	0.81125	0.31918	0.3539	0.58417	0.04773	0.11923	0.35706	0.24635	0.48611	0.83975	0.27651	0.03106	0.93338	0.33104	0.55937	0.17701	0.35882	0.51472	0.99027	0.82197	0.09528	0.12417	0.21528
QTWT.CORE.6A	avgbs2_43159.2.8	0.0219561				0.05062	0.22487	0.35997	0.47181	0.0501	0.7765	0.99559	7.6628e-05	0.7242	0.7596	0.21102	0.52964	0.00010652	0.90644	0.9907	0.00843	0.69709	0.37742	0.01218	0.00481	0.13216	0.01062	0.02107	0.21792	0.03578	0.58134	0.01392	0.00641	0.35484	0.03902	0.0285	0.02958	0.1617	0.02294	0.05066	0.2218	0.32737	0.39695	0.1004	0.28485	0.06921	0.0433	2.6842e-06	0.94491
QTWT.CORE.6A	avgbs_54303.1.23	0.0239521				0.23073	0.30795	0.18105	0.73708	0.43258	0.33166	0.96777	0.64214	0.63325	0.77255	0.67769	0.40979	0.32279	0.7165	0.22694	0.37267	0.92563	0.80818	0.41905	0.21154	0.94553	0.29491	0.33419	0.79638	0.15311	0.58117	0.50644	0.22428	0.57559	0.27637	0.85579	0.29556	0.76642	0.42691	0.02864	0.24787	0.5771	0.59151	0.00457	0.15212	0.06484	0.0138	0.00237	5.5101e-05
QTWT.CORE.6A	avgbs_cluster_16827.1.29	0.0359281				0.04743	0.06652	0.15286	0.07098	0.1107	0.59549	0.21785	0.73266	0.13594	0.45733	0.61921	0.12198	0.69222	0.36562	0.85472	0.49274	0.73426	0.50593	0.43819	0.60303	0.89642	0.6208	0.27219	0.86551	0.18795	0.58424	0.46219	0.04631	0.61914	0.12383	0.23521	0.61037	0.77146	0.56683	0.02825	0.42035	0.10804	0.02494	0.00646	0.46205	0.08554	0.26354	0.17274	2.2967e-05
QTWT.CORE.6A	avgbs_79057.1.19	0.0499002				0.9137	0.87548	0.74841	0.16116	0.6103	0.92503	0.17404	0.95279	0.58571	0.93457	0.21086	0.31715	0.73768	0.40077	0.7126	0.00334	0.93941	0.03419	0.03416	0.01217	0.00617	0.00162	0.03676	0.74115	0.9328	0.08309	0.15599	0.33703	0.57135	0.93208	0.03424	0.00858	0.02229	0.00153	0.06563	0.1853	0.34608	0.54842	0.32655	0.88971	0.03323	0.01191	0.1318	0.00064329
QTWT.CORE.6A	avgbs_cluster_10284.1.30	0.167665				0.94599	0.46058	0.81236	0.24092	0.86101	0.51473	0.60234	0.04314	0.58617	0.09939	0.03192	0.26324	0.07558	0.77429	0.71974	0.06154	0.4578	0.1497	0.02088	0.1039	0.10663	0.22725	0.09199	0.73361	0.25674	0.46831	0.13191	0.09291	0.1771	0.50929	0.01706	0.21272	0.01567	0.44982	0.02397	0.94367	0.24895	0.1227	0.44394	0.27491	0.03094	0.01985	0.11055	0.01253
QTWT.CORE.6A	avgbs_64475.1.12	0.215569				0.5003	0.37545	0.62067	0.08551	0.95763	0.72652	0.73465	0.72344	0.28442	0.19992	0.45171	0.13671	0.88659	0.32893	0.78412	0.66877	0.9922	0.75941	0.57646	0.55356	0.49556	0.93742	0.24236	0.98109	0.00353	0.7757	0.37688	0.09144	0.43147	0.02526	0.40751	0.69329	0.56257	0.93612	0.04719	0.45287	0.2703	0.23105	0.04553	0.82738	0.02223	0.02308	0.05263	1.6045e-10
QTWT.CORE.6A	avgbs_48135.1.29	0.227545				0.41628	0.14568	0.99747	0.10368	0.97688	0.72161	0.76277	0.71875	0.56386	0.6652	0.59712	0.30352	0.86524	0.98054	0.67569	0.06826	0.68896	0.25099	0.20228	0.27845	0.21051	0.07127	0.03566	0.99341	0.00745	0.35556	0.19654	0.37424	0.51467	0.35543	0.10076	0.21053	0.08674	0.05881	0.04601	0.62274	0.24224	0.16659	0.06725	0.52019	0.01039	0.01831	0.01352	1.8243e-10
QTWT.CORE.6A	avgbs_cluster_6449.1.12	0.259481				0.69288	0.61692	0.67132	0.31716	0.41119	0.70248	0.45489	0.96368	0.53527	0.4576	0.97046	0.44029	0.97144	0.02378	0.1385	0.31773	9.4099e-08	0.66129	0.52329	0.16005	0.46219	0.55368	0.47987	0.72969	0.98443	0.58743	0.3368	0.38848	0.5118	0.96248	0.48551	0.20006	0.68039	0.86151	0.48762	0.92076	0.95171	0.49261	0.87894	0.22309	0.33073	0.28384	0.79458	0.97186
QTWT.Fargo11.2D.1	avgbs2_177572.1.31	0.0159681	Mrg08	Chr2D	142.3	0.5408	0.26095	0.69012	0.74704	0.02558	0.17299	0.53955	0.19438	0.0583	0.01342	0.000842	0.9824	0.05342	0.05637	0.04064	0.03211	0.67707	0.00484	0.1135	0.04696	0.37566	0.23003	0.24382	0.74101	0.26464	0.03857	0.00842	0.06096	0.34418	0.33799	0.90829	0.12793	0.62183	0.61044	0.02248	0.05507	0.00196	0.31111	0.15045	0.1968	0.16218	0.22206	0.13634	0.00393
QTWT.Fargo11.2D.1	avgbs2_77079.1.6	0.0259481	Mrg08	Chr2D	142.3	0.32335	0.10624	0.61471	0.23438	0.01869	0.27079	0.42881	0.42713	0.00332	0.0074	0.00795	0.35405	0.29575	0.05059	0.1339	0.00627	0.34609	0.00378	0.00725	0.01835	0.98026	0.1776	0.02797	0.79226	0.29921	0.08078	0.00028228	0.00421	0.182	0.26684	0.38639	0.0297	0.99233	0.44431	5.1562e-05	0.42499	1.203e-05	0.00751	0.0204	0.12899	0.00080505	0.00861	0.26032	0.05333
QTWT.Fargo11.2D.1	avgbs_cluster_39595.1.45	0.0139721				0.42824	0.11939	0.73165	0.58814	0.61926	0.46837	0.54993	0.13599	0.75646	0.03262	0.00313	0.01732	0.27352	0.02009	0.01754	0.20021	0.4768	0.12235	0.04557	0.26894	0.57982	0.32353	0.26856	0.51936	0.65851	0.01807	0.08946	0.43314	0.45242	0.66221	0.54785	0.13716	0.70829	0.34136	0.10585	0.06601	0.01386	0.21743	0.98247	0.59231	0.12059	0.0128	0.02523	0.00119
QTWT.Fargo11.2D.2	avgbs2_115576.1.14	0.0239521	Mrg08	Chr2D	142	0.554	0.2627	0.43246	0.17348	0.34879	0.23541	0.62081	0.97671	0.00247	0.01352	0.52911	0.57369	0.92756	0.17776	0.60451	0.0808	0.71183	0.06867	0.02229	0.24982	0.4369	0.96886	0.67405	0.58607	0.1865	0.61523	0.32465	0.6343	0.44851	0.08978	0.22779	0.36578	0.50813	0.97481	0.01555	0.93997	0.04085	0.53589	0.24816	0.0103	0.09534	0.87344	0.36275	0.0167
QTWT.Fargo11.7D	avgbs_cluster_1682.1.6	0.0439122	Mrg02	Chr7D	87.3	0.0158	0.46305	0.01832	0.83799	0.01304	0.72751	0.40823	0.54997	0.03917	0.509	0.50186	0.06185	0.77385	0.80822	0.38263	0.66657	0.44608	0.58156	0.56129	0.93936	0.74513	0.76877	0.82213	0.06213	0.41951	0.6641	0.92651	0.74321	0.58468	0.86239	0.70566	0.98538	0.60718	0.47481	0.89656	0.9183	0.69914	0.8096	0.64667	0.68275	0.38224	0.87686	0.32026	4.4156e-06
QTWT.Fargo11.Unk1	avgbs_216656.1.46	0.0918164	Mrg24	Chr5A	11.3	0.54843	0.14319	0.64303	0.87466	0.69721	0.1435	0.19053	0.93693	0.08307	0.65433	0.61475	0.3432	0.9348	0.25967	0.46962	0.47394	0.58961	0.90687	0.73358	0.52134	0.90793	0.28093	0.54192	0.62749	0.78469	0.78441	0.80839	0.78218	0.69817	0.51496	0.89487	0.35136	0.74977	0.04524	0.5765	0.05133	0.96532	0.93873	0.72823	0.08293	0.86316	0.75354	0.35267	0.11314
QTWT.Fargo11.Unk1	avgbs2_90296.1.12	0.0239521	Mrg24	Chr5A	21.5	0.60774	0.06291	0.96369	0.87846	0.05886	0.09002	0.01981	0.03181	0.38112	0.16648	0.98269	0.68364	0.0212	0.06533	0.06816	0.66866	0.59867	0.85001	0.93553	0.78116	0.06484	0.20013	0.69633	0.98757	0.1428	0.71299	0.68171	0.88013	0.49709	0.52849	0.9084	0.69776	0.27142	0.02487	0.30971	0.07515	0.99059	0.63393	0.92314	0.01378	0.88844	0.86827	0.16132	0.31481
QTWT.Fargo11.Unk1	avgbs2_68385.1.57	0.0439122	Mrg03	Chr5C	37.1	0.77631	0.04471	0.77312	0.95243	0.87969	0.12063	0.07186	0.94002	0.85148	0.24823	0.70149	0.9958	0.89571	0.18676	0.40021	0.6693	0.61481	0.73912	0.97072	0.69648	0.84675	0.34448	0.56306	0.90668	0.85108	0.71583	0.82172	0.92949	0.47824	0.60292	0.87513	0.51383	0.63803	0.03282	0.55185	0.03739	0.91621	0.61113	0.60631	0.06993	0.88674	0.78224	0.34222	0.29805
QTWT.Fargo11.Unk1	avgbs_24246.1.27	0.0199601	Mrg09	Chr7C	65.9	0.99533	0.12183	0.8405	0.45433	0.29404	0.20039	0.15424	0.93296	0.77002	0.3303	0.61617	0.96491	0.9184	0.16244	0.62524	0.76405	0.64697	0.72186	0.86487	0.75978	0.58959	0.38441	0.65529	0.95209	0.8105	0.74196	0.74964	0.94696	0.58317	0.50193	0.92714	0.62733	0.3311	0.07387	0.65269	0.07308	0.3215	0.38493	0.935	0.09973	0.9316	0.94799	0.48835	0.03518
QTWT.Fargo11.Unk1	avgbs_cluster_38430.1.49	0.0618762				0.21658	0.18148	0.36496	0.8945	0.00092243	0.25619	0.00522	0.4065	0.00242	0.99282	0.00314	0.65411	0.33978	0.24737	0.4876	0.50691	0.33009	0.479	0.55693	0.70696	0.81508	0.21494	0.8132	0.77574	0.60989	0.76965	0.53667	0.52846	0.97786	0.62086	0.88091	0.84817	0.6377	0.06408	0.8621	0.04527	0.37645	0.4148	0.33704	0.06038	0.8982	0.49034	0.40988	0.52196
QTWT.Fargo11.Unk1	avgbs_cluster_1407.1.32	0.0738523				0.0585	0.12151	0.00024639	0.97607	0.89572	0.02564	0.17509	0.83701	0.27636	0.70584	0.3557	0.54132	0.9431	0.11534	0.81014	0.20164	0.62967	0.33722	0.19369	0.0974	0.28642	0.13372	0.4102	0.74217	0.70252	0.59591	0.34346	0.63588	0.37868	0.50617	0.47649	0.24838	0.4849	0.02368	0.39398	0.02733	0.58962	0.7218	0.85521	0.07999	0.40341	0.05267	0.27127	0.2583
QTWT.Fargo11.Unk1	avgbs_76498.1.25	0.101796				0.07516	0.35261	0.20694	0.15159	0.00713	0.15096	0.35809	0.8158	0.00147	0.88658	0.02348	0.73354	0.66282	0.38318	0.86429	0.75564	0.37649	0.65596	0.91327	0.81971	0.68241	0.9623	0.82793	0.29753	0.91379	0.9053	0.63961	0.45778	0.922	0.50679	0.88023	0.85908	0.54709	0.57958	0.90519	0.42845	0.52634	0.81271	0.80394	0.04232	0.82436	0.92324	0.4425	0.13969
QTWT.Fargo11.Unk1	avgbs_cluster_12221.1.29	0.155689				0.96258	0.22454	0.93861	0.87555	0.59184	0.13324	0.17354	0.75527	0.63811	0.78053	0.9791	0.48799	0.73293	0.21026	0.20274	0.64752	0.56875	0.77614	0.70207	0.49844	0.74034	0.34486	0.59871	0.31159	0.94987	0.77161	0.56049	0.95285	0.65508	0.4668	0.72551	0.5817	0.50187	0.05059	0.26252	0.1257	0.7974	0.42714	0.47343	0.069	0.39575	0.60789	0.10873	0.32287
QTWT.Fargo11.Unk2	avgbs_288442	0.0279441				0.79359	0.51979	0.77077	0.40637	0.4985	0.33114	0.89686	0.5034	0.01458	0.141	0.39679	0.91993	0.56495	0.63799	0.73911	0.56368	0.60623	0.26684	0.50689	0.96213	0.01102	0.27028	0.21226	0.01766	0.22048	0.03273	0.31998	0.26266	0.04787	0.41406	0.25247	0.39805	0.02231	0.05592	0.02383	0.09813	0.01414	0.00961	0.57161	0.43945	0.04756	0.01009	0.06947	0.07757
QTWT.Fargo11.Unk3	avgbs_cluster_15112.1.10	0.0179641				0.41004	0.94556	0.63028	0.33598	0.20693	0.50198	0.01497	0.31099	0.62112	0.00214	0.94366	0.17176	0.46897	0.27517	0.271	0.67389	0.76343	0.17917	0.25746	0.33271	0.29082	0.37097	0.50872	0.20472	0.64245	0.19391	0.44698	0.22996	0.66617	0.46072	0.75259	0.19022	0.30472	0.3429	0.30862	0.48098	0.12672	0.53235	0.5641	0.7695	0.10365	0.18467	0.0656	0.05092
QTWT.Ithac11.Unk	avgbs_75885.1.16	0.38523				0.954	0.84437	0.40566	0.71479	0.56489	0.37157	0.84649	0.00010519	0.92725	0.77241	0.32121	0.44567	0.00010621	0.37059	0.38761	0.13253	0.53783	0.91633	0.12414	0.50819	0.7725	0.11429	0.3998	0.4321	0.80233	0.87507	0.57378	0.53895	0.54681	0.34199	0.26238	0.42817	0.71456	0.11742	0.55922	0.98057	0.17822	0.54264	0.22598	0.86697	0.37414	0.20006	0.00286	0.98107
QTWT.Ottaw10.Unk1	avgbs_413385.1.50	0.0399202				0.98032	0.14411	0.08313	0.55084	0.46488	0.33374	0.41328	0.14832	0.00028865	0.12326	0.00947	0.83862	0.00585	0.06159	0.35596	0.1882	0.331	0.09671	0.50874	0.06853	0.53032	0.21784	0.19665	0.02299	0.51611	0.23126	0.00492	0.58455	0.25804	0.12396	0.41909	0.1179	0.6464	0.31553	0.07149	0.77272	0.25682	0.35755	0.19541	0.19339	0.18634	0.00598	0.00010802	0.01784
QTWT.Ottaw10.Unk2	avgbs2_194643.1.18	0.0219561	Mrg18	Chr1A	2.5	0.14669	0.05503	0.53578	0.63426	0.03423	0.0837	0.62484	2.3949e-05	0.68945	0.50793	0.01994	0.0019	5.0075e-05	0.18671	0.19943	0.01706	0.36524	0.03267	0.00267	0.11943	0.0001133	0.16466	0.13065	0.14251	0.00054903	0.05614	0.31474	0.17789	0.04246	0.09218	0.00113	0.0061	0.00041951	0.09778	0.02647	0.65211	0.10924	0.54006	0.37691	0.15092	0.00707	0.0275	0.0007633	0.38757
QTWT.Ottaw10.Unk2	avgbs_cluster_28689.1.42	0.0339321	Mrg18	Chr1A	4.6	0.01859	0.15149	0.15488	0.69976	0.00201	0.02513	0.04895	0.00027644	0.96892	0.9581	0.87213	0.92258	0.0001928	0.19996	0.63558	0.01654	0.81193	0.02009	0.00312	0.11771	0.00115	0.08857	0.18059	0.86429	0.20951	0.03824	0.77998	0.124	0.12197	0.85112	0.0032	0.02507	0.00369	0.07475	0.16312	0.29418	0.09265	0.69305	0.49335	0.05602	0.05609	0.2267	0.00041144	0.94472
QTWT.Ottaw10.Unk2	avgbs2_433.1.45	0.0219561	Mrg18	Chr1A	4.7	0.04673	0.14074	0.43393	0.37713	0.01198	0.07676	0.70044	3.657e-05	0.6234	0.28616	0.81896	0.8965	6.7421e-05	0.18259	0.68029	0.00453	0.51214	0.01729	0.00063932	0.0404	5.6465e-05	0.05574	0.08971	0.96907	0.00175	0.01575	0.29659	0.18605	0.02895	0.47953	0.00016355	0.00302	0.00025606	0.03413	0.00855	0.66409	0.04176	0.30779	0.13143	0.1524	0.00218	0.00956	0.00015128	0.58118
QTWT.Ottaw10.Unk2	avgbs_34428	0.0239521	Mrg13	Chr2C	79.3	0.67514	0.62801	0.77443	0.8349	0.69457	0.68483	0.64816	0.04817	0.03199	0.07004	0.05542	0.00446	0.05924	0.44889	0.6795	0.85405	0.13651	0.80811	0.71334	0.71949	0.96048	0.82896	0.4523	0.80939	0.67811	0.61608	0.26002	0.41048	0.38546	0.17296	0.19724	0.49338	0.94357	0.50346	0.8223	0.38798	0.34997	0.59224	0.1865	0.92451	0.80935	0.73819	0.00014143	0.46073
QTWT.Sask11.Unk1	avgbs_201771.1.11	0.0199601	Mrg18	Chr1A	37.3	0.08279	0.92073	0.15542	0.13909	0.41435	0.40494	0.3061	0.50412	0.62013	0.53765	0.68495	0.22844	0.48318	0.4178	0.155	0.19501	0.07359	0.03114	0.00608	0.53991	0.29999	0.65605	0.83122	0.28784	0.35596	0.04372	0.66871	0.66498	0.53985	0.36853	0.61145	0.8608	0.35487	0.9017	0.58243	0.39324	0.13973	0.18894	0.78064	0.21665	0.38055	0.67348	0.16228	0.04993
QTWT.Sask11.Unk1	avgbs_38660.1.16	0.0239521	Mrg19	Chr3D	38	0.95948	0.63912	0.93825	0.40315	0.61197	0.33568	0.60347	0.04365	0.20308	0.65513	0.23998	0.10986	0.02607	0.7653	0.38703	0.40787	0.05635	0.44524	0.07832	0.43759	0.18819	0.8964	0.86286	0.84876	0.34038	0.7786	0.99501	0.69814	0.43985	0.40324	0.74933	0.86973	0.22594	0.74894	0.87195	0.35525	0.53328	0.99913	0.73351	0.26209	0.82191	0.52703	0.02275	0.69271
QTWT.Sask11.Unk1	avgbs2_169858.1.39	0.0379242	Mrg21	Chr4D	27.3	0.69661	0.24338	0.93099	0.70053	0.02689	0.87143	0.12478	0.00801	0.37106	0.44639	0.30678	0.02261	0.01283	0.49815	0.03415	0.13054	0.10258	0.00227	0.36897	0.40647	0.94343	0.28738	0.5333	0.26608	0.52775	0.02353	0.92847	0.46216	0.19297	0.19636	0.76037	0.39867	0.83933	0.35511	0.08721	0.57325	0.00328	0.08457	0.65897	0.12608	0.60806	0.13879	0.0419	0.6277
QTWT.Saska11.Unk2	avgbs2_104381.1.22	0.011976				0.96435	0.96082	0.64227	0.50672	0.98083	0.81004	0.07954	0.01658	0.07506	0.09096	0.09749	0.02988	0.00365	0.10825	0.07604	0.23633	0.06441	0.10281	0.06578	0.05151	0.40401	0.91609	0.26343	0.12479	0.21376	0.29871	0.07803	0.14674	0.44283	0.13597	0.08714	0.07163	0.4198	0.75445	0.98973	0.1181	0.74392	0.52976	0.95151	0.12838	0.26635	0.36529	0.05986	0.32413
QTWT.Saska11.Unk3	avgbs_32105.1.60	0.0179641				0.82354	0.64787	0.71555	0.1468	0.70924	0.71627	0.72438	0.0156	0.17347	0.03991	0.47303	0.28113	0.09973	0.01261	0.64922	0.24112	0.33273	0.18223	0.19646	0.15024	0.01131	0.15277	0.65366	0.94535	0.54766	0.16595	0.63579	0.74469	0.67871	0.34078	0.24789	0.24182	0.0207	0.19169	0.65826	0.99733	0.35458	0.27782	0.97377	0.68534	0.66504	0.73873	0.0135	0.04164
QTWT.Teton10.1D	avgbs2_80976.1.6	0.137725	Mrg01	Chr1D	118.9	0.00359	0.31631	0.20394	0.00813	0.01858	0.22211	0.00736	0.80869	0.98201	0.61266	0.88972	0.87009	0.70979	0.57365	0.32265	0.28989	0.80201	0.56657	0.39732	0.1184	0.22795	0.18655	0.50213	0.99663	0.48919	0.73335	0.16846	0.71507	0.59231	0.14393	0.41605	0.09177	0.43518	0.31551	0.69568	0.45037	0.69149	0.2423	0.76577	0.78778	0.98715	0.06232	0.66867	0.68183
QTWT.Teton10.Unk	avgbs2_93900.1.46	0.287425	Mrg15	Chr3C	3.3	0.37855	0.41766	0.97688	0.91034	0.6335	0.26304	0.30974	0.56462	0.12887	0.39873	0.39943	0.47046	0.62483	0.93433	0.05474	0.27345	0.47427	0.02006	0.31506	0.14598	0.42102	0.76577	0.37293	0.47202	0.50301	0.055	0.44061	0.10495	0.60912	0.40457	0.29952	0.17108	0.53187	0.83211	0.70965	0.67488	0.07392	0.69215	0.41115	0.58482	0.61177	0.07593	0.20516	0.14079
QTWT.Teton10.Unk	avgbs2_110501.1.21	0.143713	Mrg15	Chr3C	22.6	0.06409	0.95465	0.2703	0.51755	0.23487	0.37986	0.09451	0.48525	0.49361	0.89932	0.69361	0.46766	0.37529	0.57678	0.04814	0.76893	0.54413	0.20254	0.93623	0.45037	0.47497	0.87184	0.52018	0.19868	0.07096	0.49533	0.14853	0.78711	0.31612	0.01642	0.84193	0.13317	0.48229	0.8593	0.48129	0.92515	0.81632	0.39368	0.5122	0.67597	0.56659	0.04796	0.79126	0.35727
QTWT.Teton10.Unk	avgbs_cluster_3813.1.39	0.0259481	Mrg19	Chr3D	31.3	0.70211	0.95161	0.72256	0.18355	0.62365	0.68002	0.60984	0.45295	0.70085	0.10944	0.24929	0.92057	0.61834	0.29815	0.61232	0.04275	0.38621	0.00937	0.0584	0.11904	0.2633	0.18428	0.48816	0.78004	0.9644	0.21492	0.37309	0.25169	0.66668	0.37866	0.67428	0.68137	0.32572	0.63597	0.42158	0.39593	0.21739	0.4626	0.41381	0.46831	0.51795	0.59678	0.77861	0.57121
QTWT.Teton10.Unk	avgbs_cluster_30984.1.19	0.413174	Mrg19	Chr3D	66.2	0.56176	0.51482	0.59082	0.54596	0.04844	0.42307	0.19712	0.09062	0.03477	0.36066	0.61306	0.16928	0.04357	0.56137	0.18606	0.68682	0.00124	0.02944	0.84513	0.54937	0.67585	0.92205	0.72271	0.80096	0.49506	0.15137	0.24871	0.54847	0.89688	0.54989	0.57829	0.67436	0.77211	0.84759	0.9101	0.43039	0.57931	0.86559	0.78255	0.88876	0.37925	0.69187	0.06448	0.91217
QTWT.Teton10.Unk	avgbs2_46636.1.21	0.419162	Mrg20	Chr4A	192.4	0.04363	0.60587	0.22656	0.18223	0.04989	0.36852	0.68021	0.45207	0.8086	0.72873	0.6914	0.64755	0.53112	0.47449	0.68217	0.71875	0.88954	0.74293	0.60723	0.87349	0.35348	0.52181	0.65231	0.562	0.88888	0.85656	0.63371	0.59815	0.79349	0.97168	0.83277	0.81089	0.53054	0.68938	0.85568	0.91784	0.60287	0.98396	0.92962	0.90126	0.69574	0.81271	0.21873	0.85959
QTWT.Teton10.Unk	avgbs_406309.1.20	0.0339321	Mrg03	Chr5C	75.8	0.18873	0.55477	0.62859	0.10606	0.56034	0.80212	0.44278	0.69652	0.02998	0.77765	0.80639	0.32972	0.48072	0.32712	0.9151	0.76176	0.92027	0.25113	0.81338	0.9021	0.92404	0.69933	0.7247	0.99198	0.08905	0.08457	0.85414	0.5826	0.94468	0.63305	0.68316	0.7788	0.93498	0.68445	0.96511	0.55645	0.38151	0.77999	0.64967	0.62956	0.46976	0.94361	0.16742	0.58519
QTWT.Teton10.Unk	avgbs_230900.1.33	0.011976	Mrg06	Chr5D	101.6	0.98383	0.8835	0.61617	0.31444	0.2501	0.83461	0.12253	0.03166	0.00072434	0.58864	0.6101	0.01094	0.05045	0.29262	0.33366	0.11639	0.47514	0.3944	0.06741	0.16883	0.05105	0.03736	0.13289	0.6006	0.91752	0.24853	0.16179	0.084	0.10989	0.44809	0.07031	0.10568	0.18976	0.01025	0.00524	0.98523	0.01871	0.12571	0.09822	0.33408	0.00443	0.00421	0.83008	0.81406
QTWT.Teton10.Unk	avgbs_cluster_18979.1.31	0.0259481	Mrg05	Chr6A	147.6	0.22048	0.09738	0.86826	0.01078	0.3964	0.05608	0.31039	0.77564	0.22482	0.38795	0.816	0.58449	0.80572	0.40483	0.93908	0.10102	0.89642	0.41804	0.29243	0.09587	0.50087	0.09265	0.28425	0.8411	0.20852	0.32181	0.26887	0.82095	0.08669	0.48239	0.19672	0.03541	0.77006	0.11469	0.17837	0.35617	0.43837	0.4938	0.39294	0.24845	0.16628	0.21938	0.24621	0.38119
QTWT.Teton10.Unk	avgbs_16619.1.40	0.229541	Mrg09	Chr7C	61.8	0.91147	0.85043	0.94341	0.14534	0.24706	0.34487	0.23501	0.86733	0.64318	0.81903	0.70142	0.83158	0.95479	0.06219	0.89165	0.75111	0.85264	0.98738	0.86794	0.45671	0.52414	0.42812	0.62413	0.88513	0.13281	0.78224	0.84013	0.9684	0.2283	0.77749	0.90814	0.32029	0.40238	0.14304	0.99993	0.92608	0.68897	0.72423	0.60783	0.95091	0.83423	0.76195	0.82237	0.65907
QTWT.Teton10.Unk	avgbs2_152702.1.12	0.209581	Mrg02	Chr7D	34.1	0.21647	0.23943	0.20823	0.40087	0.53478	0.59764	0.06758	0.05832	0.86497	0.18739	0.15358	0.65164	0.13739	0.56855	0.02123	0.42461	0.77853	0.64805	0.81095	0.24783	0.03962	0.38071	0.42383	0.21637	0.15491	0.78808	0.08083	0.80703	0.21825	0.05361	0.97502	0.1597	0.19535	0.86713	0.4126	0.91761	0.83719	0.20232	0.27274	0.62251	0.63189	0.08412	0.43007	0.22337
QTWT.Teton10.Unk	avgbs2_40507.1.63	0.0159681				0.07329	0.6586	0.21479	0.45782	0.66585	0.21447	0.06995	0.32289	0.44547	0.58949	0.07345	0.84394	0.30204	0.31134	0.00126	0.75921	0.61928	0.2507	0.56824	0.41454	0.64213	0.92623	0.57706	0.13827	0.48171	0.25124	0.10214	0.66043	0.40508	0.04806	0.61243	0.05768	0.86371	0.90432	0.17966	0.94673	0.16017	0.3353	0.43856	0.38669	0.20517	0.05591	0.48697	0.29734
QTWT.Teton10.Unk	avgbs_cluster_361.1.28	0.0359281				0.01382	0.65172	0.14464	0.37753	0.15186	0.20828	0.01582	0.60925	0.94821	0.73261	0.33736	0.10663	0.48362	0.05605	0.01082	0.53096	0.68255	0.58643	0.93082	0.20396	0.77623	0.28156	0.18217	0.17654	0.03323	0.3593	0.12879	0.82713	0.14844	0.03045	0.89458	0.0427	0.79871	0.12045	0.60066	0.00601	0.93267	0.3383	0.5141	0.26379	0.61798	0.03713	0.18486	0.30791
QTWT.Teton10.Unk	avgbs2_130697.1.9	0.0379242				0.10791	0.26931	0.35258	0.41449	0.08039	0.31335	0.12829	0.13122	0.02931	0.93304	0.22856	0.57094	0.0868	0.39458	0.02503	0.0974	0.07956	0.13801	0.39861	0.00709	0.74596	0.43693	0.09582	0.06034	0.42377	0.07868	0.01332	0.09934	0.15748	0.00316	0.56497	0.00312	0.54529	0.68063	0.21876	0.18284	0.28771	0.12856	0.27874	0.38799	0.33759	0.01757	0.14343	0.34139
QTWT.Teton10.Unk	avgbs_41737.1.17	0.0439122				0.27453	0.48218	0.70897	0.54575	0.90431	0.55024	0.13523	0.62559	0.83829	0.88162	0.71395	0.65207	0.76975	0.73416	0.06685	0.77848	0.88043	0.64897	0.79512	0.36186	0.69678	0.67427	0.61996	0.01363	0.2294	0.57829	0.0962	0.57605	0.38768	0.07128	0.56545	0.09211	0.81886	0.90808	0.56012	0.80442	0.48855	0.17371	0.39403	0.60914	0.54579	0.05779	0.32926	0.15168
QTWT.Teton10.Unk	avgbs_20664.1.31	0.0538922				0.13701	0.46156	0.25998	0.25279	0.26495	0.08304	0.01623	0.01764	0.96346	0.30349	0.00241	0.26052	0.01079	0.15475	0.06401	0.52202	0.93362	0.26506	0.16393	0.60198	0.21868	0.60709	0.55367	0.83641	0.62745	0.11699	0.32854	0.54763	0.4562	0.67631	0.32993	0.52331	0.09093	0.373	0.96968	0.71754	0.08518	0.70633	0.50249	0.5236	0.6639	0.48407	0.01177	0.89715
QTWT.Teton11.7A	avgbs_99656.1.17	0.269461	Mrg12	Chr7A	36.3	0.57112	0.55598	0.54388	0.75335	0.82778	0.70044	0.69661	0.00018261	0.42442	0.86078	0.78376	0.59951	0.00010211	0.30608	0.31773	0.12014	0.70058	0.78451	0.02523	0.31497	0.00605	0.63015	0.16432	0.2378	0.15485	0.39822	0.3223	0.34569	0.38693	0.86449	0.03382	0.3093	0.01089	0.64036	0.57636	0.00265	0.17957	0.84578	0.40493	0.1542	0.18066	0.63013	1.8309e-05	0.9632
QvarGC.CORE.3D.1	avgbs_cluster_39255.1.44	0.141717	Mrg18	Chr1A	44	0.78279	0.40648	0.3735	0.34412	0.9598	0.92349	0.81572	0.13753	0.04889	0.00646	0.88945	0.26314	0.13628	0.54875	0.60493	0.66762	0.82369	0.4844	0.50835	0.46375	0.6664	0.8189	0.38897	0.75303	0.11234	0.51236	0.19801	0.08701	0.26471	0.04451	0.27298	0.42028	0.61835	0.70829	0.84259	0.02292	0.37275	0.57929	0.36828	0.33744	0.44865	0.36321	0.0005532	3.0711e-05
QvarGC.CORE.3D.1	avgbs_223688.1.54	0.0479042	Mrg28	Chr1C	43.8	0.69563	0.30801	0.68017	0.41485	0.97545	0.22815	0.80546	0.18956	0.28078	0.02059	0.59759	0.13468	0.22578	0.40939	0.59444	0.69063	0.26848	0.87214	0.6259	0.46365	0.62681	0.65406	0.46284	0.44992	0.64421	0.562	0.28806	0.73223	0.62128	0.40805	0.67954	0.40131	0.61277	0.50417	0.53053	0.07302	0.56183	0.5442	0.03582	0.38787	0.6365	0.06824	0.02949	0.03474
QvarGC.CORE.3D.1	avgbs_2929.1.11	0.00998004	Mrg28	Chr1C	43.9	0.4338	0.79391	0.10255	0.90179	0.60053	0.8463	0.79611	0.45901	0.5779	0.33498	0.24304	0.80377	0.87489	0.24578	0.53583	0.47952	0.7229	0.2371	0.09243	0.75642	0.92708	0.41083	0.38099	0.22003	0.30734	0.28181	0.21242	0.39895	0.5864	0.02319	0.17957	0.88897	0.72226	0.52072	0.29054	0.83981	0.03751	0.42077	0.66823	0.20039	0.24764	0.70646	0.10308	0.38956
QvarGC.CORE.3D.1	avgbs2_185206.1.51	0.0139721	Mrg01	Chr1D	74.8	0.79635	0.64691	0.90273	0.37946	0.63464	0.74891	0.07569	0.83516	0.83812	0.48506	0.15096	0.27882	0.89397	0.9358	0.74961	0.22155	0.97549	0.04936	0.10899	0.21535	0.54908	0.41367	0.09884	0.09062	0.3359	0.01885	0.08946	0.04166	0.09869	0.0007892	0.07619	0.10019	0.68279	0.45245	0.69706	0.59208	0.28264	0.62255	0.86235	0.71214	0.42268	0.866	0.04136	0.15841
QvarGC.CORE.3D.1	avgbs_21146.1.38	0.0698603	Mrg01	Chr1D	77.4	0.52128	0.34651	0.73573	0.08672	0.20407	0.78272	0.21505	0.9736	0.89697	0.23937	0.41855	0.52673	0.99382	0.40868	0.73037	0.33214	0.94754	0.29387	0.75677	0.21744	0.32461	0.66143	0.22395	0.30547	0.04894	0.64053	0.60837	0.37815	0.12917	0.09003	0.80552	0.1481	0.38999	0.41752	0.17463	0.65282	0.08666	0.31158	0.25194	0.95461	0.41752	0.20123	0.5145	0.27059
QvarGC.CORE.3D.1	avgbs2_74131.1.12	0.217565	Mrg01	Chr1D	109	0.842	0.28574	0.36117	0.37871	0.93312	0.8161	0.74296	0.12133	0.03792	0.00286	0.95572	0.18124	0.13753	0.35305	0.82465	0.28884	0.70008	0.23555	0.19477	0.26439	0.62173	0.47136	0.20946	0.51716	0.87403	0.41719	0.10244	0.0534	0.31012	0.0211	0.19701	0.31284	0.52565	0.42192	0.62019	0.02251	0.42579	0.51561	0.25363	0.47284	0.37981	0.21069	0.0013	0.00011358
QvarGC.CORE.3D.1	avgbs2_39967.1.40	0.143713	Mrg01	Chr1D	110.8	0.96004	0.28434	0.22227	0.49893	0.98529	0.61673	0.52106	0.77483	0.0661	0.00648	0.51354	0.04824	0.92572	0.21609	0.39224	0.08137	0.65558	0.38246	0.04824	0.15754	0.06372	0.15204	0.05609	0.20237	0.62458	0.31476	0.0419	0.06431	0.09415	0.0875	0.04011	0.05568	0.06618	0.12099	0.6024	0.00286	0.07387	0.88909	0.31666	0.22234	0.10624	0.24784	0.70907	0.00301
QvarGC.CORE.3D.1	avgbs_cluster_44941.1.41	0.0339321	Mrg33	Chr2A	59	0.29477	0.42025	0.28878	0.40836	0.39986	0.72639	0.4602	0.36025	0.08232	0.01351	0.838	0.32044	0.37283	0.37704	0.84204	0.14037	0.59349	0.18563	0.10028	0.10268	0.64268	0.3361	0.05854	0.3441	0.17489	0.29144	0.03556	0.04056	0.08203	0.02887	0.11193	0.13347	0.6215	0.23955	0.58029	0.01389	0.49833	0.58354	0.20909	0.27992	0.22989	0.16152	0.00446	0.00026264
QvarGC.CORE.3D.1	avgbs2_12731.1.41	0.0658683	Mrg33	Chr2A	59	0.236	0.18684	0.77082	0.19205	0.40629	0.32164	0.15413	0.82681	0.1162	0.02783	0.5699	0.99516	0.79072	0.47373	0.63699	0.36574	0.74653	0.3192	0.49801	0.34849	0.68448	0.29077	0.27772	0.44234	0.22016	0.29042	0.18602	0.09696	0.12005	0.00625	0.61088	0.33357	0.66468	0.19498	0.74961	0.38519	0.53443	0.74387	0.42159	0.40719	0.90399	0.41466	0.10776	0.05923
QvarGC.CORE.3D.1	avgbs2_180071.1.46	0.0718563	Mrg33	Chr2A	65.9	0.11299	0.91438	0.07419	0.13339	0.43017	0.82393	0.85122	0.61106	0.18197	0.03307	0.52233	0.10416	0.71754	0.31037	0.40531	0.0909	0.20939	0.26209	0.05955	0.08737	0.6576	0.22553	0.18063	0.59125	0.3837	0.12279	0.17026	0.44703	0.79792	0.17227	0.00926	0.08012	0.66452	0.15634	0.42137	0.00803	0.18345	0.20838	0.55452	0.05909	0.17307	0.18745	0.40909	0.01319
QvarGC.CORE.3D.1	avgbs_44027.1.14	0.127745	Mrg33	Chr2A	75.4	0.88184	0.33962	0.87246	0.5511	0.62866	0.31533	0.9534	0.15179	0.27534	0.0749	0.56635	0.42886	0.0784	0.10065	0.93933	0.74516	0.03803	0.83458	0.81464	0.11203	0.9943	0.61089	0.75187	0.73721	0.84121	0.84853	0.33575	0.83705	0.82375	0.9689	0.66521	0.34767	0.98806	0.49874	0.91043	0.15417	0.38769	0.99019	0.24336	0.15361	0.58387	0.20694	0.02321	0.02646
QvarGC.CORE.3D.1	avgbs_cluster_11206.1.8	0.0159681	Mrg13	Chr2C	29.7	0.22572	0.37349	0.14726	0.19217	0.36141	0.69249	0.97539	0.18706	0.08043	0.02425	0.78111	0.17001	0.1968	0.41616	0.99604	0.5556	0.71464	0.41185	0.28198	0.46445	0.60738	0.46128	0.48909	0.62008	0.99407	0.23596	0.23904	0.11804	0.29259	0.07081	0.13299	0.42819	0.38802	0.40054	0.93848	0.03083	0.22153	0.91841	0.38625	0.26413	0.40339	0.28625	0.00022004	0.00016836
QvarGC.CORE.3D.1	avgbs_39066.1.26	0.0738523	Mrg13	Chr2C	35.9	0.23801	0.45931	0.01012	0.42472	0.65454	0.11651	0.74132	0.04097	0.07509	0.01761	0.56657	0.10608	0.03337	0.225	0.3785	0.75886	0.65239	0.37021	0.49749	0.4834	0.83149	0.6064	0.46545	0.66229	0.58676	0.25676	0.15444	0.10846	0.25126	0.14488	0.2977	0.49554	0.72035	0.6388	0.80047	0.02327	0.75773	0.33699	0.24345	0.28939	0.50575	0.3814	0.00201	0.0002821
QvarGC.CORE.3D.1	avgbs_cluster_37037.1.49	0.0479042	Mrg13	Chr2C	36.7	0.79246	0.38801	0.8575	0.3909	0.39623	0.13011	0.15645	0.71847	0.10141	0.56744	0.03455	0.60874	0.48203	0.35837	0.0218	0.1376	0.7299	0.02222	0.33996	0.16795	0.86961	0.07594	0.03073	0.3368	0.11253	0.04923	0.00894	0.00255	0.2005	0.00168	0.14971	0.08586	0.50021	0.052	0.22455	0.06174	0.06807	0.57933	0.17113	0.27936	0.20669	0.08676	0.20598	0.00516
QvarGC.CORE.3D.1	avgbs_cluster_3478.1.63	0.0379242	Mrg13	Chr2C	42.1	0.96228	0.50896	0.86484	0.69457	0.62961	0.72462	0.95193	0.70086	0.04743	0.17834	0.73173	0.97677	0.53305	0.65301	0.31995	0.8523	0.47198	0.5641	0.8552	0.68671	0.43016	0.40351	0.55952	0.56366	0.36503	0.29868	0.1505	0.1558	0.74732	0.41174	0.53244	0.89755	0.14476	0.32776	0.92325	0.08286	0.20702	0.91265	0.49833	0.08782	0.84051	0.43071	0.15292	0.02349
QvarGC.CORE.3D.1	avgbs_33075.1.15	0.209581	Mrg13	Chr2C	66.4	0.01245	0.06645	0.35568	0.01884	0.1425	0.90619	0.00085493	0.77601	0.38792	0.03815	0.62383	0.55619	0.93714	0.63381	0.96106	0.69419	0.67415	0.58613	0.55261	0.5912	0.48687	0.7665	0.22604	0.81342	0.62093	0.33606	0.55644	0.06339	0.16865	0.20683	0.1293	0.41781	0.51208	0.47392	0.02913	0.24275	0.0813	0.0171	0.02771	0.2333	0.10006	0.04467	0.10356	0.01566
QvarGC.CORE.3D.1	avgbs2_136268.1.8	0.159681	Mrg13	Chr2C	73.6	0.62417	0.4053	0.47869	0.17671	0.94337	0.59931	0.97678	0.26085	0.03135	0.01541	0.76705	0.27081	0.28651	0.55642	0.88364	0.52505	0.89384	0.37365	0.35603	0.34723	0.75948	0.78716	0.28906	0.76473	0.43923	0.23555	0.19495	0.07454	0.12512	0.01796	0.28405	0.38147	0.77592	0.6877	0.62337	0.01427	0.58509	0.88537	0.12438	0.36708	0.52717	0.32533	0.00264	0.00046254
QvarGC.CORE.3D.1	avgbs_14460.1.25	0.0159681	Mrg13	Chr2C	74.1	0.49042	0.19465	0.18231	0.78218	0.26834	0.79095	0.53635	0.17413	0.89392	0.18153	0.15742	0.27078	0.34049	0.52285	0.96407	0.81725	0.44652	0.31164	0.88463	0.41276	0.81089	0.99792	0.92017	0.94623	0.49592	0.11202	0.32898	0.60322	0.9452	0.15512	0.54384	0.80034	0.84538	0.6613	0.71729	0.38905	0.23895	0.60269	0.50444	0.68886	0.73578	0.99335	0.03176	0.27288
QvarGC.CORE.3D.1	avgbs2_63422.1.7	0.0159681	Mrg13	Chr2C	74.1	0.80808	0.21248	0.13463	0.84189	0.6522	0.7847	0.62493	0.30667	0.81786	0.07021	0.14936	0.30659	0.35996	0.43063	0.9349	0.32118	0.37126	0.6505	0.10742	0.27908	0.81144	0.49017	0.07678	0.00358	0.21161	0.13304	0.04268	0.13289	0.03194	0.12031	0.01394	0.55991	0.87435	0.57849	0.06127	0.27373	0.68491	0.00854	0.02577	0.78353	0.01361	0.21859	0.01629	0.51768
QvarGC.CORE.3D.1	avgbs_77936.1.33	0.0259481	Mrg13	Chr2C	79.2	0.69248	0.76139	0.41061	0.78589	0.76072	0.88453	0.60914	0.06286	0.01063	0.0457	0.07569	0.00236	0.103	0.37441	0.85378	0.96137	0.12449	0.98163	0.97185	0.97746	0.73209	0.9567	0.82756	0.60508	0.92613	0.40973	0.58373	0.80272	0.82398	0.36405	0.56955	0.46241	0.52124	0.81793	0.86587	0.41075	0.39263	0.65776	0.20564	0.99532	0.95543	0.96052	8.4465e-05	0.54702
QvarGC.CORE.3D.1	avgbs_cluster_4248.1.12	0.0219561	Mrg13	Chr2C	79.6	0.99201	0.72657	0.79367	0.98987	0.99621	0.92164	0.55282	0.06629	0.00536	0.05504	0.1387	0.00161	0.1166	0.41863	0.82072	0.87287	0.21926	0.88109	0.8572	0.71638	0.83289	0.87315	0.75279	0.79221	0.82534	0.50053	0.56284	0.76642	0.81379	0.60291	0.3164	0.24587	0.78747	0.68805	0.8587	0.43614	0.56993	0.97597	0.14986	0.98851	0.80794	0.71265	0.00010224	0.47455
QvarGC.CORE.3D.1	avgbs2_11185.1.8	0.0219561	Mrg13	Chr2C	79.6	0.91876	0.67369	0.71153	0.42479	0.75156	0.81548	0.47377	0.04856	0.00177	0.04892	0.13243	0.00086767	0.07086	0.52419	0.83268	0.51324	0.18133	0.27268	0.87668	0.31445	0.70698	0.78296	0.39007	0.67768	0.90964	0.07177	0.27412	0.32896	0.22293	0.4376	0.51505	0.23717	0.7396	0.79775	0.71745	0.46461	0.46328	0.85652	0.11063	0.96796	0.81447	0.87911	1.7777e-05	0.30827
QvarGC.CORE.3D.1	avgbs2_52986.1.20	0.0199601	Mrg13	Chr2C	100.5	0.89529	0.51092	0.57512	0.86072	0.84984	0.70507	0.51436	0.01794	0.0019	0.01617	0.04096	0.00035804	0.03137	0.36374	0.49147	0.84396	0.09364	0.91604	0.60608	0.65937	0.88157	0.79286	0.49669	0.59371	0.72426	0.45399	0.23613	0.41913	0.58854	0.19687	0.20876	0.48441	0.94858	0.5469	0.76508	0.13685	0.22712	0.92194	0.14701	0.99082	0.88572	0.64497	4.2094e-05	0.28529
QvarGC.CORE.3D.1	avgbs_cluster_26145.1.28	0.173653	Mrg23	Chr3A	57.8	0.39425	0.97905	0.76599	0.39873	0.48666	0.02815	0.58867	0.87669	0.07003	0.3413	0.78803	0.32031	0.61938	0.44894	0.23247	0.09013	0.28847	0.10466	0.0277	0.08317	0.13886	0.08109	0.00723	0.12414	0.07387	0.01468	0.00569	0.00119	0.02531	0.00103	0.00178	0.08833	0.07569	0.03378	0.16375	0.03576	0.03381	0.03452	0.2217	0.31992	0.0714	0.13944	0.16972	0.01504
QvarGC.CORE.3D.1	avgbs_101742.1.28	0.217565	Mrg23	Chr3A	57.8	0.06003	0.66173	0.63511	0.17049	0.02286	0.03597	0.10851	0.02241	0.19262	0.00616	0.49494	0.0901	0.03824	0.46806	0.41796	0.0022	0.27807	0.00147	0.00152	0.0022	0.04021	0.01559	0.01096	0.02884	0.25666	0.0016	0.02209	0.0042	0.07611	0.10966	0.00174	0.03509	0.10518	0.08036	0.08467	0.09264	0.01976	0.06799	0.17473	0.27503	0.02737	0.05516	0.00040756	0.02795
QvarGC.CORE.3D.1	avgbs2_166242.1.13	0.131737	Mrg15	Chr3C	32.7	0.41165	0.08093	0.81365	0.44229	0.31472	0.21764	0.48314	0.41789	2.7983e-05	0.0015	0.08657	0.73939	0.73481	0.06838	0.53841	0.25638	0.63147	0.24181	0.34839	0.38345	0.47492	0.36997	0.14393	0.34182	0.80819	0.49182	0.19407	0.08962	0.28869	0.31536	0.17122	0.35358	0.47391	0.22749	0.26584	0.8949	0.34676	0.66837	0.03272	0.82751	0.34251	0.37815	0.04668	0.09897
QvarGC.CORE.3D.1	avgbs_85571.1.14	0.0339321	Mrg19	Chr3D	45.3	0.03302	0.83539	0.4747	0.06921	0.00787	0.29301	0.23834	0.50792	0.00061134	0.01121	0.82634	0.30472	0.26513	0.20151	0.65042	0.31633	0.54081	0.23503	0.79713	0.20127	0.53177	0.17105	0.19468	0.73983	0.49404	0.6093	0.08327	0.04713	0.50372	0.05699	0.49572	0.07222	0.35695	0.12607	0.04727	0.16144	0.03774	0.02232	0.37618	0.4884	0.23681	0.18462	0.10278	0.53599
QvarGC.CORE.3D.1	avgbs_8135.1.14	0.0159681	Mrg19	Chr3D	45.4	0.00034068	0.90105	0.12146	0.00829	3.8736e-05	0.27709	0.06663	0.01077	8.4074e-08	0.04932	5.763e-05	0.01487	0.00062352	0.08875	0.54828	0.19653	0.48203	0.55763	0.27926	0.07565	0.88825	0.40072	0.07592	0.19082	0.94935	0.37727	0.06369	0.01842	0.1638	0.06596	0.11614	0.06522	0.91689	0.43906	0.11735	0.22694	0.50503	0.02637	0.32375	0.52584	0.24467	0.14758	2.7332e-05	0.13727
QvarGC.CORE.3D.1	avgbs_cluster_31272.1.14	0.0159681	Mrg19	Chr3D	45.4	0.14589	0.69551	0.80461	0.094	0.02958	0.38502	0.98418	0.21528	0.00123	0.05892	0.00413	0.93661	0.72866	0.21115	0.95248	0.00553	0.5362	0.00715	0.04504	0.01587	0.00289	0.01533	0.00203	0.19537	0.37806	0.04004	8.4627e-05	0.01693	0.00105	0.02914	0.02338	0.00384	0.01137	0.0185	0.00211	0.03255	0.02592	0.00171	0.01037	0.7464	0.04183	0.02259	0.58714	0.09904
QvarGC.CORE.3D.1	avgbs2_136032.1.10	0.0199601	Mrg19	Chr3D	45.4	0.03727	0.76047	0.86221	0.0393	0.00635	0.42428	0.82707	0.92513	1.3678e-07	0.01122	0.01048	0.09507	0.33693	0.37827	0.56497	0.00266	0.25648	0.00725	0.00896	0.00271	0.01241	0.0124	0.00042823	0.15708	0.38696	0.02004	4.8949e-05	0.00033753	0.00192	0.00473	0.00415	0.00049843	0.02614	0.01457	0.00122	0.09813	0.03929	0.00033416	0.01501	0.44993	0.00967	0.01001	0.0114	0.09733
QvarGC.CORE.3D.1	avgbs_104591.1.37	0.0219561	Mrg19	Chr3D	45.4	0.7577	0.85711	0.34314	0.71205	0.1513	0.8865	0.81955	0.17175	1.6501e-05	0.12342	0.00926	0.07983	0.17049	0.32321	0.59863	0.00827	0.53917	0.02021	0.04198	0.05767	0.00494	0.04519	0.00541	0.73269	0.77672	0.03482	0.00197	0.01244	0.03687	0.11748	0.05552	0.01268	0.00738	0.02597	0.05138	0.08107	0.01777	0.05883	0.31922	0.76358	0.06307	0.08163	0.00013079	0.22845
QvarGC.CORE.3D.1	avgbs_12225.1.17	0.0239521	Mrg19	Chr3D	45.4	0.26502	0.53628	0.49813	0.85769	0.03671	0.39667	0.4817	0.16199	2.2061e-06	0.13911	0.02432	0.05913	0.03968	0.16951	0.96385	0.41364	0.7933	0.59935	0.56127	0.50791	0.624	0.86275	0.20827	0.85603	0.96139	0.33993	0.1105	0.06618	0.51833	0.18691	0.46428	0.24792	0.47394	0.69788	0.22525	0.20289	0.65926	0.05073	0.8248	0.15904	0.67026	0.84698	0.01356	0.41322
QvarGC.CORE.3D.1	avgbs_cluster_48602.1.38	0.0279441	Mrg19	Chr3D	45.4	0.43621	0.88137	0.24331	0.20025	0.09644	0.78911	0.99822	0.28481	1.1616e-07	0.00063208	0.11294	0.11386	0.12758	0.58876	0.75208	0.01986	0.63991	0.07505	0.02706	0.03521	0.02231	0.05461	0.00731	0.43644	0.5697	0.21025	0.00296	0.00519	0.02503	0.03727	0.05971	0.01244	0.03842	0.0423	0.02778	0.42153	0.18112	0.02352	0.26987	0.8458	0.04238	0.07215	0.01345	0.42113
QvarGC.CORE.3D.1	avgbs_424816.1.58	0.0299401	Mrg19	Chr3D	45.4	0.04599	0.97567	0.2252	0.16402	0.05711	0.71459	0.47276	0.94967	0.00061057	0.06358	0.01366	0.41164	0.2931	0.44162	0.97032	0.03369	0.50379	0.05274	0.14665	0.07075	0.07028	0.04853	0.02541	0.85846	0.61267	0.07576	0.02368	0.06719	0.19085	0.11901	0.15987	0.04685	0.09502	0.02058	0.04046	0.26525	0.11476	0.06822	0.30501	0.84456	0.11955	0.06834	0.17149	0.33998
QvarGC.CORE.3D.1	avgbs_118478.1.54	0.0319361	Mrg19	Chr3D	45.4	0.09617	0.94205	0.63234	0.27222	0.1159	0.74897	0.55816	0.83898	0.00059287	0.1738	0.34305	0.58106	0.2193	0.51782	0.90827	0.26373	0.48126	0.23191	0.80624	0.07359	0.64242	0.30188	0.09755	0.72308	0.44646	0.40743	0.09826	0.03481	0.38468	0.06556	0.59336	0.06292	0.56063	0.14303	0.07173	0.17562	0.19035	0.05635	0.4071	0.57435	0.32508	0.0665	0.02966	0.71349
QvarGC.CORE.3D.1	avgbs_73073.1.22	0.0339321	Mrg19	Chr3D	45.4	0.03647	0.75421	0.89113	0.06757	0.00717	0.38609	0.65584	0.50731	1.2051e-06	0.0358	0.24727	0.05308	0.16045	0.15371	0.47842	0.26164	0.91893	0.23334	0.65478	0.12379	0.88155	0.16167	0.08042	0.36019	0.28987	0.42463	0.01195	0.04186	0.25533	0.02812	0.31763	0.05282	0.90222	0.13719	0.03661	0.16609	0.06216	0.02262	0.24948	0.76376	0.11499	0.14049	0.01987	0.85871
QvarGC.CORE.3D.1	avgbs_cluster_22727.1.27	0.0239521	Mrg19	Chr3D	47	0.08592	0.28435	0.78558	0.00663	0.01048	0.43126	0.87789	0.83362	6.4662e-08	0.02803	0.02744	0.08991	0.35394	0.58781	0.40397	0.01562	0.50132	0.03656	0.05787	0.01041	0.03193	0.05885	0.00342	0.20405	0.5736	0.07299	0.00033057	0.00184	0.00708	0.00854	0.01794	0.00216	0.04788	0.03126	0.00422	0.06158	0.06229	0.00117	0.02248	0.69201	0.03129	0.02931	0.0196	0.15532
QvarGC.CORE.3D.1	avgbs2_711.1.21	0.0259481	Mrg19	Chr3D	47.6	0.00043447	0.67191	0.12893	0.00032175	0.00072854	0.60122	0.10103	0.52712	1.4882e-05	0.00857	0.0049	0.11362	0.12015	0.49589	0.58613	0.00945	0.17029	0.03214	0.03624	0.00697	0.04433	0.01897	0.00369	0.12028	0.42101	0.0182	0.00308	0.00138	0.00753	0.01377	0.01967	0.00676	0.08874	0.02019	0.0021	0.05011	0.02769	0.00050791	0.02155	0.85096	0.00937	0.00426	0.0034	0.18188
QvarGC.CORE.3D.1	avgbs2_165377.1.38	0.105788	Mrg19	Chr3D	64.1	0.92393	0.35101	0.45831	0.36243	0.90617	0.47619	0.78848	0.0661	0.07053	0.01429	0.38461	0.10997	0.14541	0.37229	0.05366	0.02206	0.80131	0.01526	0.02126	0.04118	0.05851	0.0856	0.04651	0.5467	0.88557	0.02163	0.03938	0.02182	0.05077	0.04652	0.12136	0.09748	0.1301	0.15721	0.11969	0.00958	0.25566	0.09609	0.20809	0.1982	0.09577	0.07532	0.00239	0.00049193
QvarGC.CORE.3D.1	avgbs_cluster_20673.1.56	0.0179641	Mrg20	Chr4A	18	0.03334	0.58519	0.76999	0.2107	0.00967	0.18585	0.00333	0.00879	0.42716	0.22902	0.77395	0.03323	0.00482	0.15669	0.15958	0.17868	0.38579	0.14003	0.25902	0.20973	0.91956	0.07527	0.23209	0.70591	0.69155	0.3327	0.10001	0.01759	0.35489	0.03112	0.40063	0.42951	0.89864	0.18124	0.23676	0.10601	0.11893	0.53276	0.57754	0.85959	0.22276	0.02936	2.0407e-06	0.0002025
QvarGC.CORE.3D.1	avgbs_86886.1.27	0.0738523	Mrg20	Chr4A	187.2	0.80463	0.88997	0.9037	0.94249	0.28943	0.78961	0.83955	0.08801	0.04066	0.56274	0.06873	0.72594	0.19575	0.02585	0.1254	0.94152	0.25636	0.64231	0.92074	0.57365	0.9072	0.99557	0.93466	0.05035	0.88011	0.86695	0.52355	0.65998	0.57382	0.79491	0.31071	0.45942	0.43073	0.92693	0.86009	0.06446	0.92754	0.61929	0.72892	0.06808	0.93718	0.64138	0.02114	0.01572
QvarGC.CORE.3D.1	avgbs_cluster_4352.1.12	0.0199601	Mrg11	Chr4C	22.3	0.4592	0.1267	0.02928	0.69736	0.27112	0.45557	0.35583	0.60033	0.16179	0.09661	0.94863	0.66645	0.37167	0.75454	0.6724	0.85475	0.54619	0.96507	0.89607	0.39367	0.99638	0.69945	0.58357	0.60465	0.49462	0.89477	0.44069	0.14477	0.95666	0.15163	0.56894	0.45555	0.96365	0.8633	0.70413	0.5113	0.80704	0.75234	0.39456	0.81373	0.55214	0.36668	0.08024	0.03023
QvarGC.CORE.3D.1	avgbs_cluster_31387.1.62	0.343313	Mrg11	Chr4C	52.8	0.38024	0.4894	0.96022	0.11651	0.01412	0.51428	0.29071	0.12267	0.00066866	0.00331	0.00503	0.13548	0.0554	0.28845	0.60294	0.09265	0.05616	0.00423	0.16408	0.26928	0.7277	0.79532	0.07758	0.53978	0.97219	0.02678	0.11908	0.02369	0.07076	0.08098	0.11025	0.13152	0.75088	0.77807	0.148	0.02959	0.00363	0.47826	0.28324	0.19661	0.3043	0.21858	0.4832	0.02819
QvarGC.CORE.3D.1	avgbs2_80464.1.24	0.175649	Mrg11	Chr4C	54	0.01338	0.38376	0.29772	0.13252	0.00728	0.29426	0.4185	0.05803	0.00064648	0.02359	0.00536	0.09711	0.09384	0.08156	0.95114	0.03442	0.76717	0.08438	0.20049	0.07442	0.22476	0.16884	0.02345	0.12594	0.50055	0.22757	0.02979	0.02937	0.19169	0.30255	0.06563	0.13214	0.2884	0.62263	0.13274	0.64563	0.09378	0.70053	0.02754	0.95717	0.16397	0.48283	0.01462	0.56623
QvarGC.CORE.3D.1	avgbs_95053.1.6	0.0159681	Mrg21	Chr4D	26	0.13988	0.5414	0.06089	0.27657	0.42216	0.44391	0.26476	0.00279	0.00659	0.01887	0.85051	0.00954	0.00265	0.29066	0.27782	0.49453	0.28192	0.4393	0.78319	0.23033	0.6672	0.27217	0.44419	0.26687	0.91492	0.6239	0.03523	0.13008	0.33642	0.25067	0.58775	0.37652	0.73893	0.48216	0.57789	0.21799	0.43396	0.65189	0.09493	0.6778	0.72675	0.21692	8.7386e-06	0.02913
QvarGC.CORE.3D.1	avgbs_58512.1.44	0.0778443	Mrg21	Chr4D	27.3	0.94379	0.16862	0.09894	0.26187	0.60602	0.80362	0.40121	0.38749	0.36885	0.49379	0.79053	0.59884	0.33888	0.77534	0.85026	0.56274	0.78974	0.70363	0.85493	0.61703	0.8165	0.14457	0.69531	0.74509	0.30786	0.86668	0.58547	0.62329	0.46211	0.45864	0.81744	0.61552	0.76936	0.18307	0.19815	0.68053	0.11039	0.81591	0.00747	0.85195	0.52155	0.08574	0.03175	0.25925
QvarGC.CORE.3D.1	avgbs_cluster_40123.1.45	0.131737	Mrg21	Chr4D	140.1	0.96186	0.22915	0.44552	0.42059	0.90585	0.62001	0.73533	0.10457	0.06853	0.00995	0.95676	0.25284	0.15378	0.01728	0.14282	0.33028	0.67594	0.28536	0.35671	0.14894	0.33568	0.52902	0.1718	0.53788	0.27563	0.42447	0.15554	0.10004	0.2672	0.09533	0.28505	0.08564	0.29629	0.47999	0.46818	0.01942	0.22898	0.81485	0.32738	0.3258	0.58952	0.06415	0.00126	0.0004279
QvarGC.CORE.3D.1	avgbs_216978.1.31	0.187625	Mrg24	Chr5A	20.6	0.91442	0.9191	0.45835	0.96312	0.60625	0.29374	0.71547	0.53418	0.0022	0.84743	0.21047	0.19846	0.37993	0.77945	0.31069	0.10918	0.57753	0.17817	0.04125	0.15051	0.41166	0.33588	0.2589	0.19476	0.83732	0.37011	0.11682	0.77688	0.13299	0.24104	0.3881	0.70971	0.08878	0.33305	0.49206	0.12941	0.61218	0.97684	0.0491	0.81908	0.29012	0.57698	0.56599	0.1427
QvarGC.CORE.3D.1	avgbs2_68229.1.6	0.113772	Mrg03	Chr5C	77.9	0.25805	0.01905	0.01313	0.19726	0.37148	0.69234	0.10149	0.67175	0.72966	0.25454	0.33602	0.68795	0.70462	0.88859	0.34961	0.64093	0.92119	0.85502	0.37745	0.34169	0.84684	0.96338	0.60161	0.47624	0.68448	0.91099	0.83098	0.39221	0.57207	0.52185	0.53343	0.19018	0.78661	0.88756	0.26932	0.05073	0.82567	0.16237	0.39793	0.04672	0.27531	0.39404	0.60467	0.18655
QvarGC.CORE.3D.1	avgbs_cluster_6454.1.50	0.0658683	Mrg03	Chr5C	162	0.99444	0.52107	0.97727	0.90291	0.99915	0.4728	0.99377	0.12425	0.29528	0.00224	0.07634	0.18911	0.10215	0.17102	0.07994	0.13766	0.44195	0.43831	0.20626	0.0511	0.15188	0.11034	0.05565	0.14726	0.23769	0.266	0.01148	0.04757	0.17527	0.0129	0.03929	0.08766	0.17209	0.33457	0.1649	0.64596	0.13662	0.81907	0.00464	0.89465	0.18278	0.08419	0.19427	0.16044
QvarGC.CORE.3D.1	avgbs_cluster_18848.1.61	0.117764	Mrg06	Chr5D	62.8	0.55252	0.90035	0.5391	0.45097	0.13893	0.95537	0.83253	0.09555	0.53693	0.0526	0.98752	0.17037	0.09326	0.6918	0.10775	0.93548	0.2048	0.77663	0.98321	0.87869	0.9467	0.88758	0.91842	0.47947	0.55831	0.18972	0.56975	0.56529	0.82451	0.74758	0.37106	0.995	0.51456	0.82276	0.51951	0.18769	0.7275	0.8848	0.8335	0.18223	0.72339	0.97616	0.19682	0.09978
QvarGC.CORE.3D.1	avgbs2_28211.1.43	0.0259481	Mrg06	Chr5D	67.6	0.49334	0.98547	0.80611	0.10506	0.71706	0.88264	0.6158	0.49145	2.3416e-05	0.068	0.12585	0.00017885	0.39535	0.38536	0.06325	0.2707	0.68438	0.39878	0.17637	0.21943	0.06185	0.48513	0.11875	0.3214	0.66771	0.24021	0.12585	0.08255	0.1434	0.21622	0.03742	0.12402	0.04572	0.29356	0.95803	0.09683	0.17289	0.50377	0.22896	0.07884	0.38868	0.37402	0.07341	0.39609
QvarGC.CORE.3D.1	avgbs2_31769.1.45	0.0898204	Mrg05	Chr6A	41.3	0.30881	0.17715	0.70763	0.32239	0.12832	0.2833	0.20272	0.04551	0.26525	0.01172	0.16394	0.12706	0.0639	0.36962	0.14674	0.14047	0.96784	0.11416	0.09098	0.11769	0.38095	0.2609	0.09519	0.12884	0.41342	0.07093	0.08598	0.06393	0.20861	0.76076	0.10718	0.11569	0.28467	0.43718	0.85369	0.08287	0.47879	0.74914	0.41465	0.36483	0.39215	0.07	0.00229	0.01245
QvarGC.CORE.3D.1	avgbs2_29001.1.15	0.38523	Mrg05	Chr6A	109.7	0.01467	0.34185	0.13017	0.20372	0.15281	0.26994	0.13914	0.06822	0.05043	0.00241	0.01065	0.38783	0.12671	0.00078349	0.43772	0.26573	0.98153	0.45246	0.52752	0.35293	0.50332	0.13364	0.15242	0.31101	0.26996	0.64784	0.03317	0.47072	0.16394	0.64812	0.19282	0.46495	0.3357	0.20719	0.71949	0.23818	0.33672	0.46549	0.33368	0.75133	0.6005	0.6002	0.00504	0.40525
QvarGC.CORE.3D.1	avgbs_216626.1.50	0.0618762	Mrg05	Chr6A	130.9	0.371	0.34768	0.1012	0.42676	0.59904	0.70875	0.50963	0.12627	0.0459	0.00461	0.44903	0.22826	0.15122	0.27153	0.62155	0.02253	0.55118	0.33653	0.02162	0.03673	0.31109	0.08303	0.21191	0.26265	0.58563	0.49096	0.10441	0.06208	0.74629	0.05335	0.03814	0.07326	0.37328	0.23669	0.42918	0.05774	0.15208	0.87457	0.68858	0.56356	0.07094	0.10382	0.42306	0.01526
QvarGC.CORE.3D.1	avgbs_cluster_9270.1.56	0.293413	Mrg04	Chr6D	32.7	0.89907	0.41074	0.50635	0.90257	0.53816	0.48813	0.65782	0.2584	0.05007	0.46504	0.31121	0.0398	0.41521	0.05628	0.74783	0.46883	0.72979	0.6925	0.18504	0.49507	0.65623	0.61089	0.39736	0.09973	0.58897	0.56702	0.88843	0.5888	0.34495	0.42983	0.20699	0.40547	0.67984	0.44589	0.2878	0.33969	0.61001	0.68826	0.47838	0.8615	0.19381	0.14232	0.01558	0.11088
QvarGC.CORE.3D.1	avgbs2_113127.1.9	0.131737	Mrg12	Chr7A	40.9	0.51281	0.48081	0.34886	0.38498	0.53646	0.07477	0.83735	0.21062	0.02892	0.17608	0.40299	0.00828	0.33683	0.02401	0.60394	0.3945	0.9983	0.81535	0.43345	0.30143	0.23037	0.39752	0.16388	0.74812	0.25875	0.67842	0.06752	0.443	0.09962	0.12813	0.16713	0.23988	0.18184	0.37766	0.53288	0.87017	0.89682	0.65262	0.06541	0.92909	0.44478	0.65018	0.28051	0.00575
QvarGC.CORE.3D.1	avgbs_88463.1.38	0.0558882	Mrg12	Chr7A	46.3	0.2894	0.07854	0.562	0.03198	0.81096	0.68662	0.63315	0.65971	0.12782	0.00497	0.05627	0.98456	0.61199	0.17211	0.50512	0.64779	0.00258	0.33442	0.66	0.64802	0.70224	0.97684	0.37288	0.63589	0.13109	0.36436	0.37592	0.55863	0.43657	0.95559	0.32776	0.66936	0.72046	0.93924	0.14461	0.01273	0.02095	0.27851	0.36778	0.38317	0.19565	0.19756	0.79426	0.0924
QvarGC.CORE.3D.1	avgbs_cluster_25655.1.18	0.0179641	Mrg09	Chr7C	93	0.02041	0.53609	0.44883	0.00037941	0.3038	0.04317	0.47936	0.52439	0.04184	0.03236	0.826	0.02226	0.78536	0.67922	0.79793	0.53751	0.97518	0.78057	0.2888	0.55082	0.63243	0.43201	0.45343	0.21458	0.63102	0.9921	0.38644	0.34392	0.48221	0.6215	0.14737	0.58487	0.55977	0.55088	0.59411	0.29447	0.4838	0.87989	0.09116	0.53031	0.31393	0.36462	0.0208	0.02182
QvarGC.CORE.3D.1	avgbs_223818.1.48	0.0279441	Mrg09	Chr7C	129	0.96121	0.41453	0.18349	0.40253	0.81701	0.75164	0.31219	0.12042	0.03314	0.02664	0.79537	0.13527	0.16159	0.35664	0.89605	0.1915	0.79273	0.09562	0.20514	0.2033	0.3381	0.49323	0.06605	0.11513	0.06272	0.15261	0.01406	0.03504	0.18555	0.0119	0.19323	0.34798	0.30916	0.36565	0.32667	0.03641	0.43256	0.06981	0.09491	0.05293	0.32922	0.27996	0.00027174	0.00016096
QvarGC.CORE.3D.1	avgbs_cluster_3621.1.42	0.111776	Mrg02	Chr7D	70.8	0.21946	0.11908	0.64459	0.02447	0.29539	0.06104	0.69981	0.14817	5.4305e-05	0.00026385	0.23034	0.00056784	0.3219	0.00957	0.14204	0.49097	0.05944	0.56341	0.02108	0.39582	0.58369	0.46953	0.48871	0.63174	0.66778	0.53299	0.1432	0.16691	0.71354	0.53702	0.37334	0.70316	0.37935	0.31559	0.57908	0.0095	0.02762	0.92549	0.5955	0.07987	0.15384	0.63394	0.01427	0.03334
QvarGC.CORE.3D.1	avgbs2_51787.1.26	0.131737	Mrg02	Chr7D	74.3	0.64335	0.39388	0.4582	0.1509	0.84827	0.87921	0.61616	0.25949	0.01956	0.00455	0.85436	0.22266	0.33631	0.37001	0.62192	0.1073	0.86608	0.03582	0.06435	0.10931	0.56688	0.43252	0.06901	0.03754	0.87215	0.09657	0.07239	0.00654	0.20572	0.01752	0.09638	0.15686	0.45837	0.424	0.13476	0.02075	0.36404	0.06488	0.07539	0.02576	0.25703	0.15983	0.00044553	0.00037439
QvarGC.CORE.3D.1	avgbs_309485	0.00598802				0.00335	0.63086	0.84513	0.01993	0.00159	0.00537	0.00121	0.15666	0.35231	0.02509	0.62288	0.31543	0.32057	0.62353	0.80383	0.03621	0.78349	0.03988	0.05098	0.18262	0.44841	0.01033	0.01011	0.17613	0.17259	0.09501	0.01271	0.00265	0.08549	0.00201	0.05249	0.12368	0.22461	0.01095	0.19382	0.00038705	0.01489	0.52401	0.03348	0.04006	0.03062	0.09653	0.62842	4.2984e-07
QvarGC.CORE.3D.1	avgbs_117866.1.17	0.00998004				0.60536	0.07444	0.97309	0.67697	0.59498	0.35367	0.28456	0.1757	0.089	0.07052	0.60501	0.03273	0.29569	0.1975	0.80507	0.84107	0.56163	0.33404	0.8636	0.56993	0.81003	0.48463	0.81188	0.30476	0.4248	0.17448	0.77529	0.99465	0.80805	0.08158	0.82444	0.71954	0.97764	0.36802	0.37707	0.03485	0.44181	0.31997	0.05084	0.91664	0.34559	0.57982	0.02134	0.14931
QvarGC.CORE.3D.1	avgbs_cluster_15875.1.56	0.00998004				0.37905	0.89542	0.08068	0.98175	0.46837	0.86064	0.83613	0.35753	0.471	0.30408	0.1658	0.97673	0.7037	0.36291	0.71961	0.48587	0.71446	0.19436	0.13396	0.66299	0.98974	0.30997	0.35497	0.22789	0.19925	0.34164	0.16496	0.1985	0.62828	0.02157	0.21605	0.79631	0.7046	0.43629	0.21585	0.91752	0.02576	0.42	0.55786	0.13723	0.24075	0.47583	0.04747	0.25331
QvarGC.CORE.3D.1	avgbs_cluster_21207.1.35	0.00998004				0.25671	0.95444	0.02674	0.99777	0.53198	0.77854	0.60583	0.48934	0.40092	0.27375	0.3163	0.72802	0.85167	0.37498	0.38806	0.23931	0.75673	0.08735	0.04286	0.44055	0.89665	0.28138	0.29912	0.26517	0.34045	0.16562	0.20521	0.33423	0.49938	0.01942	0.11598	0.53534	0.66147	0.42366	0.16517	0.33531	0.00971	0.47119	0.42761	0.21293	0.1316	0.3021	0.11844	0.37779
QvarGC.CORE.3D.1	avgbs_cluster_26100.1.10	0.00998004				0.57366	0.49049	0.68681	0.46371	0.49764	0.29734	0.99366	0.415	0.73932	0.64232	0.48755	0.3409	0.30538	0.99712	0.62811	0.38223	0.38813	0.4822	0.17214	0.24718	0.68455	0.63242	0.37341	0.10856	0.91437	0.30582	0.14151	0.25526	0.80597	0.03626	0.26194	0.35989	0.56553	0.75216	0.48226	0.61689	0.28523	0.5941	0.75865	0.87761	0.15462	0.29518	0.00755	2.4743e-07
QvarGC.CORE.3D.1	avgbs_109937.1.30	0.011976				0.28009	0.6817	0.09752	0.95387	0.70215	0.42406	0.97687	0.04984	0.12821	0.01257	0.09542	0.00466	0.08249	0.48462	0.20799	0.59828	0.0994	0.68193	0.32745	0.47553	0.8122	0.92659	0.52245	0.59987	0.96398	0.26925	0.24306	0.72557	0.45339	0.35416	0.19821	0.41312	0.68041	0.99513	0.81233	0.03849	0.05199	0.86934	0.21801	0.99311	0.73993	0.96917	0.0042	0.17356
QvarGC.CORE.3D.1	avgbs_cluster_35341.1.12	0.011976				0.05494	0.74945	0.53875	0.17078	0.00045579	0.70441	0.08812	0.5904	0.10666	0.02517	0.00099028	0.45958	0.94652	0.14637	0.17286	0.07467	0.88994	0.12089	0.18253	0.05965	0.71606	0.1105	0.07011	0.3027	0.93764	0.06216	0.06706	0.02687	0.07779	0.04222	0.27777	0.04527	0.81893	0.173	0.07862	0.11399	0.04956	0.25705	0.41589	0.22374	0.1219	0.01397	0.99965	0.06482
QvarGC.CORE.3D.1	avgbs2_58849.1.25	0.011976				0.71532	0.75823	0.33412	0.87326	0.99522	0.13052	0.7105	0.07656	0.26873	0.00038092	0.83911	0.90578	0.02797	0.05347	0.114	0.91496	0.19197	0.71282	0.8618	0.53832	0.19636	0.72904	0.84973	0.88	0.23012	0.67895	0.49755	0.39743	0.77819	0.15155	0.53013	0.89614	0.26159	0.71088	0.9115	0.13676	0.9031	0.7695	0.53293	0.35747	0.49344	0.54214	0.00668	0.00314
QvarGC.CORE.3D.1	avgbs2_65465.1.6	0.0139721				0.57665	0.36433	0.91196	0.79138	0.95631	0.37575	0.31713	0.72292	0.55374	0.88196	0.97733	0.48725	0.8948	0.46557	0.33586	0.7855	0.34137	0.75014	0.58794	0.7373	0.53927	0.89049	0.96227	0.06557	0.48789	0.87958	0.65438	0.84433	0.58402	0.6479	0.7408	0.99822	0.87068	0.48491	0.97473	0.72292	0.70117	0.61392	0.82297	0.78367	0.60135	0.96967	0.12298	0.00359
QvarGC.CORE.3D.1	avgbs_cluster_14984.1.40	0.0159681				0.37311	0.52631	0.04332	0.84599	0.27988	0.75937	0.78158	0.32992	0.5665	0.46612	0.67197	0.72931	0.24409	0.16291	0.69711	0.06356	0.88202	0.13974	0.01555	0.19775	0.177	0.03931	0.04225	0.0297	0.39944	0.12244	0.00244	0.1881	0.49411	0.02044	0.06002	0.11036	0.26314	0.18424	0.10213	0.4717	0.15378	0.10797	0.78642	0.45608	0.10891	0.04444	0.00040461	0.2707
QvarGC.CORE.3D.1	avgbs_cluster_2053.1.6	0.0159681				0.56627	0.44537	0.15103	0.06781	0.35894	0.88123	0.55988	0.78674	0.03116	0.00026134	0.23138	0.09429	0.64098	0.47497	0.54488	0.0003276	0.63913	0.00011159	5.7154e-05	0.00188	1.9899e-05	0.00080297	0.00027792	0.00949	0.04569	0.00334	0.00046171	0.00022065	0.00392	0.00094861	0.0001453	0.00092504	0.00066277	0.00078935	0.00409	0.00352	0.01194	0.01311	0.04645	0.94277	0.00022271	0.00071905	0.0313	0.08633
QvarGC.CORE.3D.1	avgbs_cluster_39001.1.51	0.0159681				0.6484	0.38488	0.30929	0.93636	0.75815	0.87056	0.63823	0.03556	0.1817	0.03515	0.08359	0.00149	0.10041	0.30086	0.28961	0.85421	0.1841	0.98841	0.77069	0.82878	0.91744	0.9125	0.98376	0.3516	0.92639	0.63878	0.6452	0.61933	0.63955	0.22458	0.39575	0.99469	0.92534	0.90304	0.54255	0.09927	0.30735	0.63618	0.0736	0.8365	0.71636	0.8693	0.013	0.34288
QvarGC.CORE.3D.1	avgbs_cluster_39031.1.47	0.0159681				0.48261	0.35315	0.29875	0.83367	0.37175	0.43688	0.91073	0.25421	0.8657	0.6869	0.12149	0.12205	0.55641	0.12409	0.40157	0.74144	7.2345e-15	0.58392	0.68851	0.21501	0.91722	0.01019	0.81998	0.12322	0.90866	0.2829	0.8121	0.78752	0.43918	0.18048	0.94283	0.54136	0.95886	0.0593	0.40082	0.00307	0.04306	0.02673	0.0564	0.94496	0.48126	0.03963	0.25498	0.43097
QvarGC.CORE.3D.1	avgbs_386289	0.0179641				0.90058	0.36353	0.48209	0.88112	0.98979	0.90847	0.74831	0.01547	0.00079456	0.02108	0.03845	0.00012477	0.03088	0.2482	0.43306	0.89467	0.09701	0.83035	0.69723	0.92452	0.72417	0.80001	0.74122	0.49537	0.86917	0.52658	0.42846	0.80344	0.59543	0.33184	0.26412	0.6728	0.80114	0.84648	0.62785	0.15203	0.29306	0.98849	0.06644	0.85376	0.81057	0.94399	2.5871e-05	0.20608
QvarGC.CORE.3D.1	avgbs_92655.1.16	0.0179641				0.99857	0.03064	0.71619	0.68718	0.57869	0.33524	0.91696	0.0813	0.0063	0.01143	0.13054	0.01208	0.02757	0.15257	0.50983	0.94307	0.7014	0.97613	0.99781	0.35174	0.88783	0.9689	0.89202	0.85126	0.89999	0.47627	0.51502	0.97303	0.93963	0.18304	0.74848	0.88464	0.88961	0.7325	0.95393	0.10187	0.54333	0.94717	0.25932	0.80413	0.73947	0.9763	0.00147	0.5643
QvarGC.CORE.3D.1	avgbs_cluster_14055.1.20	0.0179641				0.28146	0.57867	0.19539	0.66416	0.00384	0.32873	0.04521	0.03407	0.00155	0.65442	0.05215	0.11094	0.00107	0.13921	0.26454	0.00198	0.2624	0.00244	0.02564	0.00122	0.41388	0.00599	0.01153	0.30587	0.53755	0.0136	0.00112	0.011	0.01373	0.38617	0.02798	0.01003	0.64709	0.06073	0.00386	1.7521e-05	0.00212	0.0037	0.01511	0.11483	0.01565	1.2517e-05	0.00299	0.23149
QvarGC.CORE.3D.1	avgbs_25398.1.29	0.0199601				0.37024	0.64901	0.92206	0.1765	0.08254	0.8655	0.83504	0.94274	0.000352	0.10271	0.04006	0.12699	0.60559	0.89994	0.74106	0.00497	0.36767	0.01983	0.00663	0.00633	0.01642	0.0292	0.00132	0.43947	0.62239	0.04815	0.00016129	0.00087764	0.0045	0.0171	0.00295	0.00115	0.00741	0.03123	0.01868	0.41619	0.07049	0.00493	0.08272	0.77226	0.01688	0.03204	0.15507	0.1931
QvarGC.CORE.3D.1	avgbs_cluster_22434.1.22	0.0199601				0.66934	0.72475	0.33613	0.04622	0.22694	0.49169	0.74243	0.33128	2.1391e-05	5.5354e-05	0.62372	0.07163	0.12876	0.33466	0.56855	0.01323	0.54614	0.01123	0.00176	0.04126	0.00076179	0.02135	0.00305	0.09324	0.10456	0.00272	0.00887	0.0045	0.00041788	0.00489	0.00361	0.00371	0.00341	0.01485	0.00034582	0.00143	0.00106	6.3027e-05	0.13748	0.17844	0.00159	0.00041123	0.0002184	0.02009
QvarGC.CORE.3D.1	avgbs2_108152.1.23	0.0199601				0.89386	0.56699	0.60868	0.14658	0.5002	0.51091	0.89598	0.5454	4.7967e-05	2.7851e-05	0.32009	0.09829	0.21193	0.30786	0.11725	0.01988	5.1888e-05	0.00060612	0.00119	0.06533	0.000461	0.02885	0.00486	0.00268	0.13179	0.00124	0.01315	0.00993	0.00112	0.0044	0.00276	0.00521	0.00236	0.02483	0.00097711	0.00066789	0.00019516	0.00023183	0.27165	0.17859	0.00119	0.00088832	0.00036449	0.0645
QvarGC.CORE.3D.1	GMI_ES_LB_11578	0.0199601				0.66541	0.63049	0.32774	0.04951	0.24499	0.49803	0.64883	0.47105	1.7764e-05	1.7157e-05	0.70494	0.08272	0.18481	0.32923	0.46837	0.00624	0.48872	0.00573	0.00125	0.02183	0.00057497	0.01465	0.00115	0.09091	0.09671	0.00143	0.00427	0.00211	0.00026966	0.00517	0.00273	0.00156	0.00289	0.01168	0.00017058	0.00117	0.00063379	3.5907e-05	0.12176	0.18602	0.00105	0.00016052	0.00029302	0.01963
QvarGC.CORE.3D.1	avgbs_105455.1.46	0.0219561				0.18648	0.15759	0.70017	0.3915	0.02096	0.36597	0.94944	0.69434	2.94e-06	0.11187	0.00289	0.19816	0.70649	0.18387	0.57687	0.01739	7.9142e-05	0.09908	0.1422	0.04324	0.0274	0.04816	0.01134	0.62674	0.9416	0.07066	0.00211	0.03884	0.04689	0.59413	0.15487	0.00678	0.1027	0.03893	0.04298	0.02338	0.12481	0.00829	0.17724	0.72422	0.05921	0.02874	0.18364	0.13466
QvarGC.CORE.3D.1	avgbs_121529.1.14	0.0219561				0.52905	0.57571	0.75773	0.78114	0.01942	0.76886	0.73376	0.94408	0.00077207	0.17303	0.00568	0.37356	0.71301	0.56598	0.5158	0.08635	0.77686	0.12612	0.31181	0.1242	0.124	0.21449	0.02509	0.60419	0.54239	0.06205	0.00401	0.06151	0.08597	0.03234	0.18194	0.01673	0.18833	0.02311	0.07066	0.33671	0.11522	0.13356	0.51475	0.89508	0.24599	0.04843	0.34933	0.20631
QvarGC.CORE.3D.1	avgbs_398701.1.57	0.0219561				0.48696	0.08133	0.19494	0.62858	0.96046	0.17372	0.47354	0.29969	0.43713	0.00010778	0.72097	0.85586	0.13375	0.27027	0.24542	0.04842	0.37085	0.02305	0.12865	0.05455	0.44428	0.08819	0.07969	0.1673	0.46183	0.07633	0.20826	0.02657	0.05803	0.28352	0.22677	0.02753	0.30294	0.15984	0.07538	0.59239	0.37503	0.13227	0.00117	0.91591	0.1722	0.01788	0.14807	0.01483
QvarGC.CORE.3D.1	avgbs2_72656.1.24	0.0219561				0.2578	0.82413	0.65611	0.00886	0.10929	0.3316	0.9915	0.42816	0.00010892	3.4564e-05	0.94394	0.11084	0.23682	0.30913	0.78393	0.02451	0.60323	0.01543	0.00537	0.07749	0.00553	0.04306	0.0043	0.09136	0.15924	0.00382	0.02062	0.00295	0.00152	0.01555	0.00259	0.00937	0.0164	0.02982	0.00129	0.00145	0.00228	6.8194e-05	0.38463	0.31946	0.00456	0.00095849	0.00119	0.03555
QvarGC.CORE.3D.1	avgbs_cluster_23563.1.19	0.0239521				0.99732	0.14872	0.67454	0.44256	0.50225	0.91172	0.11561	0.07639	0.00986	0.10402	0.11799	0.00453	0.10954	0.04345	0.33143	0.95051	0.03647	0.91801	0.96271	0.91595	0.98362	0.94862	0.8283	0.93864	0.78901	0.32098	0.6992	0.83234	0.87316	0.15942	0.64114	0.99157	0.95346	0.90177	0.99463	0.20709	0.44108	0.95711	0.3317	0.72247	0.98765	0.36628	0.00099067	0.57238
QvarGC.CORE.3D.1	avgbs_cluster_36.1.57	0.0239521				0.79388	0.44746	0.42927	0.36056	0.92896	0.85694	0.3643	0.23883	0.0425	0.00955	0.80106	0.17235	0.30807	0.35388	0.94582	0.16437	0.87334	0.15112	0.09449	0.2766	0.43507	0.28734	0.19977	0.42898	0.74484	0.28546	0.07625	0.04908	0.22931	0.08911	0.15882	0.38056	0.44829	0.31428	0.21747	0.00435	0.38765	0.79142	0.25512	0.00875	0.15999	0.19274	0.00583	0.00015768
QvarGC.CORE.3D.1	avgbs_97742.1.60	0.0259481				0.75663	0.67591	0.70272	0.17904	0.96443	0.1602	0.95258	0.94385	0.22044	0.38834	0.6101	0.77784	0.99228	0.08935	0.49732	0.29725	0.80331	0.41946	0.39847	0.31039	0.70177	0.30827	0.41742	0.89463	0.94276	0.5117	0.48034	0.09083	0.72513	0.2249	0.40045	0.54014	0.87236	0.47454	0.97998	0.06935	0.40377	0.64964	0.94556	0.47294	0.67498	0.6164	0.13749	0.00151
QvarGC.CORE.3D.1	avgbs_cluster_3837.1.56	0.0259481				0.77035	0.4112	0.38619	0.47102	0.72256	0.84077	0.93282	0.28474	0.02136	0.01999	0.80841	0.19396	0.39732	0.37777	0.47617	0.35875	0.04279	0.38696	0.2105	0.36931	0.41289	0.48312	0.21259	0.57892	0.79292	0.43787	0.15648	0.09142	0.32608	0.12289	0.14551	0.4207	0.259	0.5146	0.8135	0.02425	0.29622	0.84646	0.31631	0.32425	0.50007	0.25574	0.00342	0.0001766
QvarGC.CORE.3D.1	avgbs_cluster_22006.1.52	0.0299401				0.05614	0.10862	0.98312	0.01229	0.06457	0.04055	0.42123	0.17404	0.23768	0.01773	0.36466	0.18535	0.45862	0.0012	0.95506	0.26175	0.30659	0.07831	0.53092	0.08105	0.56709	0.53488	0.19747	0.51803	0.57812	0.0321	0.43222	0.12166	0.11421	0.04504	0.2014	0.10059	0.47299	0.64743	0.01839	0.42785	0.05591	0.01775	0.07075	0.16293	0.10342	0.12404	0.06012	0.02341
QvarGC.CORE.3D.1	avgbs_cluster_3238.1.33	0.0299401				0.95472	0.20505	0.05653	0.09972	0.95841	0.67367	0.89545	0.11071	0.00741	0.00404	0.7415	0.22254	0.15228	0.35612	0.44286	0.0185	0.82267	0.00841	0.08071	0.0243	0.00337	0.0637	0.00223	0.27572	0.44875	0.00772	0.00245	0.00021652	0.02123	0.02714	0.07064	0.00784	0.02302	0.06204	0.00412	0.02501	0.01249	0.07344	0.01676	0.08595	0.05168	0.04051	0.0012	0.00037484
QvarGC.CORE.3D.1	avgbs_100921.1.10	0.0319361				0.8474	0.67395	0.95529	0.63967	0.96606	0.6545	0.87491	0.72274	0.0897	0.92893	0.65143	0.6564	0.68191	0.36158	0.55174	0.43163	0.54036	0.44073	0.49451	0.66501	0.3336	0.28053	0.42368	0.57771	0.93801	0.6528	0.57529	0.40606	0.37758	0.9375	0.16976	0.71609	0.37401	0.26659	0.44104	0.27919	0.27176	0.47896	0.22862	0.86768	0.24334	0.34424	0.38446	0.05933
QvarGC.CORE.3D.1	avgbs_122173.1.41	0.0339321				0.88468	0.44553	0.55789	0.9129	0.5772	0.45195	0.45981	0.23699	0.07636	0.20525	0.86708	0.03097	0.23428	0.51359	0.37967	0.00813	0.01129	0.25158	0.00254	0.00089319	0.04004	0.10505	0.02073	0.41785	0.30704	0.57563	0.0106	0.11471	0.03516	0.0012	0.04994	0.01012	0.07346	0.21211	0.48833	0.48993	0.70403	0.3767	0.50389	0.90928	0.20593	0.05977	0.00718	0.01875
QvarGC.CORE.3D.1	avgbs_cluster_20389.1.16	0.0339321				0.36985	0.94026	0.34088	0.26441	0.76776	0.73066	0.23147	0.50631	0.3453	0.19551	0.87225	0.68829	0.42926	0.59566	0.20571	0.70033	0.59665	0.6276	0.86475	0.83582	0.19378	0.82504	0.80988	0.73805	0.91578	0.5383	0.89862	0.58862	0.752	0.65209	0.78172	0.89889	0.27801	0.78003	0.60317	0.21987	0.65189	0.96399	0.55294	0.37927	0.7677	0.82995	0.05916	0.09045
QvarGC.CORE.3D.1	avgbs_100678.1.9	0.0399202				0.42471	0.31096	0.04001	0.40316	0.59464	0.89981	0.61756	0.48668	0.20135	0.36404	0.73383	0.72942	0.46315	0.84028	0.44303	0.00032375	0.7134	8.4606e-05	0.00076385	0.00085567	8.1698e-05	0.00506	0.00062437	0.18986	0.60803	0.00071512	0.00061622	0.00029794	0.00408	0.0047	0.0158	0.00144	0.00063967	0.01036	0.00391	0.01766	0.01119	0.10047	0.01244	0.16487	0.00855	0.00276	0.07844	0.05852
QvarGC.CORE.3D.1	avgbs_cluster_27473.1.40	0.0499002				0.63964	0.17703	0.4276	0.38125	0.66936	0.83614	0.75486	0.81537	0.06871	0.02015	0.3548	0.03474	0.74202	0.20011	0.62785	0.0785	0.81677	0.42426	0.00844	0.15744	0.04914	0.14069	0.01815	0.12389	0.09043	0.41563	0.0044	0.01052	0.02484	0.03066	0.0251	0.09202	0.0552	0.10153	0.46609	0.00020573	0.20925	0.98645	0.23212	0.29116	0.09523	0.11506	0.91398	0.00073449
QvarGC.CORE.3D.1	avgbs_66359.1.25	0.0518962				0.59236	0.52841	0.81791	0.11864	0.4975	0.79733	0.71955	0.43069	0.42265	0.01135	0.92616	0.53396	0.41293	0.83451	0.43015	0.35057	0.82235	0.23764	0.46947	0.38307	0.01102	0.42957	0.38861	0.73447	0.84814	0.10411	0.19406	0.36901	0.44889	0.50611	0.42145	0.15244	0.09931	0.39647	0.80672	0.00278	0.49757	0.88259	0.99116	0.09	0.64514	0.36604	0.17301	0.00344
QvarGC.CORE.3D.1	avgbs2_132525.1.9	0.0898204				0.95732	0.19511	0.36259	0.20677	0.99965	0.58429	0.78368	0.1572	0.09846	0.0137	0.80871	0.31602	0.14427	0.26168	0.46146	0.36864	0.79075	0.43271	0.15083	0.29746	0.70322	0.58786	0.1255	0.51826	0.55653	0.22841	0.142	0.03619	0.23181	0.07414	0.00836	0.30161	0.73452	0.57234	0.62971	0.02474	0.6725	0.62036	0.22489	0.29181	0.32334	0.25296	0.0044	0.00061034
QvarGC.CORE.3D.1	avgbs2_97182.1.22	0.0918164				0.59383	0.3367	0.4318	0.26166	0.46513	0.56761	0.56522	0.15868	0.01014	0.01114	0.80843	0.24127	0.19917	0.25494	0.20021	0.59616	0.60159	0.60141	0.34606	0.5068	0.71965	0.75083	0.37444	0.44588	0.96039	0.71075	0.17046	0.08225	0.39911	0.08554	0.21812	0.47209	0.68117	0.68333	0.65961	0.04713	0.68501	0.88147	0.09799	0.37732	0.43475	0.33084	0.00168	0.00038785
QvarGC.CORE.3D.1	avgbs2_74087.1.17	0.10978				0.04275	0.69452	0.68426	0.0964	0.03413	0.10145	0.15177	0.27747	0.55251	0.03922	0.05998	0.94066	0.24049	0.81051	0.80317	0.5419	0.19233	0.90431	0.2397	0.7022	0.79888	0.87757	0.58181	0.73331	0.92548	0.53127	0.39452	0.06111	0.23375	0.50085	0.33269	0.89567	0.88361	0.60932	0.2298	0.06587	0.66004	0.49587	0.27226	0.02741	0.57165	0.99203	0.00681	0.0325
QvarGC.CORE.3D.1	avgbs2_86523.1.9	0.10978				0.06663	0.35133	0.23266	0.08996	0.14298	0.5364	0.20273	0.80949	0.27098	0.18583	0.41929	0.7102	0.8837	0.99094	0.25539	0.39231	0.35265	0.38664	0.35823	0.64991	0.76161	0.61322	0.38369	0.84947	0.58972	0.46972	0.78915	0.37539	0.79808	0.99135	0.35389	0.95206	0.77917	0.52339	0.18862	0.21742	0.36397	0.53302	0.19792	0.00998	0.59481	0.62087	0.24357	0.00068183
QvarGC.CORE.3D.1	avgbs_51697.1.12	0.111776				0.93452	0.45585	0.77285	0.65943	0.92871	0.46778	0.9405	0.022	0.5511	0.03966	0.83704	0.35604	0.04173	0.04127	0.09486	0.34803	0.5456	0.22139	0.25588	0.17006	0.13999	0.52379	0.85388	0.34622	0.16778	0.22533	0.14135	0.6778	0.41241	0.20322	0.07605	0.47019	0.34765	0.97476	0.43332	0.77917	0.21059	0.79252	0.02387	0.66618	0.39539	0.25058	0.05445	0.01801
QvarGC.CORE.3D.1	avgbs_15227.1.25	0.173653				0.28008	0.94274	0.85937	0.21832	0.23373	0.79287	0.01143	0.82106	0.15868	0.07667	0.97114	0.41392	0.81113	0.49472	0.4001	0.14348	0.04762	0.02623	0.22602	0.19331	0.4421	0.33124	0.10561	0.58115	0.94465	0.05832	0.26527	0.01897	0.1567	0.06036	0.27031	0.12264	0.35184	0.14797	0.03354	0.01596	0.02447	0.2471	0.2488	0.30262	0.01811	0.00389	0.24219	0.11674
QvarGC.CORE.3D.1	avgbs_82910.1.9	0.177645				0.2469	0.66565	0.90392	0.41558	0.83243	0.548	0.37205	0.86798	0.00016106	0.08469	0.62586	0.00806	0.84787	0.42711	0.97896	0.12448	0.06653	0.33722	0.02409	0.15547	0.38585	0.06159	0.03622	0.58213	0.12631	0.13011	0.05036	0.03376	0.77861	0.07181	0.04133	0.06693	0.11023	0.021	0.36792	0.1356	0.67398	0.88992	0.54198	0.15127	0.05216	0.26118	0.53984	0.19632
QvarGC.CORE.3D.1	avgbs_29817.1.36	0.219561				0.8548	0.92344	0.94308	0.49657	0.93297	0.95953	0.98892	0.50191	0.05628	0.10085	0.92144	0.29826	0.38727	0.42313	0.94312	0.71644	0.9395	0.4366	0.9619	0.7345	0.69386	0.83972	0.41386	0.20117	0.39411	0.78597	0.19775	0.19343	0.07887	0.06386	0.72786	0.50857	0.67876	0.98593	0.92554	0.17877	0.90399	0.47206	0.31795	0.07426	0.9811	0.68415	0.76008	2.4619e-07
QvarGC.CORE.3D.1	avgbs_cluster_39367.1.26	0.221557				0.2876	0.37696	0.93301	0.27665	0.2606	0.7324	0.06697	0.32568	0.72983	0.21714	0.70293	0.51292	0.3476	0.92823	0.54423	0.34449	0.40824	0.52886	0.16339	0.24061	0.5327	0.20759	0.67086	0.75052	0.9468	0.87879	0.67501	0.37013	0.50275	0.59202	0.57303	0.40637	0.49308	0.4765	0.45591	0.02984	0.56311	0.66237	0.28569	0.66808	0.5308	0.32396	0.06872	0.08725
QvarGC.CORE.3D.1	avgbs2_192971.1.26	0.243513				0.28495	0.39263	0.99664	0.2683	0.22923	0.77836	0.08041	0.32798	0.82194	0.19026	0.70782	0.37201	0.35313	0.93364	0.58181	0.20626	0.44695	0.46971	0.09481	0.14904	0.3679	0.17476	0.48221	0.76582	0.73016	0.55325	0.43289	0.19522	0.4302	0.5835	0.56841	0.3319	0.41983	0.4354	0.39347	0.04322	0.53518	0.52351	0.22901	0.87315	0.45392	0.20912	0.05701	0.05861
QvarGC.CORE.3D.1	avgbs2_119732.1.23	0.255489				0.11888	0.60041	0.10976	0.06066	0.86696	0.0273	0.37387	0.36787	0.84597	0.26895	0.5674	0.54504	0.27608	0.61259	0.9187	0.62204	0.27734	0.37405	0.64222	0.65914	0.35011	0.57522	0.3729	0.68704	0.1411	0.18854	0.73719	0.32786	0.52819	0.70907	0.62509	0.72089	0.40256	0.79879	0.76378	0.15582	0.17465	0.6875	0.20854	0.17178	0.71487	0.26342	0.02243	0.51756
QvarGC.CORE.3D.2	avgbs_311274.1.63	0.0199601	Mrg19	Chr3D	45.4	0.05751	0.61321	0.04578	0.25471	0.10493	0.75317	0.55941	0.18359	1.2365e-07	0.31143	6.379e-05	0.02921	0.01174	0.48943	0.784	0.35539	0.02643	0.13817	0.22014	0.33949	0.12686	0.38528	0.5108	0.59819	0.63934	0.01202	0.40728	0.89845	0.7575	0.25331	0.5045	0.39084	0.37493	0.40997	0.77921	0.26326	0.42074	0.88389	0.86684	0.36264	0.68165	0.89426	0.03604	0.9366
QvarGC.CORE.3D.3	avgbs_cluster_33995.1.55	0.0179641	Mrg19	Chr3D	49.3	0.52838	0.75689	0.52722	0.65371	0.02458	0.16693	0.28185	1.2222e-05	0.00604	0.17935	0.01511	0.96927	9.7265e-07	0.07357	0.59363	0.34449	0.44738	0.76941	0.06545	0.4605	0.16704	0.49199	0.30968	0.48161	0.64866	0.768	0.4275	0.89161	0.58406	0.97568	0.0696	0.43237	0.76374	0.90154	0.63439	0.82568	0.74616	0.69082	0.55459	0.89147	0.15997	0.9843	0.01604	0.62922
QvarGC.CORE.3D.3	avgbs_cluster_44297.1.21	0.0239521	Mrg19	Chr3D	49.8	0.08356	0.06533	0.13204	0.11944	0.0451	0.46703	0.93258	0.13073	8.0871e-07	0.19519	0.13061	0.05667	0.00098213	0.10452	0.35486	0.76885	0.58422	0.56941	0.38786	0.4178	0.51345	0.6673	0.63281	0.05206	0.19879	0.96348	0.20688	0.2468	0.98957	0.22676	0.33551	0.39959	0.69995	0.87005	0.04251	0.43378	0.65749	0.21611	0.11695	0.9811	0.03722	0.12347	0.00013551	0.20383
QvarGC.CORE.Unk1	avgbs2_41857.1.6	0.10978	Mrg28	Chr1C	20.3	0.37882	0.14923	0.38925	0.26605	0.26871	0.63738	0.44814	0.12041	9.0848e-08	0.18134	0.03265	0.0038	0.06929	0.08444	0.17616	0.66241	0.55291	0.63025	0.63265	0.52718	0.28941	0.76715	0.35962	0.6411	0.26659	0.83254	0.1731	0.27704	0.68526	0.7932	0.34203	0.37901	0.13164	0.86317	0.2608	0.88796	0.39199	0.21888	0.40933	0.75546	0.13918	0.51198	6.247e-05	0.82961
QvarGC.CORE.Unk1	avgbs_cluster_498.1.16	0.143713	Mrg01	Chr1D	31.7	0.08368	0.35483	0.10753	0.32769	0.01627	0.98736	0.94023	0.03906	4.5385e-08	0.08709	0.26044	0.00246	0.01584	0.4865	0.48478	0.4585	0.46006	0.78332	0.15922	0.37406	0.2579	0.80879	0.18466	0.40802	0.10944	0.68243	0.40061	0.13654	0.13091	0.57887	0.19325	0.16628	0.16122	0.77203	0.43687	0.67846	0.45229	0.45829	0.33	0.94841	0.20461	0.4494	4.5163e-06	0.21239
QvarGC.CORE.Unk1	avgbs_40741.1.11	0.0838323	Mrg01	Chr1D	117.4	0.21142	0.79569	0.34479	0.36942	0.18595	0.81698	0.93665	0.27177	1.5986e-07	0.06129	0.2445	0.01003	0.08618	0.09406	0.86727	0.77014	0.35956	0.75671	0.66328	0.47576	0.78072	0.87095	0.38865	0.59508	0.1326	0.92772	0.63538	0.23218	0.4994	0.73653	0.419	0.2607	0.94021	0.48735	0.66798	0.88808	0.92357	0.5317	0.0349	0.81304	0.4862	0.51007	0.00022375	0.48221
QvarGC.CORE.Unk1	avgbs_cluster_1565.1.10	0.159681	Mrg33	Chr2A	32.3	0.2873	0.93111	0.42863	0.3155	0.32023	0.75713	0.57347	0.20451	1.4455e-07	0.90045	0.28751	0.01051	0.07898	0.26871	0.28991	0.75782	0.11622	0.61097	0.50677	0.53504	0.98888	0.77656	0.49311	0.42076	0.47635	0.77864	0.76887	0.16941	0.59311	0.75131	0.30551	0.29829	0.78679	0.72484	0.47107	0.9853	0.57615	0.47197	0.70909	0.78808	0.29289	0.28682	7.8632e-05	0.74411
QvarGC.CORE.Unk1	avgbs_216837	0.011976	Mrg13	Chr2C	35.9	0.36287	0.50089	0.76543	0.61026	0.01239	0.84949	0.44163	0.15038	7.1026e-07	0.1554	0.00824	0.02541	0.05917	0.89489	0.87846	0.0719	0.76874	0.10673	0.34118	0.02252	0.69176	0.09886	0.01256	0.98251	0.03497	0.47234	0.00574	0.04562	0.01731	0.01797	0.06404	0.01816	0.79805	0.18137	0.03213	0.64445	0.04539	0.10171	0.11297	0.54732	0.22364	0.13851	0.13181	0.26308
QvarGC.CORE.Unk1	avgbs_cluster_14173.1.6	0.0339321	Mrg13	Chr2C	49.1	0.41222	0.63154	0.34735	0.53539	0.14457	0.92956	0.06457	0.16477	9.2748e-08	0.10317	0.03202	0.00552	0.04554	0.04118	0.0842	0.25907	0.38821	0.33005	0.26002	0.39827	0.03159	0.15963	0.09127	0.9485	0.02249	0.40254	0.44099	0.08724	0.09976	0.05454	0.30144	0.32852	0.02837	0.08605	0.05712	0.72002	0.11974	0.08104	0.17225	0.18414	0.0327	0.2293	6.8009e-05	0.76612
QvarGC.CORE.Unk1	avgbs2_75326.1.18	0.0299401	Mrg13	Chr2C	71.4	0.13864	0.08975	0.10489	0.94091	0.11316	0.28918	0.4367	0.11988	1.1146e-07	0.16167	0.30455	0.00915	0.03996	0.44805	0.3269	0.58831	0.33186	0.57487	0.22204	0.58445	0.30428	0.81072	0.35689	0.94169	0.60485	0.76609	0.53743	0.19844	0.64684	0.70176	0.01189	0.3658	0.30577	0.61962	0.51408	0.85827	0.97071	0.47355	0.96429	0.80228	0.0722	0.47332	5.7964e-05	0.79516
QvarGC.CORE.Unk1	avgbs_121533.1.18	0.00998004	Mrg19	Chr3D	45.4	0.03313	0.85745	0.25155	0.66149	0.00183	0.64016	0.50172	0.07332	2.5005e-09	0.63633	6.1711e-06	0.07822	0.00178	0.30889	0.9282	0.23894	0.79962	0.57774	0.91989	0.1019	0.74219	0.32863	0.11162	0.24009	0.61651	0.55388	0.0384	0.11311	0.40306	0.27852	0.76579	0.0459	0.61314	0.34379	0.08846	0.61851	0.97772	0.04238	0.26418	0.61053	0.76077	0.36875	0.0021	0.91675
QvarGC.CORE.Unk1	avgbs_cluster_27794.1.9	0.00998004	Mrg19	Chr3D	45.4	0.05633	0.94853	0.33888	0.43757	0.00023733	0.26038	0.81454	0.01523	3.7126e-12	0.04295	1.589e-07	0.00075879	0.00017288	0.0609	0.17827	0.09135	0.09651	0.09621	0.59703	0.07876	0.33079	0.42513	0.03023	0.83778	0.99001	0.05482	0.02733	0.02004	0.04792	0.32563	0.36221	0.01148	0.55575	0.50987	0.0216	0.55837	0.07131	0.0274	0.32317	0.94604	0.24419	0.14653	0.00117	0.36488
QvarGC.CORE.Unk1	avgbs2_103676.1.17	0.00998004	Mrg19	Chr3D	45.4	0.03043	0.8417	0.24771	0.62221	0.00121	0.6152	0.50607	0.08702	1.3786e-09	0.54627	3.7617e-06	0.06994	0.00211	0.26843	0.82399	0.32269	0.8177	0.61104	0.89947	0.12647	0.86949	0.44064	0.17641	0.23543	0.67428	0.4809	0.03463	0.11998	0.46985	0.35803	0.77594	0.07159	0.67726	0.42374	0.14088	0.66413	0.98458	0.03795	0.26804	0.55379	0.76194	0.49197	0.00084941	0.73152
QvarGC.CORE.Unk1	avgbs2_107159.1.33	0.00998004	Mrg19	Chr3D	45.4	0.09961	0.80188	0.48076	0.51785	0.00030295	0.1934	0.8586	0.01211	9.7582e-12	0.06131	1.363e-07	0.00182	0.0001101	0.04862	0.28449	0.1745	0.07053	0.22331	0.61437	0.13983	0.45279	0.30547	0.06532	0.55324	0.92093	0.06349	0.0316	0.0487	0.06484	0.59471	0.40195	0.02808	0.69861	0.32348	0.03412	0.82668	0.10897	0.01717	0.39853	0.99634	0.24818	0.21874	9.7218e-05	0.21848
QvarGC.CORE.Unk1	avgbs2_178708.1.25	0.00998004	Mrg19	Chr3D	45.4	0.04537	0.87184	0.3469	0.38101	0.00017677	0.28065	0.93377	0.01002	2.0887e-12	0.0415	1.199e-07	0.00153	5.8438e-05	0.04882	0.18816	0.03878	0.09658	0.06694	0.38245	0.02342	0.33465	0.24968	0.00735	0.47107	0.76849	0.01782	0.0056	0.01011	0.01899	0.33299	0.26176	0.00348	0.57611	0.3107	0.01666	0.5924	0.08841	0.01778	0.29001	0.84096	0.20848	0.09849	4.7179e-05	0.36495
QvarGC.CORE.Unk1	avgbs_97796.1.33	0.011976	Mrg19	Chr3D	45.4	0.14883	0.73542	0.55247	0.71151	0.00474	0.82542	0.83264	0.1042	6.3833e-08	0.34322	4.9455e-05	0.24571	0.00299	0.08888	0.22508	0.0349	0.3336	0.20219	0.30709	0.01181	0.04201	0.09588	0.02954	0.54666	0.50076	0.2411	0.00818	0.21012	0.07569	0.11078	0.16255	0.0243	0.11231	0.28973	0.02214	0.57695	0.29433	0.03802	0.03992	0.35239	0.28629	0.33937	0.01182	0.94283
QvarGC.CORE.Unk1	avgbs2_145783.1.27	0.011976	Mrg19	Chr3D	45.4	0.02609	0.75773	0.28953	0.47744	0.00036279	0.63883	0.69571	0.07699	4.9337e-09	0.18596	4.6897e-06	0.07474	0.00143	0.32929	0.50324	0.11299	0.0838	0.24574	0.68772	0.04734	0.94481	0.40734	0.06352	0.63114	0.76796	0.21773	0.03007	0.08764	0.15399	0.23481	0.68623	0.01958	0.96842	0.40782	0.04781	0.69518	0.43149	0.01287	0.37197	0.52719	0.57999	0.29907	0.0022	0.95918
QvarGC.CORE.Unk1	avgbs2_54684.1.17	0.011976	Mrg19	Chr3D	45.4	0.01339	0.72755	0.1853	0.29313	0.00075523	0.60103	0.39486	0.04651	5.3328e-09	0.19676	1.6517e-06	0.0924	0.00104	0.29672	0.60371	0.23933	0.12812	0.36436	0.88622	0.12264	0.74524	0.43682	0.13438	0.83149	0.73836	0.39917	0.06092	0.11229	0.26645	0.31008	0.81322	0.04788	0.63327	0.45407	0.09004	0.99827	0.70017	0.03725	0.38646	0.54761	0.74992	0.46142	0.00357	0.87315
QvarGC.CORE.Unk1	avgbs_106329.1.34	0.0139721	Mrg19	Chr3D	45.4	0.07281	0.50856	0.31871	0.81756	0.00501	0.3938	0.80067	0.21733	9.5499e-09	0.828	5.0797e-05	0.2991	0.00928	0.56121	0.843	0.51469	0.82459	0.98101	0.57925	0.2859	0.55183	0.76197	0.45126	0.51137	0.85468	0.94943	0.19305	0.43388	0.65367	0.38099	0.90381	0.19239	0.87103	0.71767	0.22	0.59911	0.66866	0.13448	0.00074774	0.81229	0.87661	0.78104	0.0061	0.83086
QvarGC.CORE.Unk1	avgbs_38420.1.44	0.0139721	Mrg19	Chr3D	45.4	0.08528	0.9188	0.3978	0.67006	0.00261	0.5918	0.44926	0.07332	5.1311e-08	0.42499	1.3913e-05	0.2148	0.00235	0.40221	0.8967	0.10908	0.27199	0.15733	0.49789	0.08346	0.30257	0.34245	0.16479	0.72279	0.62067	0.25439	0.12051	0.18754	0.30851	0.37923	0.82791	0.07191	0.49645	0.29971	0.21087	0.98718	0.84208	0.10013	0.63461	0.73379	0.97344	0.64584	0.0047	0.83824
QvarGC.CORE.Unk1	avgbs_cluster_16749.1.37	0.0139721	Mrg19	Chr3D	45.4	0.06236	0.52127	0.51768	0.44802	0.00392	0.45287	0.75121	0.09852	3.0243e-08	0.41708	4.6066e-06	0.12199	0.00155	0.53961	0.3732	0.51252	0.28172	0.61331	0.94542	0.27594	0.78416	0.66465	0.27307	0.67606	0.80558	0.58657	0.11075	0.17988	0.41075	0.23834	0.96471	0.13124	0.70461	0.45728	0.22778	0.83649	0.65828	0.06387	0.51751	0.51753	0.91999	0.71463	0.00575	0.94447
QvarGC.CORE.Unk1	avgbs2_61814.1.47	0.0139721	Mrg19	Chr3D	45.4	0.11477	0.72527	0.62301	0.67838	0.00121	0.44327	0.53918	7.6236e-05	2.6229e-11	0.04166	1.0337e-06	0.00596	1.1561e-06	0.21035	0.59831	0.02741	0.19993	0.02397	0.38483	0.02695	0.02538	0.05166	0.00477	0.78776	0.62403	0.01028	0.00833	0.02392	0.01294	0.64494	0.11582	0.0028	0.03611	0.02496	0.02472	0.02336	0.0038	0.04733	0.12825	0.93624	0.11094	0.01893	0.00015067	0.67607
QvarGC.CORE.Unk1	avgbs_cluster_46297.1.44	0.0179641	Mrg19	Chr3D	45.4	0.08123	0.95484	0.38369	0.65386	0.00389	0.81603	0.3231	0.09456	3.2633e-08	0.38672	1.5331e-05	0.1061	0.00167	0.38059	0.67457	0.36744	0.26297	0.60226	0.97567	0.24302	0.42121	0.2941	0.28255	0.57006	0.79376	0.64542	0.14209	0.20695	0.49379	0.5434	0.86926	0.1177	0.4989	0.34797	0.10425	0.8859	0.76104	0.05785	0.6187	0.6087	0.60445	0.09081	0.0014	0.97668
QvarGC.CORE.Unk1	avgbs2_16883.1.27	0.011976	Mrg19	Chr3D	47	0.02963	0.79079	0.2711	0.3642	0.00093143	0.56963	0.56275	0.0607	7.3371e-09	0.2386	5.87e-06	0.08318	0.0009458	0.37452	0.50493	0.26365	0.13262	0.41071	0.91758	0.12517	0.96776	0.49951	0.16723	0.77731	0.89355	0.38768	0.091	0.15091	0.296	0.32845	0.95248	0.04639	0.76361	0.53288	0.14742	0.86877	0.67595	0.04528	0.52938	0.6634	0.93615	0.48753	0.00191	0.79201
QvarGC.CORE.Unk1	avgbs_cluster_19712.1.15	0.0159681	Mrg19	Chr3D	47	0.03252	0.38101	0.29238	0.36383	0.00281	0.59998	0.85818	0.02704	1.3064e-08	0.27744	4.4491e-06	0.01222	0.00158	0.38721	0.83156	0.45098	0.27993	0.1935	0.78278	0.20692	0.91104	0.71101	0.29812	0.36003	0.93871	0.13202	0.06451	0.23276	0.47981	0.19424	0.88715	0.10936	0.93585	0.50872	0.17852	0.36353	0.87684	0.02979	0.26862	0.79173	0.96304	0.31809	0.00812	0.9377
QvarGC.CORE.Unk1	avgbs2_180766.1.23	0.0139721	Mrg19	Chr3D	49.3	0.08623	0.85064	0.29263	0.98426	0.01325	0.44553	0.7591	0.07838	4.8348e-07	0.94482	0.00066614	0.17108	0.00234	0.27285	0.81222	0.53616	0.16093	0.8719	0.8452	0.40645	0.81354	0.57725	0.64555	0.85885	0.96342	0.9453	0.30914	0.64719	0.74465	0.58366	0.69	0.38892	0.63078	0.42205	0.37295	0.68138	0.96776	0.29552	0.94776	0.58618	0.71433	0.72714	0.01329	0.94757
QvarGC.CORE.Unk1	avgbs_cluster_13310.1.43	0.0139721	Mrg19	Chr3D	52.8	0.22523	0.9937	0.51321	0.87708	0.01381	0.57553	0.9297	0.07594	4.9109e-09	0.04857	1.8695e-05	0.00303	0.0032	0.10657	0.25306	0.40444	0.37107	0.65476	0.94915	0.38912	0.6586	0.61802	0.24508	0.228	0.68491	0.57133	0.13618	0.30407	0.11363	0.637	0.98136	0.18683	0.39696	0.59191	0.32218	0.80332	0.31567	0.35233	0.84963	0.9411	0.74377	0.40627	0.00431	0.72785
QvarGC.CORE.Unk1	avgbs_cluster_37309.1.17	0.139721	Mrg19	Chr3D	77.8	0.01316	0.73025	0.42223	0.19274	0.00442	0.09216	0.01066	0.28012	2.6692e-07	0.58497	0.0052	0.00336	0.11381	0.33843	0.61222	0.65047	0.46586	0.89353	0.21099	0.90447	0.763	0.52834	0.35171	0.50311	0.11334	0.84549	0.34962	0.3845	0.67493	0.217	0.25481	0.86505	0.9507	0.3415	0.2776	0.79167	0.91751	0.24169	0.11277	0.36357	0.35267	0.87602	0.36196	0.87575
QvarGC.CORE.Unk1	avgbs_cluster_12956.1.32	0.0199601	Mrg11	Chr4C	37.9	0.07698	0.90299	0.28104	0.3659	0.00019478	0.1472	0.50689	0.50997	6.8988e-07	0.37326	3.3525e-08	0.05202	0.23572	0.16566	0.59468	0.25039	0.23998	0.11282	0.38895	0.53465	0.6425	0.45662	0.42938	0.18491	0.70098	0.29061	0.3871	0.4651	0.63405	0.57932	0.76593	0.53564	0.46598	0.60715	0.40702	0.43957	0.14628	0.85989	0.4181	0.92131	0.91965	0.62078	0.21633	0.24994
QvarGC.CORE.Unk1	avgbs_106312.1.15	0.0698603	Mrg21	Chr4D	28.3	0.36334	0.99869	0.48018	0.70917	0.09817	0.83915	0.46058	0.00936	2.281e-06	0.83091	0.32608	0.00080791	0.00169	0.42277	0.46483	0.58245	0.45694	0.99665	0.48613	0.34112	0.85571	0.44235	0.58552	0.72355	0.73977	0.8968	0.6062	0.45195	0.48823	0.94468	0.36098	0.35414	0.82425	0.59965	0.21548	0.74014	0.4421	0.17162	0.04996	0.7659	0.20882	0.10853	1.2255e-06	0.97859
QvarGC.CORE.Unk1	avgbs_17087.1.24	0.245509	Mrg21	Chr4D	172	0.10157	0.73025	0.70706	0.56462	0.00529	0.5287	0.19741	0.14906	7.3526e-08	0.72142	0.00281	0.00353	0.17762	0.52385	0.2596	0.03369	0.88716	0.02309	0.0145	0.09247	0.29989	0.14019	0.01246	0.3021	0.6192	0.02839	0.05737	0.03938	0.04959	0.34711	0.00642	0.03883	0.41708	0.06517	0.12435	0.6563	0.6801	0.23875	0.23504	0.42866	0.03045	0.16237	0.55906	0.71037
QvarGC.CORE.Unk1	avgbs2_134662.1.14	0.03	Mrg06	Chr5D	67.6	0.41931	0.58533	0.86103	0.00782	0.25723	0.95431	0.34943	0.00036235	7.6047e-08	2.8871e-06	0.25944	0.00331	0.00037852	0.89602	0.29938	0.15111	0.48288	0.20948	0.03909	0.16637	0.1635	0.57776	0.03176	0.07633	0.69074	0.35594	0.18433	0.00147	0.06729	0.00755	0.03858	0.07065	0.23384	0.36854	0.13855	0.58276	0.30502	0.0281	0.03802	0.929	0.0368	0.2434	1.6026e-08	0.13405
QvarGC.CORE.Unk1	avgbs2_126009.1.38	0.0538922	Mrg06	Chr5D	87.2	0.38494	0.18429	0.39015	0.75742	0.09607	0.89632	0.97543	0.13024	3.135e-08	0.14169	0.23522	0.00222	0.05266	0.03368	0.7321	0.00020647	0.0984	0.01109	0.00057236	6.5432e-05	0.00571	0.00405	0.00332	0.09218	0.0516	0.03509	0.01802	0.04175	0.03573	0.01463	0.01516	0.00309	0.00634	0.12805	0.15776	0.13328	0.05392	0.04717	0.92991	0.8628	0.09471	0.04276	5.9247e-05	0.38899
QvarGC.CORE.Unk1	avgbs2_179253.1.19	0.011976	Mrg06	Chr5D	101.5	0.34345	0.83434	0.6996	0.7216	0.00365	0.5895	0.08672	0.01241	4.4969e-08	0.86115	0.00014439	0.00134	0.02957	0.58527	0.65636	0.01439	0.72668	0.02168	0.02497	0.08008	0.00911	0.00841	0.02527	0.26217	0.85566	0.01878	0.02551	0.00821	0.02195	0.25681	0.02667	0.04578	0.04372	0.0098	0.00020813	0.4149	0.00039733	0.04503	0.01481	0.10599	0.00167	0.00117	0.43577	0.95344
QvarGC.CORE.Unk1	avgbs2_155166.1.53	0.011976	Mrg06	Chr5D	102.3	0.04833	0.98586	0.1417	0.57671	0.00043119	0.65008	0.1887	0.00987	6.3961e-10	0.67399	6.8317e-05	0.00086908	0.02743	0.50787	0.8164	8.5348e-05	0.80269	0.00372	0.00065713	0.0004661	0.00054238	0.00021822	0.00059891	0.5196	0.78875	0.00909	0.00454	0.00105	0.00362	0.15482	0.00888	0.00067868	0.00675	0.00168	6.3141e-05	0.74088	0.0006054	0.04329	0.0065	0.2174	0.00039585	0.00029344	0.80855	0.8151
QvarGC.CORE.Unk1	avgbs_309411	0.00798403				0.02996	0.61475	0.36102	0.62896	0.00045645	0.18337	0.92217	0.0307	1.4428e-13	0.11569	1.0191e-07	0.00215	0.00021083	0.05088	0.45353	0.09834	0.81998	0.21481	0.53532	0.0394	0.3829	0.22504	0.01521	0.21743	0.54608	0.06428	0.00482	0.0148	0.04142	0.30513	0.29744	0.01031	0.63401	0.29181	0.02816	0.96973	0.22914	0.01482	0.21814	0.86094	0.23954	0.16472	3.7559e-05	0.32599
QvarGC.CORE.Unk1	avgbs_cluster_18611.1.11	0.00998004				0.04266	0.93865	0.57048	0.67426	6.2881e-05	0.57826	0.08394	0.03907	8.7e-11	0.61829	1.1369e-05	0.00024851	0.19771	0.47092	0.61509	0.00313	0.75135	0.019	0.01095	0.00598	0.04104	0.00164	0.00309	0.18896	0.62216	0.01976	0.00477	0.00172	0.00685	0.08837	0.0133	0.0038	0.13829	0.00279	0.00044643	0.81733	0.00273	0.03397	0.01001	0.47675	0.00235	0.00063269	0.93985	0.65317
QvarGC.CORE.Unk1	avgbs_310219	0.011976				0.03072	0.85763	0.29434	0.43841	0.00106	0.5337	0.62942	0.04794	3.9436e-09	0.19238	5.4617e-06	0.0893	0.00085152	0.28832	0.59409	0.22015	0.16692	0.31133	0.97328	0.10794	0.84726	0.53353	0.13712	0.58662	0.84535	0.36131	0.05631	0.12261	0.22377	0.31281	0.91919	0.04538	0.6693	0.54865	0.07392	0.92511	0.53302	0.0215	0.35612	0.52847	0.95144	0.3633	0.00104	0.85631
QvarGC.CORE.Unk1	avgbs_41087.1.20	0.011976				0.2489	0.92526	0.41548	0.77169	0.02187	0.23244	0.99684	0.04505	1.1029e-10	0.00444	2.3753e-05	0.00736	0.00157	0.04708	0.5589	0.7658	0.32496	0.54376	0.09446	0.51994	0.28307	0.96673	0.50727	0.84507	0.48268	0.63875	0.49615	0.33174	0.51546	0.77554	0.01372	0.31306	0.50699	0.90328	0.53045	0.65516	0.93892	0.50576	0.94973	0.27754	0.01415	0.23014	2.6901e-05	0.43541
QvarGC.CORE.Unk1	avgbs_424276	0.011976				0.02794	0.79871	0.26214	0.43084	0.00094691	0.57386	0.54409	0.05434	5.6277e-09	0.23205	4.5791e-06	0.09246	0.00081194	0.351	0.65347	0.20391	0.13845	0.31219	0.98451	0.08834	0.84868	0.4737	0.11824	0.61665	0.85583	0.35898	0.04953	0.09513	0.23339	0.2739	0.84467	0.03746	0.70214	0.46872	0.08117	0.80534	0.65379	0.02301	0.33401	0.60704	0.87746	0.32933	0.00219	0.83206
QvarGC.CORE.Unk1	avgbs_cluster_35921.1.35	0.011976				0.01553	0.63105	0.15668	0.28389	0.00064103	0.42679	0.46739	0.03256	2.0886e-09	0.29379	3.1074e-05	0.07802	0.00074842	0.27455	0.97209	0.29354	0.09877	0.43569	0.8665	0.11367	0.93166	0.42886	0.1826	0.80912	0.66497	0.35722	0.06266	0.15059	0.28367	0.30192	0.94745	0.04634	0.93338	0.42099	0.15378	0.69317	0.71809	0.0474	0.44627	0.65129	0.97723	0.48397	0.00188	0.64661
QvarGC.CORE.Unk1	avgbs2_162207.1.38	0.011976				0.49392	0.40367	0.31914	0.93717	0.07063	0.32066	0.85373	0.08413	1.2845e-05	0.02328	0.0079	0.07795	0.00522	0.03381	0.06362	0.10656	0.12636	0.07068	0.18355	0.02469	0.31212	0.62861	0.08692	0.92954	0.32124	0.03069	0.01699	0.0251	0.10749	0.15342	0.58037	0.01589	0.50895	0.84931	0.05347	0.29828	0.09355	0.16688	0.48979	0.20208	0.24509	0.25411	0.00052508	0.19469
QvarGC.CORE.Unk1	avgbs2_173902.1.52	0.011976				0.71839	0.90353	0.84952	0.70031	0.93272	0.80891	0.47506	0.01976	1.023e-07	0.2835	0.39747	0.00039799	0.022	0.39745	0.60368	0.09311	0.92808	0.68544	0.03206	0.45264	0.73792	0.16243	0.13239	0.85683	0.46173	0.57001	0.11768	0.55681	0.03472	0.16806	0.03661	0.18829	0.50471	0.06736	0.05201	0.36352	0.11324	0.51037	0.4653	0.03295	0.17105	0.06646	0.49752	0.06314
QvarGC.CORE.Unk1	avgbs_cluster_18444.1.6	0.0139721				0.0375	0.62478	0.03493	0.85546	0.00493	0.25427	0.51959	0.04374	4.9903e-07	0.05637	2.2106e-08	0.06784	0.00098566	0.05494	0.12148	0.41949	0.09002	0.1067	0.18657	0.41737	0.25493	0.79045	0.41099	0.02474	0.81208	0.00437	0.42865	0.56775	0.62875	0.48774	0.06139	0.08975	0.47106	0.50552	0.76565	0.27916	0.17236	0.9127	0.22408	0.85902	0.09064	0.92895	0.06678	0.64103
QvarGC.CORE.Unk1	avgbs_cluster_4422.1.34	0.0159681				0.07303	0.96407	0.39137	0.10351	0.16968	0.22175	0.61277	0.04935	5.8744e-08	0.52842	0.24001	0.00356	0.04372	0.85109	0.3388	0.91229	0.49754	0.67718	0.32532	0.45304	0.00481	0.93355	0.66635	0.45786	0.34365	0.94386	0.5156	0.55288	0.7032	0.8618	0.17235	0.13395	0.00497	0.95651	0.16555	0.14206	0.35844	0.08294	0.37702	0.25682	0.52345	0.45085	2.8601e-05	0.87379
QvarGC.CORE.Unk1	avgbs_cluster_54016.1.37	0.0159681				0.11528	0.50083	0.05801	0.93244	0.02469	0.31631	0.71255	0.18851	3.9319e-07	0.06714	6.1674e-06	0.20345	0.01352	0.08686	0.28741	0.87029	0.02556	0.51559	0.23495	0.8354	0.51729	0.79756	0.93136	0.12537	0.78379	0.3325	0.88403	0.76406	0.86388	0.68354	0.09639	0.49805	0.75697	0.81483	0.76929	0.61764	0.31357	0.94557	0.36232	0.9634	0.1471	0.79004	0.03058	0.76616
QvarGC.CORE.Unk1	avgbs_cluster_64636.1.38	0.0159681				0.00483	0.56381	0.04094	0.05676	0.00875	0.2237	0.77399	0.09577	2.4543e-07	0.39905	7.3484e-05	0.04093	0.00601	0.5787	0.68272	0.00204	0.16916	0.00272	0.01035	0.00215	0.01728	0.02531	1.2792e-05	0.51753	0.0004144	0.00011269	0.00086566	2.9142e-05	0.00063192	0.00271	0.04649	2.7919e-05	0.07156	0.06697	0.01097	0.33401	0.00797	0.01876	0.17833	0.5558	0.12701	0.09597	0.02118	0.95045
QvarGC.CORE.Unk1	avgbs2_181756.1.64	0.0159681				0.46957	0.04627	0.30051	0.04376	0.25203	0.28126	0.9021	0.12718	5.3329e-08	0.15392	0.57295	0.00593	0.13263	0.23029	0.70929	0.82753	0.53608	0.3542	0.99422	0.99577	0.18716	0.72214	0.97493	0.83435	0.10065	0.91752	0.47386	0.76631	0.70544	0.12014	0.81786	0.52859	0.40745	0.96827	0.97167	0.74868	0.99825	0.14867	0.73405	0.87086	0.22183	0.71992	0.00050118	0.71836
QvarGC.CORE.Unk1	avgbs_388772.1.19	0.0199601				0.05941	0.95007	0.35814	0.08478	0.01803	0.5046	0.23648	0.19682	9.8957e-07	0.07609	0.01907	0.16672	0.04274	0.56598	0.48596	0.14451	0.50641	0.11642	0.1456	0.1642	0.19022	0.48026	0.01904	0.37254	0.6317	0.08077	0.01309	0.00745	0.00908	0.4604	0.1165	0.0089	0.18451	0.30477	0.06145	0.73584	0.25526	0.01238	0.29504	0.9973	0.10724	0.52326	0.00467	0.91474
QvarGC.CORE.Unk1	avgbs2_53362.1.22	0.0219561				0.08795	0.03462	0.56584	0.32641	0.07332	0.33538	0.53	0.34432	8.1411e-07	0.4693	0.18749	0.33229	0.0048	0.09144	0.07774	0.71552	0.48608	0.15884	0.88567	0.22232	0.29137	0.24159	0.56956	0.04831	0.18551	0.1025	0.08509	0.35519	0.98636	0.55195	0.88524	0.19371	0.52876	0.28487	0.0277	0.47487	0.83188	0.36538	0.17926	0.6507	0.15622	0.27798	0.00273	0.06547
QvarGC.CORE.Unk1	avgbs_cluster_1638.1.6	0.0279441				0.18935	0.0178	0.44127	0.01165	0.75266	0.15699	0.25603	0.51738	3.6883e-07	0.11551	0.43775	0.003	0.61457	0.89229	0.74776	0.05336	7.2515e-05	0.16927	0.00283	0.02701	0.18692	0.1411	0.01087	0.22559	0.4734	0.00269	0.00661	0.054	0.04228	0.09408	0.11372	0.01003	0.23552	0.00638	0.002	0.227	6.5048e-05	0.48892	0.01397	0.5951	0.00067538	0.01349	0.28411	0.70742
QvarGC.CORE.Unk1	avgbs_cluster_25775.1.28	0.0339321				0.12152	0.01877	0.42039	0.49475	0.01328	0.14615	0.08423	0.39697	1.1521e-07	0.14786	0.00283	0.01101	0.45416	0.58548	0.84214	0.62468	0.82448	0.68094	0.32952	0.76917	0.6504	0.42522	0.4188	0.70305	0.31935	0.79674	0.34837	0.27598	0.97366	0.54356	0.41157	0.63529	0.98621	0.27256	0.57517	0.66951	0.32004	0.68315	0.54821	0.5765	0.38118	0.55923	0.36496	0.60092
QvarGC.CORE.Unk1	avgbs_cluster_5771.1.44	0.0499002				0.16082	0.56198	0.32459	0.37974	0.00213	0.12807	0.90511	0.10991	1.8734e-07	0.036	7.3781e-06	0.00595	0.01362	0.62804	0.37557	0.13623	0.02431	0.02477	0.46201	0.0775	0.18523	0.61389	0.13084	0.34546	0.84871	0.04892	0.26475	0.09027	0.11041	0.33406	0.23411	0.01536	0.51415	0.55943	0.05874	0.31535	0.0096	0.09875	0.43606	0.99433	0.19339	0.05128	0.10638	0.94634
QvarGC.CORE.Unk1	avgbs_66009.1.28	0.133733				0.21933	0.88782	0.17552	0.90823	0.28438	0.63886	0.53196	0.30006	4.513e-07	0.89883	0.39941	0.00891	0.09619	0.25699	0.21247	0.72567	0.0279	0.89263	0.55363	0.37171	0.61391	0.89931	0.53692	0.3819	0.28329	0.83891	0.72787	0.28071	0.58839	0.55065	0.46844	0.26753	0.66708	0.72185	0.31808	0.97281	0.23348	0.40371	0.74731	0.96595	0.22443	0.34612	0.00043189	0.17886
QvarGC.CORE.Unk1	avgbs_cluster_22119.1.62	0.161677				0.08877	0.7028	0.6324	0.47762	0.08075	0.49703	0.03468	0.18599	8.1619e-08	0.13865	0.03033	0.03522	0.11274	0.30259	0.08933	0.42058	0.95906	0.53269	0.28527	0.94189	0.7359	0.03523	0.0954	0.4722	0.20606	0.2581	0.10747	0.30983	0.44624	0.91622	0.11778	0.75283	0.5388	0.00714	0.10005	0.28478	0.18318	0.12821	0.10351	0.61926	0.04199	0.18098	0.76621	0.86649
QvarGC.CORE.Unk1	avgbs_92406.1.12	0.241517				0.02491	0.98569	0.17931	0.61733	0.00018262	0.91951	0.2934	0.07669	5.7171e-13	0.08821	2.1725e-05	8.0248e-05	0.03595	0.79786	0.74649	0.24697	0.94325	0.40598	0.73739	0.23486	0.31517	0.45045	0.15383	0.59673	0.5753	0.18709	0.19726	0.05247	0.22185	0.77665	0.4925	0.14059	0.65474	0.57175	0.11464	0.41304	0.0864	0.49019	0.34491	0.01583	0.58765	0.38876	0.00752	0.6722
QvarGC.CORE.Unk1	avgbs_cluster_36783.1.49	0.285429				0.24618	0.19894	0.16202	0.57908	0.11046	0.62375	0.95568	0.14753	1.3886e-07	0.13469	0.04937	0.0048	0.05528	0.70505	0.31677	0.53824	0.30087	0.42424	0.79237	0.145	0.73993	0.7646	0.47432	0.6721	0.71591	0.76588	0.37228	0.41229	0.37217	0.13768	0.42653	0.21306	0.73685	0.98734	0.49678	0.31792	0.7551	0.77412	0.77436	0.28331	0.59304	0.42989	0.0006837	0.56167
QvarGC.CORE.Unk2	avgbs2_198262.1.30	0.0159681				0.03823	0.0896	0.71794	0.04307	0.01594	0.11857	0.37978	0.00938	2.0397e-09	0.0082	0.3409	0.00153	0.03828	0.10981	0.51172	0.75908	0.81615	0.6989	0.80916	0.98872	0.74586	0.57233	0.71925	0.52804	0.3008	0.54174	0.39004	0.63398	0.64505	0.45255	0.93481	0.97773	0.68363	0.81799	0.1727	0.70667	0.07597	0.30713	0.10166	0.17937	0.45708	0.81354	0.0007193	0.07551
QvarGC.CORE.Unk2	avgbs2_148869.1.51	0.0179641				0.03369	0.01691	0.1641	0.04199	0.06832	0.00173	0.59573	0.07201	2.2993e-07	0.23437	0.2251	0.00125	0.11449	0.2921	0.89482	0.4539	0.36064	0.51964	0.08656	0.31564	0.65248	0.43912	0.51009	0.40928	0.7105	0.29622	0.57938	0.35316	0.48486	0.26809	0.20174	0.42266	0.67679	0.51829	0.52271	0.54976	0.95403	0.70194	0.37276	0.4211	0.46511	0.89579	0.07875	0.2332
QvarGC.CORE.Unk2	avgbs_27512.1.9	0.0219561				0.05093	0.10362	0.34156	0.05634	0.05043	0.31295	0.73139	0.03264	7.0949e-07	0.03817	0.20481	0.00103	0.08901	0.0912	0.98173	0.62072	0.67224	0.93191	0.75576	0.57712	0.36056	0.68855	0.47097	0.35726	0.56581	0.96226	0.59143	0.33237	0.27424	0.17897	0.62012	0.3367	0.24105	0.93922	0.31502	0.62707	0.44574	0.22287	0.42487	0.46253	0.46355	0.79657	0.01954	0.01486
QvarGC.CORE.Unk2	avgbs_64944.1.34	0.0219561				0.03127	0.03653	0.61776	0.04961	0.03818	0.03389	0.3075	0.02462	4.5929e-07	0.06546	0.40025	0.00407	0.11023	0.09615	0.7707	0.82015	0.70015	0.8582	0.75262	0.77418	0.19027	0.67201	0.66361	0.32406	0.6095	0.63871	0.60977	0.58944	0.64692	0.64571	0.66209	0.84575	0.18348	0.83886	0.25597	0.40003	0.48148	0.30096	0.50243	0.30113	0.44592	0.73658	0.03467	0.01734
QvarGC.CORE.Unk2	avgbs_cluster_22237.1.46	0.0219561				0.02395	0.01949	0.39899	0.06236	0.05773	0.08155	0.518	0.00581	2.9092e-08	0.0235	0.13216	0.00037266	0.01647	0.03356	0.88527	0.62344	0.43046	0.528	0.45662	0.49339	0.13371	0.74326	0.9335	0.43821	0.5909	0.2952	0.64169	0.89469	0.7956	0.51883	0.63664	0.59239	0.17902	0.46547	0.49991	0.52927	0.70074	0.70536	0.62631	0.4169	0.52499	0.3889	0.00627	0.07537
QvarGC.CORE.Unk2	avgbs_cluster_2831.1.30	0.0219561				0.04505	0.11707	0.57279	0.14642	0.00025739	0.03591	0.45804	0.13889	2.1187e-07	0.08949	9.6729e-07	0.00471	0.28381	0.06531	0.54217	0.19074	0.67507	0.12421	0.98359	0.52837	0.17732	0.30291	0.2319	0.5059	0.66939	0.1871	0.22389	0.4096	0.46002	0.543	0.57864	0.46781	0.11675	0.42719	0.17414	0.6634	0.11515	0.53938	0.3171	0.6372	0.40125	0.62396	0.04248	0.12243
QvarGC.CORE.Unk2	avgbs_cluster_14265.1.36	0.139721				0.09226	0.52396	0.16125	0.08653	0.04916	0.17128	0.34152	0.62987	4.9211e-07	0.00262	0.00248	0.1506	0.53411	0.77098	0.69512	0.34149	0.73624	0.11853	0.27834	0.26263	0.9847	0.4376	0.15275	0.24872	0.17799	0.13403	0.07596	0.05361	0.03803	0.07512	0.08593	0.27962	0.96046	0.59258	0.26598	0.63595	0.16563	0.80155	0.04803	0.92015	0.12085	0.98818	0.37313	0.3618
QvarGC.CORE.Unk3	avgbs_223186.1.44	0.0718563	Mrg18	Chr1A	37.1	0.44235	0.14683	0.81053	0.26507	0.80768	0.06341	0.65649	0.53193	8.966e-08	0.19225	0.48428	0.00058895	0.59755	0.80902	0.89711	0.50593	8.5608e-05	0.84206	0.01863	0.24021	0.78615	0.8094	0.56414	0.18863	0.23055	0.60939	0.20271	0.34758	0.59832	0.50634	0.43783	0.38799	0.94057	0.92133	0.71341	0.14496	0.87962	0.58186	0.84801	0.70649	0.30043	0.78432	0.28506	0.93978
QvarGC.CORE.Unk3	avgbs2_78971.1.48	0.249501	Mrg01	Chr1D	64.8	0.53879	0.24755	0.33001	0.54335	0.65887	0.26396	0.42638	0.18088	6.2141e-07	0.38718	0.61215	0.00050078	0.41634	0.96776	0.93994	0.49481	0.04917	0.83869	0.35753	0.40994	0.26048	0.63949	0.46565	0.53781	0.50366	0.74105	0.47251	0.76538	0.363	0.31571	0.57898	0.38143	0.29349	0.57434	0.77523	0.18855	0.89948	0.62963	0.75295	0.21223	0.77893	0.74737	0.04711	0.98901
QvarGC.CORE.Unk3	avgbs_cluster_3715.1.43	0.189621	Mrg01	Chr1D	109	0.4271	0.17634	0.95233	0.23372	0.80973	0.15523	0.77651	0.4147	1.9835e-07	0.14522	0.49761	0.00217	0.50173	0.58672	0.89115	0.49069	0.00017489	0.98967	0.01442	0.20653	0.91914	0.79953	0.52726	0.32047	0.40733	0.7948	0.32567	0.29834	0.40057	0.41866	0.41639	0.5534	0.97839	0.86161	0.52493	0.15947	0.77223	0.73263	0.62369	0.48943	0.21055	0.71158	0.16756	0.83719
QvarGC.CORE.Unk3	avgbs_21357.1.10	0.215569	Mrg13	Chr2C	18.2	0.70732	0.47279	0.51335	0.76297	0.67542	0.36359	0.80775	0.19983	1.9805e-07	0.17176	0.93064	0.00027438	0.28864	0.35155	0.67476	0.74676	0.00089383	0.87299	0.13726	0.77478	0.65514	0.74801	0.58998	0.08699	0.31286	0.88818	0.67066	0.48679	0.32762	0.55665	0.45088	0.97716	0.80978	0.83822	0.26229	0.84661	0.87849	0.62978	0.44121	0.81212	0.14714	0.42774	0.20376	0.61076
QvarGC.CORE.Unk3	avgbs_33051.1.16	0.0239521	Mrg23	Chr3A	53.7	0.29378	0.20145	0.45409	0.12698	0.66858	0.14494	0.80728	0.00051587	8.4199e-08	0.01165	0.00032426	0.00102	2.7517e-05	0.58052	0.15604	0.08544	0.00604	0.9918	0.00229	0.05848	0.27221	0.06829	0.07656	0.13915	0.09997	0.92392	0.08895	0.06133	0.04406	0.55724	0.04027	0.10751	0.30755	0.11263	0.71404	0.03622	0.32635	0.86774	0.52803	0.53231	0.0979	0.55798	0.03642	0.81047
QvarGC.CORE.Unk3	avgbs_cluster_40179.1.54	0.0199601	Mrg03	Chr5C	53.4	0.58319	0.093	0.99074	0.26046	0.85478	0.08548	0.45511	0.53068	3.3885e-07	0.22312	0.15788	0.00344	0.41161	0.50408	0.74149	0.34951	3.2107e-05	0.90617	0.00885	0.06604	0.56511	0.52047	0.49943	0.60252	0.57314	0.94082	0.33195	0.41437	0.74759	0.49012	0.22039	0.25644	0.79096	0.97183	0.73418	0.16562	0.81991	0.42261	0.99249	0.1426	0.27369	0.16639	0.29772	0.12045
QvarGC.CORE.Unk3	avgbs_cluster_15148.1.18	0.101796	Mrg06	Chr5D	72.1	0.56534	0.13332	0.9734	0.2911	0.60305	0.03783	0.84148	0.59069	3.1912e-07	0.18707	0.61315	0.00317	0.63506	0.78444	0.93169	0.59733	0.0001527	0.89693	0.02844	0.23772	0.82128	0.83727	0.72906	0.86295	0.50859	0.50839	0.41771	0.47619	0.58721	0.56089	0.54429	0.41559	0.95528	0.98586	0.80292	0.10602	0.88005	0.64367	0.85198	0.59722	0.28223	0.72692	0.31311	0.16009
QvarGC.CORE.Unk3	avgbs2_198688.1.12	0.011976	Mrg12	Chr7A	59.4	0.93852	0.72061	0.47805	0.7157	0.69428	0.94945	0.92759	0.19182	1.8283e-08	0.27172	0.71603	0.00012021	0.17457	0.09154	0.63912	0.00117	0.77726	0.00776	0.00020458	0.01102	0.00118	0.00357	0.00825	0.11341	0.67428	0.03845	0.00523	0.21064	0.00894	0.23439	0.00133	0.01025	0.03026	0.00764	0.09902	0.00041711	0.00453	0.02627	0.726	0.51629	0.0265	0.04213	0.27635	0.84889
QvarGC.CORE.Unk3	avgbs_311431.1.45	0.011976				0.15249	0.18166	0.74254	0.14872	0.68457	0.10658	0.47727	0.34283	5.5412e-08	0.18694	0.31307	0.00075214	0.4204	0.8692	0.6515	0.40704	0.0001676	0.41563	0.00831	0.18808	0.75064	0.87694	0.46004	0.63073	0.52463	0.45413	0.1941	0.31447	0.11216	0.17068	0.37169	0.25265	0.89751	0.83535	0.80296	0.23368	0.93319	0.6503	0.39843	0.3228	0.15908	0.73266	0.23617	0.19939
QvarGC.CORE.Unk3	avgbs_87463.1.7	0.0159681				0.25049	0.20948	0.91401	0.30458	0.12833	0.05439	0.26166	0.47538	3.2796e-07	0.17057	0.23316	0.00097819	0.58822	0.5168	0.94286	0.71769	4.0329e-05	0.93476	0.02986	0.35858	0.39636	0.92985	0.79861	0.58082	0.57772	0.99153	0.35579	0.44263	0.32919	0.31568	0.54125	0.78	0.31096	0.93424	0.78409	0.22096	0.89374	0.83449	0.91741	0.79535	0.10532	0.76993	0.23491	0.77019
QvarGC.CORE.Unk3	avgbs2_150794.1.12	0.0958084				0.35602	0.2394	0.97148	0.28976	0.68044	0.06497	0.18923	0.35656	2.4573e-07	0.1735	0.76774	0.00178	0.32518	0.55385	0.90648	0.41293	0.00020386	0.93576	0.01781	0.20412	0.73213	0.44606	0.44572	0.7803	0.43921	0.97831	0.14155	0.32302	0.78505	0.04532	0.52439	0.52571	0.92966	0.36214	0.67056	0.14967	0.84944	0.65222	0.73931	0.34489	0.27189	0.78418	0.08569	0.9431
QvarGC.CORE.Unk3	avgbs_79196.1.12	0.149701				0.29215	0.20833	0.93159	0.25581	0.18552	0.08765	0.11394	0.43611	2.5479e-07	0.15518	0.54464	0.00189	0.46292	0.86393	0.9496	0.22984	0.00014114	0.63567	0.01212	0.17981	0.4417	0.23089	0.24554	0.68266	0.5726	0.76373	0.16146	0.15303	0.60656	0.22594	0.39987	0.36907	0.32342	0.16002	0.44945	0.17239	0.5448	0.81259	0.81274	0.18744	0.24062	0.72433	0.29193	0.96728
QvarGC.CORE.Unk4	avgbs2_59162.1.29	0.011976				0.54387	0.17783	0.61323	0.16574	0.3747	0.11628	0.61155	0.3972	5.904e-08	0.23957	0.01681	0.00155	0.38119	0.06688	0.70956	0.46011	0.00016671	0.99576	0.01823	0.24702	0.64153	0.33883	0.68614	0.13269	0.4516	0.974	0.17526	0.36906	0.78343	0.28349	0.46588	0.63201	0.86068	0.72575	0.42351	0.01676	0.76455	0.66464	0.75297	0.12131	0.28428	0.72295	0.0982	0.78336
QvarGC.CORE.Unk4	avgbs_45323.1.23	0.0239521				0.46878	0.17555	0.9471	0.30291	0.67449	0.13025	0.75436	0.6041	2.3723e-08	0.13077	0.54242	0.00196	0.7585	0.92688	0.34246	0.26595	0.00012392	0.73581	0.04638	0.09566	0.47404	0.63985	0.55023	0.47974	0.35301	0.98541	0.49136	0.50507	0.58146	0.65832	0.53013	0.38068	0.73324	0.92423	0.78165	0.31975	0.889	0.8575	0.38589	0.58595	0.36938	0.3076	0.1731	0.90757
QvarPlump.CORE.4D	avgbs_124046.1.22	0.275449	Mrg18	Chr1A	16.5	0.1308	0.46686	0.42117	0.26059	0.58282	0.53575	0.559	0.18805	0.23258	0.55047	0.98398	0.50911	0.09274	0.77608	0.92712	0.08244	0.05645	0.53704	0.05691	0.20112	0.16175	0.12199	0.03248	0.88096	0.05253	0.33453	0.59527	0.24692	0.40337	0.12809	0.21912	0.25954	0.09128	0.09487	0.12433	0.16633	0.27314	0.21669	0.627	0.37637	0.19813	0.38152	0.62649	0.83487
QvarPlump.CORE.4D	avgbs_51988.1.24	0.197605	Mrg33	Chr2A	73	0.74868	0.7646	0.57894	0.99544	0.69314	0.78947	0.50721	0.42975	0.28912	0.31593	0.9002	0.1079	0.46903	0.57035	0.86385	0.56426	0.04002	0.33017	0.08059	0.33801	0.66499	0.69123	0.91113	0.77974	0.62059	0.57507	0.95983	0.81615	0.65111	0.54918	0.56803	0.93996	0.56935	0.92192	0.75959	0.38416	0.86919	0.73494	0.98363	0.34323	0.63936	0.81116	0.45359	0.34157
QvarPlump.CORE.4D	avgbs_6465.1.14	0.0858283	Mrg13	Chr2C	60	0.97138	0.72767	0.57586	0.73419	0.90334	0.812	0.0064	0.2268	0.27976	0.56735	0.92574	0.04674	0.43059	0.86333	0.38781	0.19986	0.01232	0.50293	0.09631	0.20514	0.25028	0.09249	0.13819	0.74276	0.30439	0.55844	0.27165	0.21056	0.06236	0.20687	0.23784	0.49394	0.44935	0.07616	0.0889	0.10995	0.33093	0.01378	0.67382	0.22903	0.01753	0.15429	0.06833	0.16293
QvarPlump.CORE.4D	avgbs_78971.1.25	0.0259481	Mrg23	Chr3A	53.8	0.15264	0.85861	0.15349	0.39544	0.20882	0.09391	0.58577	6.2039e-06	0.05501	0.00035698	0.11455	0.47901	9.9823e-06	0.88341	0.09362	0.94288	0.59751	0.18223	0.89726	0.9499	0.21783	0.6049	0.9648	0.31001	0.82483	0.77784	0.42745	0.58355	0.95305	0.94853	0.95368	0.66959	0.20778	0.22011	0.63766	0.93941	0.66829	0.37726	0.77397	0.77536	0.68252	0.71333	5.8059e-06	0.58678
QvarPlump.CORE.4D	avgbs_6K_96988.1.59	0.105788	Mrg15	Chr3C	35.1	0.75363	0.66202	0.95498	0.2427	0.51616	0.86034	0.60093	0.21186	0.082	0.55558	0.70437	0.05412	0.33775	0.54625	0.18256	0.61983	0.02663	0.35382	0.06941	0.49308	0.49024	0.76917	0.8936	0.68114	0.50581	0.58513	0.99592	0.64586	0.69318	0.61485	0.57183	0.9893	0.53031	0.63183	0.81049	0.51392	0.80303	0.82025	0.3138	0.50097	0.64319	0.89702	0.13708	0.80855
QvarPlump.CORE.4D	avgbs_cluster_42606.1.53	0.0339321	Mrg20	Chr4A	184.1	0.19915	0.99899	0.9922	0.67381	0.10365	0.40623	0.00516	0.02564	0.21862	0.73849	0.2451	0.04179	0.0133	0.22853	0.09697	0.7299	0.72255	0.61971	0.85511	0.58851	0.60677	0.4446	0.92326	0.89365	0.31271	0.22497	0.91427	0.96215	0.95986	0.59885	0.82526	0.78976	0.3338	0.53943	0.27168	0.56396	0.05584	0.60955	0.80949	0.53123	0.67955	0.06052	0.00309	0.48616
QvarPlump.CORE.4D	avgbs_28116.1.33	0.153693	Mrg11	Chr4C	8.8	0.81682	0.9317	0.98258	0.37503	0.51084	0.97465	0.66618	0.04351	0.2838	0.47822	0.65793	0.05402	0.0836	0.18242	0.8606	0.08892	0.106	0.17029	0.00673	0.12646	0.42667	0.38136	0.11543	0.51054	0.61897	0.36031	0.11391	0.13195	0.09014	0.46902	0.11429	0.42899	0.48011	0.38803	0.34945	0.48705	0.42846	0.98887	0.82916	0.4091	0.26394	0.44495	0.02442	0.8038
QvarPlump.CORE.4D	avgbs_cluster_13309.1.35	0.0259481	Mrg21	Chr4D	25.6	0.94317	0.9297	0.51627	0.90952	0.30722	0.98456	0.06608	0.00214	0.08273	0.93874	0.54865	0.00949	0.0027	0.37203	0.48939	0.75806	0.89833	0.83669	0.90266	0.82671	0.46979	0.22122	0.8991	0.63859	0.80086	0.81732	0.88451	0.74504	0.59904	0.88027	0.62314	0.861	0.73712	0.39279	0.1495	0.73515	0.12256	0.33919	0.28821	0.42299	0.59788	0.06717	0.00015724	0.73778
QvarPlump.CORE.4D	avgbs_51450.1.51	0.0259481	Mrg21	Chr4D	27.3	0.67248	0.97579	0.59454	0.91087	0.13521	0.96241	0.02953	0.00272	0.05636	0.90016	0.44677	0.00894	0.00223	0.39904	0.45167	0.93611	0.78769	0.94013	0.73648	0.93284	0.98582	0.45852	0.91575	0.84826	0.66075	0.49927	0.99742	0.96727	0.96681	0.88509	0.52505	0.80852	0.85559	0.50353	0.29916	0.68193	0.12325	0.65348	0.40446	0.55598	0.94686	0.0848	0.00063231	0.21649
QvarPlump.CORE.4D	avgbs_82250.1.43	0.0299401	Mrg21	Chr4D	27.3	0.70286	0.96875	0.58328	0.61428	0.26164	0.85794	0.04502	0.00459	0.14742	0.93273	0.60395	0.0125	0.0038	0.42331	0.38245	0.81425	0.82904	0.91128	0.84795	0.79804	0.68326	0.31907	0.96384	0.72833	0.39781	0.56062	0.84761	0.89722	0.90897	0.65449	0.78307	0.99483	0.84002	0.51455	0.07722	0.5277	0.03721	0.2011	0.1758	0.42501	0.54157	0.05952	0.00123	0.43727
QvarPlump.CORE.4D	avgbs_cluster_35424.1.22	0.235529	Mrg21	Chr4D	200.9	0.54284	0.75009	0.09057	0.8953	0.49508	0.37354	0.45853	9.4522e-05	0.58484	0.85938	0.6107	0.97018	6.1174e-05	0.57563	0.6872	0.33813	6.0043e-12	0.87264	0.26088	0.72771	0.76153	0.11882	0.19157	0.424	0.96051	0.94278	0.30914	0.23768	0.03155	0.72309	0.02468	0.10332	0.55786	0.11411	0.27535	0.00404	0.03665	0.39977	0.10446	0.31844	0.37868	0.18892	0.00017967	0.61656
QvarPlump.CORE.4D	avgbs_cluster_8260.1.42	0.105788	Mrg03	Chr5C	11.3	0.39139	0.31379	0.50599	0.49158	0.2472	0.95866	0.83088	0.0249	0.03812	0.4078	0.35114	0.07618	0.00503	0.94747	0.89688	0.29766	0.45082	0.18961	0.10862	0.05216	0.89596	0.86859	0.42111	0.13146	0.25701	0.33326	0.11309	0.31081	0.77983	0.91763	0.20094	0.15364	0.96532	0.95851	0.38595	0.05742	0.04008	0.31015	0.5808	0.08866	0.13372	0.02013	0.00277	0.91623
QvarPlump.CORE.4D	avgbs2_105734.1.28	0.00998004	Mrg03	Chr5C	91.8	0.95847	0.58053	0.56146	0.58455	0.89088	0.88263	0.91775	0.02308	0.16899	0.6619	0.65246	0.09861	0.01695	0.53954	0.93417	0.39774	0.31829	0.65403	0.19112	0.17556	0.22836	0.83663	0.11374	0.10113	0.15089	0.41885	0.16559	0.2328	0.51577	0.09824	0.02559	0.19589	0.08989	0.89693	0.38508	0.05579	0.85337	0.58729	0.7138	0.0547	0.0892	0.63414	0.04908	0.82336
QvarPlump.CORE.4D	avgbs2_181404.1.22	0.133733	Mrg06	Chr5D	58.2	0.81082	0.47628	0.45023	0.71931	0.97095	0.92943	0.23357	0.50987	0.73558	0.83183	0.43671	0.26814	0.42888	0.73802	0.69827	0.66658	0.33684	0.93169	0.1711	0.59236	0.87537	0.41611	0.50282	0.48765	0.3198	0.8638	0.47187	0.84492	0.48177	0.87181	0.7448	0.61494	0.79639	0.28222	0.6593	0.45274	0.76102	0.69518	0.69091	0.26323	0.27306	0.17655	0.81817	0.5315
QvarPlump.CORE.4D	avgbs_109473.1.7	0.0239521	Mrg06	Chr5D	108.4	0.409	0.87556	0.90928	0.35444	0.12298	0.90992	0.78871	0.05051	0.00159	0.8466	0.00131	0.2076	0.01142	0.15599	0.24113	0.818	0.42436	0.88115	0.75596	0.97213	0.96878	0.46727	0.82516	0.58111	0.27957	0.59791	0.68276	0.35637	0.26864	0.90816	0.52445	0.9398	0.83543	0.68962	0.71333	0.21058	0.82396	0.80816	0.97352	0.06211	0.87708	0.95187	0.00065466	0.82972
QvarPlump.CORE.4D	avgbs_cluster_37211.1.55	0.159681	Mrg17	Chr6C	68.3	0.90776	0.90215	0.71589	0.80508	0.5268	0.99895	0.59824	0.03176	0.54659	0.47453	0.84128	0.44783	0.04503	0.35893	0.7479	0.72308	0.06703	0.90466	0.24443	0.81259	0.62432	0.86987	0.99727	0.72091	0.40378	0.97093	0.97285	0.53907	0.4996	0.47982	0.69633	0.96658	0.75905	0.98196	0.69708	0.43537	0.80393	0.94919	0.60301	0.24652	0.73441	0.88456	0.02781	0.81396
QvarPlump.CORE.4D	avgbs2_110004.1.6	0.309381	Mrg04	Chr6D	40.2	0.10673	0.28254	0.27826	0.21122	0.05497	0.85156	0.30409	0.56879	0.20413	0.78941	0.93412	0.61916	0.61874	0.55057	0.64487	0.27611	0.01092	0.09653	0.31311	0.23733	0.47022	0.73132	0.70415	0.85427	0.82099	0.70908	0.76883	0.71633	0.29361	0.64042	0.77983	0.96245	0.44946	0.98813	0.99012	0.66002	0.83439	0.8583	0.59045	0.42314	0.71962	0.52225	0.56577	0.42373
QvarPlump.CORE.4D	avgbs_cluster_16720.1.34	0.0319361	Mrg12	Chr7A	44.5	0.32281	0.17914	0.20332	0.62637	0.35549	0.90329	0.00277	0.82477	0.58377	0.97253	0.70939	0.76194	0.8964	0.91401	0.60676	0.42719	0.43891	0.95504	0.25124	0.50501	0.55054	0.30726	0.22178	0.32302	0.34691	0.55909	0.0531	0.10892	0.17175	0.04266	0.17775	0.20773	0.37305	0.03979	0.25363	0.80026	0.07901	0.77794	0.54359	0.4985	0.57691	0.36101	0.28	0.79224
QvarPlump.CORE.4D	avgbs_231728	0.011976	Mrg09	Chr7C	53.1	0.64862	0.93182	0.35942	0.52499	0.43958	0.97695	0.31612	0.03142	0.82722	0.45702	0.04608	0.04805	0.03117	0.45875	0.20983	0.49792	0.91255	0.63726	0.66367	0.99962	0.78886	0.08222	0.89263	0.68278	0.02518	0.96079	0.65405	0.94582	0.14313	0.65484	0.81761	0.66455	0.55635	0.15498	0.11911	0.10904	0.19979	0.30536	0.42652	0.00561	0.89629	0.46142	0.24867	0.23829
QvarPlump.CORE.4D	avgbs_13.1.41	0.0618762	Mrg02	Chr7D	81.5	0.57033	0.02852	0.69419	0.7224	0.08065	0.4624	0.55054	0.31785	0.27691	0.45841	0.27291	0.08777	0.31607	0.5747	0.55474	0.64474	0.08603	0.36631	0.0199	0.5681	0.54224	0.59011	0.96036	0.86353	0.10052	0.40336	0.95404	0.33283	0.41987	0.55403	0.15281	0.90967	0.54364	0.54448	0.67523	0.02133	0.88274	0.86506	0.84996	0.06727	0.58051	0.93887	0.32976	0.50574
QvarPlump.CORE.4D	avgbs_cluster_16853.1.15	0.00998004				0.12242	0.79997	0.7213	0.16424	0.24419	0.364	0.86824	0.0266	0.87334	0.18808	0.16861	0.06288	0.0281	0.3503	0.26395	0.4206	0.2435	0.33928	0.06182	0.10368	0.3895	0.98552	0.32278	0.08421	0.0454	0.49086	0.45129	0.08045	0.61228	0.02202	0.18284	0.44416	0.38373	0.92857	0.58416	0.47591	0.72495	0.2325	0.4074	0.2781	0.18713	0.19245	0.0018	0.85906
QvarPlump.CORE.4D	avgbs_cluster_9130.1.32	0.00998004				0.15895	0.93437	0.76938	0.07242	0.07274	0.6221	0.27219	0.01337	0.00994	0.00045874	0.26309	0.00617	0.01702	0.62169	0.17073	0.04104	0.42501	0.02645	0.00334	0.02873	0.02936	0.31201	0.11357	0.07541	0.05295	0.06239	0.66593	0.10142	0.28774	0.0055	0.06704	0.12264	0.04555	0.33145	0.07914	0.51828	0.04833	0.08975	0.34568	0.9077	0.03479	0.04657	0.00155	0.76229
QvarPlump.CORE.4D	avgbs_4768.1.37	0.011976				0.54919	0.64593	0.60242	0.16568	0.76039	0.43794	0.48802	0.00013527	0.08115	0.01092	0.21769	0.04511	0.00013385	0.80747	0.4809	0.62556	0.45348	0.19301	0.11848	0.38326	0.27726	0.88652	0.60522	0.24469	0.02937	0.16972	0.55658	0.34599	0.29481	0.01031	0.47847	0.65127	0.13903	0.74126	0.82403	0.17182	0.89928	0.22356	0.49056	0.20396	0.70884	0.88318	0.00226	0.83568
QvarPlump.CORE.4D	avgbs_68464.1.37	0.011976				0.79828	0.81381	0.38339	0.26166	0.74096	0.20637	0.69229	0.0103	0.22689	0.08539	0.11771	0.13601	0.00588	0.58653	0.79376	0.3228	0.42271	0.19057	0.03881	0.23911	0.33217	0.93771	0.51212	0.12367	0.08045	0.31263	0.85433	0.42423	0.34004	0.04791	0.23715	0.55612	0.28304	0.732	0.76711	0.18921	0.56389	0.16439	0.25385	0.14876	0.44593	0.66084	0.05523	0.54384
QvarPlump.CORE.4D	avgbs_cluster_4553.1.49	0.011976				0.94669	0.78129	0.62317	0.55093	0.90155	0.80744	0.17586	0.06685	0.30715	0.29711	0.08335	0.40297	0.00955	0.45492	0.26302	0.33615	0.03396	0.18444	0.035	0.27346	0.33451	0.80289	0.48678	0.80719	0.70788	0.30145	0.36746	0.09547	0.46939	0.20275	0.33032	0.4905	0.35188	0.72302	0.52879	0.2371	0.66945	0.10154	0.97701	0.29857	0.1615	0.70883	0.01139	0.62748
QvarPlump.CORE.4D	avgbs2_122146.1.24	0.011976				0.71556	0.57138	0.36939	0.21364	0.73112	0.23133	0.79927	0.01092	0.22922	0.08077	0.12019	0.1369	0.00763	0.65631	0.76327	0.27378	0.42635	0.1767	0.02552	0.21694	0.3562	0.96633	0.39355	0.14052	0.05905	0.25325	0.92281	0.34014	0.26155	0.04734	0.203	0.56112	0.32797	0.81984	0.86665	0.15186	0.5919	0.15448	0.33036	0.10413	0.4577	0.70414	0.04309	0.53012
QvarPlump.CORE.4D	avgbs_279917.1.46	0.0139721				0.82958	0.65609	0.57739	0.45842	0.9522	0.44085	0.89266	0.0175	0.399	0.16713	0.14982	0.10415	0.01037	0.88011	0.57009	0.56007	0.61622	0.45823	0.24267	0.33957	0.38011	0.84943	0.26967	0.47587	0.09021	0.58445	0.12211	0.29076	0.29726	0.02951	0.31161	0.3199	0.31687	0.94503	0.46437	0.32092	0.89685	0.38892	0.68523	0.19749	0.14524	0.6168	0.1566	0.79978
QvarPlump.CORE.4D	avgbs_32033.1.47	0.0139721				0.23203	0.7585	0.43079	0.09583	0.00538	0.99559	0.50335	0.00275	0.04917	0.00081053	0.88744	0.22694	0.00415	0.94574	0.90323	0.58894	0.68803	0.34398	0.15742	0.35177	0.27503	0.74022	0.74974	0.24503	0.14456	0.55502	0.91753	0.04547	0.81532	0.04867	0.26434	0.63422	0.15889	0.66354	0.77489	0.92315	0.50313	0.12679	0.98868	0.61694	0.52225	0.63179	0.00054586	0.99449
QvarPlump.CORE.4D	avgbs_cluster_16050.1.17	0.0139721				0.09324	0.96411	0.92161	0.01032	0.1383	0.53466	0.6008	0.0006056	0.01108	0.00036926	0.83992	0.01221	0.00092105	0.81068	0.29119	0.12716	0.34168	0.05195	0.01003	0.04427	0.10992	0.55764	0.12934	0.03598	0.02717	0.10938	0.5972	0.01057	0.36838	0.00155	0.06921	0.12758	0.07557	0.64559	0.14115	0.84736	0.23729	0.04231	0.40785	0.48633	0.07994	0.15061	4.9755e-05	0.91688
QvarPlump.CORE.4D	avgbs_215778	0.0159681				0.50546	0.36684	0.92198	0.17868	0.61919	0.48149	0.69255	0.00036905	0.55924	0.1251	0.57482	0.09624	0.00125	0.95305	0.40344	0.12021	0.42986	0.07931	0.02627	0.02419	0.78496	0.24323	0.17523	0.0315	0.00416	0.34892	0.2868	0.02256	0.66595	0.00035824	0.14304	0.18146	0.52282	0.22991	0.50893	0.23131	0.81071	0.0818	0.29831	0.538	0.15591	0.22962	0.00168	0.69314
QvarPlump.CORE.4D	avgbs_94013.1.10	0.0159681				0.55336	0.81828	0.35932	0.46573	0.37917	0.79856	0.19762	0.00545	0.17838	0.49736	0.47989	0.01977	0.0072	0.60468	0.5265	0.99617	0.90237	0.8827	0.68399	0.97195	0.84093	0.60616	0.9459	0.68108	0.13702	0.98523	0.97614	0.85222	0.9265	0.29984	0.53547	0.77537	0.9055	0.61353	0.32622	0.72725	0.6093	0.57504	0.23211	0.62417	0.7715	0.27888	0.0035	0.18898
QvarPlump.CORE.4D	avgbs_cluster_19451.1.35	0.0159681				0.58637	0.88049	0.54309	0.35894	0.84398	0.71198	0.44744	0.00266	0.39732	0.42228	0.90786	0.06442	0.01322	0.93387	0.70454	0.83224	0.60455	0.37586	0.48654	0.6201	0.92505	0.64389	0.73332	0.11136	0.01696	0.47876	0.81905	0.26368	0.79644	0.00223	0.65311	0.85401	0.8025	0.86479	0.69265	0.70728	0.62457	0.51592	0.77177	0.92593	0.82486	0.97343	0.0012	0.68774
QvarPlump.CORE.4D	avgbs_cluster_39833.1.14	0.0179641				0.2906	0.56822	0.81709	0.00798	0.53878	0.45996	0.52125	0.00045087	0.06338	0.00551	0.63083	0.08039	0.00063024	0.66586	0.58902	0.1048	0.27266	0.01223	0.01713	0.02847	0.89839	0.71817	0.1233	0.05631	0.04058	0.04646	0.65157	0.00852	0.18617	0.00091113	0.09366	0.08878	0.42314	0.624	0.54798	0.14862	0.34461	0.05325	0.84164	0.27499	0.13191	0.36939	1.3569e-05	0.84319
QvarPlump.CORE.4D	avgbs_cluster_1879.1.40	0.0199601				0.45427	0.63839	0.80399	0.25038	0.00242	0.61007	0.74204	0.1689	0.02876	0.04131	0.0138	0.21832	0.06539	0.70092	0.80409	0.24164	0.48737	0.00856	0.69441	0.58129	0.0124	0.43487	0.32314	0.98146	0.25378	0.08588	0.93262	0.05857	0.2564	0.53011	0.62528	0.8786	0.05684	0.73225	0.72263	0.82022	0.55868	0.83216	0.78372	0.08715	0.57361	0.82421	0.77632	0.77653
QvarPlump.CORE.4D	avgbs_cluster_42208.1.15	0.0199601				0.18074	0.78977	0.5982	0.02724	0.40437	0.15356	0.04271	0.00137	0.03715	0.00128	0.71912	0.00696	0.00246	0.87832	0.43195	0.55026	0.72756	0.08163	0.06942	0.29316	0.07654	0.90482	0.61226	0.12375	0.03947	0.04197	0.75573	0.10654	0.61225	0.02325	0.29916	0.66158	0.0424	0.97607	0.56257	0.68689	0.40179	0.20931	0.2644	0.74998	0.28021	0.17121	0.00022404	0.94208
QvarPlump.CORE.4D	avgbs2_103877.1.55	0.0199601				0.31472	0.05967	0.52586	0.46314	0.54872	0.22543	0.7659	0.00246	0.01494	0.59068	0.5447	0.08678	0.00115	0.37372	0.20906	0.6527	0.86032	0.44425	0.26164	0.24848	0.71301	0.98201	0.28709	0.12446	0.02118	0.61816	0.5723	0.09178	0.62224	0.24786	0.29863	0.50231	0.52921	0.8266	0.71539	0.07124	0.88796	0.08429	0.6048	0.08803	0.28267	0.88613	1.9052e-05	0.52812
QvarPlump.CORE.4D	avgbs_213662	0.0219561				0.94422	0.27359	0.44949	0.72483	0.61956	0.38992	0.62435	0.00812	0.2598	0.56501	0.55432	0.04609	0.01334	0.84681	0.71679	0.16654	0.45924	0.01073	0.13264	0.02239	0.70183	0.57468	0.07782	0.10408	0.00334	0.06975	0.06142	0.02759	0.24895	0.00019564	0.35641	0.06955	0.99993	0.40102	0.31858	0.6201	0.57581	0.269	0.12188	0.97825	0.2836	0.0568	0.00274	0.60932
QvarPlump.CORE.4D	avgbs_12036.1.8	0.0259481				0.60863	0.88489	0.46653	0.75649	0.90927	0.51866	0.25888	0.05435	0.05119	0.88271	0.81874	0.0021	0.07757	0.52066	0.74553	0.79541	0.69826	0.99123	0.82336	0.83834	0.73721	0.54834	0.9049	0.90754	0.06314	0.33278	0.71301	0.93031	0.66478	0.36369	0.89047	0.94525	0.67956	0.33481	0.42	0.66004	0.16905	0.63427	0.91951	0.47962	0.99247	0.4051	0.06619	0.29922
QvarPlump.CORE.4D	avgbs_37294.1.46	0.0259481				0.03774	0.14721	0.85652	0.21398	0.10368	0.03291	0.02958	0.98245	0.2472	0.52797	0.72092	0.9689	0.81402	0.9731	0.71131	0.01096	0.3892	0.00295	0.00473	0.03161	0.24039	0.00361	0.17089	0.44045	0.44883	0.03635	0.09951	0.19224	0.24078	0.12532	0.07455	0.24619	0.36763	0.03226	0.76678	0.05851	0.36783	0.35483	0.47063	0.64325	0.13106	0.47324	0.63367	0.58615
QvarPlump.CORE.4D	avgbs_cluster_32966.1.58	0.0718563				0.84907	0.88658	0.8492	0.95331	0.57591	0.90302	0.33772	0.30432	0.27747	0.73728	0.82516	0.16508	0.39101	0.52758	0.93412	0.70242	0.1149	0.62566	0.14925	0.50672	0.75074	0.89389	0.99361	0.93539	0.38543	0.67092	0.58096	0.71148	0.43052	0.52325	0.82523	0.857	0.77438	0.67305	0.56259	0.41526	0.53461	0.66408	0.32317	0.49506	0.46109	0.92339	0.38607	0.80019
QvarPlump.CORE.4D	avgbs_cluster_20311.1.7	0.0978044				0.67483	0.81382	0.43019	0.8609	0.60785	0.92886	0.97536	0.44374	0.44739	0.92769	0.6929	0.13578	0.52961	0.07904	0.58246	0.15764	0.3154	0.0535	0.05452	0.23392	0.28899	0.53774	0.64195	0.77233	0.41776	0.38391	0.33353	0.84043	0.0665	0.58263	0.26586	0.68488	0.28413	0.88156	0.57752	0.86199	0.51386	0.25248	0.18889	0.40216	0.49268	0.38459	0.60512	0.56557
QvarPlump.CORE.4D	avgbs_96638.1.23	0.181637				0.10355	0.70949	0.9298	0.1354	0.01185	0.53977	0.22285	0.43457	0.58921	0.94042	0.63939	0.32662	0.56907	0.35205	0.99591	0.76652	0.61682	0.65445	0.87558	0.68874	0.31114	0.49281	0.70079	0.97664	0.48576	0.75156	0.97904	0.56836	0.77981	0.60123	0.89927	0.88091	0.43575	0.45197	0.91737	0.74798	0.96801	0.81014	0.93798	0.44263	0.80514	0.67353	0.82485	0.33605
QvarPlump.CORE.4D	avgbs_cluster_11406.1.29	0.215569				0.98465	0.79006	0.97386	0.68946	0.22771	0.26545	0.94529	0.03527	0.64756	0.90144	0.35607	0.46811	0.0603	0.98808	0.95437	0.07892	0.34395	0.05307	0.09037	0.08233	0.6542	0.1811	0.14141	0.80535	0.19766	0.09933	0.1877	0.55227	0.121	0.47756	0.12494	0.22882	0.70061	0.37641	0.64496	0.96883	0.22624	0.78124	0.44279	0.91522	0.99109	0.34446	0.24277	0.907
QvarPlump.CORE.4D	avgbs_cluster_11406.1.10	0.271457				0.80628	0.73724	0.98406	0.79329	0.05848	0.58924	0.89913	0.00116	0.57519	0.30011	0.09987	0.30725	0.00509	0.81992	0.4022	0.19064	0.37037	0.17851	0.20812	0.14921	0.70544	0.35439	0.16231	0.82497	0.30095	0.16395	0.13212	0.53276	0.1713	0.54348	0.12446	0.25328	0.77576	0.50694	0.81717	0.97851	0.42686	0.92169	0.84588	0.74736	0.9843	0.52706	0.02669	0.96221
QvarPlump.CORE.5C	avgbs_200649.1.36	0.273453	Mrg03	Chr5C	25	0.05255	0.80437	0.50573	0.35831	0.05932	0.60897	0.11773	0.15154	0.87187	0.90116	0.59409	0.63289	0.56203	0.51152	0.45417	0.07942	1.1923e-07	0.63778	0.32032	0.00151	0.00475	0.01032	0.03675	0.48297	0.028	0.98344	0.07819	0.47002	0.01115	0.17277	0.80279	0.00404	0.02471	0.04269	0.33261	0.8786	0.53789	0.58957	0.64598	0.51895	0.49923	0.27213	0.83072	0.486
QvarPlump.CORE.5C	avgbs2_146190.1.36	0.301397	Mrg03	Chr5C	28.8	0.05285	0.75041	0.51047	0.30808	0.04604	0.66933	0.13648	0.15532	0.9021	0.81572	0.64252	0.68943	0.51664	0.6498	0.42727	0.07238	1.133e-07	0.61965	0.27766	0.00145	0.0047	0.00948	0.04023	0.43441	0.03276	0.96515	0.07352	0.53075	0.01164	0.18873	0.79755	0.00387	0.02635	0.04087	0.27569	0.85501	0.50376	0.53264	0.68141	0.4927	0.39796	0.27424	0.70726	0.88998
QvarPlump.CORE.6C	avgbs_6K_109589.1.51	0.253493	Mrg17	Chr6C	70.5	0.67636	0.47527	0.62677	0.74934	0.89619	0.9043	0.05861	0.33642	0.51747	0.18368	0.37805	0.06585	0.38218	0.19274	0.95409	0.27995	1.7345e-10	0.11451	0.27307	0.25282	0.51036	0.35253	0.54939	0.14679	0.91274	0.50879	0.35357	0.93748	0.95259	0.9368	0.48236	0.40876	0.39963	0.20339	0.92625	0.25266	0.63575	0.59492	0.39699	0.62037	0.58304	0.17475	0.41094	0.85929
QvarPlump.CORE.7D	avgbs2_12115.1.19	0.189621	Mrg02	Chr7D	85.2	0.80362	0.0521	0.89527	0.88098	0.63325	0.79026	0.99183	0.92218	0.9725	0.69294	0.59606	0.74005	0.73984	0.64241	0.32911	0.24337	2.8465e-08	0.67573	0.1927	0.07436	0.06827	0.33788	0.65445	0.466	0.06636	0.44278	0.66443	0.77754	0.49203	0.21225	0.5189	0.13537	0.1301	0.34884	0.44943	0.428	0.55139	0.86751	0.24105	0.40949	0.77413	0.17612	0.74181	0.91296
QvarPlump.CORE.Unk1	avgbs_cluster_18344.1.23	0.135729	Mrg18	Chr1A	41.5	0.81997	0.85525	0.64129	0.69634	0.85438	0.63645	0.61569	0.32139	0.33381	0.64417	0.84432	0.6653	0.38641	0.02463	0.20834	0.38892	2.6059e-07	0.58136	0.97594	0.84351	0.27753	0.61823	0.4112	0.63511	0.89629	0.32345	0.36408	0.54154	0.59728	0.79111	0.96625	0.77988	0.28728	0.73397	0.31014	0.65443	0.09647	0.51356	0.4195	0.40357	0.244	0.11083	0.54056	0.74519
QvarPlump.CORE.Unk1	avgbs_102674.1.21	0.115768	Mrg28	Chr1C	31.8	0.39321	0.42207	0.93359	0.03818	0.40012	0.49569	0.6642	0.34347	0.88757	0.63942	0.07491	0.19388	0.56974	0.18681	0.26028	0.81137	7.6121e-15	0.31532	0.81753	0.31906	0.87886	0.01879	0.77801	0.06431	0.67726	0.17516	0.35232	0.5377	0.40933	0.1144	0.88239	0.64275	0.88249	0.06711	0.25564	0.00294	0.00393	0.04034	0.05601	0.88377	0.48928	0.01326	0.45865	0.96381
QvarPlump.CORE.Unk1	avgbs_223316.1.55	0.0558882	Mrg28	Chr1C	43.8	0.8659	0.48961	0.79848	0.95204	0.23638	0.42183	0.17603	0.91192	0.50268	0.76659	0.14311	0.15759	0.99444	0.39779	0.61975	0.9594	3.8021e-09	0.61399	0.93012	0.99181	0.93581	0.06317	0.87216	0.01548	0.2532	0.33413	0.54235	0.95789	0.9957	0.52144	0.99352	0.79487	0.81976	0.12315	0.48742	0.0209	0.01148	0.16289	0.14708	0.67642	0.70123	0.17248	0.86456	0.97165
QvarPlump.CORE.Unk1	avgbs_31951.1.11	0.0618762	Mrg28	Chr1C	43.8	0.82322	0.32807	0.86808	0.92886	0.6435	0.32496	0.89773	0.56776	0.70035	0.75273	0.20313	0.13586	0.71449	0.05854	0.29793	0.96489	5.8643e-15	0.61182	0.79642	0.37707	0.93695	0.01742	0.7183	0.03378	0.46946	0.4732	0.64106	0.40154	0.42791	0.89036	0.74218	0.51163	0.96344	0.08741	0.46936	0.0021	0.03717	0.07011	0.11622	0.61153	0.6293	0.03319	0.68152	0.99959
QvarPlump.CORE.Unk1	avgbs2_15947.1.37	0.131737	Mrg33	Chr2A	37.7	0.50214	0.15062	0.31949	0.33797	0.65588	0.13148	0.48507	0.79981	0.69325	0.55729	0.79454	0.53966	0.76872	0.22595	0.13823	0.70356	1.4016e-11	0.85954	0.68275	0.83115	0.92255	0.00818	0.82885	0.56625	0.86478	0.93676	0.48442	0.81265	0.9872	0.76339	0.68226	0.47517	0.72567	0.04695	0.83792	0.2568	0.16754	0.69762	0.82206	0.61533	0.5394	0.57683	0.1958	0.91739
QvarPlump.CORE.Unk1	avgbs_cluster_42568.1.19	0.011976	Mrg33	Chr2A	44.3	0.79609	0.11949	0.78847	0.93888	0.80043	0.27448	0.99481	0.65727	0.16864	0.82688	0.28455	0.1435	0.7621	0.1656	0.3738	0.62942	2.2697e-15	0.61894	0.42325	0.36092	0.82036	0.00832	0.71171	0.06894	0.86555	0.5964	0.50834	0.59726	0.47173	0.72842	0.51515	0.68102	0.75535	0.05508	0.52437	0.00152	0.02913	0.04797	0.09208	0.87043	0.45958	0.03481	0.27325	0.99965
QvarPlump.CORE.Unk1	avgbs2_25499.1.15	0.10978	Mrg13	Chr2C	114.6	0.20065	0.37522	0.31329	0.68401	0.21557	0.77325	0.24887	0.04956	0.3403	0.66059	0.39003	0.32784	0.02112	0.01357	0.37199	0.54902	3.3212e-09	0.00076063	0.68086	0.56768	0.44954	0.70285	0.51257	0.86169	0.1597	0.03359	0.60609	0.96688	0.85362	0.80275	0.4753	0.27549	0.447	0.92592	0.02917	0.80633	0.00538	0.12541	0.02464	0.97897	0.32418	0.02344	0.23173	0.97351
QvarPlump.CORE.Unk1	avgbs2_47439.1.32	0.125749	Mrg08	Chr2D	62.4	0.12071	0.22541	0.3011	0.76279	0.59974	0.09311	0.05205	0.72904	0.94857	0.44096	0.08013	0.17993	0.83435	0.54114	0.18659	0.79032	1.4922e-07	0.43687	0.70984	0.50822	0.74211	0.1038	0.80488	0.0525	0.49492	0.33049	0.64448	0.88334	0.92274	0.9335	0.88893	0.85376	0.70754	0.19706	0.22551	0.00128	0.15777	0.08144	0.27913	0.06041	0.3955	0.25483	0.75061	0.50363
QvarPlump.CORE.Unk1	avgbs_cluster_40786.1.31	0.129741	Mrg08	Chr2D	105.9	0.33687	0.52361	0.17587	0.74249	0.02219	0.45433	0.90174	0.48006	0.43231	0.38725	0.14441	0.01699	0.66843	0.09005	0.1984	0.45102	6.2692e-15	0.5147	0.22599	0.22527	0.57713	0.00516	0.53835	0.10237	0.86486	0.9382	0.19279	0.34342	0.18606	0.3549	0.32066	0.29595	0.66899	0.03327	0.54417	0.00123	0.0396	0.06606	0.11244	0.87728	0.38393	0.03198	0.57176	0.57928
QvarPlump.CORE.Unk1	avgbs2_188620.1.31	0.337325	Mrg08	Chr2D	129.6	0.54618	0.43946	0.92814	0.68939	0.38876	0.72924	0.16226	0.64974	0.64545	0.17156	0.18715	0.12972	0.88992	0.01358	0.01967	0.69244	1.085e-08	0.77901	0.84802	0.76735	0.3186	0.01787	0.33979	0.67833	0.86167	0.63459	0.52065	0.20933	0.46849	0.09926	0.63803	0.27233	0.13038	0.013	0.61337	0.00284	0.2687	0.02961	0.5377	0.80855	0.39826	0.24562	0.86202	0.14362
QvarPlump.CORE.Unk1	avgbs2_184391.1.37	0.239521	Mrg08	Chr2D	140.5	0.57041	0.09346	0.20615	0.64485	0.55468	0.16727	0.96395	0.4612	0.72545	0.2819	0.08203	0.17034	0.6116	0.09718	0.52326	0.49404	1.9119e-15	0.24714	0.34741	0.32696	0.77304	0.00642	0.5941	0.0206	0.82811	0.16943	0.50514	0.37654	0.10089	0.85521	0.88756	0.2092	0.44981	0.04954	0.62187	0.0023	0.05307	0.05703	0.11754	0.96307	0.55884	0.0614	0.5598	0.39912
QvarPlump.CORE.Unk1	avgbs_18812.1.60	0.167665	Mrg15	Chr3C	23.6	0.97623	0.13378	0.66488	0.64246	0.6774	0.53532	0.55222	0.51763	0.29303	0.73369	0.36082	0.01792	0.88284	0.04478	0.20872	0.87845	4.3731e-07	0.81252	0.52863	0.53271	0.75295	0.60609	0.75524	0.2809	0.82037	0.82118	0.69204	0.75664	0.41169	0.46031	0.16067	0.71545	0.82222	0.67947	0.72986	0.06391	0.06194	0.26999	0.34052	0.76503	0.60994	0.28592	0.55877	0.86634
QvarPlump.CORE.Unk1	avgbs2_104597.1.13	0.121756	Mrg15	Chr3C	26.9	0.02738	0.35975	0.24565	0.04401	0.55816	0.05138	0.47707	0.80795	0.41435	0.61318	0.09389	0.5601	0.94239	0.4677	0.07723	0.91071	2.4448e-07	0.421	0.77348	0.45644	0.8589	0.1375	0.40825	0.00666	0.74359	0.19813	0.07287	0.3026	0.08305	0.13025	0.32957	0.19304	0.95961	0.21452	0.24952	0.08727	0.06556	0.38668	0.05764	0.85431	0.16598	0.10535	0.58433	0.92134
QvarPlump.CORE.Unk1	avgbs2_41160.2.7	0.111776	Mrg20	Chr4A	122.8	0.00889	0.29983	0.06036	0.04747	0.02545	0.06947	0.09362	0.81095	0.94046	0.83254	0.28771	0.26611	0.87772	0.1977	0.94672	0.43986	2.0697e-07	0.51016	0.65869	0.71816	0.99805	0.01653	0.65708	0.44569	0.30789	0.81562	0.50179	0.74569	0.72305	0.03163	0.91948	0.8945	0.84442	0.05915	0.95	0.10985	0.69893	0.03953	0.51916	0.81557	0.82506	0.60869	0.785	0.85355
QvarPlump.CORE.Unk1	avgbs2_60058.1.36	0.237525	Mrg20	Chr4A	215.7	0.92409	0.0913	0.48602	0.73571	0.83666	0.87117	0.59527	0.35051	0.60417	0.6087	0.99349	0.46756	0.20607	0.06098	0.68706	0.03768	3.4545e-07	0.03635	0.0265	0.19956	0.26735	0.13905	0.10974	0.61521	0.71013	0.02649	0.23757	0.19474	0.19334	0.04589	0.01589	0.23477	0.06768	0.41211	0.69328	0.05307	0.4305	0.12113	0.83994	0.80792	0.55948	0.86242	0.38826	0.22973
QvarPlump.CORE.Unk1	avgbs2_30178.1.16	0.229541	Mrg20	Chr4A	241	0.29143	0.92841	0.28602	0.23714	0.05779	0.2454	0.80819	0.2051	0.8227	0.05436	0.13273	0.08119	0.45901	0.0429	0.02213	0.56127	1.1169e-11	0.21586	0.61878	0.92264	0.35316	0.00732	0.97349	0.25423	0.16536	0.25471	0.81275	0.66422	0.89993	0.91314	0.67382	0.89862	0.46906	0.03449	0.97191	0.11582	0.48459	0.11113	0.77699	0.62832	0.9098	0.66962	0.43697	0.9279
QvarPlump.CORE.Unk1	avgbs_118512.1.14	0.0958084	Mrg11	Chr4C	54	0.86137	0.82953	0.89323	0.61507	0.75734	0.56751	0.95453	0.724	0.97347	0.55715	0.0599	0.11958	0.85613	0.09261	0.25661	0.94905	1.2243e-14	0.55031	0.70783	0.40267	0.76717	0.01989	0.72238	0.06983	0.89552	0.85154	0.42983	0.56311	0.51192	0.24974	0.562	0.52168	0.99915	0.04448	0.29853	0.00393	0.02508	0.02326	0.11695	0.47087	0.35166	0.03612	0.59218	0.51821
QvarPlump.CORE.Unk1	avgbs_cluster_8014.1.48	0.0938124	Mrg11	Chr4C	68.6	0.18592	0.2347	0.44397	0.08954	0.28628	0.27616	0.12825	0.44735	0.90287	0.29557	0.21444	0.12578	0.59815	0.06219	0.4055	0.14182	3.1767e-07	0.34253	0.17255	0.02585	0.62355	0.10038	0.12421	0.02303	0.9536	0.28121	0.13786	0.29385	0.01782	0.79982	0.13773	0.07603	0.48018	0.00549	0.00698	0.0421	0.00171	0.00563	0.00086635	0.84937	0.07728	0.00016968	0.61691	0.79761
QvarPlump.CORE.Unk1	avgbs_cluster_26995.1.63	0.0319361	Mrg21	Chr4D	123.5	0.18654	0.83981	0.63404	0.16951	0.2287	0.94298	0.65854	0.0181	0.86393	0.02759	0.44972	0.07066	0.11991	0.276	0.49359	0.16811	5.4076e-08	0.768	0.46737	0.15309	0.64791	0.03876	0.60679	0.20965	0.88278	0.75432	0.53597	0.36919	0.46129	0.72439	0.75938	0.24289	0.73718	0.13599	0.61338	0.13512	0.20663	0.44263	0.73689	0.61145	0.3836	0.15163	0.00562	0.75768
QvarPlump.CORE.Unk1	avgbs_120412.1.33	0.0518962	Mrg21	Chr4D	181.1	0.88091	0.52659	0.65989	0.79737	0.91923	0.37369	0.52475	0.54774	0.83806	0.71878	0.74473	0.59387	0.43482	0.9696	0.73205	0.77261	9.6544e-09	0.8703	0.91041	0.62436	0.93655	0.0523	0.93311	0.93734	0.99195	0.93589	0.95909	0.87507	0.96038	0.56424	0.45448	0.8665	0.68485	0.08975	0.59625	0.07331	0.1766	0.25094	0.13117	0.70684	0.65881	0.04826	0.32075	0.98037
QvarPlump.CORE.Unk1	avgbs_cluster_35424.1.15	0.231537	Mrg21	Chr4D	200.9	0.40367	0.82574	0.07961	0.8882	0.74892	0.19793	0.57184	2.0723e-05	0.71593	0.79176	0.27679	0.14112	2.3728e-05	0.21758	0.32693	0.47967	7.4435e-15	0.7131	0.46067	0.41402	0.8007	0.00569	0.17935	0.10625	0.85112	0.95257	0.35151	0.1918	0.05409	0.89594	0.03403	0.10887	0.69402	0.01061	0.4277	0.00127	0.01814	0.07356	0.06063	0.33317	0.29135	0.039	0.00022031	0.68114
QvarPlump.CORE.Unk1	avgbs2_28340.1.14	0.167665	Mrg24	Chr5A	37.3	0.5724	0.58538	0.57993	0.46731	0.79976	0.19741	0.35116	0.40688	0.87166	0.8459	0.00849	0.01899	0.6068	0.07726	0.08094	0.92857	3.2719e-08	0.91176	0.78062	0.68883	0.63527	0.0288	0.9899	0.46253	0.43316	0.8917	0.73978	0.71691	0.6877	0.04158	0.73051	0.92184	0.45932	0.03766	0.47951	0.18095	0.38103	0.12878	0.23252	0.18017	0.25948	0.12066	0.50977	0.68812
QvarPlump.CORE.Unk1	avgbs_215688.1.43	0.131737	Mrg24	Chr5A	64.6	0.41287	0.72088	0.8688	0.40982	0.75697	0.14616	0.36464	0.68108	0.37287	0.89415	0.37799	0.4995	0.7132	0.56125	0.08455	0.49346	5.2049e-07	0.18916	0.4677	0.38108	0.04525	0.03025	0.23708	0.58845	0.28858	0.1838	0.30684	0.19705	0.25449	0.29308	0.29982	0.25749	0.27315	0.06109	0.24214	0.19284	0.54585	0.04104	0.08836	0.98453	0.34276	0.58884	0.85696	0.10238
QvarPlump.CORE.Unk1	avgbs2_187974.1.18	0.143713	Mrg24	Chr5A	78.6	0.81607	0.95308	0.65712	0.53558	0.94968	0.56449	0.53256	0.46399	0.89727	0.19462	0.16531	0.55776	0.69638	0.2354	0.76696	0.58387	9.3209e-07	0.49206	0.53919	0.22531	0.82074	0.56677	0.17405	0.14332	0.46127	0.82309	0.17102	0.07964	0.11748	0.95017	0.60675	0.22594	0.61261	0.99151	0.03244	8.6136e-05	0.12213	0.10826	0.36949	0.40265	0.13154	0.0505	0.66618	0.54116
QvarPlump.CORE.Unk1	avgbs_cluster_23713.1.32	0.217565	Mrg03	Chr5C	6.7	0.87803	0.66056	0.66438	0.89233	0.23141	0.39123	0.99776	0.63143	0.54198	0.53477	0.25943	0.32078	0.86437	0.624	0.7395	0.84109	2.2665e-07	0.26076	0.73553	0.34664	0.89122	0.18973	0.3379	0.0095	0.40641	0.25677	0.08348	0.06133	0.04678	0.98035	0.6263	0.328	0.92458	0.22311	0.06186	0.11111	0.05622	0.36226	0.00808	0.11736	0.13147	0.06549	0.71864	0.68293
QvarPlump.CORE.Unk1	avgbs2_110852.2.32	0.217565	Mrg03	Chr5C	6.7	0.82866	0.46646	0.64408	0.91639	0.08421	0.37372	0.78068	0.4716	0.56211	0.45597	0.19746	0.33959	0.74487	0.6725	0.77371	0.75874	1.6181e-07	0.23006	0.67051	0.39086	0.83704	0.21347	0.38499	0.00955	0.28783	0.24346	0.11502	0.06319	0.03917	0.98548	0.56425	0.37479	0.87174	0.22044	0.14699	0.08417	0.06803	0.5394	0.01617	0.08858	0.17794	0.09474	0.9046	0.72972
QvarPlump.CORE.Unk1	avgbs2_37960.1.31	0.269461	Mrg03	Chr5C	11.2	0.68971	0.59264	0.33119	0.7996	0.04993	0.56007	0.60054	0.7315	0.16502	0.60887	0.23264	0.30692	0.91908	0.69646	0.4999	0.55958	1.3328e-07	0.41435	0.51562	0.9577	0.63438	0.03131	0.93247	0.00486	0.2367	0.66777	0.37369	0.37718	0.42665	0.45938	0.73903	0.83729	0.47223	0.02069	0.24937	0.01319	0.24614	0.02268	0.16306	0.03444	0.75928	0.72449	0.45658	0.6314
QvarPlump.CORE.Unk1	avgbs_98464.1.31	0.0419162	Mrg03	Chr5C	35.8	0.77782	0.35476	0.75281	0.89553	0.63651	0.33464	0.93217	0.59172	0.60476	0.45947	0.28951	0.07242	0.71732	0.10948	0.30102	0.74862	3.1229e-15	0.58002	0.61748	0.45694	0.98003	0.01325	0.7542	0.08899	0.7929	0.84625	0.64064	0.70518	0.44692	0.8598	0.85933	0.66634	0.91622	0.06654	0.38758	0.00137	0.02455	0.04307	0.11613	0.96233	0.46022	0.03006	0.6957	0.2414
QvarPlump.CORE.Unk1	avgbs_cluster_33588.1.22	0.0399202	Mrg03	Chr5C	67	0.59591	0.76895	0.26212	0.72263	0.59141	0.27826	0.9544	0.45707	0.30351	0.74507	0.04073	0.13	0.70031	0.06692	0.20793	0.73846	3.7098e-15	0.14015	0.63949	0.38093	0.93319	0.00889	0.67969	0.08477	0.4028	0.25946	0.55048	0.6038	0.47881	0.55064	0.68179	0.55772	0.81916	0.02796	0.61747	0.00071017	0.05089	0.03931	0.05323	0.69799	0.60075	0.07382	0.67074	0.98145
QvarPlump.CORE.Unk1	avgbs_cluster_17324.1.34	0.159681	Mrg03	Chr5C	75.8	0.14261	0.54397	0.46258	0.37251	0.09697	0.31425	0.40827	0.17067	0.84596	0.76132	0.14262	0.20283	0.11855	0.11963	0.13075	0.74411	5.1932e-15	0.67998	0.72704	0.46093	0.92926	0.00825	0.76885	0.10769	0.81444	0.90583	0.66129	0.40968	0.42839	0.69152	0.81437	0.61662	0.70223	0.04313	0.53954	0.00181	0.04513	0.04385	0.10957	0.98804	0.56622	0.06265	0.28889	0.96348
QvarPlump.CORE.Unk1	avgbs_cluster_19728.1.27	0.101796	Mrg03	Chr5C	82.8	0.78423	0.11866	0.51174	0.58236	0.80667	0.86954	0.56048	0.52748	0.53069	0.30538	0.07037	0.57497	0.62725	0.33921	0.06867	0.86981	3.0534e-08	0.935	0.91687	0.93425	0.58004	0.03698	0.72253	0.76288	0.50733	0.66869	0.45972	0.70401	0.78937	0.14084	0.47845	0.96156	0.70034	0.02539	0.35386	0.00144	0.34565	0.05101	0.81211	0.20892	0.42759	0.62397	0.80195	0.44377
QvarPlump.CORE.Unk1	avgbs_70879.1.19	0.0718563	Mrg06	Chr5D	72.1	0.58403	0.58929	0.79111	0.75157	0.54452	0.33476	0.69349	0.27209	0.9111	0.5791	0.12303	0.09361	0.27191	0.1077	0.21757	0.9508	3.2272e-14	0.47787	0.66314	0.27968	0.91456	0.02174	0.80033	0.08328	0.40067	0.434	0.63617	0.76398	0.32869	0.37696	0.76996	0.50428	0.9518	0.07782	0.59693	0.00244	0.03019	0.04048	0.09426	0.70447	0.39652	0.06873	0.50193	0.53734
QvarPlump.CORE.Unk1	avgbs_cluster_30052.1.32	0.255489	Mrg17	Chr6C	37.3	0.69435	0.7964	0.686	0.77896	0.19184	0.5397	0.56313	0.10135	0.67596	0.49278	0.17283	0.45566	0.20638	0.54687	0.39337	0.30734	5.6756e-09	0.48185	0.23798	0.20403	0.59721	0.02795	0.3493	0.07415	0.6312	0.78276	0.12704	0.29318	0.02681	0.25744	0.84514	0.49438	0.6717	0.06623	0.15561	0.00107	0.01547	0.02014	0.14888	0.0887	0.11533	0.02471	0.39791	0.77517
QvarPlump.CORE.Unk1	avgbs_14004.1.51	0.397206	Mrg17	Chr6C	40.1	0.02534	0.24132	0.02394	0.26326	0.75192	0.12578	0.06014	0.52037	0.74684	0.75436	0.69907	0.89563	0.60115	0.35663	0.27526	0.42518	3.2137e-07	0.53366	0.25346	0.19128	0.75647	0.17037	0.57102	0.00239	0.66274	0.88832	0.41819	0.2916	0.41914	0.60891	0.5321	0.52535	0.63571	0.19598	0.22301	0.04442	0.2315	0.69529	0.07211	0.61117	0.13358	0.08043	0.80854	0.78787
QvarPlump.CORE.Unk1	avgbs_cluster_2629.1.37	0.239521	Mrg17	Chr6C	79	0.62537	0.32953	0.78367	0.95345	0.32331	0.37534	0.51486	0.26524	0.01125	0.83736	0.10013	0.62645	0.15997	0.17117	0.38162	0.65086	7.2328e-08	0.75996	0.4671	0.59112	0.19012	0.27336	0.58885	0.47362	0.82869	0.55529	0.76031	0.50627	0.12316	0.1173	0.79276	0.54322	0.11818	0.68576	0.61508	0.01634	0.71149	0.05706	0.86288	0.02506	0.85757	0.93544	0.98595	0.76923
QvarPlump.CORE.Unk1	avgbs2_165561.1.24	0.191617	Mrg17	Chr6C	102.3	0.05534	0.414	0.42956	0.40719	0.06242	0.14295	0.10652	0.71904	0.33013	0.8368	0.60088	0.14595	0.74113	0.33947	0.4487	0.92502	7.7897e-11	0.64627	0.74184	0.95974	0.76884	0.02617	0.76892	0.54843	0.35359	0.56706	0.63552	0.95475	0.8555	0.3652	0.88856	0.6451	0.9662	0.06263	0.8847	0.15302	0.48501	0.47209	0.64197	0.4202	0.84332	0.91902	0.17154	0.00925
QvarPlump.CORE.Unk1	avgbs_cluster_6294.1.24	0.0938124	Mrg04	Chr6D	41.8	0.37401	0.86898	0.85084	0.87458	0.21741	0.19013	0.44863	0.85415	0.81705	0.72056	0.87958	0.40145	0.82102	0.58119	0.54811	0.48874	2.4374e-08	0.90001	0.57178	0.62521	0.63492	0.03701	0.5755	0.39921	0.95875	0.67148	0.84291	0.53765	0.3351	0.32352	0.9346	0.3588	0.41528	0.04994	0.9192	0.00924	0.4984	0.05851	0.22702	0.35663	0.95147	0.52729	0.44155	0.506
QvarPlump.CORE.Unk1	avgbs_16668.1.22	0.0718563	Mrg12	Chr7A	63.5	0.87585	0.80151	0.87415	0.98146	0.66252	0.31611	0.98172	0.11292	0.27628	0.51718	0.14563	0.10121	0.17342	0.11391	0.27902	0.82008	8.0176e-16	0.52462	0.306	0.36429	0.37694	0.00902	0.71398	0.08857	0.76374	0.84906	0.13233	0.19754	0.33328	0.86328	0.23635	0.55616	0.24755	0.03709	0.45639	0.00375	0.03702	0.06047	0.11476	0.90438	0.33055	0.02823	0.39087	0.35201
QvarPlump.CORE.Unk1	avgbs_37501.1.11	0.167665	Mrg09	Chr7C	16.3	0.51241	0.00816	0.41001	0.64017	0.04123	0.52336	0.36338	0.79477	0.91344	0.57011	0.43666	0.11391	0.94378	0.26979	0.11673	0.56927	9.0791e-07	0.75686	0.78267	0.63728	0.76917	0.05481	0.35671	0.87146	0.45259	0.52099	0.49	0.34671	0.97453	0.0252	0.54356	0.40273	0.37516	0.06791	0.98586	0.00223	0.53223	0.02425	0.29133	0.40621	0.99651	0.77922	0.9832	0.61364
QvarPlump.CORE.Unk1	avgbs_cluster_2814.1.20	0.145709	Mrg09	Chr7C	44.7	0.61988	0.39553	0.46128	0.47175	0.17304	0.32599	0.73039	0.77498	0.83257	0.85803	0.01352	0.00384	0.85876	0.12187	0.11062	0.7894	1.3303e-09	0.63398	0.93954	0.61906	0.75311	0.10165	0.99408	0.61962	0.66042	0.94369	0.80862	0.91818	0.997	0.84708	0.77764	0.92433	0.78539	0.16258	0.17232	0.03374	0.05344	0.45171	0.10324	0.51396	0.41029	0.11715	0.92607	0.35006
QvarPlump.CORE.Unk1	avgbs2_63417.1.24	0.0199601	Mrg09	Chr7C	86.4	0.15396	0.89494	0.51779	0.17058	0.33579	0.30357	0.59272	0.7248	0.0083	0.94931	0.69953	0.11481	0.72409	0.32101	0.11346	0.31909	1.1669e-07	0.38065	0.49429	0.23266	0.4125	0.03997	0.13779	0.36227	0.1587	0.53958	0.07916	0.12888	0.18063	0.42742	0.36643	0.26979	0.88816	0.06635	0.30625	0.02407	0.05129	0.0787	0.05833	0.70399	0.36482	0.02116	0.19036	0.47722
QvarPlump.CORE.Unk1	avgbs_11655.1.50	0.191617	Mrg02	Chr7D	72.7	0.15184	0.89829	0.17793	0.18855	0.76956	0.92397	0.95299	0.64933	0.40831	0.4496	0.63324	0.29348	0.80938	0.24351	0.22248	0.85963	1.0038e-07	0.63181	0.73018	0.92214	0.60526	0.04276	0.96311	0.35571	0.79169	0.71375	0.75068	0.71298	0.78446	0.64125	0.74725	0.93039	0.74637	0.06364	0.83235	0.4507	0.817	0.40115	0.24714	0.90692	0.99779	0.89137	0.26764	0.85201
QvarPlump.CORE.Unk1	avgbs2_192904.2.41	0.101796	Mrg02	Chr7D	96.3	0.40572	0.37536	0.24083	0.5333	0.59961	0.27746	0.35013	0.32024	0.98781	0.94137	0.05687	0.03266	0.55064	0.06654	0.09717	0.90629	2.05e-08	0.99984	0.97126	0.84122	0.92439	0.02923	0.81341	0.33559	0.149	0.8894	0.88451	0.85514	0.72961	0.02695	0.90326	0.66082	0.71576	0.04658	0.52483	0.04876	0.16296	0.04033	0.0578	0.07703	0.10201	0.31361	0.05843	0.28837
QvarPlump.CORE.Unk1	avgbs2_20734.1.38	0.0359281	Mrg02	Chr7D	111.4	0.07302	0.81432	0.07229	0.05664	0.47549	0.08309	0.89645	0.91069	0.68539	0.33308	0.24527	0.90469	0.9759	0.60148	0.39156	0.528	6.938e-08	0.2389	0.64259	0.17814	0.35957	0.39095	0.59637	0.11371	0.86717	0.50394	0.35039	0.46539	0.49053	0.11209	0.7125	0.31282	0.78822	0.34927	0.26079	0.06893	0.00449	0.79673	0.06828	0.20753	0.503	0.13591	0.89501	0.65759
QvarPlump.CORE.Unk1	avgbs_5678.1.26	0.011976				0.70834	0.61389	0.14884	0.92543	0.75064	0.3868	0.86648	0.48951	0.00519	0.03882	0.29378	0.07242	0.63531	0.14488	0.21893	0.48494	8.2337e-15	0.07521	0.57948	0.2721	0.909	0.0038	0.55621	0.03057	0.2099	0.19433	0.34647	0.36786	0.38288	0.4962	0.72833	0.58484	0.79768	0.01362	0.43124	0.00267	0.02308	0.01915	0.10169	0.83352	0.45339	0.00656	0.73827	0.1046
QvarPlump.CORE.Unk1	avgbs_112385.1.63	0.0139721				0.93536	0.76103	0.9526	0.77211	0.57076	0.40953	0.97568	0.36729	0.51749	0.73144	0.24006	0.0387	0.57748	0.03101	0.0849	0.93829	7.0763e-15	0.67022	0.90001	0.45695	0.73691	0.01799	0.47019	0.05632	0.07403	0.85406	0.55556	0.81858	0.23501	0.59114	0.90797	0.28678	0.74024	0.08953	0.5752	0.0006702	0.02678	0.02706	0.11657	0.27128	0.58682	0.06397	0.57943	0.9727
QvarPlump.CORE.Unk1	avgbs_cluster_51943.1.24	0.0139721				0.75623	0.88304	0.86621	0.95392	0.10637	0.50529	0.94596	0.24807	0.00060033	0.01512	5.6723e-05	0.2006	0.02862	0.0768	0.63056	0.68109	9.8772e-07	0.36154	0.09919	0.21203	0.56189	0.37893	0.51873	0.37279	0.69661	0.37601	0.58472	0.9166	0.58755	0.59672	0.026	0.35313	0.67909	0.48949	0.56835	0.02568	0.43677	0.10761	0.26827	0.37493	0.00876	0.03285	0.35532	0.49799
QvarPlump.CORE.Unk1	avgbs_107870.1.27	0.0179641				0.61546	0.29241	0.79022	0.13849	0.50374	0.14345	0.95464	0.79583	0.24652	0.33093	0.58325	0.611	0.67015	0.06926	0.71672	0.20107	6.2513e-11	0.74398	0.57494	0.37829	0.66223	0.0882	0.99313	0.0575	0.04869	0.73662	0.84413	0.26208	0.9212	0.6108	0.90879	0.39109	0.58482	0.16073	0.95755	0.31471	0.48345	0.56163	0.77045	0.92759	0.72787	0.85638	0.58872	0.89599
QvarPlump.CORE.Unk1	avgbs_cluster_8522.1.48	0.0179641				0.92181	0.35744	0.46456	0.97947	0.75496	0.33184	0.79825	0.46611	0.03094	0.54434	0.19191	0.09864	0.58117	0.09252	0.28813	0.82791	5.6179e-15	0.15233	0.63988	0.47685	0.61804	0.00762	0.75501	0.09679	0.65431	0.45724	0.59504	0.55934	0.38737	0.93137	0.72491	0.65099	0.79349	0.04674	0.53352	0.00343	0.04166	0.05628	0.15903	0.96897	0.30548	0.02541	0.6708	0.00083738
QvarPlump.CORE.Unk1	avgbs_23760.1.11	0.0219561				0.6379	0.6185	0.59423	0.54279	0.70412	0.42129	0.42109	0.34503	0.00101	0.72791	0.2329	0.01554	0.1545	0.07326	0.24793	0.85014	1.3198e-14	0.67039	0.68046	0.24038	0.93911	0.04272	0.81012	0.05449	0.78795	0.79752	0.57856	0.69874	0.41049	0.79608	0.78177	0.45786	0.89608	0.13214	0.46612	0.00194	0.04706	0.02748	0.11436	0.76073	0.49271	0.01665	0.31283	0.98688
QvarPlump.CORE.Unk1	avgbs2_19689.1.48	0.0219561				0.82442	0.08158	0.77519	0.69408	0.76903	0.17089	0.93781	0.31835	0.91497	0.77402	0.49378	0.19967	0.28847	0.17008	0.30098	0.77533	7.1304e-15	0.69043	0.32703	0.47279	0.83696	0.00428	0.63431	0.06846	0.44867	0.90321	0.51403	0.64658	0.48233	0.85319	0.67097	0.66726	0.56675	0.03594	0.39356	0.00266	0.0271	0.03859	0.04166	0.93597	0.14394	0.0472	0.71882	0.97096
QvarPlump.CORE.Unk1	avgbs_22968.1.61	0.0239521				0.73583	0.67463	0.90163	0.26562	0.79963	0.3228	0.5207	0.36427	0.6245	0.55049	0.21794	0.2178	0.27319	0.14162	0.35684	0.96404	1.299e-14	0.55562	0.75713	0.35878	0.50371	0.01721	0.91416	0.07992	0.35343	0.91573	0.71877	0.56173	0.52821	0.18963	0.82598	0.56406	0.38359	0.08476	0.31262	0.00406	0.01017	0.06918	0.13985	0.91825	0.45041	0.00799	0.15035	0.96606
QvarPlump.CORE.Unk1	avgbs_58986.1.54	0.0239521				0.58654	0.59019	0.75702	0.96564	0.04374	0.35428	0.65125	0.33115	0.34277	0.56925	0.09991	0.19878	0.53224	0.10847	0.37056	0.70498	2.0922e-15	0.43868	0.86527	0.42284	0.89492	0.00339	0.82115	0.07016	0.53752	0.72291	0.64524	0.70001	0.51744	0.84614	0.68371	0.8268	0.78268	0.03158	0.43603	0.00426	0.02418	0.05859	0.10063	0.92868	0.60386	0.06508	0.60524	0.83266
QvarPlump.CORE.Unk1	avgbs_cluster_9252.1.12	0.0259481				0.81794	0.65327	0.32397	0.75508	0.33951	0.11339	0.93599	0.27987	0.63362	0.09532	0.35131	0.08731	0.37941	0.15678	0.23189	0.90854	6.823e-15	0.49633	0.56496	0.3004	0.9872	0.01594	0.68126	0.07878	0.73309	0.83979	0.45346	0.54234	0.23427	0.19332	0.55123	0.50072	0.67704	0.05602	0.21474	0.00066805	0.07411	0.08064	0.09574	0.00517	0.4329	0.04873	0.9105	0.99704
QvarPlump.CORE.Unk1	avgbs_41531.1.24	0.0299401				0.47676	0.0078	0.48023	0.54623	0.17833	0.45828	0.03843	0.08369	0.04254	0.19093	0.14013	0.02402	0.2484	0.07658	0.43208	0.42041	8.6046e-07	0.38586	0.20541	0.1708	0.82385	0.52921	0.19013	0.00572	0.23095	0.22742	0.17643	0.5908	0.11839	0.24178	0.04734	0.14719	0.88047	0.86084	0.3117	0.05441	0.00243	0.33817	0.12223	0.70032	0.12404	0.02009	0.38779	0.22849
QvarPlump.CORE.Unk1	avgbs_23337.1.20	0.0319361				0.17731	0.84863	0.42159	0.28489	0.76077	0.28748	0.39029	0.95514	0.05352	0.98029	0.42493	0.28283	0.81406	0.44351	0.32183	0.20472	6.5663e-09	0.0109	0.15571	0.22422	0.49207	0.01982	0.30399	0.13198	0.72012	0.08981	0.1206	0.34109	0.3053	0.67296	0.14307	0.3636	0.49623	0.05916	0.27873	0.05423	0.04426	0.04906	0.20547	0.9365	0.02488	0.13102	0.95298	0.08062
QvarPlump.CORE.Unk1	avgbs_cluster_56276.1.10	0.0499002				0.98325	0.73929	0.85554	0.97078	0.66331	0.34423	0.81025	0.609	0.99927	0.29763	0.07291	0.29291	0.60759	0.43095	0.27118	0.993	8.7523e-08	0.40479	0.75934	0.48802	0.90732	0.16018	0.70338	0.12751	0.51318	0.53366	0.57799	0.85187	0.76052	0.39365	0.22807	0.25057	0.75774	0.27892	0.61823	0.00044962	0.42938	0.02913	0.06113	0.70248	0.37535	0.02901	0.97732	0.96034
QvarPlump.CORE.Unk1	avgbs_101449.1.50	0.0518962				0.56554	0.75163	0.91634	0.67548	0.35857	0.20316	0.74145	0.54016	0.64239	0.24054	0.19648	0.15452	0.57295	0.17228	0.2713	0.95973	2.0339e-14	0.56124	0.70807	0.37168	0.93781	0.01437	0.94036	0.0895	0.85415	0.93199	0.76609	0.81316	0.64781	0.70653	0.29345	0.70153	0.70863	0.05823	0.40889	0.00501	0.02509	0.07528	0.09519	0.8185	0.61265	0.03581	0.97195	0.83199
QvarPlump.CORE.Unk1	avgbs_cluster_52322.1.22	0.0618762				0.75007	0.77266	0.96607	0.33123	0.71434	0.41434	0.49798	0.9985	0.91481	0.52232	0.84474	0.60021	0.92598	0.63305	0.88441	0.78944	1.9546e-11	0.50446	0.93232	0.89914	0.99077	0.29325	0.77268	0.00037687	0.7285	0.54	0.46955	0.86785	0.819	0.43452	0.85829	0.51588	0.73027	0.16596	0.47762	0.00139	0.511	0.05257	0.6394	0.54143	0.85059	0.76439	0.19748	0.94449
QvarPlump.CORE.Unk1	avgbs_cluster_7086.1.33	0.0698603				0.70659	0.61331	0.81255	0.30123	0.58517	0.34345	0.7884	0.60283	0.82259	0.47327	0.2624	0.16442	0.78273	0.17015	0.35277	0.47686	2.3376e-15	0.55285	0.38904	0.30476	0.43575	0.00671	0.69319	0.05152	0.7393	0.70323	0.77472	0.29012	0.29069	0.92217	0.57203	0.63402	0.24972	0.02876	0.31811	0.00168	0.05122	0.02122	0.0246	0.91429	0.50192	0.04399	0.86958	0.5422
QvarPlump.CORE.Unk1	avgbs2_58963.1.7	0.0738523				0.16854	0.40061	0.52353	0.06894	0.14268	0.29607	0.36948	0.19446	0.96855	0.8705	0.03985	0.45953	0.267	0.35454	0.0199	0.03286	1.7201e-07	0.05271	0.09024	0.04065	0.9013	0.00674	0.01455	0.12171	0.2555	0.08348	0.01852	0.00417	0.05389	0.49016	0.20455	0.0336	0.80754	0.02789	0.03973	0.04975	0.00226	0.1679	0.13069	0.59992	0.06177	0.0101	0.65041	0.54663
QvarPlump.CORE.Unk1	avgbs_89652.1.29	0.0798403				0.12144	0.81982	0.30188	0.46308	0.44878	0.22004	0.72569	0.40764	0.75399	0.30228	0.4334	0.09214	0.65369	0.08214	0.27043	0.81611	1.572e-14	0.81769	0.87676	0.65155	0.90198	0.00336	0.60296	0.09862	0.65609	0.91381	0.85589	0.23083	0.19207	0.13098	0.71535	0.83039	0.61271	0.01133	0.6178	0.00175	0.06342	0.03332	0.14882	0.95679	0.52829	0.08191	0.77657	0.39973
QvarPlump.CORE.Unk1	avgbs_23081.1.9	0.0818363				0.69499	0.8321	0.78597	0.7867	0.62493	0.50853	0.99322	0.592	0.15247	0.83719	0.36403	0.1363	0.46223	0.14621	0.21903	0.80791	1.6638e-14	0.38034	0.61771	0.09094	0.5889	0.02583	0.51105	0.07669	0.69446	0.71211	0.31585	0.4102	0.23004	0.95538	0.28508	0.18024	0.44022	0.09925	0.3014	0.00573	0.00763	0.12557	0.07897	0.91651	0.34227	0.00521	0.46121	0.85807
QvarPlump.CORE.Unk1	avgbs_cluster_5615.1.56	0.0838323				0.71436	0.01091	0.107	0.69473	0.17206	0.22955	0.80668	0.93709	0.18294	0.83239	0.99506	0.12607	0.55841	0.16959	0.79421	0.26386	1.8841e-07	0.18654	0.20477	0.22738	0.38914	0.11353	0.26938	0.18564	0.99848	0.26427	0.21138	0.05325	0.11887	0.36967	0.39862	0.28642	0.69215	0.26966	0.18988	0.01484	0.02283	0.14263	0.06829	0.74629	0.46967	0.06744	0.80233	0.35739
QvarPlump.CORE.Unk1	avgbs_28503.1.8	0.0978044				0.82658	0.53238	0.57951	0.83255	0.79417	0.06098	0.74142	0.44821	0.59629	0.42987	0.38342	0.3413	0.54067	0.16012	0.44969	0.87421	4.4214e-08	0.4633	0.70377	0.62001	0.7219	0.03956	0.83192	0.10636	0.88385	0.73101	0.70687	0.85806	0.77105	0.68138	0.26943	0.67897	0.35776	0.08187	0.78388	0.00404	0.24871	0.17938	0.75984	0.43802	0.49066	0.21113	0.21163	0.56446
QvarPlump.CORE.Unk1	avgbs_29701.1.30	0.101796				0.73435	0.54322	0.70988	0.85671	0.68409	0.46594	0.10153	0.97642	0.80468	0.89823	0.93118	0.16702	0.89518	0.43551	0.8984	0.46123	4.4789e-07	0.65175	0.23139	0.1353	0.43902	0.17533	0.25661	0.23421	0.50702	0.81089	0.15222	0.11861	0.3607	0.63867	0.15577	0.24666	0.64075	0.18918	0.10342	0.05402	0.15257	0.05529	0.29615	0.08965	0.13888	0.0745	0.69407	0.60549
QvarPlump.CORE.Unk1	avgbs_50022.1.52	0.105788				0.76213	0.84246	0.94028	0.86491	0.46483	0.0364	0.96569	0.41675	0.62236	0.44443	0.10419	0.10154	0.62345	0.10122	0.30475	0.89573	5.157e-15	0.349	0.57744	0.27412	0.87357	0.03538	0.6058	0.06873	0.82656	0.61452	0.38852	0.43038	0.38553	0.49311	0.77187	0.51615	0.83296	0.13391	0.24937	0.00137	0.01031	0.10118	0.08147	0.63044	0.32299	0.01131	0.71477	0.87824
QvarPlump.CORE.Unk1	avgbs2_103129.2.30	0.113772				0.0427	0.1568	0.66168	0.01175	0.19193	0.08542	0.50839	0.87733	0.92703	0.20125	0.44803	0.23853	0.80047	0.4986	0.45924	0.76755	2.4351e-07	0.64231	0.70611	0.43058	0.46938	0.28197	0.79076	0.46037	0.90256	0.93615	0.97986	0.52747	0.69372	0.17531	0.35687	0.47144	0.40624	0.67715	0.96214	0.10904	0.06922	0.20137	0.10069	0.19436	0.76097	0.17853	0.68911	0.95102
[truncated: 209 more rows]
[truncated: 11 more columns]
